# Supplementary material for: A cluster-randomized controlled trial of the effectiveness of the JUMP Math program of math instruction for improving elementary math achievement
Source: PLoS One. 2019 Oct 30;14(10):e0223049. doi: 10.1371/journal.pone.0223049 (PMC6821143; doi:10.1371/journal.pone.0223049)
Supplement: S1 Dataset — (XLSX) [file pone.0223049.s002.xlsx]

## Sheet: Pilot Study Data
Child_ID	Teacher_ID	School_ID	Gender	Curriculum	WorkMem	IQComp	VerbalIQ	NonVerbalIQ	Grade_Type	MathAgePre	MathAgePost	ReadAgePre	ReadAgePost	Days_Absent	LetterWdID_pre	Cal_pre	MathFlu_pre	QuantCon_pre	LetterWdID_post	Cal_post	MathFlu_post	QuantCon_post
6104	7929	9875	M	1	3	118	95	88	1	10.87	11.33	10.93	11.35	2.5	107	86	71	90	107	72	69	95
6105	7929	9875	F	1	3	105	55	63	1	10.1	10.56	10.15	10.54	10	98	82	86	113	103	83	95	128
6106	7929	9875	F	1	2	90	37	25	1	10.83	11.28	10.89	11.28	0.5	96	84	88	92	96	73	95	83
6107	7929	9875	F	1	3	79	23	8	1	9.96	10.43	10.02	10.41	10.5	86	83	67	76	83	68	65	78
6108	7929	9875	M	1	4	93	21	32	1	10.68	11.13	10.7	11.11	2	93	82	77	83	91	70	84	95
6109	7929	9875	F	1	3	123	87	94	1	10.09	10.53	10.11	10.52	8	114	76	78	110	106	80	81	103
6110	7929	9875	F	1	4	103	77	58	1	11.1	11.54	11.11	11.52	2	107	95	79	97	111	75	82	96
6028	7930	9876	F	1	4	126	82	96	0	10.81	11.19	10.69	11.13	3	107	104	103	109	115	105	104	115
6029	7930	9876	M	1	5	113	87	81	0	10.82	11.2	10.7	11.15	9	105	108	106	129	106	101	103	129
6030	7930	9876	M	1	7	102	77	55	0	10.99	11.38	10.87	11.32	8.5	114	95	84	94	124	100	96	99
6031	7930	9876	M	1	6	116	58	86	0	10.36	10.74	10.24	10.68	7	108	94	96	108	117	94	100	111
6032	7930	9876	M	1	5	97	42	42	0	10.57	10.96	10.46	10.9	6	89	81	73	95	88	75	81	96
6033	7930	9876	M	1	4	107	53	68	0	10.53	10.92	10.42	10.86	2	115	93	97	117	118	96	89	124
6034	7930	9876	F	1	3	107	75	68	0	10.38	10.76	10.26	10.7	4	98	98	95	100	99	101	94	97
6035	7930	9876	M	1	4	96	53	39	0	10.35	10.74	10.24	10.68	6.5	101	98	107	104	111	94	111	107
6036	7930	9876	F	1	2	93	55	32	0	10.07	10.45	9.96	10.39	2	100	82	87	99	102	83	85	99
6037	7930	9876	F	1	4	101	47	53	0	10.25	10.64	10.14	10.58	7	96	91	79	94	94	69	80	100
6016	7931	9877	M	1	2	90	42	25	0	10.42	10.87	10.41	10.84	2.5	97	79	82	96	102	72	84	81
6017	7931	9877	F	1	2	100	55	50	0	10.11	10.53	10.07	10.51	16	88	93	80	93	86	82	84	95
6018	7931	9877	F	1	4	102	37	55	0	10.07	10.51	10.04	10.47	20	93	61	74	75	94	71	74	90
6019	7931	9877	F	1	5	96	34	39	0	10.28	10.71	10.25	10.68	2	93	77	76	84	95	69	80	78
6020	7931	9877	F	1	4	91	23	27	0	10.74	11.16	10.71	11.13	20.5	82	69	73	59	85	62	70	70
6021	7931	9877	M	1	3	107	45	68	0	10.4	10.84	10.37	10.8	13	94	75	81	103	90	76	77	100
6022	7931	9877	M	1	3	94	23	34	0	10.92	11.36	10.9	11.33	4	96	93	107	103	99	96	109	114
6023	7931	9877	M	1	3	88	19	21	0	11.08	11.51	11.04	11.47	4.5	80	66	76	86	79	78	71	90
6024	7931	9877	M	1	3	76	9	5	0	10.51	10.96	10.48	10.92	14	99	71	85	99	99	75	89	99
6025	7931	9877	F	1	3	97	34	42	0	10.27	10.72	10.25	10.68	8.5	103	106	86	100	102	84	90	106
6026	7931	9877	M	1	4	105	68	63	0	10.83	11.27	10.8	11.23	14	81	83	82	97	80	90	90	119
6027	7931	9877	M	1	2	103	53	58	0	10.44	10.88	10.41	10.84	29.5	100	67	73	60	101	64	70	73
6081	7931	9877	F	1	4	96	32	39	0	10.67	11.1	10.64	11.07	26	99	76	95	91	107	84	93	118
6082	7931	9877	M	1	3	94	34	34	0	10.37	10.8	10.34	10.77	0	107	86	100	96	102	79	106	102
6083	7931	9877	F	1	3	104	45	61	0	10.82	11.25	10.79	11.22	8.5	114	94	84	94	117	84	83	103
6084	7931	9877	M	1	3	100	37	50	0	12.01	12.44	11.98	12.41	2.5	75	69	74	92	82	70	70	98
6085	7931	9877	M	1	2	91	42	27	0	10.93	11.4	10.92	11.35	1	92	76	85	88	91	89	78	102
6086	7931	9877	F	1	4	93	55	32	0	10.66	11.13	10.65	11.08	35	105	93	84	87	114	80	82	90
6064	7933	9877	M	1	4	111	58	77	1	10.45	10.94	10.44	10.96	0	107	98	104	113	109	95	104	108
6065	7933	9877	F	1	4	108	45	70	1	10.78	11.27	10.77	11.28	6	102	93	89	110	98	88	88	101
6066	7933	9877	M	1	4	103	53	58	1	10.51	11	10.5	11.02	10	105	89	95	99	111	92	98	112
6067	7933	9877	F	1	4	97	42	42	1	9.73	10.22	9.72	10.24	3	96	83	83	87	92	75	90	99
6068	7933	9877	F	1	4	107	53	68	1	10.47	10.96	10.46	10.98	0.5	105	94	95	107	104	100	100	106
6069	7933	9877	M	1	3	94	47	34	1	10.68	11.16	10.67	11.18	11	110	82	80	94	109	99	88	100
6070	7933	9877	M	1	5	111	77	77	1	10.68	11.17	10.68	11.19	8	122	129	120	152	108	131	122	150
6071	7933	9877	M	1	4	127	93	96	1	10.46	10.92	10.44	10.87	11	118	96	92	106	115	89	96	113
6072	7933	9877	F	1	3	100	58	50	1	10.3	10.76	10.28	10.72	6.5	93	65	77	100	100	70	74	95
6073	7933	9877	F	1	3	102	27	55	1	9.83	10.29	9.81	10.25	17	106	61	68	95	99	73	71	95
6088	7934	9877	M	1	3	100	37	50	2	10.81	11.28	10.8	11.23	13	102	96	99	102	103	89	102	98
6089	7934	9877	F	1	5	104	37	61	2	10.81	11.27	10.81	11.23	6	97	98	89	101	97	98	89	95
6091	7934	9877	M	1	3	101	37	53	2	10.54	11	10.54	10.96	10	111	100	96	96	106	94	103	127
6092	7934	9877	F	1	6	103	45	58	2	10.51	10.97	10.51	10.93	15.5	106	104	77	117	108	90	87	133
6093	7934	9877	F	1	4	103	68	58	2	10.19	10.65	10.18	10.61	10.5	98	90	86	110	99	103	94	110
6094	7934	9877	M	1	3	100	53	50	2	9.98	10.45	9.96	10.4	2	101	103	86	98	106	110	95	108
6095	7934	9877	F	1	3	116	68	86	2	10.75	11.22	10.74	11.17	2	112	103	94	124	116	102	96	123
6096	7934	9877	F	1	4	119	66	90	2	10.69	11.15	10.66	11.1	5	113	96	96	105	117	81	103	100
6097	7934	9877	F	1	2	99	58	47	2	10.46	10.93	10.43	10.87	8.5	112	97	93	99	113	117	116	119
6098	7934	9877	F	1	4	75	47	5	2		11.29	10.79	11.23	10	82	94	89	94	82	94	94	97
6038	7935	9877	F	1	2	113	58	81	2	10.41	10.87	10.39	10.84	2	82	80	84	74	84	76	92	84
6039	7935	9877	F	1	6	111	84	77	2	10.47	10.92	10.45	10.89	45	109	83	82	110	104	89	83	116
6040	7935	9877	M	1	3	102	27	55	2	10.72	11.14	10.71	11.14	6	90	88	82	91	99	77	75	101
6041	7935	9877	M	1	5	90	3	25	2	11.06	11.51	11.04	11.48	4	97	106	104	95	97	98	112	108
6042	7935	9877	F	1	4	68	2.7	2	2	10.93	11.38	10.91	11.35	19	92	67	72	75	98	65	73	88
6099	7936	9878	F	1	5	123	87	94	0	10.03	10.5	10	10.44	9	109	102	87	139	117	101	86	129
6100	7936	9878	M	1	3	87	9	19	0	10.6	11.03	10.53	10.98	1	100	112	106	115	99	103	108	116
6101	7936	9878	F	1	3	84	32	14	0	10.94	11.39	11	11.39	0	97	86	102	99	93	83	97	107
6102	7936	9878	F	1	6	102	58	55	0	10.91	11.38	10.97	11.36	10.5	130	87	106	107	113	86	104	106
6103	7936	9878	M	1	4	80	18	9	0	10.27	10.72	10.32	10.71	6	101	88	81	101	97	89	94	105
6075	7937	9878	F	1	3	108	70	70	2	10.76	11.23	10.73	11.17	9	108	80	84	87	101	84	86	92
6076	7937	9878	F	1	2	100	32	50	2	10.76	11.24	10.74	11.18	3	101	95	101	101	101	98	124	100
6077	7937	9878	M	1	4	75	37	5	2	10.25	10.72	10.23	10.67	10.5	85	81	88	85	90	66	82	100
6078	7937	9878	M	1	2	104	68	61	2	10.73	11.19	10.7	11.13	16	101	87	92	104	106	83	93
6079	7937	9878	F	1	4	91	18	27	2	10.48	10.91	10.45	10.88	23	109	73	89	81	104	65	90	85
6080	7937	9878	F	1	3	100	37	50	2	10.31	10.74	10.28	10.71	5.5	93	73	82	97	92	76	87	91
6153	7938	9879	F	1	4	106	50	66	1	10.78	11.22	10.8	11.23	6	103	75	78	93	100	71	77	87
6154	7938	9879	F	1	4	125	93	95	1	10.44	10.85	10.44	10.86	4	107	103	86	110	105	107	93	117
6155	7938	9879	F	1	4	107	55	68	1		10.4	9.99	10.41	9.5	97	87	84	97	100	79	76	103
6156	7938	9879	M	1	2	100	27	50	1	10.38	10.82	10.4	10.82	8.5	99	97	104	100	96	94	97	107
6157	7938	9879	M	1	2	90	16	25	1	10.58	11.02	10.6	11.06	2	104	108	93	114	110	100	82	106
6158	7938	9879	M	1	3	117	79	87	1	10.34	10.81	10.36	10.79	4	114	84	86	112	116	90	95	106
6159	7938	9879	F	1	3	116	70	86	1	10.48	10.93	10.5	10.93	7	95	80	84	107	95	90	82	110
6160	7938	9879	F	1	3	97	42	42	1	10.49	10.95	10.51	10.94	11	88	74	82	95	88	95	81	89
6161	7939	9879	M	1	3	110	61	75	1	10.13	10.6	10.15	10.58	6	111	72	83	90	107	72	83	109
6162	7939	9879	F	1	2	107	82	68	1	10.81	11.27	10.81	11.26	5.5	97	96	96	99	95	89	101	102
6163	7939	9879	F	1	9	114	87	82	1	10.72	11.16	10.73	11.16	5	133	107	105	113	131	110	107	113
6164	7939	9879	F	1	3	90	39	25	1	10.44	10.89	10.46	10.89	7	100	86	86	95	99	74	87	101
6165	7939	9879	F	1	4	107	68	68	1	10.82	11.28	10.84	11.27	9	108	83	84	96	106	87	89	103
6166	7939	9879	M	1	3	111	66	77	1	10.48	10.91	10.57	10.91	7	97	95	103	109	96	109	104	118
6167	7939	9879	M	1	8	127	93	96	1	10.14	10.56	10.16	10.57	10	116	93	103	136	120	111	98	133
6168	7939	9879	F	1	4	117	77	87	1	10.1	10.52	10.12	10.53	6	98	83	94	90	97	94	100	97
6009	7940	9880	M	1	3	94	45	34	0	10.07	10.5	10.06	10.5	2	85	78	85	96	84	89	83	95
6010	7940	9880	M	1	2	94	30	34	0	10.2	10.64	10.2	10.64	1.5	85	60	75	95	76	81	77	83
6011	7940	9880	F	1	3	96	27	39	0	10.32	10.75	10.32	10.75	3	90	91	77	94	87	87	77	94
6012	7940	9880	M	1	4	107	55	68	0	10.11	10.54	10.11	10.55	9	98	74	83	99	95	62	80	93
6013	7940	9880	F	1	4	119	87	90	0	10.32	10.75	10.32	10.76	9	106	80	84	94	113	73	73	100
6014	7940	9880	M	1	2	80	21	9	0	10.06	10.5	10.06	10.5	4	68	70	76	69	69	62	75	74
6015	7940	9880	F	1	5	111	75	77	0	10.74	11.18	10.74	11.18	8	107	87	81	111	108	84	83	94
6043	7941	9881	F	1	4	82	16	12	1	10.93	11.36	10.94	11.37		77	75	85	84	83	72	78	90
6044	7941	9881	F	1	3	105	50	63	1	10.55	10.98	10.56	10.99		99	96	80	102	119	89	78	98
6045	7941	9881	F	1	4	89	61	23	1	10.46	10.9	10.48	10.9		90	79	83	111	96	86	86	102
6046	7941	9881	M	1	4	104	27	61	1	10.53	10.96	10.54	10.96		93	82	89	99	95	78	91	114
6047	7941	9881	M	1	6	102	32	55	1	10.19	10.63	10.21	10.63		86	77	74	93	88	70	73	89
6048	7941	9881	F	1	3	101	23	53	1	10.32	10.75	10.33	10.76		100	80	87	88	99	87	85	97
6049	7941	9881	F	1	3	112	32	79	1	10.52	10.95	10.53	10.96		99	78	76	86	99	75	75	93
6050	7941	9881	M	1	4	86	37	18	1	10.16	10.61	10.17	10.61		111	107	95	114	112	95	97	124
6051	7941	9881	F	1	3	111	58	77	1	10.17	10.61	10.19	10.61		107	92	86	109	99	88	93	94
6052	7941	9881	F	1	3	111	82	77	1	10.77	11.2	10.78	11.21		94	76	82	91	99	77	83	101
6053	7941	9881	M	1	4	97	12	42	1	10.03	10.46	10.04	10.47		90	87	82	103	94	79	103	96
6111	7942	9881	M	1	3	83	21	13	2	10.09	10.53	10.1	10.51	7	76	81	90	91	81	81	87	95
6112	7942	9881	M	1	3	84	10	14	2	10.15	10.59	10.17	10.58	7	95	89	79	93	94	75	93	93
6113	7942	9881	M	1	3	74	25	4	2	10.16	10.6	10.18	10.58	3	79	74	82	95	82	75	79	90
6114	7942	9881	M	1	5	102	63	55	2	10.26	10.7	10.28	10.68	6.5	104	82	86	89	103	86	82	92
6115	7942	9881	F	1	5	105	70	37	2	10.53	10.98	10.55	10.96	3	100	85	83	95	99	81	82	95
6116	7942	9881	M	1	4	107	66	68	2	10.14	10.55	10.14	10.55	20	118	92	93	102	108	78	93	109
6117	7942	9881	M	1	2	84	16	14	2	10.39	10.8	10.39	10.79	4	89	49	73	73	91	77	69	91
6118	7942	9881	M	1	2	93	19	32	2	9.99	10.4	10.05	10.4	1.5	107	88	85	87	106	92	83	89
6000	7943	9882	F	1	4	92	23	30	1	10.15	10.58	10.12	10.55	8	94	85	82	78	95	78	81	82
6001	7943	9882	M	1	4	109	45	73	1	9.99	10.43	9.97	10.39	6	107	117	124	145	107	112	126	142
6002	7943	9882	M	1	5	77	39	6	1	10.75	11.19	10.73	11.16	2.5	91	73	80	104	86	94	77	97
6003	7943	9882	F	1	3	113	90	81	1	10.59	11.03	10.57	11	2	106	88	87	105	105	92	88	98
6004	7943	9882	M	1	3	109	77	73	1	10.28	10.72	10.26	10.68	8	108	95	98	117	117	84	103	100
6005	7943	9882	F	1	3	100	61	50	1	10.36	10.8	10.34	10.77	2.5	75	72	80	94	79	76	79	99
6006	7943	9882	M	1	4	113	94	81	1	10.45	10.89	10.42	10.85	2.5	113	97	79	111	110	96	85	105
6007	7943	9882	M	1	4	104	61	61	1	10.42	10.86	10.4	10.82	1	124	90	81	114	127	93	83	110
6008	7943	9882	F	1	4	121	66	92	1	10.78	11.22	10.76	11.18	15	123	97	92	108	123	91	89	103
6129	7944	9883	M	1	2	103	81	58	0	10.33	10.78	10.34	10.77	5	116	98	111	120	121	106	123	143
6130	7944	9883	M	1	3	86	37	18	0	10.79	11.24	10.83	11.23	5	94	77	81	95	97	84	87	98
6131	7944	9883	F	1	4	98	45	45	0	10.65	11.1	10.66	11.09	25	114	103	95	105	113	109	102	115
6132	7944	9883	M	1	3	116	92	86	0	10.61	11.05	10.61	11.04	13	106	91	74	82	107	84	79	94
6133	7944	9883	M	1	1	80	32	9	0		11.04		11.03	6.5	84	45	51	78	86	42	56	75
6134	7944	9883	M	1	3	105	55	63	0	10.49	10.94	10.5	10.93	11	73	84	77	89	74	102	97	98
6135	7944	9883	F	1	3	105	50	63	0	10.18	10.63	10.22	10.62	23	102	92	90	101	105	98	93	108
6136	7944	9883	M	1	2	115	86	84	0	10.32	10.74	10.31	10.75	27	96	81	68	95	98	78	69	89
6137	7944	9883	F	1	2	99	77	47	0	10.9	11.24	10.81	11.25	11	122	96	82	99	118	93	88	98
6138	7944	9883	M	1	4	96	10	39	0	10.06	10.45	10.03	10.47	3.5	110	99	92	102	106	92	96	102
6119	7945	9883	F	1	4	111	53	77	2	10.95	11.35	10.94	11.35		105	92	92	98	104	92	103	116
6120	7945	9883	F	1	4	97	42	42	2	10.9	11.31	10.9	11.3		102	93	99	99	103	105	101	97
6121	7945	9883	M	1	6	105	32	63	2	10.19	10.6	10.25	10.59		108	125	108	139	105	112	112	143
6122	7945	9883	M	1	7	96	45	39	2	10.82	11.27	10.92	11.26		100	96	88	109	99	90	98	103
6123	7945	9883	M	1	4	103	47	58	2	10.83	11.26	10.83	11.23		102	99	83	116	105	93	82	113
6124	7945	9883	F	1	8	123	82	94	2	10.41	10.87	10.44	10.84		117	111	98	137	116	103	105	136
6125	7945	9883	F	1	6	88	53	21	2	10.29	10.71	10.28	10.69		97	90	92	84	98	87	93	93
6126	7945	9883	F	1	3	102	55	55	2	10.27	10.7	10.25	10.7		101	93	100	93	96	100	98	94
6127	7945	9883	M	1	3	117	75	87	2	10.2	10.65	10.24	10.64		109	108	98	115	112	112	115	140
6128	7945	9883	F	1	3	88	25	21	2	10.62	11.07	10.63	11.06		91	88	89	94	92	84	94	105
6139	7946	9884	F	1	7	110	23	75	0	10.74	11.13	10.71	11.14	7	95	101	111	136	98	113	108	126
6140	7946	9884	F	1	3	69	9	2	0	10.21	10.61	10.17	10.61	12	84	63	90	68	86	90	77	81
6141	7946	9884	M	1	4	93	53	32	0	10.79	11.21	10.78	11.22	0	103	74	71	89	103	86	75	102
6142	7946	9884	F	1	4	88	16	21	0	10.36	10.75	10.33	10.76	4.5	82	76	59	94	85	77	87	89
6143	7946	9884	F	1	5	116	87	86	0	10.61	11.02	10.59	11.03	20.5	120	96	90	110	121	110	87	101
6144	7946	9884	M	1	3	102	47	55	0	10.05	10.46	10.04	10.48	4.5	86	69	73	79	78	65	67	91
6145	7946	9884	F	1	2	116	70	86	0	10.63	11.05	10.62	11.05	11	67	91	75	91	78	90	82	107
6146	7946	9884	F	1	2	90	19	25	0	10.24	10.69	10.23	10.67	4	99	78	84	95	97	82	89	102
6147	7946	9884	F	1	5	122	91	93	0	10.93	11.34	10.92	11.36	13	105	109	98	123	109	112	102	126
6148	7946	9884	F	1	3	89	30	23	0	11.1	11.52	11.09	11.52	14	84	66	65	82	81	66	67	86
6149	7946	9884	M	1	4	98	61	45	0	10.87	11.29	10.85	11.29	5.5	94	91	92	98	109	84	93	108
6150	7946	9884	M	1	2	84	47	14	0	9.97	10.41	9.99	10.42	9	100	82	88	90	102	79	85	99
6151	7946	9884	F	1	2	65	13	1	0	10.53	10.96	10.55	10.97	0	97	62	87	79	102	71	93	99
6152	7946	9884	M	1	6	101	55	53	0	9.95	10.39	9.97	10.4	10	112	90	77	103	120	94	84	103
6057	7947	9885	F	1	3	75	25	5	2	10.58	11.03	10.61	11.05		98	83	89	88	98	80	83	108
6058	7947	9885	M	1	2	72	16	3	2	11	11.35	10.93	11.36		74	71	71	86	75	72	76	84
6059	7947	9885	F	1	4	94	42	34	2	10.25	10.7	10.28	10.71		71	74	80	84	98	67	80	95
6060	7947	9885	M	1	4	83	34	13	2	10.61	10.95	10.53	10.97		94	70	69		97	63	72	92
6061	7947	9885	M	1	3	103	18	58	2	10.23	10.68	10.22	10.65		112	78	88	102	111	86	94	110
6062	7947	9885	F	1	2	102	70	55	2	10.1	10.59	10.09	10.61		71	81	66	91	71	77	65	101
6063	7947	9885	M	1	3	91	34	27	2	10.53	11.02	10.52	11.04		99	81	75	95	98	79	75	96
16000	17929	19875	M	0	2	102	27	55	0	10.26	10.68	10.27	10.68	6	98	82	95	84	104	82	92	90
16001	17929	19875	M	0	2	98	27	45	0	10.64	11.07	10.69	11.11	11	73	85	87	95	75	81	90	101
16002	17929	19875	M	0	3	103	63	58	0	10.54	10.97	10.65	11.01	1	96	95	103	95	98	107	116	121
16003	17929	19875	M	0	2	96	39	39	0	10.71	11.14	10.83	11.18	1.5	99	98	87	98	100	81	94	101
16076	17930	19875	F	0	3				2					8	99	75	70	106	100	71	77	99
16077	17930	19875	F	0	4				2					7	94	62	71	73	91	66	68	85
16078	17930	19875	F	0	3				2	10.7	11.14	10.68	11.12	11	86	73	78	81	87	66	76	100
16079	17930	19875	F	0	4				2	10.41	10.85	10.4	10.84	9	96	79	85	109	100	75	82	87
16080	17930	19875	M	0	3				2	10.73	11.17	10.74	11.16	5	96	97	95	101	96	84	95	104
16004	17931	19876	M	0	3	96	21	39	0	10.41	10.85	10.47	10.89	5	86	65	78	92	94	77	81	92
16005	17931	19876	M	0	7	87	19	19	0	10.72	11.11	10.72	11.15	15.5	107	100	86	98	109	89	99	116
16006	17931	19876	M	0	5	94	45	34	0	10.54	10.97	10.64	11.01	19	112	91	74	108	118	91	71	99
16007	17931	19876	F	0	2	108	63	70	0	10.45	10.9	10.51	10.95	18	86	71	84	103	89	64	83	90
16008	17931	19876	F	0	3	66	3	1	0	10.81	11.23	10.84	11.27	7	71	61	65	71	70	43	61	64
16009	17931	19876	F	0	4	93	30	32	0	11.96	12.35	11.97	12.39	17	85	78	89	98	89	67	91	85
16010	17931	19876	F	0	4	89	27	23	0	10.58	11.01	10.62	11.04	19	81	79	81	87	83	82	84	82
16011	17931	19876	F	0	4	93	32	32	0	10.9	11.32	10.93	11.36	8	74	76	70	82	71	57	69	78
16013	17931	19876	M	0	2	80	8	9	0		10.81	10.43	10.85	3	100	81	83	95	100	78	79	105
16014	17931	19876	M	0	2	94	55	34	0		10.45	10.12	10.48	5	66	86	81	93	71	79	82	97
16015	17931	19876	M	0	5	97	47	42	0		11.13	10.8	11.14	13	92	95	94	90	97	95	102	112
16016	17931	19876	M	0	3	104	68	61	0	10.38	10.83	10.5	10.84	7.5	107	86	69	87	104	79	79	93
16017	17931	19876	F	0	4	89	10	23	0	10.1	10.55	10.21	10.55	9.5	100	71	95	99	98	93	95	114
16043	17932	19876	F	0	3	107	58	68	1	9.94	10.38	10.05	10.42	12	109	86	90	111	110	89	82	106
16044	17932	19876	F	0	6	103	37	58	1	9.95	10.37	10.04	10.41	2	114	93	84	107	110	93	77	103
16045	17932	19876	M	0	4	99	32	47	1	10.24	10.62	10.29	10.66	5.5	96	45	78	61	95	65	79	88
16046	17932	19876	M	0	9	110	66	75	1	10.32	10.7	10.37	10.74	7.5	122	106	115	132	120	94	111	126
16047	17932	19876	F	0	6	134	95	99	1					6	117	98	84	113	124	83	80	107
16048	17932	19876	M	0	4	87	32	19	1	10.64	11.06	10.74	11.1		112	91	117	101	106	85	107	98
16049	17932	19876	F	0	2	97	37	42	1	10.8	11.24	10.91	11.28	0.5	96	94	99	112	101	95	91	112
16050	17932	19876	F	0	3				1	9.91	10.36	10.04	10.39	14.5
16051	17932	19876	F	0	3	94	23	34	1	10.62	11.01	10.68	11.04	15	111	102	93	98	111	91	97	94
16052	17932	19876	F	0	5	102	45	55	1	10.58	11	10.67	11.04	17	118	97	104	100	110	80	106	103
16053	17932	19876	M	0	5	121	84	92	1	10.23	10.62	10.32	10.65	5	112	110	98	116	107	80	95	123
16054	17932	19876	F	0	5	97	32	42	1	10.25	10.63	10.31	10.67	2	96	88	95	105	109	67	92	98
16055	17932	19876	F	0	4	91	4	27	1	10.72	11.11	10.79	11.15	5.5	113	74	93	98	113	78	94	96
16056	17932	19876	F	0	6	104	37	61	1	10.23	10.64	10.32	10.68	2.5	100	98	90	105	111	95	90	98
16057	17932	19876	F	0	7	123	87	94	1	10.58	11.02	10.7	11.06	9	108	91	92	120	109	107	78
16058	17932	19876	F	0	4	99	39	47	1	10.82	11.25	10.91	11.28	4.5	109	84	89	107	99	91	86	92
16059	17932	19876	M	0	4	95	16	37	1	10.39	10.83	10.51	10.87	5	111	110	106	112	109	102	109	109
16060	17932	19876	F	0	7	132	98	98	1	10.64	11.02	10.7	11.06	28	130	114	92	127	119	89	82	119
16061	17932	19876	M	0	2	118	77	88	1	10.7	11.14	10.82	11.18	7	114	90	76	103	118	87	84	93
16062	17932	19876	M	0	6	125	79	95	1	10.29	10.73	10.4	10.77	10.5	114	79	91	90	114	83	81	111
16063	17932	19876	M	0	3	120	86	91	1	10.95	11.4	11.07	11.44	17	107	88	88	115	119	92	89	116
16064	17932	19876	M	0	2	111	53	77	1	10.6	10.98	10.65	11.02	2.5	94	106	107	131	99	101	107	118
16065	17932	19876	F	0	4	77	45	6	1	10.66	11.12	10.62	11.1	5.5	95	98	92	101	95	101	80	103
16066	17932	19876	F	0	4	75	2	5	1	10.45	10.91	10.41	10.89	1.5	79	86	101	87	79	99	95	90
16067	17932	19876	F	0	3	98	37	45	1	10.08	10.52	10.04	10.48	4	95	85	90	98	98	92	84	89
16018	17934	19877	M	0	3	81	19	10	0	10.48	10.93	10.6	10.94	17	101	72	87	87	98	70	80	94
16019	17934	19877	M	0	4	110	58	75	0	10.54	10.99	10.66	11	12	97	94	84	103	108	79	82	113
16020	17934	19877	M	0	3	85	4	16	0	10.8	11.25	10.92	11.25	2.5	86	89	83	96	91	93	80	109
16021	17934	19877	M	0	6	113	45	81	0	10.82	11.27	10.94	11.28	5	98	86	83	102	100	86	79	105
16022	17934	19877	F	0	5	115	58	84	0	9.96	10.41	10.07	10.41	5	113	93	101	106	109	102	98	108
16023	17934	19877	M	0	4	97	45	42	0	10.78	11.23	10.88	11.23	5.5	108	60	91	100	102	80	92	106
16024	17934	19877	F	0	5	101	68	53	0	10.77	11.22	10.87	11.22	6.5	122	104	103	110	133	94	108	99
16025	17934	19877	F	0	4	103	70	58	0	10.84	11.3	10.95	11.3	11.5	108	87	102	115	113	93	94	114
16026	17934	19877	F	0	4	96	32	39	0	10.5	10.96	10.63	10.96	6.5	88	90	98	103	87	90	91	107
16027	17934	19877	M	0	7	110	75	75	0	10.89	11.35	11	11.35	1	120	73	93	96	120	76	88	103
16028	17934	19877	F	0	4	107	58	68	0	10.8	11.24	10.78	11.22	6	108	90	78	96	105	76	97	110
16029	17934	19877	M	0	3	100	70	50	0	10.25	10.71	10.23	10.67	5.5	100	82	78	98	99	71	76	96
16030	17934	19877	M	0	4	111	45	77	0	10.43	10.87	10.42	10.85	5.5	93	96	102	106	94	103	104	110
16081	17935	19878	F	0	2	87	13	19	1	10.01	10.45	9.99	10.43	1.5	89	77	71	94	92	66	71	91
16082	17935	19878	M	0	3	106	82	66	1	10.89	11.34	10.88	11.32	8.5	92	83	79	103	92	83	79	99
16083	17935	19878	F	0	7	121	92	92	1	10.16	10.6	10.14	10.58	6	99	101	79	106	99	91	81	104
16084	17935	19878	F	0	2	102	25	55	1	10.54	10.98	10.53	10.96	22.5	101	87	102	112	102	79	97	107
16085	17935	19878	F	0	4	99	23	47	1	10.29	10.73	10.3	10.72	6	94	79	83	89	88	83	88	97
16086	17935	19878	F	0	4	109	84	73	1		11.33	10.93	11.32	2	107	77	84	113	108	62	83	101
16087	17935	19878	F	0	4	107	32	68	1	10.69	11.13	10.67	11.15	3	95	86	88	106	92	85	96	102
16088	17935	19878	F	0	3	108	77	70	1	10.61	11.05	10.59	11.03	15	107	81	80	91	106	80	85	103
16089	17935	19878	M	0	5	105	39	63	1	10.25	10.69	10.25	10.67	1.5	83				84	86	99	109
16031	17936	19879	F	0	2	99	30	47	2	10.84	11.28	10.82	11.26	5.5	81	75	87	112	85	76	79	91
16032	17936	19879	M	0	3	89	32	23	2	10.79	11.23	10.77	11.21	9	94	84	75	88	93	77	75	108
16033	17936	19879	F	0	5	94	45	34	2	10.74	11.18	10.72	11.16	20.5	109	90	105	107	112	93	101	110
16034	17936	19879	M	0	3	84	18	14	2	10.68	11.12	10.66	11.1	2.5	90	76	76	91	89	69	84	97
16035	17936	19879	F	0	2	88	9	21	2	10.32	10.76	10.3	10.74	2	84	76	76	97	83	97	90	93
16036	17936	19879	F	0	2	103	39	58	2	10.68	11.16	10.67	11.1	6	94	84	80	85	92	80	76	92
16037	17936	19879	M	0	4	89	37	23	2	10.12	10.56	10.1	10.54	2	90	73	74	92	91	81	77	101
16038	17936	19879	M	0	3	99	25	47	2	10.07	10.55	10.05	10.49	3	97	87	75	91	93	76	76	94
16039	17936	19879	M	0	6	99	47	47	2	10.35	10.83	10.33	10.77	28	125	84	80	112	111	80	82	94
16040	17936	19879	F	0	3	72	16	3	2	10.08	10.53	10.21	10.57	5	94	86	72	66	93	74	73	59
16041	17937	19879	M	0	4	96	37	39	2	10.09	10.54	10.21	10.57	5.5	95	78	76	77	97	89	81	90
16042	17937	19879	M	0	3	110	58	75	2	10.82	11.26	10.94	11.3	3	111	91	77	108	116	86	70	110
16068	17938	19880	F	0	4	93	32	32	3	10.45	10.88	10.41	10.85	16	87	77	71	73	84	70	66	69
16069	17938	19880	M	0	4	102	58	55	3	10.34	10.78	10.3	10.74	5	93	90	98	111	96	79	97	122
16070	17938	19880	F	0	4	119	95	90	3	10.55	10.98	10.51	10.95	7.5	115	93	94	122	114	93	98	120
16071	17938	19880	F	0	4	85	12	16	3	10.7	11.14	10.66	11.1	7	89	58	77	66	88	55	75	64
16072	17938	19880	M	0	4	105	37	63	3	9.98	10.42	9.95	10.38	8	100	76	81	93	93	73	73	93
16073	17938	19880	M	0	4	86	21	18	3					4	78	86	80	90	91	74	78	72
16074	17938	19880	M	0	3	102	68	55	3					4.5	104	95	96	112	99	105	86	101
16075	17938	19880	M	0	4	107	37	68	3					3	107	83	81	114	105	93	79	122
16090	17939	19878	M	0	5	122	88	93	2	10.73	11.17	10.76	11.22		125	98	88	104	125	98	94	114
16091	17939	19878	M	0	4	91	47	27	2	10.06	10.5	10.07	10.56		85	74	75	80	80	71	74	92
16092	17939	19878	M	0	2	97	88	42	2	10.12	10.56	10.1	10.54		96	77	94	92	104	82	80	95
16093	17939	19878	M	0	3	89	16	23	2	10.72	11.17	10.73	11.19		95	94	102	100	98	97	102	92
16094	17939	19878	M	0	4	100	23	50	2	10.31	10.66	10.2	10.64		94	89	91	96	99	100	95	124
16095	17939	19878	M	0	5	110	53	75	2	10.89	11.33	10.87	11.31		100	86	84	107	110	92	81	124
16096	17939	19878	F	0	6	112	66	79	2			10.42	10.84		116	101	97	127	106	101	104	129
16097	17939	19878	F	0	5	120	90	91	2	10.07	10.44	10	10.42		118	120	99	127	119	110	104	134
16098	17939	19878	M	0	3	109	39	73	2	10.76	11.12	10.68	11.1		99	96	96	117	103	100	98	136
16100	17941	19882	F	0	4	86	21	18	2	10.53	10.9	10.46	10.88	21	98	86	82	99	95	79	84	107
16101	17941	19882	M	0	4	113	53	81	2	10.47	10.91	10.55	10.89	11	97	87	77	108	98	95	71	101
16102	17941	19882	F	0	5	103	58	58	2	10.94	11.3	10.87	11.29	4	99	82	79	92	103	79	77	103
16103	17941	19882	F	0	4	86	18	18	2	10.83	11.19	10.76	11.18	7	105	78	80	99	108	75	75	93
16104	17941	19882	F	0	5	100	27	50	2					9	103	100	77	99	106	79	78	86
16105	17941	19882	F	0	4	107	47	68	2					6	108	96	92	93	87	90	89	110

## Sheet: Pilot Study Data Dictionary
Variable	Description
Child_ID	Child ID
Teacher_ID	Teacher ID
School_ID	School ID
Gender	Gender: M=Male; F=Female
Curriculum	Randomly-assigned curriculum
WorkMem	Working memory, non-word letter span backward score
IQcomp	KBIT IQ composite of verbal and nonverbal standard score
VerbalIQ	KBIT verbal IQ standard score
NonVerbalIQ	KBIT nonverbal IQ standard score
Grade_type	Composition of the class 0=4/5 split; 1=5; 2=5/6 split; 3=4/5/6 split
MathAgePre	Age at time of Pre Math testing
MathAgePost	Age at time of Post Math testing
ReadAgePre	Age at time of Pre Reading testing
ReadAgePost	Age at time of Post Reading testing
Days_Absent	Days Absent during study year
LetterWdID_pre	WJ3 Letter Word ID standard score pre
Cal_pre	WJ3 calculation standard score pre
MathFlu_pre	WJ3 math fluency standard score pre
QuantCon_pre	WJ3 quantitative concepts standard score pre
LettterWdID_post	WJ3 Letter Word ID standard score post
Cal_post	WJ3 calculation standard score post
MathFlu_post	WJ3 math fluency standard score post
QuantCon_post	WJ3 quantitative concepts standard score post
