# Supplementary material for: A cluster-randomized controlled trial of the effectiveness of the JUMP Math program of math instruction for improving elementary math achievement
Source: PLoS One. 2019 Oct 30;14(10):e0223049. doi: 10.1371/journal.pone.0223049 (PMC6821143; doi:10.1371/journal.pone.0223049)
Supplement: S2 Dataset — (XLSX) [file pone.0223049.s003.xlsx]

## Sheet: Scale-Up Study Data
Student_ID	Teacher_ID	School_ID	Grade	Grade_Type	AgeSep1	Sex	IQcomp	NonVerbalIQ	VerbalIQ	WorkMem	ProcSpeedNum	ProcSpeedLett	DaysAbsent	Curriculum	TimePeriod	InterTestInterval	BroadMath_1	BroadRead_1	AppProb_1	Cal_1	MathFlu_1	CBC_1	PSP_1	BroadMath_change	BroadRead_change	AppProb_change	Cal_change	MathFlu_change	CBC_change	PSP_change	Teacher_Sex	YearOfPart	Highest_level_Ed	Highest_MathEd	Yrs_TeachExp	Math_instruct_Freq_Wk	Math_instruct_Time_Wk	Rate_Experience_End	Instructional_Approach	Alignment	Coder_Confidence	Review_percent	DirectInstruct_percent	Facilitate_percent	Organize_percent	Circulate_percent	Available_percent	Distracted_percent	IndivWork_percent
8433	12528	23966	2	0	7.49624	1	102	102	100	3	125	116	5.5	0	1	195	109	116	113	100	101	34.1463	22	-6	-2	-7	-7	10	-11.6463	0	1	1	2	2	3	5	225	6	1	5	4	0	65	0	1	15	19	0	34
8433	12528	23966	2	0	7.49624	1	102	102	100	3	125	116	5.5	0	2	126	109	116	113	100	101	34.1463	22	-3	-3	-4	4	-10	-11.1364	8	1	1	2	2	3	5	225	6	1	5	4	0	65	0	1	15	19	0	34
8433	12653	23966	3	0	7.49624	1	102	102	100	3	125	116	1	0	3	201	109	116	113	100	101	34.1463	22	0	-4	5	-5	-2	24.1919	-4	1	2	3	2	3	5	300	8	0	6	5	0	3	75	0	19	3	0	0
8434	12528	23966	2	0	6.85284	1	97	84	111	2	84	100	9	0	1	195	106	108	103	109	105	29.2683	20	-9	0	-2	-11	-30	-1.76829	-4	1	1	2	2	3	5	225	6	1	5	4	0	65	0	1	15	19	0	34
8434	12528	23966	2	0	6.85284	1	97	84	111	2	84	100	9	0	2	127	106	108	103	109	105	29.2683	20	-1	-9	-1	-5	23	-11.9444	-6	1	1	2	2	3	5	225	6	1	5	4	0	65	0	1	15	19	0	34
8434	12652	23966	3	0	6.85284	1	97	84	111	2	84	100	7	0	3	175	106	108	103	109	105	29.2683	20	-5	-3	-7	-3	-6	4.89899	6	1	2	2	2	3	5	300	5	0	5	4	0	16	24	21	39	0	0	0
8435	12528	23966	2	0	7.52361	1	89	76	105	5	95	96	6	0	1	195	102	110	109	100	73	19.5122	12	-14	-2	-17	-8	-5	2.9878	16	1	1	2	2	3	5	225	6	1	5	4	0	65	0	1	15	19	0	34
8435	12528	23966	2	0	7.52361	1	89	76	105	5	95	96	6	0	2	128	102	110	109	100	73	19.5122	12	-1	2	5	-9	3	-6.59091	-14	1	1	2	2	3	5	225	6	1	5	4	0	65	0	1	15	19	0	34
8435	12653	23966	3	0	7.52361	1	89	76	105	5	95	96	0	0	3	199	102	110	109	100	73	19.5122	12	-1	-2	-3	1	2	-0.353535	12	1	2	3	2	3	5	300	8	0	6	5	0	3	75	0	19	3	0	0
8436	12528	23966	2	0	6.75428	1	94	83	106	2	92	91	2.5	0	1	195	110	107	121	95	93	26.8293	16	9	1	4	7	15	3.17073	12	1	1	2	2	3	5	225	6	1	5	4	0	65	0	1	15	19	0	34
8436	12528	23966	2	0	6.75428	1	94	83	106	2	92	91	2.5	0	2	127	110	107	121	95	93	26.8293	16	-20	1	-24	-4	-10	-18.8889	-10	1	1	2	2	3	5	225	6	1	5	4	0	65	0	1	15	19	0	34
8436	12652	23966	3	0	6.75428	1	94	83	106	2	92	91	4	0	3	175	110	107	121	95	93	26.8293	16	1	-3	-3	7	-1	22.9798	8	1	2	2	2	3	5	300	5	0	5	4	0	16	24	21	39	0	0	0
8437	12528	23966	2	0	6.81451	0	80	81	85	3	97	114	4.5	0	1	195	93	112	85	103	107	7.31707	8	9	2	11	8	-2	32.6829	6	1	1	2	2	3	5	225	6	1	5	4	0	65	0	1	15	19	0	34
8437	12528	23966	2	0	6.81451	0	80	81	85	3	97	114	4.5	0	2	127	93	112	85	103	107	7.31707	8	-5	-4	5	-17	-10	-33.3333	-2	1	1	2	2	3	5	225	6	1	5	4	0	65	0	1	15	19	0	34
8437	12652	23966	3	0	6.81451	0	80	81	85	3	97	114	4	0	3	176	93	112	85	103	107	7.31707	8	1	-1	-7	10	5	20.6061	-2	1	2	2	2	3	5	300	5	0	5	4	0	16	24	21	39	0	0	0
8438	12528	23966	2	0	6.85284	1	91	84	101	3	93	100	7	0	1	195	102	107	96	109	103	36.5854	10	1	3	16	-15	-15	-11.5854	16	1	1	2	2	3	5	225	6	1	5	4	0	65	0	1	15	19	0	34
8438	12528	23966	2	0	6.85284	1	91	84	101	3	93	100	7	0	2	127	102	107	96	109	103	36.5854	10	-2	-4	-5	3	-1	-9.09091	-12	1	1	2	2	3	5	225	6	1	5	4	0	65	0	1	15	19	0	34
8438	12653	23966	3	0	6.85284	1	91	84	101	3	93	100	4.5	0	3	200	102	107	96	109	103	36.5854	10	-2	0	-2	0	-1	8.53535	4	1	2	3	2	3	5	300	8	0	6	5	0	3	75	0	19	3	0	0
8439	12528	23966	2	0	7.03628	1	109	96	118	2	112	110	24.5	0	1	195	103	112	100	106	102	29.2683	16	-20	-1	-10	-25	-19	-6.76829	4	1	1	2	2	3	5	225	6	1	5	4	0	65	0	1	15	19	0	34
8439	12528	23966	2	0	7.03628	1	109	96	118	2	112	110	24.5	0	2	126	103	112	100	106	102	29.2683	16	14	-2	14	9	10	-22.5	-2	1	1	2	2	3	5	225	6	1	5	4	0	65	0	1	15	19	0	34
8439	12652	23966	3	0	7.03628	1	109	96	118	2	112	110	17.5	0	3	176	103	112	100	106	102	29.2683	16	4	2	0	6	8	15.9091	4	1	2	2	2	3	5	300	5	0	5	4	0	16	24	21	39	0	0	0
8440	12528	23966	2	0	7.62765	0	98	79	117	4	89	95	16.5	0	1	181	112	104	115	103	101	31.7073	28	-1	1	2	-4	-2	23.2927	-8	1	1	2	2	3	5	225	6	1	5	4	0	65	0	1	15	19	0	34
8440	12528	23966	2	0	7.62765	0	98	79	117	4	89	95	16.5	0	2	128	112	104	115	103	101	31.7073	28	-11	-3	-7	-5	-18	-39.4444	-4	1	1	2	2	3	5	225	6	1	5	4	0	65	0	1	15	19	0	34
8440	12652	23966	3	0	7.62765	0	98	79	117	4	89	95	4.5	0	3	175	112	104	115	103	101	31.7073	28	11	-4	7	5	22	11.7172	-2	1	2	2	2	3	5	300	5	0	5	4	0	16	24	21	39	0	0	0
8441	12528	23966	2	0	7.65777	1	81	76	91	3	139	122	13	0	1	195	116	111	114	107	122	53.6585	10	-1	0	3	-8	-4	-8.65854	8	1	1	2	2	3	5	225	6	1	5	4	0	65	0	1	15	19	0	34
8441	12528	23966	2	0	7.65777	1	81	76	91	3	139	122	13	0	2	128	116	111	114	107	122	53.6585	10	-3	5	-3	-2	-3	-29.0909	6	1	1	2	2	3	5	225	6	1	5	4	0	65	0	1	15	19	0	34
8441	12654	23966	3	1	7.65777	1	81	76	91	3	139	122	12.5	0	3	199	116	111	114	107	122	53.6585	10	-5	-8	-9	4	-2	48.5354	0	1	2	2	2	3	4	300	8	0	6	4	0	18	50	2	30	0	0	0
8442	12528	23966	2	0	6.7707	1	97	83	112	2	109	126	1.5	0	1	195	92	103	89	95	110	19.5122	10	-4	1	4	-9	-21	5.4878	2	1	1	2	2	3	5	225	6	1	5	4	0	65	0	1	15	19	0	34
8442	12528	23966	2	0	6.7707	1	97	83	112	2	109	126	1.5	0	2	127	92	103	89	95	110	19.5122	10	0	-5	-1	-1	5	-20.5556	-2	1	1	2	2	3	5	225	6	1	5	4	0	65	0	1	15	19	0	34
8442	12652	23966	3	0	6.7707	1	97	83	112	2	109	126	4	0	3	175	92	103	89	95	110	19.5122	10	-7	2	-9	-4	-4	13.7374	2	1	2	2	2	3	5	300	5	0	5	4	0	16	24	21	39	0	0	0
8443	12528	23966	2	0	7.05544	1	112	120	100	3	104	106	16.5	0	1	195	58	91	80	49	75	2.43902	12	20	8	-1	37	0	5.06098	4	1	1	2	2	3	5	225	6	1	5	4	0	65	0	1	15	19	0	34
8443	12528	23966	2	0	7.05544	1	112	120	100	3	104	106	16.5	0	2	127	58	91	80	49	75	2.43902	12	-10	-8	1	-25	-5	-0.681818	-6	1	1	2	2	3	5	225	6	1	5	4	0	65	0	1	15	19	0	34
8443	12653	23966	3	0	7.05544	1	112	120	100	3	104	106	10	0	3	200	58	91	80	49	75	2.43902	12	5	3	5	5	1	8.73737	6	1	2	3	2	3	5	300	8	0	6	5	0	3	75	0	19	3	0	0
8444	12528	23966	2	0	7.32101	1	94	71	110	3	107	106		0	1	181	98	103	101	94	100	9.7561	12	0	2	1	2	-7	32.7439	10	1	1	2	2	3	5	225	6	1	5	4	0	65	0	1	15	19	0	34
8444	12528	23966	2	0	7.32101	1	94	71	110	3	107	106		0	2		98	103	101	94	100	9.7561	12								1	1	2	2	3	5	225	6	1	5	4	0	65	0	1	15	19	0	34
8444	12378	23945			7.32101	1	94	71	110	3	107	106		0	3		98	103	101	94	100	9.7561	12
8445	12528	23966	2	0	7.62491	1	93	82	106	3	102	106	8	0	1	195	89	97	92	89	90	19.5122	10	-3	5	2	-8	-10	7.9878	2	1	1	2	2	3	5	225	6	1	5	4	0	65	0	1	15	19	0	34
8445	12528	23966	2	0	7.62491	1	93	82	106	3	102	106	8	0	2	128	89	97	92	89	90	19.5122	10	-9	-9	-12	-4	0	-22.9545	-2	1	1	2	2	3	5	225	6	1	5	4	0	65	0	1	15	19	0	34
8445	12653	23966	3	0	7.62491	1	93	82	106	3	102	106	12.5	0	3	199	89	97	92	89	90	19.5122	10	1	0	6	-8	6	13.2323	0	1	2	3	2	3	5	300	8	0	6	5	0	3	75	0	19	3	0	0
8446	12528	23966	2	0	7.42779	0	81	82	85	0	119	119	1	0	1	195	77	79	80	82	80	19.5122	12	-9	8	-3	-21	2	2.9878	-2	1	1	2	2	3	5	225	6	1	5	4	0	65	0	1	15	19	0	34
8446	12528	23966	2	0	7.42779	0	81	82	85	0	119	119	1	0	2	127	77	79	80	82	80	19.5122	12	7	-2	12	1	-8	-15.8333	2	1	1	2	2	3	5	225	6	1	5	4	0	65	0	1	15	19	0	34
8446	12652	23966	3	0	7.42779	0	81	82	85	0	119	119	4	0	3	175	77	79	80	82	80	19.5122	12	21	0	10	32	22	4.69697	0	1	2	2	2	3	5	300	5	0	5	4	0	16	24	21	39	0	0	0
8447	12528	23966	2	0	7.12389	1	96	82	110	3	112	110	3.5	0	1	195	118	99	116	115	105	14.6341	16	-14	4	-8	-17	-5	5.36585	6	1	1	2	2	3	5	225	6	1	5	4	0	65	0	1	15	19	0	34
8447	12528	23966	2	0	7.12389	1	96	82	110	3	112	110	3.5	0	2	126	118	99	116	115	105	14.6341	16	-10	-7	-5	-14	-11	-11.1111	-12	1	1	2	2	3	5	225	6	1	5	4	0	65	0	1	15	19	0	34
8447	12652	23966	3	0	7.12389	1	96	82	110	3	112	110	6	0	3	177	118	99	116	115	105	14.6341	16	-2	2	-10	6	8	25.202	18	1	2	2	2	3	5	300	5	0	5	4	0	16	24	21	39	0	0	0
8448	12530	23966	5	0	10.1465	0	76	74	85	2	97	105	16	0	1	200	78	91	89	67	88	7.95455	12	1	1	8	-7	-6	8.71212	-2	1	1	3	1	3	4	240	7	0	5	4	3	7	48	3	30	9	0	9
8448	12530	23966	5	0	10.1465	0	76	74	85	2	97	105	16	0	2	128	78	91	89	67	88	7.95455	12	4	0	-2	10	4	-13.5739	-2	1	1	3	1	3	4	240	7	0	5	4	3	7	48	3	30	9	0	9
8448	12529	23966	6	-1	10.1465	0	76	74	85	2	97	105	14.5	0	3	194	78	91	89	67	88	7.95455	12	-4	2	-4	3	-12	-0.151607	-2	1	2	2	2	4	5	300	8	0	5	4	0	18	40	0	42	0	0	0
8449	12530	23966	5	0	10.6694	1	88	96	83	4	104	102	8.5	0	1	200	75	83	80	82	66	19.3182	18	15	5	19	8	10	0.919913	6	1	1	3	1	3	4	240	7	0	5	4	3	7	48	3	30	9	0	9
8449	12530	23966	5	0	10.6694	1	88	96	83	4	104	102	8.5	0	2	130	75	83	80	82	66	19.3182	18	-4	2	-6	-3	0	-0.650466	-20	1	1	3	1	3	4	240	7	0	5	4	3	7	48	3	30	9	0	9
8449	12529	23966	6	-1	10.6694	1	88	96	83	4	104	102	11	0	3	209	75	83	80	82	66	19.3182	18	-12	2	-6	-21	2	-1.94057	6	1	2	2	2	4	5	300	8	0	5	4	0	18	40	0	42	0	0	0
8450	12530	23966	5	0	10.4668	0	67	64	78	3	79	102	16	0	1	200	85	93	95	84	69	19.3182	10	2	2	-1	-3	23	4.49134	6	1	1	3	1	3	4	240	7	0	5	4	3	7	48	3	30	9	0	9
8450	12530	23966	5	0	10.4668	0	67	64	78	3	79	102	16	0	2	128	85	93	95	84	69	19.3182	10	1	0	2	1	-6	6.58263	-6	1	1	3	1	3	4	240	7	0	5	4	3	7	48	3	30	9	0	9
8450	12655	23966	6	0	10.4668	0	67	64	78	3	79	102	8	0	3	194	85	93	95	84	69	19.3182	10	-3	2	4	-14	3	-26.2684	4	1	2	2	2	3	5	400	8	0	6	4	0	0	28	0	72	0	0	29
8451	12530	23966	5	0	10.2368	0	100	106	93	3	102	92	33	0	1	200	85	91	94	80	75	14.7727	12	-7	3	-8	-5	3	0.703463	-2	1	1	3	1	3	4	240	7	0	5	4	3	7	48	3	30	9	0	9
8451	12530	23966	5	0	10.2368	0	100	106	93	3	102	92	33	0	2	128	85	91	94	80	75	14.7727	12	5	1	4	5	5	-1.0432	-2	1	1	3	1	3	4	240	7	0	5	4	3	7	48	3	30	9	0	9
8451	12529	23966	6	-1	10.2368	0	100	106	93	3	102	92	36	0	3	194	85	91	94	80	75	14.7727	12	-2	-2	5	-7	-8	-1.68789	0	1	2	2	2	4	5	300	8	0	5	4	0	18	40	0	42	0	0	0
8452	12530	23966	5	0	10.2149	0	113	111	111	3	115	110	13.5	0	1	200	105	107	113	97	94	14.7727	20	-1	5	1	-7	6	5.46537	-2	1	1	3	1	3	4	240	7	0	5	4	3	7	48	3	30	9	0	9
8452	12530	23966	5	0	10.2149	0	113	111	111	3	115	110	13.5	0	2	128	105	107	113	97	94	14.7727	20	-11	-2	-11	-10	-2	13.0952	-8	1	1	3	1	3	4	240	7	0	5	4	3	7	48	3	30	9	0	9
8452	12655	23966	6	0	10.2149	0	113	111	111	3	115	110	15.5	0	3	211	105	107	113	97	94	14.7727	20	-1	1	-4	3	-3	-8.59107	8	1	2	2	2	3	5	400	8	0	6	4	0	0	28	0	72	0	0	29
8453	12530	23966	5	0	10.1574	1	102	103	100	6	95	84	7.5	0	1	200	106	106	106	97	115	27.2727	22	-1	13	0	-4	2	10.8225	-8	1	1	3	1	3	4	240	7	0	5	4	3	7	48	3	30	9	0	9
8453	12530	23966	5	0	10.1574	1	102	103	100	6	95	84	7.5	0	2	128	106	106	106	97	115	27.2727	22	-2	-3	0	-2	-1	-4.7619	-10	1	1	3	1	3	4	240	7	0	5	4	3	7	48	3	30	9	0	9
8453	12655	23966	6	0	10.1574	1	102	103	100	6	95	84	8.5	0	3	194	106	106	106	97	115	27.2727	22	1	5	1	-4	5	-7.56014	8	1	2	2	2	3	5	400	8	0	6	4	0	0	28	0	72	0	0	29
8454	12530	23966	5	0	10.2286	1	80	75	91	3	93	78	16	0	1	200	92	99	101	89	80	2.27273	20	0	3	0	0	-2	13.2035	-4	1	1	3	1	3	4	240	7	0	5	4	3	7	48	3	30	9	0	9
8454	12530	23966	5	0	10.2286	1	80	75	91	3	93	78	16	0	2	128	92	99	101	89	80	2.27273	20	-4	3	-2	-6	-1	-14.4453	-8	1	1	3	1	3	4	240	7	0	5	4	3	7	48	3	30	9	0	9
8454	12529	23966	6	-1	10.2286	1	80	75	91	3	93	78	2	0	3		92	99	101	89	80	2.27273	20								1	2	2	2	4	5	300	8	0	5	4	0	18	40	0	42	0	0	0
8455	12530	23966	5	0	9.68104	0	81	69	98	3	102	94	13	0	1	200	75	96	86	67	82	14.7727	12	8	4	6	9	3	-4.05844	6	1	1	3	1	3	4	240	7	0	5	4	3	7	48	3	30	9	0	9
8455	12530	23966	5	0	9.68104	0	81	69	98	3	102	94	13	0	2	128	75	96	86	67	82	14.7727	12	-6	-3	1	-16	-2	-7.6215	-8	1	1	3	1	3	4	240	7	0	5	4	3	7	48	3	30	9	0	9
8455	12529	23966	6	-1	9.68104	0	81	69	98	3	102	94	9	0	3	194	75	96	86	67	82	14.7727	12	3	7	-3	16	-6	13.5739	-2	1	2	2	2	4	5	300	8	0	5	4	0	18	40	0	42	0	0	0
8456	12530	23966	5	0	9.71389	1	75	78	79	4	107	102	10.5	0	1	200	90	94	97	87	85	29.5455	8	3	2	7	-4	-1	1.40693	-2	1	1	3	1	3	4	240	7	0	5	4	3	7	48	3	30	9	0	9
8456	12530	23966	5	0	9.71389	1	75	78	79	4	107	102	10.5	0	2	129	90	94	97	87	85	29.5455	8	-5	0	-5	-7	2	-19.1877	2	1	1	3	1	3	4	240	7	0	5	4	3	7	48	3	30	9	0	9
8456	12655	23966	6	0	9.71389	1	75	78	79	4	107	102	1.5	0	3	190	90	94	97	87	85	29.5455	8	2	3	0	3	8	-3.51728	-2	1	2	2	2	3	5	400	8	0	6	4	0	0	28	0	72	0	0	29
8457	12530	23966	5	0	9.82615	1	110	102	115	5	97	102	17.5	0	1	200	92	114	96	96	74	28.4091	26	5	2	3	4	13	4.92424	-8	1	1	3	1	3	4	240	7	0	5	4	3	7	48	3	30	9	0	9
8457	12530	23966	5	0	9.82615	1	110	102	115	5	97	102	17.5	0	2	129	92	114	96	96	74	28.4091	26	-1	5	4	-14	10	-0.980392	-10	1	1	3	1	3	4	240	7	0	5	4	3	7	48	3	30	9	0	9
8457	12655	23966	6	0	9.82615	1	110	102	115	5	97	102	22	0	3	193	92	114	96	96	74	28.4091	26	-1	10	0	0	-1	-5.54882	12	1	2	2	2	3	5	400	8	0	6	4	0	0	28	0	72	0	0	29
8458	12530	23966	5	0	9.93018	1	98	94	102	5	104	105	4	0	1	200	92	101	93	88	101	23.8636	14	-3	8	0	-3	-7	-8.38745	-4	1	1	3	1	3	4	240	7	0	5	4	3	7	48	3	30	9	0	9
8458	12530	23966	5	0	9.93018	1	98	94	102	5	104	105	4	0	2	129	92	101	93	88	101	23.8636	14	2	-7	3	0	4	12.9552	-8	1	1	3	1	3	4	240	7	0	5	4	3	7	48	3	30	9	0	9
8458	12655	23966	6	0	9.93018	1	98	94	102	5	104	105	10.5	0	3	193	92	101	93	88	101	23.8636	14	-11	8	-7	-11	-14	-22.2458	2	1	2	2	2	3	5	400	8	0	6	4	0	0	28	0	72	0	0	29
8459	12530	23966	5	0	10.0233	1		84		3	107	108	14	0	1	200	85	105	90	84	87	22.7273	14	0	-7	3	-7	6	1.08225	-2	1	1	3	1	3	4	240	7	0	5	4	3	7	48	3	30	9	0	9
8459	12530	23966	5	0	10.0233	1		84		3	107	108	14	0	2	128	85	105	90	84	87	22.7273	14	-1	3	1	-3	-3	-6.16246	-4	1	1	3	1	3	4	240	7	0	5	4	3	7	48	3	30	9	0	9
8459	12655	23966	6	0	10.0233	1		84		3	107	108	9.5	0	3	194	85	105	90	84	87	22.7273	14	1	-4	2	0	0	-12.4924	6	1	2	2	2	3	5	400	8	0	6	4	0	0	28	0	72	0	0	29
8460	12530	23966	5	0	10.5051	0	101	109	92	4	123	122	16.5	0	1	200	94	102	93	94	103	18.1818	20	2	-1	9	-7	-2	12.7706	-4	1	1	3	1	3	4	240	7	0	5	4	3	7	48	3	30	9	0	9
8460	12530	23966	5	0	10.5051	0	101	109	92	4	123	122	16.5	0	2	128	94	102	93	94	103	18.1818	20	-3	3	-4	-6	5	-0.560224	-6	1	1	3	1	3	4	240	7	0	5	4	3	7	48	3	30	9	0	9
8460	12655	23966	6	0	10.5051	0	101	109	92	4	123	122	5	0	3	194	94	102	93	94	103	18.1818	20	-3	-6	0	-7	3	-18.021	0	1	2	2	2	3	5	400	8	0	6	4	0	0	28	0	72	0	0	29
8461	12530	23966	5	0	10.5681	1	81	80	88	3	93	96	11.5	0	1	200	82	97	92	79	70	18.1818	16	-2	-3	3	-10	4	4.43723	-6	1	1	3	1	3	4	240	7	0	5	4	3	7	48	3	30	9	0	9
8461	12530	23966	5	0	10.5681	1	81	80	88	3	93	96	11.5	0	2	130	82	97	92	79	70	18.1818	16	-5	-1	-6	-2	0	-12.8151	-2	1	1	3	1	3	4	240	7	0	5	4	3	7	48	3	30	9	0	9
8461	12655	23966	6	0	10.5681	1	81	80	88	3	93	96	17.5	0	3	192	82	97	92	79	70	18.1818	16	2	0	3	0	3	-8.77299	2	1	2	2	2	3	5	400	8	0	6	4	0	0	28	0	72	0	0	29
8462	12530	23966	5	0	10.6721	0	99	94	95	3	102	96	10.5	0	1	200	93	99	94	89	102	15.9091	18	1	0	3	1	-1	15.0433	-6	1	1	3	1	3	4	240	7	0	5	4	3	7	48	3	30	9	0	9
8462	12530	23966	5	0	10.6721	0	99	94	95	3	102	96	10.5	0	2	130	93	99	94	89	102	15.9091	18	2	-1	4	-3	3	-14.4575	-4	1	1	3	1	3	4	240	7	0	5	4	3	7	48	3	30	9	0	9
8462	12529	23966	6	-1	10.6721	0	99	94	95	3	102	96	6	0	3	192	93	99	94	89	102	15.9091	18	-5	-4	-6	3	-14	3.113	2	1	2	2	2	4	5	300	8	0	5	4	0	18	40	0	42	0	0	0
8463	12530	23966	5	0	10.3491	0	68	66	79	4	109	98	1	0	1	200	79	89	88	78	74	9.09091	12	-22	2	-17	-29	-3	-3.13853	-4	1	1	3	1	3	4	240	7	0	5	4	3	7	48	3	30	9	0	9
8463	12530	23966	5	0	10.3491	0	68	66	79	4	109	98	1	0	2	128	79	89	88	78	74	9.09091	12	3	1	2	7	0	3.32597	-2	1	1	3	1	3	4	240	7	0	5	4	3	7	48	3	30	9	0	9
8463	12529	23966	6	-1	10.3491	0	68	66	79	4	109	98	2.5	0	3	194	79	89	88	78	74	9.09091	12	6	0	12	1	-7	-4.37639	4	1	2	2	2	4	5	300	8	0	5	4	0	18	40	0	42	0	0	0
8464	12530	23966	5	0	10.3874	0	76	66	93	5	90	94	0	0	1	189	86	86	98	77	80	10.2273	10	-6	7	-4	-7	-1	10.0108	0	1	1	3	1	3	4	240	7	0	5	4	3	7	48	3	30	9	0	9
8464	12530	23966	5	0	10.3874	0	76	66	93	5	90	94	0	0	2	128	86	86	98	77	80	10.2273	10	-4	1	-2	-6	-7	-0.630252	-2	1	1	3	1	3	4	240	7	0	5	4	3	7	48	3	30	9	0	9
8464	12655	23966	6	0	10.3874	0	76	66	93	5	90	94	0	0	3	194	86	86	98	77	80	10.2273	10	-3	-11	-2	-3	3	-19.6078	4	1	2	2	2	3	5	400	8	0	6	4	0	0	28	0	72	0	0	29
8465	12530	23966	5	0	10.6229	1	79	80	83	3	102	100	15.5	0	1	200	70	88	75	75	73	22.7273	10	0	6	10	-14	1	-10.8225	2	1	1	3	1	3	4	240	7	0	5	4	3	7	48	3	30	9	0	9
8465	12530	23966	5	0	10.6229	1	79	80	83	3	102	100	15.5	0	2	129	70	88	75	75	73	22.7273	10	6	4	6	5	-2	9.74472	-2	1	1	3	1	3	4	240	7	0	5	4	3	7	48	3	30	9	0	9
8465	12529	23966	6	-1	10.6229	1	79	80	83	3	102	100	12	0	3	193	70	88	75	75	73	22.7273	10	1	0	3	1	-1	-7.92399	0	1	2	2	2	4	5	300	8	0	5	4	0	18	40	0	42	0	0	0
8466	12530	23966	5	0	9.97673	0	93	89	98	4	77	77	17.5	0	1	200	97	96	100	91	103	12.5	12	-15	4	-5	-18	-26		6	1	1	3	1	3	4	240	7	0	5	4	3	7	48	3	30	9	0	9
8466	12530	23966	5	0	9.97673	0	93	89	98	4	77	77	17.5	0	2	129	97	96	100	91	103	12.5	12	5	-1	-4	9	18		-10	1	1	3	1	3	4	240	7	0	5	4	3	7	48	3	30	9	0	9
8466	12529	23966	6	-1	9.97673	0	93	89	98	4	77	77	11.5	0	3	193	97	96	100	91	103	12.5	12	5	15	5	-1	13	2.43582	2	1	2	2	2	4	5	300	8	0	5	4	0	18	40	0	42	0	0	0
8467	12530	23966	5	0	10.5818	1	94	94	95	4	88	89	14.5	0	1	200	93	94	101	90	79	18.1818	30	1	4	5	-3	3	18.7229	-12	1	1	3	1	3	4	240	7	0	5	4	3	7	48	3	30	9	0	9
8467	12530	23966	5	0	10.5818	1	94	94	95	4	88	89	14.5	0	2	130	93	94	101	90	79	18.1818	30	-2	6	-7	4	-1	-8.03878	0	1	1	3	1	3	4	240	7	0	5	4	3	7	48	3	30	9	0	9
8467	12529	23966	6	-1	10.5818	1	94	94	95	4	88	89	19.5	0	3	192	93	94	101	90	79	18.1818	30	-4	-6	0	-4	-12	-14.1601	6	1	2	2	2	4	5	300	8	0	5	4	0	18	40	0	42	0	0	0
8468	12529	23966	5	-1	10.6721	1	69	69	77	4	97	105	31	0	1	195	74	85	86	67	76	5.95238	12	3	4	1	5	1	-1.40693	-4	1	1	2	2	4	5	300	8	0	6	4	0	17	66	0	17	0	0	0
8468	12529	23966	5	-1	10.6721	1	69	69	77	4	97	105	31	0	2	135	74	85	86	67	76	5.95238	12	-6	-1	-7	-2	-6	-1.60428	-2	1	1	2	2	4	5	300	8	0	6	4	0	17	66	0	17	0	0	0
8468	12655	23966	6	0	10.6721	1	69	69	77	4	97	105	41.5	0	3	192	74	85	86	67	76	5.95238	12	-5	-17	7	-11	-16	1.18253	4	1	2	2	2	3	5	400	8	0	6	4	0	0	28	0	72	0	0	29
8469	12529	23966	5	-1	10.0945	0	75	87	70	5	107	105		0	1	173	94	93	93	88	114	29.7619	14	1	5	2	-1	1	-1.35281	0	1	1	2	2	4	5	300	8	0	6	4	0	17	66	0	17	0	0	0
8469	12529	23966	5	-1	10.0945	0	75	87	70	5	107	105		0	2		94	93	93	88	114	29.7619	14								1	1	2	2	4	5	300	8	0	6	4	0	17	66	0	17	0	0	0
8469	12378	23945			10.0945	0	75	87	70	5	107	105		0	3		94	93	93	88	114	29.7619	14
8470	12529	23966	5	-1	10.4257	0	64	66	72	2	76	76		0	1	173	70	30	79	70	73	9.52381	10	-5	-1	-5	-4	-6	-4.97835	-10	1	1	2	2	4	5	300	8	0	6	4	0	17	66	0	17	0	0	0
8470	12529	23966	5	-1	10.4257	0	64	66	72	2	76	76		0	2		70	30	79	70	73	9.52381	10								1	1	2	2	4	5	300	8	0	6	4	0	17	66	0	17	0	0	0
8470	12378	23945			10.4257	0	64	66	72	2	76	76		0	3		70	30	79	70	73	9.52381	10
8471	12529	23966	5	-1	9.94387	0	80	64	102	3	110	105	10	0	1	173	98	107	104	93	95	16.6667	12	-5	-14	-8	-1	-3	4.92424	8	1	1	2	2	4	5	300	8	0	6	4	0	17	66	0	17	0	0	0
8471	12529	23966	5	-1	9.94387	0	80	64	102	3	110	105	10	0	2	134	98	107	104	93	95	16.6667	12	5	12	9	0	4	-2.96346	-12	1	1	2	2	4	5	300	8	0	6	4	0	17	66	0	17	0	0	0
8471	12655	23966	6	0	9.94387	0	80	64	102	3	110	105	6	0	3	193	98	107	104	93	95	16.6667	12	-5	4	-5	-8	0	-8.31817	4	1	2	2	2	3	5	400	8	0	6	4	0	0	28	0	72	0	0	29
8472	12529	23966	5	-1	10.4038	1	88	85	94	3	105	105	5.5	0	1	195	85	89	88	84	95	29.7619	10	3	1	3	0	3	-3.62554	4	1	1	2	2	4	5	300	8	0	6	4	0	17	66	0	17	0	0	0
8472	12529	23966	5	-1	10.4038	1	88	85	94	3	105	105	5.5	0	2	133	85	89	88	84	95	29.7619	10	6	7	12	2	-6	-0.646168	-10	1	1	2	2	4	5	300	8	0	6	4	0	17	66	0	17	0	0	0
8472	12655	23966	6	0	10.4038	1	88	85	94	3	105	105	6.5	0	3	194	85	89	88	84	95	29.7619	10	-13	0	-9	-14	-13	-8.99535	6	1	2	2	2	3	5	400	8	0	6	4	0	0	28	0	72	0	0	29
8473	12529	23966	5	-1	10.5133	1	86	88	87	3	107	102	3.5	0	1	195	86	108	99	73	84	21.4286	10	-6	2	-8	-3	4	6.98052	6	1	1	2	2	4	5	300	8	0	6	4	0	17	66	0	17	0	0	0
8473	12529	23966	5	-1	10.5133	1	86	88	87	3	107	102	3.5	0	2	133	86	108	99	73	84	21.4286	10	2	-1	3	8	-13	1.00267	-12	1	1	2	2	4	5	300	8	0	6	4	0	17	66	0	17	0	0	0
8473	12655	23966	6	0	10.5133	1	86	88	87	3	107	102	6	0	3	194	86	108	99	73	84	21.4286	10	3	4	4	-7	18	-7.76228	10	1	2	2	2	3	5	400	8	0	6	4	0	0	28	0	72	0	0	29
8474	12529	23966	5	-1	10.2861	1							2	0	1	195					107	42.8571	0					11	20.7792	20	1	1	2	2	4	5	300	8	0	6	4	0	17	66	0	17	0	0	0
8474	12529	23966	5	-1	10.2861	1							2	0	2	133					107	42.8571	0	-2	9	4	0	-16	-43.0481	0	1	1	2	2	4	5	300	8	0	6	4	0	17	66	0	17	0	0	0
8474	12655	23966	6	0	10.2861	1							7	0	3	194					107	42.8571	0	-6	6	-11	0	4	2.09218	20	1	2	2	2	3	5	400	8	0	6	4	0	0	28	0	72	0	0	29
8475	12529	23966	5	-1	9.97947	0	90	94	89	5	107	122	0	0	1	195	89	96	87	95	95	23.8095	14	6	-4	11	-4	4	4.59957	0	1	1	2	2	4	5	300	8	0	6	4	0	17	66	0	17	0	0	0
8475	12529	23966	5	-1	9.97947	0	90	94	89	5	107	122	0	0	2	134	89	96	87	95	95	23.8095	14	-13	8	-15	-13	4	-1.60497	-4	1	1	2	2	4	5	300	8	0	6	4	0	17	66	0	17	0	0	0
8475	12529	23966	6	-1	9.97947	0	90	94	89	5	107	122	0	0	3	193	89	96	87	95	95	23.8095	14	3	-6	6	6	-14	-5.2355	-2	1	2	2	2	4	5	300	8	0	5	4	0	18	40	0	42	0	0	0
8476	12586	23986	2	1	7.35113	1	93	85	103	3	97	105	6	0	1	179	94	94	92	98	95	20	12	0	1	6	-7	-8	1.95122	4	1	1	3	2	2	5	400		0	5	5	0	13	56	4	27	0	0	0
8476	12586	23986	2	1	7.35113	1	93	85	103	3	97	105	6	0	2	139	94	94	92	98	95	20	12	-4	-1	-8	3	0	-19.729	-4	1	1	3	2	2	5	400		0	5	5	0	13	56	4	27	0	0	0
8476	12695	23986	3	0	7.35113	1	93	85	103	3	97	105	7.5	0	3	193	94	94	92	98	95	20	12	4	1	9	-4	2	31.8687	14	1	2	2	2	3	5	400	7	1	4	5	3	50	0	3	44	0	0	28
8477	12586	23986	2	1	7.54552	1	109	108	107	3	92	104	1	0	1	179	115	114	123	100	98	25	38	-6	-3	-5	-4	-8	-5.4878	-4	1	1	3	2	2	5	400		0	5	5	0	13	56	4	27	0	0	0
8477	12586	23986	2	1	7.54552	1	109	108	107	3	92	104	1	0	2	144	115	114	123	100	98	25	38	-10	-6	-7	-9	-3	-15.0678	-10	1	1	3	2	2	5	400		0	5	5	0	13	56	4	27	0	0	0
8477	12695	23986	3	0	7.54552	1	109	108	107	3	92	104	1	0	3	188	115	114	123	100	98	25	38	7	3	6	9	0	20.5556	8	1	2	2	2	3	5	400	7	1	4	5	3	50	0	3	44	0	0	28
8478	12586	23986	2	1	7.56194	0	97	102	93	2	103	96	3.5	0	1	179	104	112	109	105	74	15	12	-3	-3	0	-9	7	-2.80488	4	1	1	3	2	2	5	400		0	5	5	0	13	56	4	27	0	0	0
8478	12586	23986	2	1	7.56194	0	97	102	93	2	103	96	3.5	0	2	144	104	112	109	105	74	15	12	-11	-4	-16	-6	3	-3.30623	-4	1	1	3	2	2	5	400		0	5	5	0	13	56	4	27	0	0	0
8478	12695	23986	3	0	7.56194	0	97	102	93	2	103	96	3	0	3	209	104	112	109	105	74	15	12	4	1	7	2	-1		6	1	2	2	2	3	5	400	7	1	4	5	3	50	0	3	44	0	0	28
8479	12586	23986	2	1	6.98973	0	108	84	129	2	110	106	8.5	0	1	179	95	103	114	79	83	7.5	36	18	5	7	18	17	2.2561	-2	1	1	3	2	2	5	400		0	5	5	0	13	56	4	27	0	0	0
8479	12586	23986	2	1	6.98973	0	108	84	129	2	110	106	8.5	0	2	143	95	103	114	79	83	7.5	36	-16	-4	-17	-7	-9	-9.7561	-16	1	1	3	2	2	5	400		0	5	5	0	13	56	4	27	0	0	0
8479	12695	23986	3	0	6.98973	0	108	84	129	2	110	106	4	0	3	189	95	103	114	79	83	7.5	36	1	5	13	-12	-3	15.9091	2	1	2	2	2	3	5	400	7	1	4	5	3	50	0	3	44	0	0	28
8480	12586	23986	2	1	6.97331	0	99	84	114	3	98	100	1	0	1	179	127	107	133	107	110	20	30	-14	0	-9	-15	-7	11.7073	8	1	1	3	2	2	5	400		0	5	5	0	13	56	4	27	0	0	0
8480	12586	23986	2	1	6.97331	0	99	84	114	3	98	100	1	0	2	143	127	107	133	107	110	20	30	5	-5	5	7	-6	-13.9295	-10	1	1	3	2	2	5	400		0	5	5	0	13	56	4	27	0	0	0
8480	12695	23986	3	0	6.97331	0	99	84	114	3	98	100	7	0	3	189	127	107	133	107	110	20	30	1	-5	-8	14	0	20.8586	-4	1	2	2	2	3	5	400	7	1	4	5	3	50	0	3	44	0	0	28
8481	12591	23986	5	-1	10.2423	1	97	108	86	2	100	98		0	1	179	77	80	85	75	78	6.81818	12	9	1	14	-4	10	5.68182	2	1	1	2	2	2	5	300	7	0	5	4	0	0	36	0	57	7	0	7
8481	12591	23986	5	-1	10.2423	1	97	108	86	2	100	98		0	2		77	80	85	75	78	6.81818	12								1	1	2	2	2	5	300	7	0	5	4	0	0	36	0	57	7	0	7
8481	12378	23945			10.2423	1	97	108	86	2	100	98		0	3		77	80	85	75	78	6.81818	12
8482	12591	23986	5	-1	9.86448	1	90	100	83	5	91	96	2	0	1	179	79	80	88	74	80	22.7273	8	-13	4	-6	-22	-1	-22.7273	6	1	1	2	2	2	5	300	7	0	5	4	0	0	36	0	57	7	0	7
8482	12591	23986	5	-1	9.86448	1	90	100	83	5	91	96	2	0	2	142	79	80	88	74	80	22.7273	8	15	1	7	27	1	14.7059	-4	1	1	2	2	2	5	300	7	0	5	4	0	0	36	0	57	7	0	7
8482	12657	23986	6	-1	9.86448	1	90	100	83	5	91	96	5	0	3	190	79	80	88	74	80	22.7273	8	0	2	0	-4	5	12.0982	2	1	2	3	2	4	5	350	7	1	4	3	0	46	7	0	0	47	0	48
8483	12531	23967	2	0	7.53457	1	102	108	95	2	119	109	3.5	0	1	183	107	102	106	105	108	25	24	7	0	6	5	2	-3.04878	2	1	1	2	2	4	5	300	7	1	5	4	25	50	0	2	23	0	0
8483	12531	23967	2	0	7.53457	1	102	108	95	2	119	109	3.5	0	2	143	107	102	106	105	108	25	24	-9	-1	-9	-3	-11	11.3821	0	1	1	2	2	4	5	300	7	1	5	4	25	50	0	2	23	0	0
8483	12532	23967	3	1	7.53457	1	102	108	95	2	119	109	0	0	3	185	107	102	106	105	108	25	24	2	-5	4	-3	4	-10.6061	4	1	2	3	2	2			8	0	4	3	23	29	17	10	21	0	0	21
8484	12531	23967	2	0	6.75975	1	113	116	105	2	88	95	3.5	0	1	183	118	101	118	116	96	10	26	4	1	0	7	8	2.19512	-4	1	1	2	2	4	5	300	7	1	5	4	25	50	0	2	23	0	0
8484	12531	23967	2	0	6.75975	1	113	116	105	2	88	95	3.5	0	2	142	118	101	118	116	96	10	26	-4	0	7	-20	-4	-7.64967	-8	1	1	2	2	4	5	300	7	1	5	4	25	50	0	2	23	0	0
8484	12658	23967	3	-1	6.75975	1	113	116	105	2	88	95	7	0	3	188	118	101	118	116	96	10	26	-4	2	-4	4	-16	46.5657	20	1	2	2	2	2		280	9	0	4	4	27	0	52	0	0	21	0	21
8485	12531	23967	2	0	7.20329	0	88	79	100	3	106	109	3.5	0	1	183	86	81	92	88	78	5	12	5	15	8	0	-5	7.19512	20	1	1	2	2	4	5	300	7	1	5	4	25	50	0	2	23	0	0
8485	12531	23967	2	0	7.20329	0	88	79	100	3	106	109	3.5	0	2	141	86	81	92	88	78	5	12	6	0	5	4	5	-7.64967	-20	1	1	2	2	4	5	300	7	1	5	4	25	50	0	2	23	0	0
8485	12658	23967	3	-1	7.20329	0	88	79	100	3	106	109	5.5	0	3	189	86	81	92	88	78	5	12	-17	-1	-13	-23	4	11.0101	6	1	2	2	2	2		280	9	0	4	4	27	0	52	0	0	21	0	21
8486	12531	23967	2	0	7.16496	0	87	94	84	2	114	110	14	0	1	183	106	100	109	104	93	22.5	12	-5	-3	-5	-1	-15	-12.7439	6	1	1	2	2	4	5	300	7	1	5	4	25	50	0	2	23	0	0
8486	12531	23967	2	0	7.16496	0	87	94	84	2	114	110	14	0	2	141	106	100	109	104	93	22.5	12	3	-3	1	2	11	1.60754	-4	1	1	2	2	4	5	300	7	1	5	4	25	50	0	2	23	0	0
8486	12658	23967	3	-1	7.16496	0	87	94	84	2	114	110	6	0	3	189	106	100	109	104	93	22.5	12	0	-1	7	-8	1	13.0808	12	1	2	2	2	2		280	9	0	4	4	27	0	52	0	0	21	0	21
8487	12531	23967	2	0	7.0883	0	93	85	103	2	97	111	6.5	0	1	183	107	103	105	109	98	10	12	0	4	11	-14	-8	21.7073	26	1	1	2	2	4	5	300	7	1	5	4	25	50	0	2	23	0	0
8487	12531	23967	2	0	7.0883	0	93	85	103	2	97	111	6.5	0	2	142	107	103	105	109	98	10	12	4	2	-3	12	6	-6.70732	-24	1	1	2	2	4	5	300	7	1	5	4	25	50	0	2	23	0	0
8487	12658	23967	3	-1	7.0883	0	93	85	103	2	97	111	4	0	3	188	107	103	105	109	98	10	12	0	-2	4	-6	1	-0.555556	22	1	2	2	2	2		280	9	0	4	4	27	0	52	0	0	21	0	21
8488	12531	23967	2	0	7.43874	1	113	111	111	4	109	113	3	0	1	183	113	110	121	97	100	22.5	32	-5	-5	0	-7	-5	16.5244	6	1	1	2	2	4	5	300	7	1	5	4	25	50	0	2	23	0	0
8488	12531	23967	2	0	7.43874	1	113	111	111	4	109	113	3	0	2	141	113	110	121	97	100	22.5	32	0	3	-1	3	-4	-3.46883	-12	1	1	2	2	4	5	300	7	1	5	4	25	50	0	2	23	0	0
8488	12532	23967	3	1	7.43874	1	113	111	111	4	109	113	7.5	0	3	187	113	110	121	97	100	22.5	32	1	-3	-2	8	-4	3.08081	8	1	2	3	2	2			8	0	4	3	23	29	17	10	21	0	0	21
8489	12531	23967	2	0	7.17317	1	103	103	102	2	92	84	22	0	1	183	97	88	101	97	85	5	18	-3	10	3	-8	-18	2.31707	14	1	1	2	2	4	5	300	7	1	5	4	25	50	0	2	23	0	0
8489	12531	23967	2	0	7.17317	1	103	103	102	2	92	84	22	0	2	141	97	88	101	97	85	5	18	-4	-26	5	-17	6	-7.31707	-18	1	1	2	2	4	5	300	7	1	5	4	25	50	0	2	23	0	0
8489	12532	23967	3	1	7.17317	1	103	103	102	2	92	84	19.5	0	3	187	97	88	101	97	85	5	18	1	16	-5	12	-8	18.1818	2	1	2	3	2	2			8	0	4	3	23	29	17	10	21	0	0	21
8490	12531	23967	2	0	7.30185	0	80	82	84	4	112	116	2	0	1	183	114	110	110	111	116	27.5	18	6	4	15	-1	-25	13.9634	16	1	1	2	2	4	5	300	7	1	5	4	25	50	0	2	23	0	0
8490	12531	23967	2	0	7.30185	0	80	82	84	4	112	116	2	0	2	141	114	110	110	111	116	27.5	18	-11	-6	-11	-11	7	-21.4634	-22	1	1	2	2	4	5	300	7	1	5	4	25	50	0	2	23	0	0
8490	12659	23967	3	0	7.30185	0	80	82	84	4	112	116	3	0	3	188	114	110	110	111	116	27.5	18	3	4	-2	13	-2	0.454545	18	0	2	3	3	3		250	7	0	5	4	17	6	56	0	21	0	0	0
8491	12531	23967	2	0	7.21424	0	106	122	88	2	81	83	0	0	1	183	85	93	86	92	80	4.87805	10	19	-5	21	20	-9	0	20	1	1	2	2	4	5	300	7	1	5	4	25	50	0	2	23	0	0
8491	12531	23967	2	0	7.21424	0	106	122	88	2	81	83	0	0	2	142	85	93	86	92	80	4.87805	10	-14	-2	-21	-7	6	6.23306	-20	1	1	2	2	4	5	300	7	1	5	4	25	50	0	2	23	0	0
8491	12659	23967	3	0	7.21424	0	106	122	88	2	81	83	6	0	3	187	85	93	86	92	80	4.87805	10	8	1	18	-5	-3	0.252525	6	0	2	3	3	3		250	7	0	5	4	17	6	56	0	21	0	0	0
8492	12531	23967	2	0	7.02806	0	110	105	111	2	89	93	5	0	1	183	93	108	94	100	74	7.5	10	-4	-2	-1	-9	4	-2.62195	18	1	1	2	2	4	5	300	7	1	5	4	25	50	0	2	23	0	0
8492	12531	23967	2	0	7.02806	0	110	105	111	2	89	93	5	0	2	142	93	108	94	100	74	7.5	10	1	0	7	-6	-11	6.23306	-18	1	1	2	2	4	5	300	7	1	5	4	25	50	0	2	23	0	0
8492	12532	23967	3	1	7.02806	0	110	105	111	2	89	93	0.5	0	3	186	93	108	94	100	74	7.5	10	5	-4	6	5	-1	-2.0202	14	1	2	3	2	2			8	0	4	3	23	29	17	10	21	0	0	21
8493	12531	23967	2	0	7.63039	1	111	126	93	3	96	100	8.5	0	1	183	94	98	98	89	100	20	14	1	-1	-1	6	-8	6.82927	18	1	1	2	2	4	5	300	7	1	5	4	25	50	0	2	23	0	0
8493	12531	23967	2	0	7.63039	1	111	126	93	3	96	100	8.5	0	2	143	94	98	98	89	100	20	14	0	0	5	-6	-1	-15.7182	-18	1	1	2	2	4	5	300	7	1	5	4	25	50	0	2	23	0	0
8493	12532	23967	3	1	7.63039	1	111	126	93	3	96	100	6	0	3	185	94	98	98	89	100	20	14	-5	-2	-5	-2	-10	4.79798	22	1	2	3	2	2			8	0	4	3	23	29	17	10	21	0	0	21
8494	12531	23967	2	0	6.95688	0	110	110	106	3	116	116	11.5	0	1	183	128	113	122	118	133	12.5	28	3	-6	8	-6	-1	19.2073	2	1	1	2	2	4	5	300	7	1	5	4	25	50	0	2	23	0	0
8494	12531	23967	2	0	6.95688	0	110	110	106	3	116	116	11.5	0	2	142	128	113	122	118	133	12.5	28	0	1	-3	-2	7	9.20177	-4	1	1	2	2	4	5	300	7	1	5	4	25	50	0	2	23	0	0
8494	12658	23967	3	-1	6.95688	0	110	110	106	3	116	116	1	0	3	188	128	113	122	118	133	12.5	28	5	0	-8	21	7	41.3131	6	1	2	2	2	2		280	9	0	4	4	27	0	52	0	0	21	0	21
8495	12531	23967	2	0	6.71595	1	125	121	122	1	96	104	5.5	0	1	183	85	101	90	85	98	10	10	23	0	17	22	3	9.5122	10	1	1	2	2	4	5	300	7	1	5	4	25	50	0	2	23	0	0
8495	12531	23967	2	0	6.71595	1	125	121	122	1	96	104	5.5	0	2	142	85	101	90	85	98	10	10	-12	-2	-11	-12	4	-8.40108	-8	1	1	2	2	4	5	300	7	1	5	4	25	50	0	2	23	0	0
8495	12659	23967	3	0	6.71595	1	125	121	122	1	96	104	16.5	0	3	187	85	101	90	85	98	10	10	0	-9	15	-19	-8	16.1616	6	0	2	3	3	3		250	7	0	5	4	17	6	56	0	21	0	0	0
8496	12531	23967	2	0	7.21424	0	114	103	121	3	104	97	6.5	0	1	183	120	96	118	123	85	22.5	22	6	6	11	-2	4	11.6463	16	1	1	2	2	4	5	300	7	1	5	4	25	50	0	2	23	0	0
8496	12531	23967	2	0	7.21424	0	114	103	121	3	104	97	6.5	0	2	142	120	96	118	123	85	22.5	22	-4	-5	-3	-11	11	-6.87361	-22	1	1	2	2	4	5	300	7	1	5	4	25	50	0	2	23	0	0
8496	12658	23967	3	-1	7.21424	0	114	103	121	3	104	97	2	0	3	188	120	96	118	123	85	22.5	22	3	-3	1	12	-9	26.0606	14	1	2	2	2	2		280	9	0	4	4	27	0	52	0	0	21	0	21
8497	12531	23967	2	0	6.705	1	111	113	105	2	106	116	8	0	1	183	106	121	109	100	104	17.5	12	-4	-4	2	-8	-14	14.2073	22	1	1	2	2	4	5	300	7	1	5	4	25	50	0	2	23	0	0
8497	12531	23967	2	0	6.705	1	111	113	105	2	106	116	8	0	2	142	106	121	109	100	104	17.5	12	1	2	2	3	-10	-24.8891	-16	1	1	2	2	4	5	300	7	1	5	4	25	50	0	2	23	0	0
8497	12658	23967	3	-1	6.705	1	111	113	105	2	106	116	12.5	0	3	188	106	121	109	100	104	17.5	12	-2	1	1	0	-13	15.404		1	2	2	2	2		280	9	0	4	4	27	0	52	0	0	21	0	21
8498	12532	23967	2	1	7.2909	1	81	76	91	2	108		6.5	0	1	183	93	106	85	111	86	10	10	-12	-4	-7	-20	0			1	1	3	2	2	5	300	8	0	4	4	20	0	45	5	30	0	0	0
8498	12532	23967	2	1	7.2909	1	81	76	91	2	108		6.5	0	2	141	93	106	85	111	86	10	10	4	-1	10	-5	-3			1	1	3	2	2	5	300	8	0	4	4	20	0	45	5	30	0	0	0
8498	12658	23967	3	-1	7.2909	1	81	76	91	2	108		11	0	3	189	93	106	85	111	86	10	10	4	-4	6	1	5	17.3737	14	1	2	2	2	2		280	9	0	4	4	27	0	52	0	0	21	0	21
8499	12532	23967	2	1	7.58932	0	107	97	114	2	98	105	6.5	0	1	182	107	114	106	95	131	40	12	-7	-2	6	-7	-45			1	1	3	2	2	5	300	8	0	4	4	20	0	45	5	30	0	0	0
8499	12532	23967	2	1	7.58932	0	107	97	114	2	98	105	6.5	0	2	144	107	114	106	95	131	40	12	5	-2	1	10	-2			1	1	3	2	2	5	300	8	0	4	4	20	0	45	5	30	0	0	0
8499	12659	23967	3	0	7.58932	0	107	97	114	2	98	105	4.5	0	3	185	107	114	106	95	131	40	12	9	1	6	6	15	32.1717	8	0	2	3	3	3		250	7	0	5	4	17	6	56	0	21	0	0	0
8500	12533	23967	5	0	9.89733	0	100	100	99	6	104	114	0	0	1	181	100	100	101	93	111	20.2381	10	-6	8	-5	-5	-8	16.1255	8	0	1	1	1	2	5	300	8	1	1	4	39	0	0	4	52	0	5	10
8500	12533	23967	5	0	9.89733	0	100	100	99	6	104	114	0	0	2	154	100	100	101	93	111	20.2381	10	-3	-7	-2	-3	2	-11.8538	-12	0	1	1	1	2	5	300	8	1	1	4	39	0	0	4	52	0	5	10
8500	12660	23967	6	0	9.89733	0	100	100	99	6	104	114	0	0	3	184	100	100	101	93	111	20.2381	10	5	0	6	3	-3	1.26339	16	0	2	2	1	4			8	1	4	3	0	28	0	6	61	5	0	66
8501	12533	23967	5	0	9.94661	0	82	70	99	4	76	81		0	1	177	70	82	82	70	58	9.52381	8	3	4	6	-4	9	-4.97835	10	0	1	1	1	2	5	300	8	1	1	4	39	0	0	4	52	0	5	10
8501	12533	23967	5	0	9.94661	0	82	70	99	4	76	81		0	2		70	82	82	70	58	9.52381	8								0	1	1	1	2	5	300	8	1	1	4	39	0	0	4	52	0	5	10
8501	12378	23945			9.94661	0	82	70	99	4	76	81		0	3		70	82	82	70	58	9.52381	8
8502	12533	23967	5	0	10.5216	0	117	104	124	4	105	98	7	0	1	181	90	120	95	88	87	25	8	6	19	9	3	1	-12.5	8	0	1	1	1	2	5	300	8	1	1	4	39	0	0	4	52	0	5	10
8502	12533	23967	5	0	10.5216	0	117	104	124	4	105	98	7	0	2	155	90	120	95	88	87	25	8	-7	-7	-5	-10	-2	4.16667	-10	0	1	1	1	2	5	300	8	1	1	4	39	0	0	4	52	0	5	10
8502	12660	23967	6	0	10.5216	0	117	104	124	4	105	98	10	0	3	183	90	120	95	88	87	25	8	-5	4	-5	-3	0	3.95189	4	0	2	2	1	4			8	1	4	3	0	28	0	6	61	5	0	66
8503	12533	23967	5	0	10.5845	0	106	104	105	5	123	132	8	0	1	181	85	101	95	73	93	20.2381	12	10	12	8	14	-2	-4.329	12	0	1	1	1	2	5	300	8	1	1	4	39	0	0	4	52	0	5	10
8503	12533	23967	5	0	10.5845	0	106	104	105	5	123	132	8	0	2	155	85	101	95	73	93	20.2381	12	1	-8	-2	0	10	14.4831	2	0	1	1	1	2	5	300	8	1	1	4	39	0	0	4	52	0	5	10
8503	12660	23967	6	0	10.5845	0	106	104	105	5	123	132	6.5	0	3	183	85	101	95	73	93	20.2381	12	15	-12	-1	45	-7	0.535678	4	0	2	2	1	4			8	1	4	3	0	28	0	6	61	5	0	66
8504	12533	23967	5	0	10.5791	1	96	86	106	4	79	84	8	0	1	177	84	103	93	80	82	25	14	-1	8	6	-11	-1	-7.95455	12	0	1	1	1	2	5	300	8	1	1	4	39	0	0	4	52	0	5	10
8504	12533	23967	5	0	10.5791	1	96	86	106	4	79	84	8	0	2	155	84	103	93	80	82	25	14	1	-2	-4	8	1	10.4055	-12	0	1	1	1	2	5	300	8	1	1	4	39	0	0	4	52	0	5	10
8504	12660	23967	6	0	10.5791	1	96	86	106	4	79	84	15	0	3	200	84	103	93	80	82	25	14	2	4	5	-3	0	-0.646857	-2	0	2	2	1	4			8	1	4	3	0	28	0	6	61	5	0	66
8505	12533	23967	5	0	10.5708	0	111	114	105	6	104	105	3.5	0	1	181	107	115	113	94	109	46.4286	14	7	-1	3	14	-4	-20.2922	14	0	1	1	1	2	5	300	8	1	1	4	39	0	0	4	52	0	5	10
8505	12533	23967	5	0	10.5708	0	111	114	105	6	104	105	3.5	0	2	155	107	115	113	94	109	46.4286	14	-5	3	-4	-11	5	5.23619	-8	0	1	1	1	2	5	300	8	1	1	4	39	0	0	4	52	0	5	10
8505	12660	23967	6	0	10.5708	0	111	114	105	6	104	105	8	0	3	183	107	115	113	94	109	46.4286	14	18	-4	14	22	-1	-3.5375	16	0	2	2	1	4			8	1	4	3	0	28	0	6	61	5	0	66
8506	12533	23967	5	0	10.2752	0	91	92	93	3	100	102	9	0	1	181	57	81	61	67	66	7.14286	2	21	-5	38	-4	1	-7.14286	14	0	1	1	1	2	5	300	8	1	1	4	39	0	0	4	52	0	5	10
8506	12533	23967	5	0	10.2752	0	91	92	93	3	100	102	9	0	2	153	57	81	61	67	66	7.14286	2	-24	-3	-35	-7	-2	10.7843	-14	0	1	1	1	2	5	300	8	1	1	4	39	0	0	4	52	0	5	10
8506	12660	23967	6	0	10.2752	0	91	92	93	3	100	102	13	0	3	185	57	81	61	67	66	7.14286	2	-2	6	-4	1	4	1.58682	6	0	2	2	1	4			8	1	4	3	0	28	0	6	61	5	0	66
8507	12533	23967	5	0	10.2259	1	70	58	90		105	102	1	0	1	181	76	98	80	75	87	30.9524	10	-6	-3	-2	-8	-5	-16.1797	8	0	1	1	1	2	5	300	8	1	1	4	39	0	0	4	52	0	5	10
8507	12533	23967	5	0	10.2259	1	70	58	90		105	102	1	0	2	153	76	98	80	75	87	30.9524	10	-3	-5	-5	1	0	8.75668	-12	0	1	1	1	2	5	300	8	1	1	4	39	0	0	4	52	0	5	10
8507	12660	23967	6	0	10.2259	1	70	58	90		105	102	2	0	3	185	76	98	80	75	87	30.9524	10	7	6	18	-6	-6	-2.91086	-2	0	2	2	1	4			8	1	4	3	0	28	0	6	61	5	0	66
8508	12533	23967	5	0	10.5599	1	86	86	89	4	95	102	0	0	1	181	67	86	75	69	67	19.0476	8	11	7	20	0	-1	-7.68398	6	0	1	1	1	2	5	300	8	1	1	4	39	0	0	4	52	0	5	10
8508	12533	23967	5	0	10.5599	1	86	86	89	4	95	102	0	0	2	155	67	86	75	69	67	19.0476	8	-14	-5	-20	-3	-3	3.34225	-4	0	1	1	1	2	5	300	8	1	1	4	39	0	0	4	52	0	5	10
8508	12660	23967	6	0	10.5599	1	86	86	89	4	95	102	2	0	3	183	67	86	75	69	67	19.0476	8	4	1	10	-2	-2	1.78896	-8	0	2	2	1	4			8	1	4	3	0	28	0	6	61	5	0	66
8509	12533	23967	5	0	9.71389	0	89	80	101	3	97	96	4	0	1	181	90	91	97	84	88	21.4286	6	0	9	4	-5	1	-2.11039	10	0	1	1	1	2	5	300	8	1	1	4	39	0	0	4	52	0	5	10
8509	12533	23967	5	0	9.71389	0	89	80	101	3	97	96	4	0	2	154	90	91	97	84	88	21.4286	6	-1	-6	-4	0	6	1.27005	-10	0	1	1	1	2	5	300	8	1	1	4	39	0	0	4	52	0	5	10
8509	12660	23967	6	0	9.71389	0	89	80	101	3	97	96	2.5	0	3	184	90	91	97	84	88	21.4286	6	-5	6	4	-18	1	-2.03153	2	0	2	2	1	4			8	1	4	3	0	28	0	6	61	5	0	66
8510	12533	23967	5	0	9.74401	1	88	89	90	3	90	94	13	0	1	181	81	84	86	80	88	3.57143	8	9	6	13	-1	6	12.3377	12	0	1	1	1	2	5	300	8	1	1	4	39	0	0	4	52	0	5	10
8510	12533	23967	5	0	9.74401	1	88	89	90	3	90	94	13	0	2	148	81	84	86	80	88	3.57143	8	-4	-7	-4	0	-8	4.70947	-10	0	1	1	1	2	5	300	8	1	1	4	39	0	0	4	52	0	5	10
8510	12661	23967	6	0	9.74401	1	88	89	90	3	90	94	0	0	3	189	81	84	86	80	88	3.57143	8	2	2	0	4	6	3.89125	2	0	2	2	1	4	5	300	8	0	5	4	0	33	14	8	39	6	0	6
8511	12533	23967	5	0	10.0151	1	101	105	96	4	109	105	5	0	1	181	85	93	98	74	80	8.33333	6	1	2	-5	10	0	13.2576	20	0	1	1	1	2	5	300	8	1	1	4	39	0	0	4	52	0	5	10
8511	12533	23967	5	0	10.0151	1	101	105	96	4	109	105	5	0	2	147	85	93	98	74	80	8.33333	6	11	-2	6	13	10	-10.2507	-18	0	1	1	1	2	5	300	8	1	1	4	39	0	0	4	52	0	5	10
8511	12661	23967	6	0	10.0151	1	101	105	96	4	109	105	11	0	3	190	85	93	98	74	80	8.33333	6	-6	3	-3	-13	9	5.32646	4	0	2	2	1	4	5	300	8	0	5	4	0	33	14	8	39	6	0	6
8512	12533	23967	5	0	10.5927	1	109	94	120	2	97	102	0	0	1	181	86	102	93	87	77	20.2381	4	-6	-2	0	-14	-5	0.21645	12	0	1	1	1	2	5	300	8	1	1	4	39	0	0	4	52	0	5	10
8512	12533	23967	5	0	10.5927	1	109	94	120	2	97	102	0	0	2	155	86	102	93	87	77	20.2381	4	5	-3	0	10	7	5.03565	-4	0	1	1	1	2	5	300	8	1	1	4	39	0	0	4	52	0	5	10
8512	12660	23967	6	0	10.5927	1	109	94	120	2	97	102	0	0	3	183	86	102	93	87	77	20.2381	4	2	7	7	-2	-5	-10.0263	0	0	2	2	1	4			8	1	4	3	0	28	0	6	61	5	0	66
8514	12533	23967	5	0	10.6667	1	114	112	111	4	95	89	9	0	1	181	90	101	97	86	87	28.5714	8	1	7	4	-7	7	-6.98052	18	0	1	1	1	2	5	300	8	1	1	4	39	0	0	4	52	0	5	10
8514	12533	23967	5	0	10.6667	1	114	112	111	4	95	89	9	0	2	155	90	101	97	86	87	28.5714	8	3	-7	-6	15	2	4.87968	-12	0	1	1	1	2	5	300	8	1	1	4	39	0	0	4	52	0	5	10
8514	12660	23967	6	0	10.6667	1	114	112	111	4	95	89	6.5	0	3	183	90	101	97	86	87	28.5714	8	-3	9	1	-10	5	0.333535	4	0	2	2	1	4			8	1	4	3	0	28	0	6	61	5	0	66
8515	12533	23967	5	0	10.6174	0	109	114	101	2	97	105	11.5	0	1	181	83	82	99	68	80	17.8571	10	1	6	0	5	-2	1.46104	14	0	1	1	1	2	5	300	8	1	1	4	39	0	0	4	52	0	5	10
8515	12533	23967	5	0	10.6174	0	109	114	101	2	97	105	11.5	0	2	154	83	82	99	68	80	17.8571	10	5	0	4	7	-3	2.25045	-12	0	1	1	1	2	5	300	8	1	1	4	39	0	0	4	52	0	5	10
8515	12660	23967	6	0	10.6174	0	109	114	101	2	97	105	2	0	3	184	83	82	99	68	80	17.8571	10	-5	2	-4	-6	2	4.20457	0	0	2	2	1	4			8	1	4	3	0	28	0	6	61	5	0	66
8516	12534	23967	5	0	9.86174	1	104	108	98	3	93	105	6	0	1	181	80	93	91	74	77	19.3182	6	8	3	8	6	2	4.49134	14	1	1	2	2	4	5	300	8	0	6	4	0	0	69	9	22	0	0	0
8516	12534	23967	5	0	9.86174	1	104	108	98	3	93	105	6	0	2	147	80	93	91	74	77	19.3182	6	-3	-3	-1	-6	-2	-6.28375	-8	1	1	2	2	4	5	300	8	0	6	4	0	0	69	9	22	0	0	0
8516	12661	23967	6	0	9.86174	1	104	108	98	3	93	105		0	3		80	93	91	74	77	19.3182	6								0	2	2	1	4	5	300	8	0	5	4	0	33	14	8	39	6	0	6
8517	12534	23967	5	0	10.1136	0	113	102	119	2	88		7.5	0	1	181	97	98	109	87	85	11.3636	12	-3	2	-5	0	-1	-1.83983	6	1	1	2	2	4	5	300	8	0	6	4	0	0	69	9	22	0	0	0
8517	12534	23967	5	0	10.1136	0	113	102	119	2	88		7.5	0	2	147	97	98	109	87	85	11.3636	12	2	-2	4	0	1	16.2494	-4	1	1	2	2	4	5	300	8	0	6	4	0	0	69	9	22	0	0	0
8517	12661	23967	6	0	10.1136	0	113	102	119	2	88		8.5	0	3	190	97	98	109	87	85	11.3636	12	1	3	-1	0	6	-0.283	4	0	2	2	1	4	5	300	8	0	5	4	0	33	14	8	39	6	0	6
8518	12534	23967	5	0	10.1273	0	94	95	95	2	105	96	10.5	0	1	181	86	91	89	91	79	17.0455	4	-1	2	8	-12	-5	5.57359	10	1	1	2	2	4	5	300	8	0	6	4	0	0	69	9	22	0	0	0
8518	12534	23967	5	0	10.1273	0	94	95	95	2	105	96	10.5	0	2	147	86	91	89	91	79	17.0455	4	-8	1	-18	4	7	3.15415	-4	1	1	2	2	4	5	300	8	0	6	4	0	0	69	9	22	0	0	0
8518	12661	23967	6	0	10.1273	0	94	95	95	2	105	96	8	0	3	190	86	91	89	91	79	17.0455	4	8	4	16	-3	-3	-0.283	4	0	2	2	1	4	5	300	8	0	5	4	0	33	14	8	39	6	0	6
8519	12534	23967	5	0	10.5352	0	94	80	110	2	107	110	8	0	1	181	91	100	99	84	89	13.6364	4	-3	8	-6	3	-2	3.0303	14	1	1	2	2	4	5	300	8	0	6	4	0	0	69	9	22	0	0	0
8519	12534	23967	5	0	10.5352	0	94	80	110	2	107	110	8	0	2	149	91	100	99	84	89	13.6364	4	2	0	6	-3	-4	-1.20275	-16	1	1	2	2	4	5	300	8	0	6	4	0	0	69	9	22	0	0	0
8519	12661	23967	6	0	10.5352	0	94	80	110	2	107	110	23.5	0	3	188	91	100	99	84	89	13.6364	4	5	2	8	0	3	0.222357	16	0	2	2	1	4	5	300	8	0	5	4	0	33	14	8	39	6	0	6
8520	12534	23967	5	0	10.2724	1	114	119	104	6	110	108	6.5	0	1	181	101	111	103	96	104	32.9545	22	2	-4	4	-3	4	7.52165	8	1	1	2	2	4	5	300	8	0	6	4	0	0	69	9	22	0	0	0
8520	12534	23967	5	0	10.2724	1	114	119	104	6	110	108	6.5	0	2	147	101	111	103	96	104	32.9545	22	1	4	0	3	-1	-6.45557	-2	1	1	2	2	4	5	300	8	0	6	4	0	0	69	9	22	0	0	0
8520	12661	23967	6	0	10.2724	1	114	119	104	6	110	108	5.5	0	3	191	101	111	103	96	104	32.9545	22	13	8	7	14	7	-0.687285	10	0	2	2	1	4	5	300	8	0	5	4	0	33	14	8	39	6	0	6
8521	12534	23967	5	0	9.84531	1	96	92	101	2	102	96	0	0	1	181	87	94	94	83	84	11.3636	8	3	3	5	-1	2	4.11255	14	1	1	2	2	4	5	300	8	0	6	4	0	0	69	9	22	0	0	0
8521	12534	23967	5	0	9.84531	1	96	92	101	2	102	96	0	0	2	148	87	94	94	83	84	11.3636	8	4	-4	4	4	5	11.3279	-6	1	1	2	2	4	5	300	8	0	6	4	0	0	69	9	22	0	0	0
8521	12661	23967	6	0	9.84531	1	96	92	101	2	102	96	3	0	3	190	87	94	94	83	84	11.3636	8	-6	2	-11	2	-2	-3.27471	0	0	2	2	1	4	5	300	8	0	5	4	0	33	14	8	39	6	0	6
8522	12534	23967	5	0	10.2067	1	95	106	85	4	100	98	12	0	1	181	91	92	101	83	85	13.6364	14	-4	4	-4	-4	0	6.60173	10	1	1	2	2	4	5	300	8	0	6	4	0	0	69	9	22	0	0	0
8522	12534	23967	5	0	10.2067	1	95	106	85	4	100	98	12	0	2	147	91	92	101	83	85	13.6364	14	12	2	2	21	14	1.41139	-12	1	1	2	2	4	5	300	8	0	6	4	0	0	69	9	22	0	0	0
8522	12661	23967	6	0	10.2067	1	95	106	85	4	100	98	9.5	0	3	190	91	92	101	83	85	13.6364	14	6	-1	18	-7	-7	-1.06125	8	0	2	2	1	4	5	300	8	0	5	4	0	33	14	8	39	6	0	6
8523	12534	23967	5	0	9.76318	0	103	102	102	4	111	102	19	0	1	181	97	95	100	95	94	15.9091	8	-7	7	-3	-12	2	-11.1472	12	1	1	2	2	4	5	300	8	0	6	4	0	0	69	9	22	0	0	0
8523	12534	23967	5	0	9.76318	0	103	102	102	4	111	102	19	0	2	148	97	95	100	95	94	15.9091	8	1	-4	2	-1	-2	8.64016	-10	1	1	2	2	4	5	300	8	0	6	4	0	0	69	9	22	0	0	0
8523	12661	23967	6	0	9.76318	0	103	102	102	4	111	102	29.5	0	3	189	97	95	100	95	94	15.9091	8	-1	1	1	-3	-4	-2.61775	12	0	2	2	1	4	5	300	8	0	5	4	0	33	14	8	39	6	0	6
8524	12534	23967	5	0	9.83162	1	94	100	89	3	97	96	17.5	0	1	181	95	86	102	87	96	17.0455	8	0	8	3	-1	-6	0.811688	16	1	1	2	2	4	5	300	8	0	6	4	0	0	69	9	22	0	0	0
8524	12534	23967	5	0	9.83162	1	94	100	89	3	97	96	17.5	0	2	154	95	86	102	87	96	17.0455	8	2	2	2	3	1	-8.05322	-12	1	1	2	2	4	5	300	8	0	6	4	0	0	69	9	22	0	0	0
8524	12660	23967	6	0	9.83162	1	94	100	89	3	97	96	29.5	0	3	201	95	86	102	87	96	17.0455	8	-12	-4	-13	-14	1	13.9074	8	0	2	2	1	4			8	1	4	3	0	28	0	6	61	5	0	66
8525	12534	23967	5	0	9.84531	1	103	105	99	2	91	94	13.5	0	1	181	101	89	109	90	100	29.5455	16	1	1	3	-1	-2	-11.6883	2	1	1	2	2	4	5	300	8	0	6	4	0	0	69	9	22	0	0	0
8525	12534	23967	5	0	9.84531	1	103	105	99	2	91	94	13.5	0	2	148	101	89	109	90	100	29.5455	16	1	-1	-7	6	9	14.1016	-6	1	1	2	2	4	5	300	8	0	6	4	0	0	69	9	22	0	0	0
8525	12661	23967	6	0	9.84531	1	103	105	99	2	91	94	10.5	0	3	189	101	89	109	90	100	29.5455	16	-1	0	-1	-3	6	7.25692	10	0	2	2	1	4	5	300	8	0	5	4	0	33	14	8	39	6	0	6
8526	12534	23967	5	0	10.601	0	81	86	80	2	95	92	2.5	0	1	181	89	82	97	83	85	21.5909	6	-4	7	-2	-3	-6	9.36147	18	1	1	2	2	4	5	300	8	0	6	4	0	0	69	9	22	0	0	0
8526	12534	23967	5	0	10.601	0	81	86	80	2	95	92	2.5	0	2	148	89	82	97	83	85	21.5909	6	6	0	6	0	12	-10.3338	-12	1	1	2	2	4	5	300	8	0	6	4	0	0	69	9	22	0	0	0
8526	12661	23967	6	0	10.601	0	81	86	80	2	95	92	4.5	0	3	189	89	82	97	83	85	21.5909	6	-1	2	-3	7	-6	-0.0303214	16	0	2	2	1	4	5	300	8	0	5	4	0	33	14	8	39	6	0	6
8527	12534	23967	5	0	10.2916	1	76	74	85	3	76	77	0	0	1	181	64	86	74	62	71	11.3636	10	3	2	3	1	4	-8.98268	0	1	1	2	2	4	5	300	8	0	6	4	0	0	69	9	22	0	0	0
8527	12534	23967	5	0	10.2916	1	76	74	85	3	76	77	0	0	2	147	64	86	74	62	71	11.3636	10	-9	-6	-13	1	-5	7.92833	-2	1	1	2	2	4	5	300	8	0	6	4	0	0	69	9	22	0	0	0
8527	12661	23967	6	0	10.2916	1	76	74	85	3	76	77	0	0	3	190	64	86	74	62	71	11.3636	10	-1	0	4	-7	-1	1.45543	-2	0	2	2	1	4	5	300	8	0	5	4	0	33	14	8	39	6	0	6
8529	12534	23967	5	0	10.2177	1	118	132	98	5	105	100	4	0	1	181	94	99	97	90	101	27.2727	8	2	19	2	3	-4	0.108225	24	1	1	2	2	4	5	300	8	0	6	4	0	0	69	9	22	0	0	0
8529	12534	23967	5	0	10.2177	1	118	132	98	5	105	100	4	0	2	147	94	99	97	90	101	27.2727	8	4	-6	6	0	4	-3.66961	-8	1	1	2	2	4	5	300	8	0	6	4	0	0	69	9	22	0	0	0
8529	12661	23967	6	0	10.2177	1	118	132	98	5	105	100	2	0	3	190	94	99	97	90	101	27.2727	8	24	11	21	21	6	4.72003	12	0	2	2	1	4	5	300	8	0	5	4	0	33	14	8	39	6	0	6
8530	12534	23967	5	0	9.74127	1	98	98	98	3	90	96	8	0	1	181	70	84	72	76	82	20.4545	6	9	-1	11	7	-5	-6.16883	12	1	1	2	2	4	5	300	8	0	6	4	0	0	69	9	22	0	0	0
8530	12534	23967	5	0	9.74127	1	98	98	98	3	90	96	8	0	2	148	70	84	72	76	82	20.4545	6	-3	2	-2	-4	2	11.4875	-8	1	1	2	2	4	5	300	8	0	6	4	0	0	69	9	22	0	0	0
8530	12661	23967	6	0	9.74127	1	98	98	98	3	90	96	3.5	0	3	189	70	84	72	76	82	20.4545	6	8	2	4	14	2	-4.20457	-2	0	2	2	1	4	5	300	8	0	5	4	0	33	14	8	39	6	0	6
8531	12534	23967	5	0	10.2231	0	101	100	101	3	105	108	7.5	0	1	181	86	91	97	79	80	4.54545	8	-4	1	-5	0	-5	6.16883	14	1	1	2	2	4	5	300	8	0	6	4	0	0	69	9	22	0	0	0
8531	12534	23967	5	0	10.2231	0	101	100	101	3	105	108	7.5	0	2	147	86	91	97	79	80	4.54545	8	6	-1	1	14	1	9.90427	-10	1	1	2	2	4	5	300	8	0	6	4	0	0	69	9	22	0	0	0
8531	12661	23967	6	0	10.2231	0	101	100	101	3	105	108	11	0	3	190	86	91	97	79	80	4.54545	8	-4	-1	2	-10	-6	-19.6382	-10	0	2	2	1	4	5	300	8	0	5	4	0	33	14	8	39	6	0	6
8532	12534	23967	5	0	10.6174	0	113	120	101	6	90	96	8.5	0	1	181	93	95	99	90	86	29.5455	6	-1	4	2	0	-9	-5.73593	20	1	1	2	2	4	5	300	8	0	6	4	0	0	69	9	22	0	0	0
8532	12534	23967	5	0	10.6174	0	113	120	101	6	90	96	8.5	0	2	154	93	95	99	90	86	29.5455	6	3	-4	4	4	-3	5.60224	-6	1	1	2	2	4	5	300	8	0	6	4	0	0	69	9	22	0	0	0
8532	12660	23967	6	0	10.6174	0	113	120	101	6	90	96	1.5	0	3	184	93	95	99	90	86	29.5455	6	8	4	12	-3	11	-3.63857	14	0	2	2	1	4			8	1	4	3	0	28	0	6	61	5	0	66
8533	12536	23968	2	1	7.56468	1	102	84	118	2	127	127	6	0	1	181	111	114	109	125	101	30	34	3	0	9	-20	-7	11.4634	6	1	1	2	1	4	5	300	9	1	4	4	17	29	0	10	44	0	0	44
8533	12536	23968	2	1	7.56468	1	102	84	118	2	127	127	6	0	2	141	111	114	109	125	101	30	34	1	3	0	2	5	24.4457	-26	1	1	2	1	4	5	300	9	1	4	4	17	29	0	10	44	0	0	44
8533	12662	23968	3	1	7.56468	1	102	84	118	2	127	127	2	0	3	192	111	114	109	125	101	30	34	10	8	6	11	8	0.757576	14	1	2	2	1	4		300	7	0	7	5	12	0	24	11	0	53	0	40
8534	12536	23968	2	1	7.46338	1	92	79	107	4	116	109	1	0	1	181	88	99	100	76	91	20	20	17	2	3	41	1	31.2195	18	1	1	2	1	4	5	300	9	1	4	4	17	29	0	10	44	0	0	44
8534	12536	23968	2	1	7.46338	1	92	79	107	4	116	109	1	0	2	147	88	99	100	76	91	20	20	5	2	9	-7	-3	-26.2195	-28	1	1	2	1	4	5	300	9	1	4	4	17	29	0	10	44	0	0	44
8534	12662	23968	3	1	7.46338	1	92	79	107	4	116	109	6.5	0	3	186	88	99	100	76	91	20	20	-7	-7	-4	-9	-2	28.3333	26	1	2	2	1	4		300	7	0	7	5	12	0	24	11	0	53	0	40
8535	12536	23968	2	1	7.32923	1	103	94	111	2	90	105	17.5	0	1	181	97	90	96	105	78	10	20	1	6	2	-7	13	14.3902	16	1	1	2	1	4	5	300	9	1	4	4	17	29	0	10	44	0	0	44
8535	12536	23968	2	1	7.32923	1	103	94	111	2	90	105	17.5	0	2	139	97	90	96	105	78	10	20	-15	-5	-11	-13	-11	-15.2993	-24	1	1	2	1	4	5	300	9	1	4	4	17	29	0	10	44	0	0	44
8535	12662	23968	3	1	7.32923	1	103	94	111	2	90	105	15	0	3	194	97	90	96	105	78	10	20	13	6	15	9	3	22.0202	8	1	2	2	1	4		300	7	0	7	5	12	0	24	11	0	53	0	40
8536	12536	23968	2	1	7.37851	1	114	103	121	2	102	85		0	1	190	106	104	126	84	80	20	30	12	3	-2	24	11	4.39024	8	1	1	2	1	4	5	300	9	1	4	4	17	29	0	10	44	0	0	44
8536	12536	23968	2	1	7.37851	1	114	103	121	2	102	85		0	2		106	104	126	84	80	20	30								1	1	2	1	4	5	300	9	1	4	4	17	29	0	10	44	0	0	44
8536	12378	23945			7.37851	1	114	103	121	2	102	85		0	3		106	104	126	84	80	20	30
8537	12536	23968	2	1	6.98152	0	107	76	135	5	106	111	4	0	1	181	117	121	115	113	107	30	26	16	-2	12	18	1	11.4634	6	1	1	2	1	4	5	300	9	1	4	4	17	29	0	10	44	0	0	44
8537	12536	23968	2	1	6.98152	0	107	76	135	5	106	111	4	0	2	140	117	121	115	113	107	30	26	-13	3	-3	-23	-7	15.3548	-8	1	1	2	1	4	5	300	9	1	4	4	17	29	0	10	44	0	0	44
8537	12662	23968	3	1	6.98152	0	107	76	135	5	106	111	6	0	3	193	117	121	115	113	107	30	26	5	-7	-1	13	7	3.18182	0	1	2	2	1	4		300	7	0	7	5	12	0	24	11	0	53	0	40
8538	12536	23968	2	1	6.91307	1	101	91	110	4	89	96	1	0	1	181	99	112	109	93	73	10	24	13	-2	9	14	8	4.63415	8	1	1	2	1	4	5	300	9	1	4	4	17	29	0	10	44	0	0	44
8538	12536	23968	2	1	6.91307	1	101	91	110	4	89	96	1	0	2	140	99	112	109	93	73	10	24	-15	1	-20	-7	7	25.3659	-14	1	1	2	1	4	5	300	9	1	4	4	17	29	0	10	44	0	0	44
8538	12536	23968	3	0	6.91307	1	101	91	110	4	89	96	2	0	3	193	99	112	109	93	73	10	24	5	-4	10	0	-2	0.909091	6	1	2	2	2	4	5	500	8	1	6	4	17	28	0	9	46	0	0	28
8539	12536	23968	2	1	6.70773	1	97	81	114	3	128	123	13.5	0	1	181	122	126	126	112	94	12.5	32	11	-5	2	16	19	-2.7439	8	1	1	2	1	4	5	300	9	1	4	4	17	29	0	10	44	0	0	44
8539	12536	23968	2	1	6.70773	1	97	81	114	3	128	123	13.5	0	2	140	122	126	126	112	94	12.5	32	-6	2	1	-13	-5	23.5772	-24	1	1	2	1	4	5	300	9	1	4	4	17	29	0	10	44	0	0	44
8539	12536	23968	3	0	6.70773	1	97	81	114	3	128	123	13.5	0	3	193	122	126	126	112	94	12.5	32	-6	-7	-12	7	-7	43.9394	18	1	2	2	2	4	5	500	8	1	6	4	17	28	0	9	46	0	0	28
8540	12536	23968	2	1	7.17864	1	102	85	118	2	108	105	12.5	0	1	181	108	97	109	109	83	22.5	26	10	10	14	-2	11	4.32927	14	1	1	2	1	4	5	300	9	1	4	4	17	29	0	10	44	0	0	44
8540	12536	23968	2	1	7.17864	1	102	85	118	2	108	105	12.5	0	2	139	108	97	109	109	83	22.5	26	-15	4	-14	-11	-2	-8.64745	-22	1	1	2	1	4	5	300	9	1	4	4	17	29	0	10	44	0	0	44
8540	12662	23968	3	1	7.17864	1	102	85	118	2	108	105	12.5	0	3	194	108	97	109	109	83	22.5	26	6	-2	2	13	1	19.596	10	1	2	2	1	4		300	7	0	7	5	12	0	24	11	0	53	0	40
8542	12537	23968	5	1	10.4093	1	134	127	132	6	123	122	2.5	0	1	181	122	130	125	118	96	25	26	2	4	-2	9	0	11.9048	10	1	1	2	1	4	8	560	8	0	5	4	14	0	51	8	27	0	0	0
8542	12537	23968	5	1	10.4093	1	134	127	132	6	123	122	2.5	0	2	139	122	130	125	118	96	25	26	0	-6	-13	14	8	-13.1934	-6	1	1	2	1	4	8	560	8	0	5	4	14	0	51	8	27	0	0	0
8542	12537	23968	6	-1	10.4093	1	134	127	132	6	123	122	10.5	0	3	197	122	130	125	118	96	25	26	2	5	3	-5	7	8.6416	6	1	2	2	3	4	5	500	9	0	4	4	0	38	20	4	9	29	0	22
8543	12537	23968	5	1	10.2752	1	91	90	94	2	102	81	18.5	0	1	181	92	106	101	86	82	10.2273	14	5	5	1	9	4	10.0108	10	1	1	2	1	4	8	560	8	0	5	4	14	0	51	8	27	0	0	0
8543	12537	23968	5	1	10.2752	1	91	90	94	2	102	81	18.5	0	2	138	92	106	101	86	82	10.2273	14	-14	-2	1	-23	-27	-20.2381	-12	1	1	2	1	4	8	560	8	0	5	4	14	0	51	8	27	0	0	0
8543	12537	23968	6	-1	10.2752	1	91	90	94	2	102	81	11.5	0	3	198	92	106	101	86	82	10.2273	14	6	9	-6	17	17	16.6667	2	1	2	2	3	4	5	500	9	0	4	4	0	38	20	4	9	29	0	22
8544	12537	23968	5	1	9.91376	1	103	102	102	2	105	92	5.5	0	1	181	98	110	111	86	90	17.0455	10	3	3	0	5	6	-15.855	18	1	1	2	1	4	8	560	8	0	5	4	14	0	51	8	27	0	0	0
8544	12537	23968	5	1	9.91376	1	103	102	102	2	105	92	5.5	0	2	140	98	110	111	86	90	17.0455	10	1	5	-6	8	3	25.6136	-16	1	1	2	1	4	8	560	8	0	5	4	14	0	51	8	27	0	0	0
8544	12537	23968	6	-1	9.91376	1	103	102	102	2	105	92	11.5	0	3	196	98	110	111	86	90	17.0455	10	1	1	1	-1	1	2.60764	12	1	2	2	3	4	5	500	9	0	4	4	0	38	20	4	9	29	0	22
8545	12537	23968	5	1	9.71389	0	75	66	91	4	107	96	45	0	1	181	92	90	105	80	84	9.09091	16	-1	0	-6	-1	13	12.3377	-6	1	1	2	1	4	8	560	8	0	5	4	14	0	51	8	27	0	0	0
8545	12537	23968	5	1	9.71389	0	75	66	91	4	107	96	45	0	2	148	92	90	105	80	84	9.09091	16	-6	5	-7	-7	7	-15.243	0	1	1	2	1	4	8	560	8	0	5	4	14	0	51	8	27	0	0	0
8545	12537	23968	6	-1	9.71389	0	75	66	91	4	107	96	60.5	0	3	188	92	90	105	80	84	9.09091	16	-1	-11	2	0	-12	-3.24439	2	1	2	2	3	4	5	500	9	0	4	4	0	38	20	4	9	29	0	22
8546	12537	23968	5	1	10.0945	1	112	105	115	5	107	100	32	0	1	181	92	111	105	81	83	4.54545	10	1	4	-2	9	-7	0.21645	12	1	1	2	1	4	8	560	8	0	5	4	14	0	51	8	27	0	0	0
8546	12537	23968	5	1	10.0945	1	112	105	115	5	107	100	32	0	2	140	92	111	105	81	83	4.54545	10	-1	-2	3	-6	1	11.7329	-12	1	1	2	1	4	8	560	8	0	5	4	14	0	51	8	27	0	0	0
8546	12537	23968	6	-1	10.0945	1	112	105	115	5	107	100		0	3		92	111	105	81	83	4.54545	10								1	2	2	3	4	5	500	9	0	4	4	0	38	20	4	9	29	0	22
8547	12537	23968	5	1	10.0151	0	115	117	108	4	102	92	21	0	1	181	109	106	112	99	105	23.8636	18	-11	5	-13	-2	-10	10.6602	14	1	1	2	1	4	8	560	8	0	5	4	14	0	51	8	27	0	0	0
8547	12537	23968	5	1	10.0151	0	115	117	108	4	102	92	21	0	2	139	109	106	112	99	105	23.8636	18	-2	0	7	-2	-22	-19.0599	-20	1	1	2	1	4	8	560	8	0	5	4	14	0	51	8	27	0	0	0
8547	12537	23968	6	-1	10.0151	0	115	117	108	4	102	92	15	0	3	197	109	106	112	99	105	23.8636	18	16	7	4	20	24	12.9675	18	1	2	2	3	4	5	500	9	0	4	4	0	38	20	4	9	29	0	22
8548	12478	23946	2	-1	7.64134	1	105	97	111	3	96	101	5	1	1	178	96	102	108	85	87	17.0732	16	-7	6	-8	-4	-12	7.92683	16	1	1	2	1	4	5	290	3	1	4	3	0	100	0	0	0	0	0	0
8548	12478	23946	2	-1	7.64134	1	105	97	111	3	96	101	5	1	2	139	96	102	108	85	87	17.0732	16	11	-7	9	12	11	-7.22222	-4	1	1	2	1	4	5	290	3	1	4	3	0	100	0	0	0	0	0	0
8548	13376	23946	3		7.64134	1	105	97	111	3	96	101	7	1	3		96	102	108	85	87	17.0732	16
8549	12478	23946	2	-1	7.14305	0	81	82	85	2	87	88	13	1	1	183	75	72	82	77	78	4.87805	10	-4	10	-2	-11	0	7.62195	0	1	1	2	1	4	5	290	3	1	4	3	0	100	0	0	0	0	0	0
8549	12478	23946	2	-1	7.14305	0	81	82	85	2	87	88	13	1	2	132	75	72	82	77	78	4.87805	10	10	2	6	17	-2	-5.68182	0	1	1	2	1	4	5	290	3	1	4	3	0	100	0	0	0	0	0	0
8549	13376	23946	3		7.14305	0	81	82	85	2	87	88	10	1	3		75	72	82	77	78	4.87805	10
8550	12478	23946	2	-1	7.45791	0	83	79	91	3	105	98	0	1	1	178	102	96	103	107	80	17.0732	22	4	0	8	-3	-1	5.42683	6	1	1	2	1	4	5	290	3	1	4	3	0	100	0	0	0	0	0	0
8550	12478	23946	2	-1	7.45791	0	83	79	91	3	105	98	0	1	2	137	102	96	103	107	80	17.0732	22	-6	-2	-3	-8	5	-6.59091	-6	1	1	2	1	4	5	290	3	1	4	3	0	100	0	0	0	0	0	0
8550	13376	23946	3		7.45791	0	83	79	91	3	105	98	0	1	3		102	96	103	107	80	17.0732	22
8551	12478	23946	2	-1	7.00616	0	100	114	85	2	116	114	27	1	1	163	103	113	98	107	107	26.8293	12	7	0	12	-6	5	0.670732	12	1	1	2	1	4	5	290	3	1	4	3	0	100	0	0	0	0	0	0
8551	12478	23946	2	-1	7.00616	0	100	114	85	2	116	114	27	1	2	138	103	113	98	107	107	26.8293	12	-9	-1	-7	-3	-9	-27.5	-14	1	1	2	1	4	5	290	3	1	4	3	0	100	0	0	0	0	0	0
8551	13376	23946	3		7.00616	0	100	114	85	2	116	114	10.5	1	3		103	113	98	107	107	26.8293	12
8552	12478	23946	2	-1	7.66051	1	75	74	82	2	98	104	4	1	1	178	75	85	68	89	91	21.9512	10	-1	2	9	-13	-9	5.54878	2	1	1	2	1	4	5	290	3	1	4	3	0	100	0	0	0	0	0	0
8552	12478	23946	2	-1	7.66051	1	75	74	82	2	98	104	4	1	2	139	75	85	68	89	91	21.9512	10	-1	-8	-5	8	-7	-16.1364	-6	1	1	2	1	4	5	290	3	1	4	3	0	100	0	0	0	0	0	0
8552	13376	23946	3		7.66051	1	75	74	82	2	98	104	4	1	3		75	85	68	89	91	21.9512	10
8553	12479	23946	5	1	9.88912	1	95	89	102	2	104	105	20.5	1	1	183	106	90	101	108	107		10	6	15	8	-9	17		8	1	1	2	2	4	5	300	8
8553	12479	23946	5	1	9.88912	1	95	89	102	2	104	105	20.5	1	2	138	106	90	101	108	107		10	-5	-6	0	3	-21	-1.582	-4	1	1	2	2	4	5	300	8
8553	12602	23946	6	0	9.88912	1	95	89	102	2	104	105	5.5	1	3	213	106	90	101	108	107		10	2	8	-5	7	5	-2.50657	-4	0	2	2	2	3	5	300	8	1	3	5	0	32	17	0	38	13	0	3
8554	12479	23946	5	1	10.3299	0	108	115	98	4	79	96		1	1	183	90	88	103	81	81		18	6	16	8	1	8		0	1	1	2	2	4	5	300	8
8554	12479	23946	5	1	10.3299	0	108	115	98	4	79	96		1	2		90	88	103	81	81		18								1	1	2	2	4	5	300	8
8554	12378	23945			10.3299	0	108	115	98	4	79	96		1	3		90	88	103	81	81		18
8555	12479	23946	5	1	10.5352	1	89	106	75	5	105	98	33	1	1	184	89	89	95	87	83		10	0	10	0	-3	7		6	1	1	2	2	4	5	300	8
8555	12479	23946	5	1	10.5352	1	89	106	75	5	105	98	33	1	2	139	89	89	95	87	83		10	2	-2	4	0	-2	1.47059	-8	1	1	2	2	4	5	300	8
8555	12602	23946	6	0	10.5352	1	89	106	75	5	105	98	35.5	1	3	211	89	89	95	87	83		10	5	5	-1	11	6	-3.79018	2	0	2	2	2	3	5	300	8	1	3	5	0	32	17	0	38	13	0	3
8556	12479	23946	5	1	10.078	1	97	106	89	3	111	114	1	1	1	184	94	98	100	91	83		12	-1	5	-5	-1	16		2	1	1	2	2	4	5	300	8
8556	12479	23946	5	1	10.078	1	97	106	89	3	111	114	1	1	2	137	94	98	100	91	83		12	2	5	8	-3	-9	-4.41176	0	1	1	2	2	4	5	300	8
8556	12602	23946	6	0	10.078	1	97	106	89	3	111	114	6	1	3	213	94	98	100	91	83		12	17	-2	11	21	10	5.18496	12	0	2	2	2	3	5	300	8	1	3	5	0	32	17	0	38	13	0	3
8557	12479	23946	5	1	9.74127	0	118	125	105	5	109	114	12	1	1	184	129	107	125	118	123		28	9	11	1	14	10		12	1	1	2	2	4	5	300	8
8557	12479	23946	5	1	9.74127	0	118	125	105	5	109	114	12	1	2	138	129	107	125	118	123		28	2	0	6	-2	-4	-41.1988	-12	1	1	2	2	4	5	300	8
8557	12602	23946	6	0	9.74127	0	118	125	105	5	109	114	16.5	1	3	212	129	107	125	118	123		28	-1	-2	-3	-1	6	20.1233	4	0	2	2	2	3	5	300	8	1	3	5	0	32	17	0	38	13	0	3
8559	12479	23946	5	1	10.4695	1	117	118	111	4	109	108	25	1	1	184	102	91	113	84	105		22	6	10	-5	13	13		0	1	1	2	2	4	5	300	8
8559	12479	23946	5	1	10.4695	1	117	118	111	4	109	108	25	1	2	139	102	91	113	84	105		22	6	2	10	1	-3	-25.0234	-4	1	1	2	2	4	5	300	8
8559	12603	23946	6	1	10.4695	1	117	118	111	4	109	108	25	1	3	211	102	91	113	84	105		22	4	2	-2	1	16	12.1892	0	1	2	3	2	2		220	7	1	6	4	8	45	0	0	47	0	0	47
8560	12479	23946	5	1	9.98494	1	92	106	80	4	107	94	0	1	1	184	96	85	90	111	91		8	6	2	10	-5	10		8	1	1	2	2	4	5	300	8
8560	12479	23946	5	1	9.98494	1	92	106	80	4	107	94	0	1	2	138	96	85	90	111	91		8	3	3	2	3	-1	-23.3066	-2	1	1	2	2	4	5	300	8
8560	12602	23946	6	0	9.98494	1	92	106	80	4	107	94	0	1	3	212	96	85	90	111	91		8	0	1	4	-8	2	22.2054	4	0	2	2	2	3	5	300	8	1	3	5	0	32	17	0	38	13	0	3
8561	12479	23946	5	1	10.1164	1	87	92	85	3	79	87	5.5	1	1	184	80	75	86	83	73		6	-6	0	-5	-10	5		2	1	1	2	2	4	5	300	8
8561	12479	23946	5	1	10.1164	1	87	92	85	3	79	87	5.5	1	2	137	80	75	86	83	73		6	8	2	4	17	-6	-5.59269	-2	1	1	2	2	4	5	300	8
8561	12602	23946	6	0	10.1164	1	87	92	85	3	79	87	4	1	3	213	80	75	86	83	73		6	12	7	9	14	7	-3.41621	-2	0	2	2	2	3	5	300	8	1	3	5	0	32	17	0	38	13	0	3
8563	12479	23946	5	1	9.80972	0	103	102	102	5	127	122	14	1	1	184	117	112	111	121	104		24	-1	16	1	-14	18		0	1	1	2	2	4	5	300	8
8563	12479	23946	5	1	9.80972	0	103	102	102	5	127	122	14	1	2	138	117	112	111	121	104		24	-3	-5	-5	0	-1	-8.95033	-6	1	1	2	2	4	5	300	8
8563	12603	23946	6	1	9.80972	0	103	102	102	5	127	122	14	1	3	212	117	112	111	121	104		24	-9	6	4	-25	1		-2	1	2	3	2	2		220	7	1	6	4	8	45	0	0	47	0	0	47
8564	12479	23946	5	1	10.13	0	101	113	83	4	109	108		1	1	184	100	96	99	94	114		6	16	14	13	-1	29		28	1	1	2	2	4	5	300	8
8564	12479	23946	5	1	10.13	0	101	113	83	4	109	108		1	2		100	96	99	94	114		6								1	1	2	2	4	5	300	8
8564	12378	23945			10.13	0	101	113	83	4	109	108		1	3		100	96	99	94	114		6
8565	12479	23946	5	1	10.3244	1	97	108	87	4	110	102	5.5	1	1	184	92	98	99	89	85		26	7	8	1	10	13		-2	1	1	2	2	4	5	300	8
8565	12479	23946	5	1	10.3244	1	97	108	87	4	110	102	5.5	1	2	139	92	98	99	89	85		26	2	8	5	4	-10	-10.4616	-10	1	1	2	2	4	5	300	8
8565	12603	23946	6	1	10.3244	1	97	108	87	4	110	102	13.5	1	3	211	92	98	99	89	85		26	-1	3	-3	0	2	0.323428	6	1	2	3	2	2		220	7	1	6	4	8	45	0	0	47	0	0	47
8566	12480	23946	5	0	10.0589	0	90	81	101	4	93	89	8.5	1	1	191	91	93	95	95	77	15.9091	14	-7	6	0	-15	-4	1.94805	0	0	1	1	1	3	5	300		1	6	5	22	53	0	0	25	0	0	25
8566	12480	23946	5	0	10.0589	0	90	81	101	4	93	89	8.5	1	2	130	91	93	95	95	77	15.9091	14	11	4	0	25	5	-16.8262	2	0	1	1	1	3	5	300		1	6	5	22	53	0	0	25	0	0	25
8566	12603	23946	6	1	10.0589	0	90	81	101	4	93	89	8	1	3	213	91	93	95	95	77	15.9091	14	3	0	6	-11	21	17.5965	-6	1	2	3	2	2		220	7	1	6	4	8	45	0	0	47	0	0	47
8567	12480	23946	5	0	10.5873	1	77	75	86	4	118	110	7.5	1	1	191	73	87	87	64	74	15.9091	10	3	2	1	9	-2	-11.1472	2	0	1	1	1	3	5	300		1	6	5	22	53	0	0	25	0	0	25
8567	12480	23946	5	0	10.5873	1	77	75	86	4	118	110	7.5	1	2	132	73	87	87	64	74	15.9091	10	7	3	3	7	10	13.8655	-4	0	1	1	1	3	5	300		1	6	5	22	53	0	0	25	0	0	25
8567	12602	23946	6	0	10.5873	1	77	75	86	4	118	110	5	1	3	211	73	87	87	64	74	15.9091	10	4	3	5	1	6	8.17667	4	0	2	2	2	3	5	300	8	1	3	5	0	32	17	0	38	13	0	3
8568	12480	23946	5	0	9.90007	0	104	121	85	5	107	114	1.5	1	1	191	108	90	104	104	115	34.0909	24	2	6	-1	10	-8	4.00433	2	0	1	1	1	3	5	300		1	6	5	22	53	0	0	25	0	0	25
8568	12480	23946	5	0	9.90007	0	104	121	85	5	107	114	1.5	1	2	131	108	90	104	104	115	34.0909	24	7	5	8	-4	14	-8.19833	-6	0	1	1	1	3	5	300		1	6	5	22	53	0	0	25	0	0	25
8568	12603	23946	6	1	9.90007	0	104	121	85	5	107	114	6.5	1	3	212	108	90	104	104	115	34.0909	24	-2	9	-3	-4	7	-7.34789	-2	1	2	3	2	2		220	7	1	6	4	8	45	0	0	47	0	0	47
8569	12480	23946	5	0	10.3409	1	81	98	69	3	109	105	0	1	1	191	95	89	98	95	87	30.6818	10	2	1	7	-3	1	-25.9199	8	0	1	1	1	3	5	300		1	6	5	22	53	0	0	25	0	0	25
8569	12480	23946	5	0	10.3409	1	81	98	69	3	109	105	0	1	2	138	95	89	98	95	87	30.6818	10	-5	0	-7	-6	6	18.9494	-4	0	1	1	1	3	5	300		1	6	5	22	53	0	0	25	0	0	25
8569	12612	23948	6	0	10.3409	1	81	98	69	3	109	105	0	1	3	194	95	89	98	95	87	30.6818	10	14	5	8	13	16	3.73964	10	1	2	2	1	4	5	250	8
8570	12480	23946	5	0	9.99863	0	90	92	90	4	105	94	27.5	1	1	189	85	75	100	77	67	12.5	4	-4	4	-5	-4	1	-8.92857	10	0	1	1	1	3	5	300		1	6	5	22	53	0	0	25	0	0	25
8570	12480	23946	5	0	9.99863	0	90	92	90	4	105	94	27.5	1	2	133	85	75	100	77	67	12.5	4	3	1	4	0	5	4.27171	-12	0	1	1	1	3	5	300		1	6	5	22	53	0	0	25	0	0	25
8570	12602	23946	6	0	9.99863	0	90	92	90	4	105	94	13	1	3	212	85	75	100	77	67	12.5	4	12	6	3	22	11	6.58985	2	0	2	2	2	3	5	300	8	1	3	5	0	32	17	0	38	13	0	3
8571	12480	23946	5	0	9.91376	0	106	108	102	4	123	118	4	1	1	189	90	100	98	81	92	25	8	-6	2	2	-15	-5	-9.52381	8	0	1	1	1	3	5	300		1	6	5	22	53	0	0	25	0	0	25
8571	12480	23946	5	0	9.91376	0	106	108	102	4	123	118	4	1	2	133	90	100	98	81	92	25	8	9	-2	4	22	-8	-3.71148	-8	0	1	1	1	3	5	300		1	6	5	22	53	0	0	25	0	0	25
8571	12602	23946	6	0	9.91376	0	106	108	102	4	123	118	5.5	1	3	212	90	100	98	81	92	25	8		6	0		21	7.82292	2	0	2	2	2	3	5	300	8	1	3	5	0	32	17	0	38	13	0	3
8572	12480	23946	5	0	10.2313	1	94	103	87	2	97	86		1	1	189	80	77	86	83	73	26.1364	6	-3	3	3	-12	-1	-7.08874	-4	0	1	1	1	3	5	300		1	6	5	22	53	0	0	25	0	0	25
8572	12480	23946	5	0	10.2313	1	94	103	87	2	97	86		1	2		80	77	86	83	73	26.1364	6								0	1	1	1	3	5	300		1	6	5	22	53	0	0	25	0	0	25
8572	12378	23945			10.2313	1	94	103	87	2	97	86		1	3		80	77	86	83	73	26.1364	6
8573	12480	23946	5	0	10.4257	1	75	64	92	2	97	92	13	1	1	189	72	86	82	69	73	9.09091	10	7	3	12	1	-3	-9.09091	0	0	1	1	1	3	5	300		1	6	5	22	53	0	0	25	0	0	25
8573	12480	23946	5	0	10.4257	1	75	64	92	2	97	92	13	1	2	134	72	86	82	69	73	9.09091	10	-2	-2	-10	11	0	0	0	0	1	1	1	3	5	300		1	6	5	22	53	0	0	25	0	0	25
8573	12603	23946	6	1	10.4257	1	75	64	92	2	97	92	21	1	3	211	72	86	82	69	73	9.09091	10	-13	4	-11	-17	0	5.88235	0	1	2	3	2	2		220	7	1	6	4	8	45	0	0	47	0	0	47
8574	12480	23946	5	0	9.99589	1	80	67	99	2	118	118	5	1	1	189	90	108	95	82	97	20.4545	12	7	13	9	2	8	4.54545	2	0	1	1	1	3	5	300		1	6	5	22	53	0	0	25	0	0	25
8574	12480	23946	5	0	9.99589	1	80	67	99	2	118	118	5	1	2	133	90	108	95	82	97	20.4545	12	1	1	-9	17	-4	2.45098	-4	0	1	1	1	3	5	300		1	6	5	22	53	0	0	25	0	0	25
8574	12602	23946	6	0	9.99589	1	80	67	99	2	118	118	4	1	3	212	90	108	95	82	97	20.4545	12	1	6	-1	-3	15	-8.89428	2	0	2	2	2	3	5	300	8	1	3	5	0	32	17	0	38	13	0	3
8575	12480	23946	5	0	10.3162	1	99	100	97	4	123	110		1	1		85	96	99	75	77	20.4545	6								0	1	1	1	3	5	300		1	6	5	22	53	0	0	25	0	0	25
8575	12480	23946	5	0	10.3162	1	99	100	97	4	123	110		1	2		85	96	99	75	77	20.4545	6								0	1	1	1	3	5	300		1	6	5	22	53	0	0	25	0	0	25
8575	12378	23945			10.3162	1	99	100	97	4	123	110		1	3		85	96	99	75	77	20.4545	6
8576	12480	23946	5	0	10.4367	0	107	104	107	5	135	127	29	1	1	189	110	109	113	102	106	13.6364	20	-4	7	0	-7	-2	6.60173	4	0	1	1	1	3	5	300		1	6	5	22	53	0	0	25	0	0	25
8576	12480	23946	5	0	10.4367	0	107	104	107	5	135	127	29	1	2	131	110	109	113	102	106	13.6364	20	8	4	12	3	-4	-12.395	-4	0	1	1	1	3	5	300		1	6	5	22	53	0	0	25	0	0	25
8576	12602	23946	6	0	10.4367	0	107	104	107	5	135	127	22	1	3	214	110	109	113	102	106	13.6364	20	8	3	-5	15	15	-2.6885	12	0	2	2	2	3	5	300	8	1	3	5	0	32	17	0	38	13	0	3
8577	12480	23946	5	0	9.71663	0	122	104	133	4	100	118	11	1	1	191	92	108	105	80	83	21.5909	28	15	1	5	28	5	-3.73377	2	0	1	1	1	3	5	300		1	6	5	22	53	0	0	25	0	0	25
8577	12480	23946	5	0	9.71663	0	122	104	133	4	100	118	11	1	2	131	92	108	105	80	83	21.5909	28	-2	11	2	-4	-6	-16.8768	-10	0	1	1	1	3	5	300		1	6	5	22	53	0	0	25	0	0	25
8577	12602	23946	6	0	9.71663	0	122	104	133	4	100	118	19.5	1	3	212	92	108	105	80	83	21.5909	28	3	4	-7	7	21	11.3907	-6	0	2	2	2	3	5	300	8	1	3	5	0	32	17	0	38	13	0	3
8578	12480	23946	5	0	10.2012	1	97	87	107	4	97	91	2	1	1	191	89	100	106	71	84	25	10	-3	4	-3	0	-4	-15.4762	4	0	1	1	1	3	5	300		1	6	5	22	53	0	0	25	0	0	25
8578	12480	23946	5	0	10.2012	1	97	87	107	4	97	91	2	1	2	132	89	100	106	71	84	25	10	1	-1	0	5	-4	-2.30731	-10	0	1	1	1	3	5	300		1	6	5	22	53	0	0	25	0	0	25
8578	12603	23946	6	1	10.2012	1	97	87	107	4	97	91	11.5	1	3	211	89	100	106	71	84	25	10	5	2	2	7	4	12.3913	2	1	2	3	2	2		220	7	1	6	4	8	45	0	0	47	0	0	47
8579	12480	23946	5	0	10.3491	0	86	87	89	4	105	87	7	1	1	189	80	81	91	78	67	9.09091	0	-3	3	0	-7	0	-5.51948	10	0	1	1	1	3	5	300		1	6	5	22	53	0	0	25	0	0	25
8579	12480	23946	5	0	10.3491	0	86	87	89	4	105	87	7	1	2	132	80	81	91	78	67	9.09091	0	0	-4	1	0	-3	1.33053	-6	0	1	1	1	3	5	300		1	6	5	22	53	0	0	25	0	0	25
8579	12602	23946	6	0	10.3491	0	86	87	89	4	105	87	6	1	3	213	80	81	91	78	67	9.09091	0	-3	-4	-2	-6	3	-4.90196	4	0	2	2	2	3	5	300	8	1	3	5	0	32	17	0	38	13	0	3
8580	12480	23946	5	0	10.193	1	94	90	100	2	91	100	13.5	1	1	119	77	93	89	67	79	7.95455	10	-6	-1	0	-12	-4	5.14069	6	0	1	1	1	3	5	300		1	6	5	22	53	0	0	25	0	0	25
8580	12480	23946	5	0	10.193	1	94	90	100	2	91	100	13.5	1	2	204	77	93	89	67	79	7.95455	10	11	5	8	17	-2	-10.0025	-6	0	1	1	1	3	5	300		1	6	5	22	53	0	0	25	0	0	25
8580	12603	23946	6	1	10.193	1	94	90	100	2	91	100	2.5	1	3	211	77	93	89	67	79	7.95455	10		-1	-11		11	20.4366	-10	1	2	3	2	2		220	7	1	6	4	8	45	0	0	47	0	0	47
8581	12480	23946	5	0	9.79329	0	91	78	106	2	93	100		1	1	119	85	58	94	79	82	12.5	8	2	1	2	3	-3	-5.35714	2	0	1	1	1	3	5	300		1	6	5	22	53	0	0	25	0	0	25
8581	12480	23946	5	0	9.79329	0	91	78	106	2	93	100		1	2		85	58	94	79	82	12.5	8								0	1	1	1	3	5	300		1	6	5	22	53	0	0	25	0	0	25
8581	12378	23945			9.79329	0	91	78	106	2	93	100		1	3		85	58	94	79	82	12.5	8
8582	12480	23946	5	0	10.5982	1	81	66	102	2	105	100	3	1	1	191	87	99	87	93	88	12.5	14	8	4	12	-3	10	19.6429	-2	0	1	1	1	3	5	300		1	6	5	22	53	0	0	25	0	0	25
8582	12480	23946	5	0	10.5982	1	81	66	102	2	105	100	3	1	2	131	87	99	87	93	88	12.5	14	6	3	2	14	-3	-15.4762	4	0	1	1	1	3	5	300		1	6	5	22	53	0	0	25	0	0	25
8582	12602	23946	6	0	10.5982	1	81	66	102	2	105	100	10.5	1	3	212	87	99	87	93	88	12.5	14	-1	-4	-5	-3	13	-8.41924	-4	0	2	2	2	3	5	300	8	1	3	5	0	32	17	0	38	13	0	3
8583	12480	23946	5	0	10.0151	1	100	102	98	5	105	114	0	1	1	191	100	98	107	91	97	26.1364	16	-2	10	2	-7	1	6.00649	2	0	1	1	1	3	5	300		1	6	5	22	53	0	0	25	0	0	25
8583	12480	23946	5	0	10.0151	1	100	102	98	5	105	114	0	1	2	130	100	98	107	91	97	26.1364	16	1	3	-3	7	-2	-16.4566	-2	0	1	1	1	3	5	300		1	6	5	22	53	0	0	25	0	0	25
8583	12602	23946	6	0	10.0151	1	100	102	98	5	105	114	0	1	3	213	100	98	107	91	97	26.1364	16	11	1	4	14	10	3.90135	6	0	2	2	2	3	5	300	8	1	3	5	0	32	17	0	38	13	0	3
8584	12480	23946	5	0	10.3107	0	80	87	78	4	115	110	1	1	1	189	101	105	105	100	92	12.5	12	8	5	6	-1	18	1.78571	12	0	1	1	1	3	5	300		1	6	5	22	53	0	0	25	0	0	25
8584	12480	23946	5	0	10.3107	0	80	87	78	4	115	110	1	1	2	132	101	105	105	100	92	12.5	12	2	9	4	0	-1	-10.162	-2	0	1	1	1	3	5	300		1	6	5	22	53	0	0	25	0	0	25
8584	12603	23946	6	1	10.3107	0	80	87	78	4	115	110		1	3		101	105	105	100	92	12.5	12								1	2	3	2	2		220	7	1	6	4	8	45	0	0	47	0	0	47
8585	12480	23946	5	0	9.68925	0	95	93	98	4	105	102	8	1	1	191	104	97	114	95	91	19.3182	18	3	4	3	2	0	-7.41342	6	0	1	1	1	3	5	300		1	6	5	22	53	0	0	25	0	0	25
8585	12480	23946	5	0	9.68925	0	95	93	98	4	105	102	8	1	2	130	104	97	114	95	91	19.3182	18	6	9	-1	15	0	-5.04202	-10	0	1	1	1	3	5	300		1	6	5	22	53	0	0	25	0	0	25
8585	12602	23946	6	0	9.68925	0	95	93	98	4	105	102	10.5	1	3	213	104	97	114	95	91	19.3182	18	-2	-7	0	-12	12	28.1888	6	0	2	2	2	3	5	300	8	1	3	5	0	32	17	0	38	13	0	3
8586	12480	23946	5	0	10.4504	0	96	106	86	3	109	110	34.5	1	1	191	94	82	107	77	99	19.3182	2	-6	0	-5	-4	-11	-3.84199	12	0	1	1	1	3	5	300		1	6	5	22	53	0	0	25	0	0	25
8586	12480	23946	5	0	10.4504	0	96	106	86	3	109	110	34.5	1	2	129	94	82	107	77	99	19.3182	2	4	5	-2	11	1	-1.7507	-6	0	1	1	1	3	5	300		1	6	5	22	53	0	0	25	0	0	25
8586	12602	23946	6	0	10.4504	0	96	106	86	3	109	110	22.5	1	3	214	94	82	107	77	99	19.3182	2	-1	3	4	-9	3	4.83121	-2	0	2	2	2	3	5	300	8	1	3	5	0	32	17	0	38	13	0	3
8587	12582	23985	2	0	7.46612	0	83	85	86	2	88	88	9.5	1	1	181	69	62	77	69	70	14.6341	12	-3	-2	0	-8	-2	-2.13415	5.5	1	1	2	2	3	5	300	7	1	5	4	0	21	70	0	9	0	0	9
8587	12582	23985	2	0	7.46612	0	83	85	86	2	88	88	9.5	1	2	133	69	62	77	69	70	14.6341	12	8	-2	-2	23	3	-12.5	-7.5	1	1	2	2	3	5	300	7	1	5	4	0	21	70	0	9	0	0	9
8587	12605	23985	3	0	7.46612	0	83	85	86	2	88	88		1	3		69	62	77	69	70	14.6341	12								1	2	3	1	3	5	300	8	1	6	4	7	52	0	6	35	0	0	0
8588	12582	23985	2	0	6.78166	0	95	99	92	5	110	108	4.5	1	1	181	119	106	119	112	111	14.6341	18	-11	-1	-4	-15	-11	7.86585	6	1	1	2	2	3	5	300	7	1	5	4	0	21	70	0	9	0	0	9
8588	12582	23985	2	0	6.78166	0	95	99	92	5	110	108	4.5	1	2	134	119	106	119	112	111	14.6341	18	7	-3	0	16	-2	13.0556	-10	1	1	2	2	3	5	300	7	1	5	4	0	21	70	0	9	0	0	9
8588	12605	23985	3	0	6.78166	0	95	99	92	5	110	108	6	1	3	196	119	106	119	112	111	14.6341	18	6	4	6	-1	10	-10.5556	4	1	2	3	1	3	5	300	8	1	6	4	7	52	0	6	35	0	0	0
8589	12582	23985	2	0	7.41958	0	109	117	97	3	111	98	6.5	1	1	181	103	103	105	103	87	31.7073	28	9	1	10	1	16	23.2927	-0.5	1	1	2	2	3	5	300	7	1	5	4	0	21	70	0	9	0	0	9
8589	12582	23985	2	0	7.41958	0	109	117	97	3	111	98	6.5	1	2	133	103	103	105	103	87	31.7073	28	-3	-4	-10	6	4	-23.8889	-15.5	1	1	2	2	3	5	300	7	1	5	4	0	21	70	0	9	0	0	9
8589	12605	23985	3	0	7.41958	0	109	117	97	3	111	98	12	1	3	197	103	103	105	103	87	31.7073	28	-1	-2	5	-9	-1	-3.83838	14	1	2	3	1	3	5	300	8	1	6	4	7	52	0	6	35	0	0	0
8590	12582	23985	2	0	7.50719	1	100	94	105	2	103	109	8.5	1	1	181	98	103	97	101	93	19.5122	20	-2	1	2	-5	-11	0.487805	2.5	1	1	2	2	3	5	300	7	1	5	4	0	21	70	0	9	0	0	9
8590	12582	23985	2	0	7.50719	1	100	94	105	2	103	109	8.5	1	2	133	98	103	97	101	93	19.5122	20	0	-3	-2	4	1	-13.3333	-2.5	1	1	2	2	3	5	300	7	1	5	4	0	21	70	0	9	0	0	9
8590	12605	23985	3	0	7.50719	1	100	94	105	2	103	109	2.5	1	3	197	98	103	97	101	93	19.5122	20	11	0	12	8	3	11.5152	12	1	2	3	1	3	5	300	8	1	6	4	7	52	0	6	35	0	0	0
8591	12582	23985	2	0	7.15948	0	75	79	78	2	103	109	10	1	1	182	104	85	109	98	91	9.7561	22	-2	8	-5	5	-5	25.2439	0.5	1	1	2	2	3	5	300	7	1	5	4	0	21	70	0	9	0	0	9
8591	12582	23985	2	0	7.15948	0	75	79	78	2	103	109	10	1	2	132	104	85	109	98	91	9.7561	22	6	-7	9	-1	4	-19.4444	-10.5	1	1	2	2	3	5	300	7	1	5	4	0	21	70	0	9	0	0	9
8591	12606	23985	3	-1	7.15948	0	75	79	78	2	103	109	13.5	1	3	197	104	85	109	98	91	9.7561	22	-6	6	0	-10	-7	-4.19192	16	1	2	2	1	3	5	325	6	1	6	4	0	81	6	0	13	0	0	0
8592	12582	23985	2	0	7.18412	1	108	100	113	3	90	93	10	1	1	181	96	104	93	109	78	12.1951	18	-7	6	5	-24	3	10.3049	-2	1	1	2	2	3	5	300	7	1	5	4	0	21	70	0	9	0	0	9
8592	12582	23985	2	0	7.18412	1	108	100	113	3	90	93	10	1	2	133	96	104	93	109	78	12.1951	18	1	-8	-9	16	-5	-4.72222	-4	1	1	2	2	3	5	300	7	1	5	4	0	21	70	0	9	0	0	9
8592	12694	23985	3	1	7.18412	1	108	100	113	3	90	93	14.5	1	3	197	96	104	93	109	78	12.1951	18	1	-3	9	-13	6	-1.86869	12	1	2						7	1	6	5	13	52	0	0	35	0	0	35
8593	12582	23985	2	0	7.23888	0	89	85	95	3	106	103		1	1	181	116	112	118	107	103	26.8293	28	2	-3	5	-5	3	13.1707	0	1	1	2	2	3	5	300	7	1	5	4	0	21	70	0	9	0	0	9
8593	12582	23985	2	0	7.23888	0	89	85	95	3	106	103		1	2		116	112	118	107	103	26.8293	28								1	1	2	2	3	5	300	7	1	5	4	0	21	70	0	9	0	0	9
8593	12378	23945			7.23888	0	89	85	95	3	106	103		1	3		116	112	118	107	103	26.8293	28
8594	12582	23985	2	0	7.63587	1	104	91	115	5	98	98	9.5	1	1	181	114	82	119	108	86	24.3902	24	-7	0	1	-17	3	-6.89024	0	1	1	2	2	3	5	300	7	1	5	4	0	21	70	0	9	0	0	9
8594	12582	23985	2	0	7.63587	1	104	91	115	5	98	98	9.5	1	2	135	114	82	119	108	86	24.3902	24	-8	-3	-14	7	-12	2.5	-6	1	1	2	2	3	5	300	7	1	5	4	0	21	70	0	9	0	0	9
8594	12605	23985	3	0	7.63587	1	104	91	115	5	98	98	4	1	3	195	114	82	119	108	86	24.3902	24	-4	8	0	-7	-2	5	10	1	2	3	1	3	5	300	8	1	6	4	7	52	0	6	35	0	0	0
8595	12582	23985	2	0	7.44969	0	116	124	102	2	82	87	3	1	1	181	112	80	110	112	102	21.9512	32	6	8	11	-4	1	18.0488	-4	1	1	2	2	3	5	300	7	1	5	4	0	21	70	0	9	0	0	9
8595	12582	23985	2	0	7.44969	0	116	124	102	2	82	87	3	1	2	133	112	80	110	112	102	21.9512	32	-9	1	-9	-7	2	-17.7778	2	1	1	2	2	3	5	300	7	1	5	4	0	21	70	0	9	0	0	9
8595	12605	23985	3	0	7.44969	0	116	124	102	2	82	87	3.5	1	3	197	112	80	110	112	102	21.9512	32	6	11	8	8	-12	16.4141	8	1	2	3	1	3	5	300	8	1	6	4	7	52	0	6	35	0	0	0
8596	12582	23985	2	0	6.77344	1	108	105	108	4	103	101	11.5	1	1	181	113	120	118	105	92	14.6341	18	-3	-5	-3	-3	7	12.8659	2	1	1	2	2	3	5	300	7	1	5	4	0	21	70	0	9	0	0	9
8596	12582	23985	2	0	6.77344	1	108	105	108	4	103	101	11.5	1	2	134	113	120	118	105	92	14.6341	18	10	-4	7	11	-4	-5.27778	-6	1	1	2	2	3	5	300	7	1	5	4	0	21	70	0	9	0	0	9
8596	12605	23985	3	0	6.77344	1	108	105	108	4	103	101	14	1	3	196	113	120	118	105	92	14.6341	18	2	2	4	-1	5	9.59596	18	1	2	3	1	3	5	300	8	1	6	4	7	52	0	6	35	0	0	0
8597	12582	23985	2	0	7.14579	1	105	105	103	3	112	99		1	1		84	107	82	94	86	12.1951	16								1	1	2	2	3	5	300	7	1	5	4	0	21	70	0	9	0	0	9
8597	12582	23985	2	0	7.14579	1	105	105	103	3	112	99		1	2		84	107	82	94	86	12.1951	16								1	1	2	2	3	5	300	7	1	5	4	0	21	70	0	9	0	0	9
8597	12378	23945			7.14579	1	105	105	103	3	112	99		1	3		84	107	82	94	86	12.1951	16
8598	12582	23985	2	0	6.8501	0	122	120	117	3	92	109	8	1	1	181	116	116	116	109	106	29.2683	24	-9	-1	-3	-14	0	-11.7683	0	1	1	2	2	3	5	300	7	1	5	4	0	21	70	0	9	0	0	9
8598	12582	23985	2	0	6.8501	0	122	120	117	3	92	109	8	1	2	133	116	116	116	109	106	29.2683	24	2	-6	1	2	-1	6.94444	-2	1	1	2	2	3	5	300	7	1	5	4	0	21	70	0	9	0	0	9
8598	12694	23985	3	1	6.8501	0	122	120	117	3	92	109	13.5	1	3	221	116	116	116	109	106	29.2683	24	10	3	9	9	0	2.82828	12	1	2						7	1	6	5	13	52	0	0	35	0	0	35
8599	12582	23985	2	0	7.22793	1	111	118	101	2	104	99	12.5	1	1	181	101	103	101	102	99	7.31707	26	-12	-7	-11	-9	-14	15.1829	-6	1	1	2	2	3	5	300	7	1	5	4	0	21	70	0	9	0	0	9
8599	12582	23985	2	0	7.22793	1	111	118	101	2	104	99	12.5	1	2	133	101	103	101	102	99	7.31707	26	-2	1	-6	8	-7	-6.94444	-8	1	1	2	2	3	5	300	7	1	5	4	0	21	70	0	9	0	0	9
8599	12605	23985	3	0	7.22793	1	111	118	101	2	104	99	5.5	1	3	197	101	103	101	102	99	7.31707	26	11	0	17	-1	5	-1.91919	18	1	2	3	1	3	5	300	8	1	6	4	7	52	0	6	35	0	0	0
8600	12582	23985	2	0	6.76249	0	132	139	117	7	130	127	2	1	1	181	135	123	137	118	125	14.6341	26	6	-2	-2	12	0	37.8659	14	1	1	2	2	3	5	300	7	1	5	4	0	21	70	0	9	0	0	9
8600	12582	23985	2	0	6.76249	0	132	139	117	7	130	127	2	1	2	134	135	123	137	118	125	14.6341	26	-14	-8	-3	-12	-43	-50.2778	-14	1	1	2	2	3	5	300	7	1	5	4	0	21	70	0	9	0	0	9
8600	12694	23985	3	1	6.76249	0	132	139	117	7	130	127	6.5	1	3	196	135	123	137	118	125	14.6341	26	12	6	0	13	40	29.596	10	1	2						7	1	6	5	13	52	0	0	35	0	0	35
8601	12582	23985	2	0	7.55373	0	93	82	106	6	109	111	12.5	1	1	181	128	114	129	120	103	24.3902	32	-10	2	-3	-19	-1	18.1098	0	1	1	2	2	3	5	300	7	1	5	4	0	21	70	0	9	0	0	9
8601	12582	23985	2	0	7.55373	0	93	82	106	6	109	111	12.5	1	2	135	128	114	129	120	103	24.3902	32	6	-6	2	12	-1	-11.3889	-6	1	1	2	2	3	5	300	7	1	5	4	0	21	70	0	9	0	0	9
8601	12694	23985	3	1	7.55373	0	93	82	106	6	109	111	15	1	3	195	128	114	129	120	103	24.3902	32	-5	3	-9	-1	6	18.8889	4	1	2						7	1	6	5	13	52	0	0	35	0	0	35
8602	12582	23985	2	0	6.86927	0	99	91	106	3	101	97	14	1	1	181	108	103	109	109	88	4.87805	26	-11	1	-10	-9	-7	0.121951	0	1	1	2	2	3	5	300	7	1	5	4	0	21	70	0	9	0	0	9
8602	12582	23985	2	0	6.86927	0	99	91	106	3	101	97	14	1	2	134	108	103	109	109	88	4.87805	26	-4	2	-3	-7	2	-5	-12	1	1	2	2	3	5	300	7	1	5	4	0	21	70	0	9	0	0	9
8602	12605	23985	3	0	6.86927	0	99	91	106	3	101	97	11	1	3	196	108	103	109	109	88	4.87805	26	15	2	16	13	4	6.81818	6	1	2	3	1	3	5	300	8	1	6	4	7	52	0	6	35	0	0	0
8603	12582	23985	2	0	7.03628	0	94	84	105	2	103	103	2.5	1	1	181	114	89	114	111	97	17.0732	12	-1	8	7	-10	-13	2.92683	6	1	1	2	2	3	5	300	7	1	5	4	0	21	70	0	9	0	0	9
8603	12582	23985	2	0	7.03628	0	94	84	105	2	103	103	2.5	1	2	133	114	89	114	111	97	17.0732	12	-3	-6	-3	-2	6	4.44444	-6	1	1	2	2	3	5	300	7	1	5	4	0	21	70	0	9	0	0	9
8603	12605	23985	3	0	7.03628	0	94	84	105	2	103	103	3	1	3	197	114	89	114	111	97	17.0732	12	5	9	0	13	2	2.82828	24	1	2	3	1	3	5	300	8	1	6	4	7	52	0	6	35	0	0	0
8604	12582	23985	2	0	6.95414	0	106	99	111	3	121	110	3	1	1	181	114	100	108	118	107	17.0732	16	1	-2	6	-6	-3	22.9268	2	1	1	2	2	3	5	300	7	1	5	4	0	21	70	0	9	0	0	9
8604	12582	23985	2	0	6.95414	0	106	99	111	3	121	110	3	1	2	134	114	100	108	118	107	17.0732	16	-3	1	2	-7	-9	-28.8889	-2	1	1	2	2	3	5	300	7	1	5	4	0	21	70	0	9	0	0	9
8604	12605	23985	3	0	6.95414	0	106	99	111	3	121	110	2	1	3	196	114	100	108	118	107	17.0732	16	0	-2	-2	4	-1	20.7071	2	1	2	3	1	3	5	300	8	1	6	4	7	52	0	6	35	0	0	0
8605	12582	23985	2	0	7.60849	1	78	74	88	2	95	95	2.5	1	1	181	100	103	104	98	87	14.6341	16	-2	2	-3	-2	1	17.8659	-2	1	1	2	2	3	5	300	7	1	5	4	0	21	70	0	9	0	0	9
8605	12582	23985	2	0	7.60849	1	78	74	88	2	95	95	2.5	1	2	134	100	103	104	98	87	14.6341	16	-3	-8	-5	2	0	-14.7222	2	1	1	2	2	3	5	300	7	1	5	4	0	21	70	0	9	0	0	9
8605	12694	23985	3	1	7.60849	1	78	74	88	2	95	95	7	1	3	196	100	103	104	98	87	14.6341	16	14	5	20	0	9	27.6768	20	1	2						7	1	6	5	13	52	0	0	35	0	0	35
8606	12583	23985	2	0	7.25257	0	104	100	107	2			9.5	1	1	182	94	93	101	88	94	22.5	12	12	6	9	9	11	4.32927	8	0	1	2	4	3	5	500	5	1	4	3	0	22	0	5	73	0	0	70
8606	12583	23985	2	0	7.25257	0	104	100	107	2			9.5	1	2	134	94	93	101	88	94	22.5	12	1	-5	2	-1	0	-0.162602	-12	0	1	2	4	3	5	500	5	1	4	3	0	22	0	5	73	0	0	70
8606	12606	23985	3	-1	7.25257	0	104	100	107	2			10.5	1	3	196	94	93	101	88	94	22.5	12	-2	0	-5	-1	8	9.69697	12	1	2	2	1	3	5	325	6	1	6	4	0	81	6	0	13	0	0	0
8607	12583	23985	2	0	7.20055	0	90	85	98	2	102	93	19.5	1	1	182	79	78	84	84	72	7.5	16	13	24	11	5	23	7.13415	2	0	1	2	4	3	5	500	5	1	4	3	0	22	0	5	73	0	0	70
8607	12583	23985	2	0	7.20055	0	90	85	98	2	102	93	19.5	1	2	133	79	78	84	84	72	7.5	16	-8	-8	-9	3	-25	-5.74526	-6	0	1	2	4	3	5	500	5	1	4	3	0	22	0	5	73	0	0	70
8607	12605	23985	3	0	7.20055	0	90	85	98	2	102	93	33.5	1	3	197	79	78	84	84	72	7.5	16	13	2	22	0	5	-8.88889	-2	1	2	3	1	3	5	300	8	1	6	4	7	52	0	6	35	0	0	0
8608	12583	23985	2	0	6.88022	1	87	85	93	3	108	111	1	1	1	182	107	109	106	109	93	10	16	6	2	11	-4	0	11.9512	9	0	1	2	4	3	5	500	5	1	4	3	0	22	0	5	73	0	0	70
8608	12583	23985	2	0	6.88022	1	87	85	93	3	108	111	1	1	2	134	107	109	106	109	93	10	16	-11	-5	-10	-3	-12	-8.61789	-17	0	1	2	4	3	5	500	5	1	4	3	0	22	0	5	73	0	0	70
8608	12694	23985	3	1	6.88022	1	87	85	93	3	108	111	6.5	1	3	196	107	109	106	109	93	10	16	5	-2	2	8	4	2.57576	20	1	2						7	1	6	5	13	52	0	0	35	0	0	35
8609	12583	23985	2	0	6.82272	1	107	102	110	3	87	96	13	1	1	182	89	90	101	84	83	2.5	20	14	1	19	2	-2	4.81707	4	0	1	2	4	3	5	500	5	1	4	3	0	22	0	5	73	0	0	70
8609	12583	23985	2	0	6.82272	1	107	102	110	3	87	96	13	1	2	134	89	90	101	84	83	2.5	20	-9	-11	-5	-13	-5	-0.650407	-14	0	1	2	4	3	5	500	5	1	4	3	0	22	0	5	73	0	0	70
8609	12606	23985	3	-1	6.82272	1	107	102	110	3	87	96	5.5	1	3	196	89	90	101	84	83	2.5	20	6	10	-3	24	-9	4.69697	6	1	2	2	1	3	5	325	6	1	6	4	0	81	6	0	13	0	0	0
8611	12583	23985	2	0	7.48528	1	96	102	91	2	109	95	20	1	1	182	103	100	107	101	85	17.5	8	3	1	6	-3	5	9.32927	8	0	1	2	4	3	5	500	5	1	4	3	0	22	0	5	73	0	0	70
8611	12583	23985	2	0	7.48528	1	96	102	91	2	109	95	20	1	2	133	103	100	107	101	85	17.5	8	-8	-3	-8	-5	-2	-0.162602	-6	0	1	2	4	3	5	500	5	1	4	3	0	22	0	5	73	0	0	70
8611	12694	23985	3	1	7.48528	1	96	102	91	2	109	95	17	1	3	197	103	100	107	101	85	17.5	8				4	1	2.87879	-10	1	2						7	1	6	5	13	52	0	0	35	0	0	35
8612	12583	23985	2	0	6.88022	1	96	84	108	4	93	101	17	1	1	182	123	102	127	129	107	17.5	26	3	0	-1	-15	8	23.9634	6	0	1	2	4	3	5	500	5	1	4	3	0	22	0	5	73	0	0	70
8612	12583	23985	2	0	6.88022	1	96	84	108	4	93	101	17	1	2	134	123	102	127	129	107	17.5	26	-5	-5	3	-7	-20	-25.9079	-18	0	1	2	4	3	5	500	5	1	4	3	0	22	0	5	73	0	0	70
8612	12605	23985	3	0	6.88022	1	96	84	108	4	93	101	27.5	1	3	196	123	102	127	129	107	17.5	26	6	6	0	12	1	20.8081	22	1	2	3	1	3	5	300	8	1	6	4	7	52	0	6	35	0	0	0
8613	12583	23985	2	0	6.81725	0	86	84	91	0	87	92	13	1	1	182	86	84	89	90	88	20	8	16	-1	10	15	17	28.7805	12	0	1	2	4	3	5	500	5	1	4	3	0	22	0	5	73	0	0	70
8613	12583	23985	2	0	6.81725	0	86	84	91	0	87	92	13	1	2	134	86	84	89	90	88	20	8	1	-1	5	-7	0	-11.0027	-8	0	1	2	4	3	5	500	5	1	4	3	0	22	0	5	73	0	0	70
8613	12605	23985	3	0	6.81725	0	86	84	91	0	87	92	11.5	1	3	196	86	84	89	90	88	20	8	-12	-6	-15	-1	-14	-17.3232	6	1	2	3	1	3	5	300	8	1	6	4	7	52	0	6	35	0	0	0
8614	12583	23985	2	0	6.98973	1	90	84	98	2	84	80	4	1	1	182	71	77	81	74	74	7.5	12	19	-1	4	38	10	9.57317	-2	0	1	2	4	3	5	500	5	1	4	3	0	22	0	5	73	0	0	70
8614	12583	23985	2	0	6.98973	1	90	84	98	2	84	80	4	1	2	134	71	77	81	74	74	7.5	12	-9	-9	-4	-21	-12	-10.4065	0	0	1	2	4	3	5	500	5	1	4	3	0	22	0	5	73	0	0	70
8614	12606	23985	3	-1	6.98973	1	90	84	98	2	84	80	3.5	1	3	196	71	77	81	74	74	7.5	12	-10	-8	-2	-19	-9	-2.12121	0	1	2	2	1	3	5	325	6	1	6	4	0	81	6	0	13	0	0	0
8615	12583	23985	2	0	7.41684	0	94	97	93	2	102	104	6.5	1	1	182	95	99	92	103	92	22.5	12	10	5	8	10	4	6.76829	3	0	1	2	4	3	5	500	5	1	4	3	0	22	0	5	73	0	0	70
8615	12583	23985	2	0	7.41684	0	94	97	93	2	102	104	6.5	1	2	133	95	99	92	103	92	22.5	12	-7	-8	2	-16	-4	-15.935	-3	0	1	2	4	3	5	500	5	1	4	3	0	22	0	5	73	0	0	70
8615	12605	23985	3	0	7.41684	0	94	97	93	2	102	104	7.5	1	3	197	95	99	92	103	92	22.5	12	11	3	6	17	-2	7.12121	4	1	2	3	1	3	5	300	8	1	6	4	7	52	0	6	35	0	0	0
8616	12583	23985	2	0	7.46886	0	111	114	104	4	107	105	1.5	1	1	182	123	104	130	101	108	32.5	22	7	2	0	15	9	38.2317	-2	0	1	2	4	3	5	500	5	1	4	3	0	22	0	5	73	0	0	70
8616	12583	23985	2	0	7.46886	0	111	114	104	4	107	105	1.5	1	2	133	123	104	130	101	108	32.5	22	-17	-4	-21	-1	-11	-26.2873	0	0	1	2	4	3	5	500	5	1	4	3	0	22	0	5	73	0	0	70
8616	12694	23985	3	1	7.46886	0	111	114	104	4	107	105	8	1	3	197	123	104	130	101	108	32.5	22	-18	-3	-14	-14	-22	-28.5354	6	1	2						7	1	6	5	13	52	0	0	35	0	0	35
8617	12583	23985	2	0	6.75428	1	104	93	114	4	128	106	0.5	1	1	182	118	124	123	106	104	32.5	24	10	-1	-1	22	10	16.2805	1	0	1	2	4	3	5	500	5	1	4	3	0	22	0	5	73	0	0	70
8617	12583	23985	2	0	6.75428	1	104	93	114	4	128	106	0.5	1	2	134	118	124	123	106	104	32.5	24	-3	-1	3	-10	-11	-31.0027	-1	0	1	2	4	3	5	500	5	1	4	3	0	22	0	5	73	0	0	70
8617	12605	23985	3	0	6.75428	1	104	93	114	4	128	106	6.5	1	3	196	118	124	123	106	104	32.5	24	-11	-3	-12	-6	-2	9.49495	0	1	2	3	1	3	5	300	8	1	6	4	7	52	0	6	35	0	0	0
8618	12593	23985	5	-1	10.5517	1	73	80	74	3	81	86		1	1		69	63	78	69	73	16.6667	14								1	1						8	1	4	3	0	38	0	0	57	5	0	62
8618	12593	23985	5	-1	10.5517	1	73	80	74	3	81	86		1	2		69	63	78	69	73	16.6667	14								1	1						8	1	4	3	0	38	0	0	57	5	0	62
8618	12378	23945			10.5517	1	73	80	74	3	81	86		1	3		69	63	78	69	73	16.6667	14
8619	12593	23985	5	-1	10.3901	0	88	85	94	2	95	86	10.5	1	1	183	76	88	91	66	73	21.4286	10	11	9	7	15	4	-10.7143	4	1	1						8	1	4	3	0	38	0	0	57	5	0	62
8619	12593	23985	5	-1	10.3901	0	88	85	94	2	95	86	10.5	1	2	133	76	88	91	66	73	21.4286	10	-6	0	-8	-2	0	1.65685	-10	1	1						8	1	4	3	0	38	0	0	57	5	0	62
8619	12607	23985	6	0	10.3901	0	88	85	94	2	95	86	14.5	1	3	198	76	88	91	66	73	21.4286	10	-2	1	-2	-4	4	10.1779	18	0	2	3	1	4	5	250	3	1	5	5	0	39	0	0	61	0	0	56
8620	12593	23985	5	-1	9.79877	1	110	124	93	3	97	87	4.5	1	1	183	98	88	109	90	83	15.4762	14	-7	-4	-6	-4	-8	-2.38095	8	1	1						8	1	4	3	0	38	0	0	57	5	0	62
8620	12593	23985	5	-1	9.79877	1	110	124	93	3	97	87	4.5	1	2	134	98	88	109	90	83	15.4762	14	1	2	0	4	-4	-7.9406	-8	1	1						8	1	4	3	0	38	0	0	57	5	0	62
8620	12607	23985	6	0	9.79877	1	110	124	93	3	97	87	17.5	1	3	197	98	88	109	90	83	15.4762	14	0	2	0	-1	3	5.62967	10	0	2	3	1	4	5	250	3	1	5	5	0	39	0	0	61	0	0	56
8621	12593	23985	5	-1	9.95483	0	127	129	118	3	105	100		1	1	183	111	107	114	103	101	33.3333	16	-3	2	-3	3	-7	7.14286	10	1	1						8	1	4	3	0	38	0	0	57	5	0	62
8621	12593	23985	5	-1	9.95483	0	127	129	118	3	105	100		1	2		111	107	114	103	101	33.3333	16								1	1						8	1	4	3	0	38	0	0	57	5	0	62
8621	12378	23945			9.95483	0	127	129	118	3	105	100		1	3		111	107	114	103	101	33.3333	16
8622	12593	23985	5	-1	9.82067	1	103	108	96	3	100	77	16.5	1	1	183	82	83	88	79	83	9.52381	10	4	4	5	6	-3	5.95238	2	1	1						8	1	4	3	0	38	0	0	57	5	0	62
8622	12593	23985	5	-1	9.82067	1	103	108	96	3	100	77	16.5	1	2	134	82	83	88	79	83	9.52381	10	1	4	-1	1	5	-4.13598	4	1	1						8	1	4	3	0	38	0	0	57	5	0	62
8622	12585	23985	6	0	9.82067	1	103	108	96	3	100	77	15	1	3	197	82	83	88	79	83	9.52381	10	0	-1	6	-11	5	17.0912	2	0	2	2	1	3	5	400	7	1	6	4	0	26	0	0	29	45	0	74
8623	12593	23985	5	-1	10.3436	1	91	95	90	3	80	83	17.5	1	1	183	92	76	99	86	93	9.52381	12	3	4	1	2	4	3.57143	6	1	1						8	1	4	3	0	38	0	0	57	5	0	62
8623	12593	23985	5	-1	10.3436	1	91	95	90	3	80	83	17.5	1	2	133	92	76	99	86	93	9.52381	12	-9	-3	-10	-6	2	-2.78596	-10	1	1						8	1	4	3	0	38	0	0	57	5	0	62
8623	12607	23985	6	0	10.3436	1	91	95	90	3	80	83	13	1	3	220	92	76	99	86	93	9.52381	12	-2	-2	3	-13	7	4.3966	-2	0	2	3	1	4	5	250	3	1	5	5	0	39	0	0	61	0	0	56
8624	12593	23985	5	-1	9.82341	1	99	102	96	3	104	96		1	1	183	96	99	94	101	94	15.4762	10	1	3	-1	6	-2	11.9048	14	1	1						8	1	4	3	0	38	0	0	57	5	0	62
8624	12593	23985	5	-1	9.82341	1	99	102	96	3	104	96		1	2		96	99	94	101	94	15.4762	10								1	1						8	1	4	3	0	38	0	0	57	5	0	62
8624	12378	23945			9.82341	1	99	102	96	3	104	96		1	3		96	99	94	101	94	15.4762	10
8625	12593	23985	5	-1	10.5133	0	89	88	93	2	104	100	5.5	1	1	183	100	86	99	97	107	16.6667	16	-3	6	-4	-7	9	22.619	8	1	1						8	1	4	3	0	38	0	0	57	5	0	62
8625	12593	23985	5	-1	10.5133	0	89	88	93	2	104	100	5.5	1	2	133	100	86	99	97	107	16.6667	16	-7	-4	3	-13	-14	-22.7909	-12	1	1						8	1	4	3	0	38	0	0	57	5	0	62
8625	12585	23985	6	0	10.5133	0	89	88	93	2	104	100	10	1	3	198	100	86	99	97	107	16.6667	16	3	-5	-4	7	10	2.13261	4	0	2	2	1	3	5	400	7	1	6	4	0	26	0	0	29	45	0	74
8626	12593	23985	5	-1	9.85079	1	86	87	88	3	102	96	20	1	1	183	96	93	94	104	94	14.2857	10	-9	0	-9	-12	1	7.14286	6	1	1						8	1	4	3	0	38	0	0	57	5	0	62
8626	12593	23985	5	-1	9.85079	1	86	87	88	3	102	96	20	1	2	133	96	93	94	104	94	14.2857	10	1	1	11	-10	-5	-12.1502	-8	1	1						8	1	4	3	0	38	0	0	57	5	0	62
8626	12585	23985	6	0	9.85079	1	86	87	88	3	102	96	37.5	1	3	198	96	93	94	104	94	14.2857	10	2	4	-4	3	13	0.525571	8	0	2	2	1	3	5	400	7	1	6	4	0	26	0	0	29	45	0	74
8627	12584	23985	5	0	10.2122	0	82	76	93	3	97	81	4	1	1	182	88	79	99	75	88	19.0476	12	1	3	-7	15	-2	1.40693	10	1	1	2	1	4	5	310	9	1	6	5	2	52	0	0	46	0	0	46
8627	12584	23985	5	0	10.2122	0	82	76	93	3	97	81	4	1	2	133	88	79	99	75	88	19.0476	12	1	0	5	-7	8	-8.08341	-8	1	1	2	1	4	5	310	9	1	6	5	2	52	0	0	46	0	0	46
8627	12607	23985	6	0	10.2122	0	82	76	93	3	97	81	5.5	1	3	198	88	79	99	75	88	19.0476	12	-5	-3	-2	-10	-1	3.31514	4	0	2	3	1	4	5	250	3	1	5	5	0	39	0	0	61	0	0	56
8628	12584	23985	5	0	9.73306	1	96	89	104	3	88	97	17	1	1	182	93	94	100	87	88	17.8571	6	3	4	1	10	-6	-1.94805	12	1	1	2	1	4	5	310	9	1	6	5	2	52	0	0	46	0	0	46
8628	12584	23985	5	0	9.73306	1	96	89	104	3	88	97	17	1	2	134	93	94	100	87	88	17.8571	6	-7	-4	-9	-7	5	0.585754	-8	1	1	2	1	4	5	310	9	1	6	5	2	52	0	0	46	0	0	46
8628	12607	23985	6	0	9.73306	1	96	89	104	3	88	97	18	1	3	197	93	94	100	87	88	17.8571	6	1	0	5	-4	0	0.171821	10	0	2	3	1	4	5	250	3	1	5	5	0	39	0	0	61	0	0	56
8629	12584	23985	5	0	10.1492	1	96	106	86	2	76	84	5.5	1	1	182	81	86	89	80	77	15.4762	8	1	0	1	-1	2	1.56926	12	1	1	2	1	4	5	310	9	1	6	5	2	52	0	0	46	0	0	46
8629	12584	23985	5	0	10.1492	1	96	106	86	2	76	84	5.5	1	2	133	81	86	89	80	77	15.4762	8	2	-1	3	1	0	-6.73618	-10	1	1	2	1	4	5	310	9	1	6	5	2	52	0	0	46	0	0	46
8629	12607	23985	6	0	10.1492	1	96	106	86	2	76	84	10.5	1	3	198	81	86	89	80	77	15.4762	8	-3	1	0	-7	-1	18.1221	8	0	2	3	1	4	5	250	3	1	5	5	0	39	0	0	61	0	0	56
8630	12584	23985	5	0	9.77139	1	85	81	93	4	110	96	4	1	1	182	85	105	85	83	104	21.4286	12	14	0	21	10	-12	0.162338	2	1	1	2	1	4	5	310	9	1	6	5	2	52	0	0	46	0	0	46
8630	12584	23985	5	0	9.77139	1	85	81	93	4	110	96	4	1	2	134	85	105	85	83	104	21.4286	12	-2	1	-7	0	8	-2.00328	-4	1	1	2	1	4	5	310	9	1	6	5	2	52	0	0	46	0	0	46
8630	12607	23985	6	0	9.77139	1	85	81	93	4	110	96	2.5	1	3	197	85	105	85	83	104	21.4286	12	2	4	10	-4	-4	-2.92096	8	0	2	3	1	4	5	250	3	1	5	5	0	39	0	0	61	0	0	56
8631	12584	23985	5	0	10.5845	0			103	3	118	122	0	1	1	182	95	97	106	80	101	45.2381	16	0	7	-5	3	2	-11.1472	12	1	1	2	1	4	5	310	9	1	6	5	2	52	0	0	46	0	0	46
8631	12584	23985	5	0	10.5845	0			103	3	118	122	0	1	2	135	95	97	106	80	101	45.2381	16	7	-4	2	11	8	-17.5961	0	1	1	2	1	4	5	310	9	1	6	5	2	52	0	0	46	0	0	46
8631	12607	23985	6	0	10.5845	0			103	3	118	122	0	1	3	196	95	97	106	80	101	45.2381	16	4	5	2	4	2	11.9365	2	0	2	3	1	4	5	250	3	1	5	5	0	39	0	0	61	0	0	56
8632	12584	23985	5	0	10.6146	1	99	92	105	3	104	108	2	1	1	182	97	102	104	87	99	27.381	22	3	1	-1	7	5	-6.92641	10	1	1	2	1	4	5	310	9	1	6	5	2	52	0	0	46	0	0	46
8632	12584	23985	5	0	10.6146	1	99	92	105	3	104	108	2	1	2	134	97	102	104	87	99	27.381	22	-3	3	-4	-3	2	-1.89784	-12	1	1	2	1	4	5	310	9	1	6	5	2	52	0	0	46	0	0	46
8632	12607	23985	6	0	10.6146	1	99	92	105	3	104	108	10.5	1	3	197	97	102	104	87	99	27.381	22	4	5	-1	7	6	-0.909642	0	0	2	3	1	4	5	250	3	1	5	5	0	39	0	0	61	0	0	56
8633	12584	23985	5	0	10.1574	0	93	90	97	3	100	91	9	1	1	182	95	88	102	83	104	13.0952	16	-3	0	-3	-4	-2	0.541126	4	1	1	2	1	4	5	310	9	1	6	5	2	52	0	0	46	0	0	46
8633	12584	23985	5	0	10.1574	0	93	90	97	3	100	91	9	1	2	133	95	88	102	83	104	13.0952	16	4	6	0	4	14	-9.51265	-2	1	1	2	1	4	5	310	9	1	6	5	2	52	0	0	46	0	0	46
8633	12607	23985	6	0	10.1574	0	93	90	97	3	100	91	17	1	3	198	95	88	102	83	104	13.0952	16	1	-5	2	4	-10	12.543	8	0	2	3	1	4	5	250	3	1	5	5	0	39	0	0	61	0	0	56
8634	12584	23985	5	0	10.1492	1	133	138	119	7	80	94		1	1	182	98	115	107	94	82	25	20	-7	-8	1	-11	-13	1.13636	2	1	1	2	1	4	5	310	9	1	6	5	2	52	0	0	46	0	0	46
8634	12584	23985	5	0	10.1492	1	133	138	119	7	80	94		1	2		98	115	107	94	82	25	20								1	1	2	1	4	5	310	9	1	6	5	2	52	0	0	46	0	0	46
8634	12378	23945			10.1492	1	133	138	119	7	80	94		1	3		98	115	107	94	82	25	20
8635	12584	23985	5	0	9.68925	0	112	110	110	4	91	80	2.5	1	1	182	103	104	108	99	91	13.0952	18	1	11	5	-1	-5	18.7229	10	1	1	2	1	4	5	310	9	1	6	5	2	52	0	0	46	0	0	46
8635	12584	23985	5	0	9.68925	0	112	110	110	4	91	80	2.5	1	2	133	103	104	108	99	91	13.0952	18	2	4	0	3	6	-24.6017	-10	1	1	2	1	4	5	310	9	1	6	5	2	52	0	0	46	0	0	46
8635	12607	23985	6	0	9.68925	0	112	110	110	4	91	80	10	1	3	198	103	104	108	99	91	13.0952	18	-8	-3	-4	-15	4	10.4306	20	0	2	3	1	4	5	250	3	1	5	5	0	39	0	0	61	0	0	56
8636	12584	23985	5	0	10.3436	1	90	82	100	6	110	96	19	1	1	182	92	92	101	82	94	23.8095	10	1	0	-5	10	-3	-3.35498	8	1	1	2	1	4	5	310	9	1	6	5	2	52	0	0	46	0	0	46
8636	12584	23985	5	0	10.3436	1	90	82	100	6	110	96	19	1	2	133	92	92	101	82	94	23.8095	10	-1	4	4	-6	-4	-8.08341	-4	1	1	2	1	4	5	310	9	1	6	5	2	52	0	0	46	0	0	46
8636	12607	23985	6	0	10.3436	1	90	82	100	6	110	96	20.5	1	3	220	92	92	101	82	94	23.8095	10	2	4	-5	6	14	3.31514	6	0	2	3	1	4	5	250	3	1	5	5	0	39	0	0	61	0	0	56
8637	12584	23985	5	0	9.68378	0	111	101	117	5	109	104	10.5	1	1	182	116	111	117	103	117	33.3333	14	8	3	5	10	1	5.30303	8	1	1	2	1	4	5	310	9	1	6	5	2	52	0	0	46	0	0	46
8637	12584	23985	5	0	9.68378	0	111	101	117	5	109	104	10.5	1	2	133	116	111	117	103	117	33.3333	14	-6	2	-3	-12	3	-18.0178	-4	1	1	2	1	4	5	310	9	1	6	5	2	52	0	0	46	0	0	46
8637	12607	23985	6	0	9.68378	0	111	101	117	5	109	104	17.5	1	3	198	116	111	117	103	117	33.3333	14	-5	4	-9	3	0	5.85203	12	0	2	3	1	4	5	250	3	1	5	5	0	39	0	0	61	0	0	56
8638	12584	23985	5	0	10.2916	1	92	82	104	4	100	102	19.5	1	1	182	95	110	101	86	97	29.7619	16	1	-2	2	0	2	-8.171	0	1	1	2	1	4	5	310	9	1	6	5	2	52	0	0	46	0	0	46
8638	12584	23985	5	0	10.2916	1	92	82	104	4	100	102	19.5	1	2	133	95	110	101	86	97	29.7619	16	-1	0	-3	0	3	-9.21978	-10	1	1	2	1	4	5	310	9	1	6	5	2	52	0	0	46	0	0	46
8638	12585	23985	6	0	10.2916	1	92	82	104	4	100	102	9.5	1	3	198	95	110	101	86	97	29.7619	16	1	7	2	0	1	7.23671	14	0	2	2	1	3	5	400	7	1	6	4	0	26	0	0	29	45	0	74
8639	12584	23985	5	0	10.6557	1	87	80	98	2	107	105	7	1	1	182	84	97	92	76	89	25	10	2	2	5	0	-4	-4.54545	2	1	1	2	1	4	5	310	9	1	6	5	2	52	0	0	46	0	0	46
8639	12584	23985	5	0	10.6557	1	87	80	98	2	107	105	7	1	2	134	84	97	92	76	89	25	10	3	-4	2	4	0	-10.1453	-4	1	1	2	1	4	5	310	9	1	6	5	2	52	0	0	46	0	0	46
8639	12607	23985	6	0	10.6557	1	87	80	98	2	107	105	12	1	3	197	84	97	92	76	89	25	10	-5	2	-5	-3	2	19.1025	6	0	2	3	1	4	5	250	3	1	5	5	0	39	0	0	61	0	0	56
8640	12585	23985	5	0	10.0753	1	111	115	103	5	104	98	3.5	1	1	187	99	104	109	84	101	11.3636	18	0	6	-5	6	1	6.49351	8	0	1	2	1	3	5	300	8	1	5	4	2	39	0	0	59	0	0	51
8640	12585	23985	5	0	10.0753	1	111	115	103	5	104	98	3.5	1	2	132	99	104	109	84	101	11.3636	18	-2	4	0	-3	-2	-7.54786	-6	0	1	2	1	3	5	300	8	1	5	4	2	39	0	0	59	0	0	51
8640	12585	23985	6	0	10.0753	1	111	115	103	5	104	98	8.5	1	3	198	99	104	109	84	101	11.3636	18	0	-2	-3	3	2	-4.42693	12	0	2	2	1	3	5	400	7	1	6	4	0	26	0	0	29	45	0	74
8642	12585	23985	5	0	10.0507	1	101	105	96	4	109	100	8.5	1	1	189	118	97	116	106	121	19.3182	20	3	4	-1	0	14	10.4437	14	0	1	2	1	3	5	300	8	1	5	4	2	39	0	0	59	0	0	51
8642	12585	23985	5	0	10.0507	1	101	105	96	4	109	100	8.5	1	2	130	118	97	116	106	121	19.3182	20	1	3	2	0	1	-20.4836	-18	0	1	2	1	3	5	300	8	1	5	4	2	39	0	0	59	0	0	51
8642	12607	23985	6	0	10.0507	1	101	105	96	4	109	100	13	1	3	198	118	97	116	106	121	19.3182	20	4	3	-1	6	6	24.055	16	0	2	3	1	4	5	250	3	1	5	5	0	39	0	0	61	0	0	56
8643	12585	23985	5	0	9.71116	1	94	96	93	3	91	96	10.5	1	1	187	100	90	102	95	104	12.5	6	-4	1	-5	-4	2	27.9762	8	0	1	2	1	3	5	300	8	1	5	4	2	39	0	0	59	0	0	51
8643	12585	23985	5	0	9.71116	1	94	96	93	3	91	96	10.5	1	2	133	100	90	102	95	104	12.5	6	2	-3	2	2	-1	-29.136	-4	0	1	2	1	3	5	300	8	1	5	4	2	39	0	0	59	0	0	51
8643	12585	23985	6	0	9.71116	1	94	96	93	3	91	96	12.5	1	3	197	100	90	102	95	104	12.5	6	-2	5	0	-3	-2	19.052	4	0	2	2	1	3	5	400	7	1	6	4	0	26	0	0	29	45	0	74
8644	12585	23985	5	0	10.5599	0	110	99	117	6	127	114	7.5	1	1	187	103	122	104	97	108	28.4091	14	10	11	10	3	7	16.829	10	0	1	2	1	3	5	300	8	1	5	4	2	39	0	0	59	0	0	51
8644	12585	23985	5	0	10.5599	0	110	99	117	6	127	114	7.5	1	2	134	103	122	104	97	108	28.4091	14	-5	0	-4	-3	-2	-29.7742	2	0	1	2	1	3	5	300	8	1	5	4	2	39	0	0	59	0	0	51
8644	12585	23985	6	0	10.5599	0	110	99	117	6	127	114	20.5	1	3	196	103	122	104	97	108	28.4091	14	10	0	7	11	2	3.16353	10	0	2	2	1	3	5	400	7	1	6	4	0	26	0	0	29	45	0	74
8645	12585	23985	5	0	9.94114	0	92	97	89	4	118	114	13.5	1	1	187	109	99	111	100	111	50	20	3	3	0	3	3	-13.0952	8	0	1	2	1	3	5	300	8	1	5	4	2	39	0	0	59	0	0	51
8645	12585	23985	5	0	9.94114	0	92	97	89	4	118	114	13.5	1	2	133	109	99	111	100	111	50	20	-8	8	-9	-4	-2	-23.5027	-4	0	1	2	1	3	5	300	8	1	5	4	2	39	0	0	59	0	0	51
8645	12585	23985	6	0	9.94114	0	92	97	89	4	118	114	24.5	1	3	197	109	99	111	100	111	50	20	3	-7	0	2	7	9.14696	8	0	2	2	1	3	5	400	7	1	6	4	0	26	0	0	29	45	0	74
8646	12585	23985	5	0	9.80424	0	124	117	124	4	118	114	1.5	1	1	187	103	115	111	94	97	9.09091	28	7	9	-3	21	-2	7.57576	4	0	1	2	1	3	5	300	8	1	5	4	2	39	0	0	59	0	0	51
8646	12585	23985	5	0	9.80424	0	124	117	124	4	118	114	1.5	1	2	133	103	115	111	94	97	9.09091	28	-8	-3	-1	-16	-6	-0.171821	-16	0	1	2	1	3	5	300	8	1	5	4	2	39	0	0	59	0	0	51
8646	12585	23985	6	0	9.80424	0	124	117	124	4	118	114	9	1	3	197	103	115	111	94	97	9.09091	28	2	5	0	4	7	-11.5929	6	0	2	2	1	3	5	400	7	1	6	4	0	26	0	0	29	45	0	74
8647	12585	23985	5	0	9.73032	0	80	80	86	2	127	102	16	1	1	187	94	100	95	91	102	3.40909	8	4	-1	6	-1	4	18.0195	2	0	1	2	1	3	5	300	8	1	5	4	2	39	0	0	59	0	0	51
8647	12585	23985	5	0	9.73032	0	80	80	86	2	127	102	16	1	2	133	94	100	95	91	102	3.40909	8	-4	11	-4	-4	0	-12.1502	-2	0	1	2	1	3	5	300	8	1	5	4	2	39	0	0	59	0	0	51
8647	12585	23985	6	0	9.73032	0	80	80	86	2	127	102	15	1	3	197	94	100	95	91	102	3.40909	8	2	0	0	7	-4	6.40792	10	0	2	2	1	3	5	400	7	1	6	4	0	26	0	0	29	45	0	74
8648	12482	23985	5	0	9.72758	0	102	89	114	3	100	84	12.5	1	1	187	86	90	95	80	85	3.40909	8	5	2	4	6	1	2.54329	8	1	1	2	2	4	5	300	6	1	6	5	23	63	0	0	14	0	0	14
8648	12482	23985	5	0	9.72758	0	102	89	114	3	100	84	12.5	1	2	133	86	90	95	80	85	3.40909	8	-4	-2	-2	-3	-11	-1.82867	-8	1	1	2	2	4	5	300	6	1	6	5	23	63	0	0	14	0	0	14
8648	12585	23985	6	0	9.72758	0	102	89	114	3	100	84	10.5	1	3	197	86	90	95	80	85	3.40909	8	-2	2	-4	3	1	3.71943	4	0	2	2	1	3	5	400	7	1	6	4	0	26	0	0	29	45	0	74
8649	12482	23985	5	0	9.82888	1	133	126	131	3	107	98	1	1	1	187	101	131	107	94	99	12.5	16	10	-2	7	13	-1	31.5476	18	1	1	2	2	4	5	300	6	1	6	5	23	63	0	0	14	0	0	14
8649	12482	23985	5	0	9.82888	1	133	126	131	3	107	98	1	1	2	133	101	131	107	94	99	12.5	16	-10	2	-15	0	-2	-38.893	-18	1	1	2	2	4	5	300	6	1	6	5	23	63	0	0	14	0	0	14
8649	12585	23985	6	0	9.82888	1	133	126	131	3	107	98	12	1	3	197	101	131	107	94	99	12.5	16	5	-3	11	-12	10	4.64928	12	0	2	2	1	3	5	400	7	1	6	4	0	26	0	0	29	45	0	74
8650	12482	23985	5	0	9.82888	1	112	97	123	7	111	92	3	1	1	187	98	118	106	93	87	22.7273	18	4	10	-3	7	16	-0.108225	4	1	1	2	2	4	5	300	6	1	6	5	23	63	0	0	14	0	0	14
8650	12482	23985	5	0	9.82888	1	112	97	123	7	111	92	3	1	2	133	98	118	106	93	87	22.7273	18	2	5	6	-7	2	-8.18606	-16	1	1	2	2	4	5	300	6	1	6	5	23	63	0	0	14	0	0	14
8650	12585	23985	6	0	9.82888	1	112	97	123	7	111	92	10.5	1	3	197	98	118	106	93	87	22.7273	18	2	-3	-1	9	-4	3.21407	20	0	2	2	1	3	5	400	7	1	6	4	0	26	0	0	29	45	0	74
8651	12482	23985	5	0	9.91376	0	85	84	90	2	97	86	10	1	1	187	108	101	110	103	103	25	16	-7	6	-10	-4	1	9.52381	2	1	1	2	2	4	5	300	6	1	6	5	23	63	0	0	14	0	0	14
8651	12482	23985	5	0	9.91376	0	85	84	90	2	97	86	10	1	2	133	108	101	110	103	103	25	16	3	-3	2	7	-4	-12.8743	-8	1	1	2	2	4	5	300	6	1	6	5	23	63	0	0	14	0	0	14
8651	12585	23985	6	0	9.91376	0	85	84	90	2	97	86	9	1	3	197	108	101	110	103	103	25	16	1	2	2	-11	19	8.74267	14	0	2	2	1	3	5	400	7	1	6	4	0	26	0	0	29	45	0	74
8652	12482	23985	5	0	9.80424	1	98	100	96		109	98	9	1	1	187	102	112	104	97	103	4.54545	12	-7	5	-3	-8	-9	1.40693	6	1	1	2	2	4	5	300	6	1	6	5	23	63	0	0	14	0	0	14
8652	12482	23985	5	0	9.80424	1	98	100	96		109	98	9	1	2	133	102	112	104	97	103	4.54545	12	-4	5	-9	4	-1	7.44968	-8	1	1	2	2	4	5	300	6	1	6	5	23	63	0	0	14	0	0	14
8652	12585	23985	6	0	9.80424	1	98	100	96		109	98	13.5	1	3	197	102	112	104	97	103	4.54545	12	6	3	8	-4	12	-3.59814	4	0	2	2	1	3	5	400	7	1	6	4	0	26	0	0	29	45	0	74
8653	12482	23985	5	0	10.2971	0	97	100	95	4	127	118		1	1	187	90	95	99	78	99	0	16	-2	4	-5	4	-3	28.5714	4	1	1	2	2	4	5	300	6	1	6	5	23	63	0	0	14	0	0	14
8653	12482	23985	5	0	10.2971	0	97	100	95	4	127	118		1	2		90	95	99	78	99	0	16								1	1	2	2	4	5	300	6	1	6	5	23	63	0	0	14	0	0	14
8653	12378	23945			10.2971	0	97	100	95	4	127	118		1	3		90	95	99	78	99	0	16
8654	12482	23985	5	0	10.5927	1	71	53	47	3	102	100	5.5	1	1	187	88	78	95	79	97	18.1818	10	-9	-1	-10	-3	-8	17.5325	12	1	1	2	2	4	5	300	6	1	6	5	23	63	0	0	14	0	0	14
8654	12482	23985	5	0	10.5927	1	71	53	47	3	102	100	5.5	1	2	134	88	78	95	79	97	18.1818	10	9	4	11	5	4	-13.0339	-16	1	1	2	2	4	5	300	6	1	6	5	23	63	0	0	14	0	0	14
8654	12607	23985	6	0	10.5927	1	71	53	47	3	102	100	6	1	3	196	88	78	95	79	97	18.1818	10	-4	1	-11	3	5	-3.07257	6	0	2	3	1	4	5	250	3	1	5	5	0	39	0	0	61	0	0	56
8655	12482	23985	5	0	10.4449	0	114	114	110	5	115	108	11	1	1	187	111	106	115	98	111	21.5909	22	5	10	2	8	3	9.36147	12	1	1	2	2	4	5	300	6	1	6	5	23	63	0	0	14	0	0	14
8655	12482	23985	5	0	10.4449	0	114	114	110	5	115	108	11	1	2	131	111	106	115	98	111	21.5909	22	-6	6	-9	-5	2	-16.5194	-10	1	1	2	2	4	5	300	6	1	6	5	23	63	0	0	14	0	0	14
8655	12585	23985	6	0	10.4449	0	114	114	110	5	115	108	10.5	1	3	221	111	106	115	98	111	21.5909	22	-7	-2	-6	-6	0	17.92	10	0	2	2	1	3	5	400	7	1	6	4	0	26	0	0	29	45	0	74
8656	12482	23985	5	0	10.2423	0	100	85	114	2	95	84	10.5	1	1	187	89	77	101	83	70	11.3636	4	-7	2	0	-12	-7	-6.60173	12	1	1	2	2	4	5	300	6	1	6	5	23	63	0	0	14	0	0	14
8656	12482	23985	5	0	10.2423	0	100	85	114	2	95	84	10.5	1	2	132	89	77	101	83	70	11.3636	4	-8	-7	-6	-6	-7		-12	1	1	2	2	4	5	300	6	1	6	5	23	63	0	0	14	0	0	14
8656	12585	23985	6	0	10.2423	0	100	85	114	2	95	84	11	1	3	198	89	77	101	83	70	11.3636	4	8	-2	-5	17	15		4	0	2	2	1	3	5	400	7	1	6	4	0	26	0	0	29	45	0	74
8657	12585	23985	5	0	10.6585	0	80	96	70	4	111	87	13.5	1	1	187	77	77	84	72	90	10.2273	6	-1	0	3	-4	-10	-4.27489	8	0	1	2	1	3	5	300	8	1	5	4	2	39	0	0	59	0	0	51
8657	12585	23985	5	0	10.6585	0	80	96	70	4	111	87	13.5	1	2	134	77	77	84	72	90	10.2273	6	-3	-2	-7	2	4	2.29504	-8	0	1	2	1	3	5	300	8	1	5	4	2	39	0	0	59	0	0	51
8657	12607	23985	6	0	10.6585	0	80	96	70	4	111	87	29	1	3	196	77	77	84	72	90	10.2273	6	7	2	9	0	7	-1.38468	0	0	2	3	1	4	5	250	3	1	5	5	0	39	0	0	61	0	0	56
8658	12481	23947	2	0	6.93224	0	118	111	119	3	109	103	12	1	1	167	125	117	122	118	115	30	26	-4	-4	-1	-6	-7	-17.8049	14	1	1	2	1	4	5	300	4	0	5	4	4	0	20	3	60	13	0	74
8658	12481	23947	2	0	6.93224	0	118	111	119	3	109	103	12	1	2	158	125	117	122	118	115	30	26	-6	2	1	-7	-19	14.4715	-22	1	1	2	1	4	5	300	4	0	5	4	4	0	20	3	60	13	0	74
8658	12608	23947	3	0	6.93224	0	118	111	119	3	109	103	12	1	3	192	125	117	122	118	115	30	26	-13	-3	-17	-4	0	-3.93939	0	1	2	2	2	3	5	300	8	0	4	3	27	0	42	0	0	31	0	31
8659	12481	23947	2	0	7.17864	0	112	105	115	2	104	110	5	1	1	167	113	114	107	113	115	22.5	24	8	-3	19	-5	-11	9.20732	10	1	1	2	1	4	5	300	4	0	5	4	4	0	20	3	60	13	0	74
8659	12481	23947	2	0	7.17864	0	112	105	115	2	104	110	5	1	2	157	113	114	107	113	115	22.5	24	-1	1	-2	-3	5	-2.81843	-6	1	1	2	1	4	5	300	4	0	5	4	4	0	20	3	60	13	0	74
8659	12608	23947	3	0	7.17864	0	112	105	115	2	104	110	8.5	1	3	193	113	114	107	113	115	22.5	24	-6	0	-2	-12	6	2.92929	4	1	2	2	2	3	5	300	8	0	4	3	27	0	42	0	0	31	0	31
8660	12481	23947	2	0	7.07734	0	110	102	114	3	100	97	19	1	1	167	97	117	91	106	104	15	16	8	-1	18	-6	-9	-0.365854	10	1	1	2	1	4	5	300	4	0	5	4	4	0	20	3	60	13	0	74
8660	12481	23947	2	0	7.07734	0	110	102	114	3	100	97	19	1	2	158	97	117	91	106	104	15	16	3	-3	8	-2	-8	-5.74526	-8	1	1	2	1	4	5	300	4	0	5	4	4	0	20	3	60	13	0	74
8660	12608	23947	3	0	7.07734	0	110	102	114	3	100	97	17	1	3	192	97	117	91	106	104	15	16	-5	0	-7	0	-3	4.74747	10	1	2	2	2	3	5	300	8	0	4	3	27	0	42	0	0	31	0	31
8661	12481	23947	2	0	7.35934	0	91	91	93	2	59	77	4	1	1	167	74	71	84	71	77	15	10	6	3	-1	14	-6	-7.68293	2	1	1	2	1	4	5	300	4	0	5	4	4	0	20	3	60	13	0	74
8661	12481	23947	2	0	7.35934	0	91	91	93	2	59	77	4	1	2	157	74	71	84	71	77	15	10	-4	-1	-4	0	-4	-7.31707	6	1	1	2	1	4	5	300	4	0	5	4	4	0	20	3	60	13	0	74
8661	12608	23947	3	0	7.35934	0	91	91	93	2	59	77	6.5	1	3	193	74	71	84	71	77	15	10	6	-1	9	2	-4	9.09091	-8	1	2	2	2	3	5	300	8	0	4	3	27	0	42	0	0	31	0	31
8662	12481	23947	2	0	7.28542	0	102	97	105	2	89	92	7.5	1	1	167	94	66	88	105	102	7.5	10	-11	6	-4	-18	-11	7.13415	6	1	1	2	1	4	5	300	4	0	5	4	4	0	20	3	60	13	0	74
8662	12481	23947	2	0	7.28542	0	102	97	105	2	89	92	7.5	1	2	157	94	66	88	105	102	7.5	10	-5	-2	-4	-6	-5	-3.52304	-4	1	1	2	1	4	5	300	4	0	5	4	4	0	20	3	60	13	0	74
8662	12608	23947	3	0	7.28542	0	102	97	105	2	89	92	11.5	1	3	193	94	66	88	105	102	7.5	10	-9	-3	-3	-17	-4	-2.0202	-2	1	2	2	2	3	5	300	8	0	4	3	27	0	42	0	0	31	0	31
8663	12481	23947	2	0	7.4935	1	67	74	68	0	76	82	6.5	1	1	167	49	59	69	35	70	15	0	20	14	2	44	-5	-15	16	1	1	2	1	4	5	300	4	0	5	4	4	0	20	3	60	13	0	74
8663	12481	23947	2	0	7.4935	1	67	74	68	0	76	82	6.5	1	2	157	49	59	69	35	70	15	0	2	-2	-6	13	6	0	-6	1	1	2	1	4	5	300	4	0	5	4	4	0	20	3	60	13	0	74
8663	12608	23947	3	0	7.4935	1	67	74	68	0	76	82	12	1	3	193	49	59	69	35	70	15	0	-14	0	0	-31	-10	0	0	1	2	2	2	3	5	300	8	0	4	3	27	0	42	0	0	31	0	31
8664	12481	23947	2	0	7.33196	1	82	76	93	1	78	91	10.5	1	1	167	69	80	74	73	78	0	12	1	5	7	-11	-1	2.43902	-2	1	1	2	1	4	5	300	4	0	5	4	4	0	20	3	60	13	0	74
8664	12481	23947	2	0	7.33196	1	82	76	93	1	78	91	10.5	1	2	157	69	80	74	73	78	0	12	6	-8	-2	18	-2		0	1	1	2	1	4	5	300	4	0	5	4	4	0	20	3	60	13	0	74
8664	12608	23947	3	0	7.33196	1	82	76	93	1	78	91	9	1	3	193	69	80	74	73	78	0	12	-8	3	-5	-7	-14		2	1	2	2	2	3	5	300	8	0	4	3	27	0	42	0	0	31	0	31
8665	12481	23947	2	0	7.01164	0	90	81	101	3	98	94	11	1	1	167	96	102	100	91	109	20	14	8	5	6	9	-7	-0.487805	8	1	1	2	1	4	5	300	4	0	5	4	4	0	20	3	60	13	0	74
8665	12481	23947	2	0	7.01164	0	90	81	101	3	98	94	11	1	2	158	96	102	100	91	109	20	14	-11	-5	-2	-20	-11	-15.0678	-4	1	1	2	1	4	5	300	4	0	5	4	4	0	20	3	60	13	0	74
8665	12608	23947	3	0	7.01164	0	90	81	101	3	98	94	13	1	3	192	96	102	100	91	109	20	14	7	-3	2	10	9	2.37374	0	1	2	2	2	3	5	300	8	0	4	3	27	0	42	0	0	31	0	31
8666	12481	23947	2	0	7.38946	0	103	100	105	3	103	90	6	1	1	159	107	99	105	109	102	22.5	12	9	3	16	-4	-2	9.20732	16	1	1	2	1	4	5	300	4	0	5	4	4	0	20	3	60	13	0	74
8666	12481	23947	2	0	7.38946	0	103	100	105	3	103	90	6	1	2	165	107	99	105	109	102	22.5	12	-8	-5	-6	-8	-1	-0.596206	-4	1	1	2	1	4	5	300	4	0	5	4	4	0	20	3	60	13	0	74
8666	12608	23947	3	0	7.38946	0	103	100	105	3	103	90	4	1	3	193	107	99	105	109	102	22.5	12	-7	-3	-4	-7	-5	-19.7475	6	1	2	2	2	3	5	300	8	0	4	3	27	0	42	0	0	31	0	31
8667	12482	23947	5	0	10.141	1	99	90	107	3	97	98	8.5	1	1	168	101	94	109	94	95	22.619	20	-2	7	-6	-1	4	16.0173	2	1	1	2	2	4	5	300	6	1	6	5	23	63	0	0	14	0	0	14
8667	12482	23947	5	0	10.141	1	99	90	107	3	97	98	8.5	1	2	181	101	94	109	94	95	22.619	20	-2	-5	2	-7	-2	-15.956	-6	1	1	2	2	4	5	300	6	1	6	5	23	63	0	0	14	0	0	14
8667	13375	23947	6		10.141	1	99	90	107	3	97	98	8.5	1	3		101	94	109	94	95	22.619	20
8668	12482	23947	5	0	10.4175	0	123	114	125	4	123	110	9.5	1	1	166	109	140	115	95	107	39.2857	28	6	-4	2	14	-4	5.03247	4	1	1	2	2	4	5	300	6	1	6	5	23	63	0	0	14	0	0	14
8668	12482	23947	5	0	10.4175	0	123	114	125	4	123	110	9.5	1	2	156	109	140	115	95	107	39.2857	28	-7	-1	-2	-14	2	-20.6068	-10	1	1	2	2	4	5	300	6	1	6	5	23	63	0	0	14	0	0	14
8668	13375	23947	6		10.4175	0	123	114	125	4	123	110	7.5	1	3		109	140	115	95	107	39.2857	28
8669	12482	23947	5	0	10.4586	1	121	131	105	4	102	98	14	1	1	168	86	99	95	84	72	17.8571	18	5	7	7	0	10	3.73377	12	1	1	2	2	4	5	300	6	1	6	5	23	63	0	0	14	0	0	14
8669	12482	23947	5	0	10.4586	1	121	131	105	4	102	98	14	1	2	181	86	99	95	84	72	17.8571	18	5	0	4	7	-1	-7.15792	-14	1	1	2	2	4	5	300	6	1	6	5	23	63	0	0	14	0	0	14
8669	13375	23947	6		10.4586	1	121	131	105	4	102	98	11.5	1	3		86	99	95	84	72	17.8571	18
8670	12482	23947	5	0	10.475	0	86	80	95	3	111	108	15.5	1	1	168	94	106	107	77	98	28.5714	18	2	10	-8	14	-1	-8.11688	12	1	1	2	2	4	5	300	6	1	6	5	23	63	0	0	14	0	0	14
8670	12482	23947	5	0	10.475	0	86	80	95	3	111	108	15.5	1	2	156	94	106	107	77	98	28.5714	18	3	0	1	4	6	-14.269	-8	1	1	2	2	4	5	300	6	1	6	5	23	63	0	0	14	0	0	14
8670	13375	23947	6		10.475	0	86	80	95	3	111	108	17	1	3		94	106	107	77	98	28.5714	18
8671	12482	23947	5	0	10.5517	1	89	88	93	3	100	114	2.5	1	1	168	89	95	95	80	99	22.619	8	1	5	0	0	4	-4.43723	6	1	1	2	2	4	5	300	6	1	6	5	23	63	0	0	14	0	0	14
8671	12482	23947	5	0	10.5517	1	89	88	93	3	100	114	2.5	1	2	183	89	95	95	80	99	22.619	8	-7	-2	-9	-3	0	7.59138	-2	1	1	2	2	4	5	300	6	1	6	5	23	63	0	0	14	0	0	14
8671	13375	23947	6		10.5517	1	89	88	93	3	100	114	10.5	1	3		89	95	95	80	99	22.619	8
8672	12482	23947	5	0	9.77413	0	90	89	93	3	105	100		1	1	168	89	82	99	87	71		6	4	2	5	6	-6		8	1	1	2	2	4	5	300	6	1	6	5	23	63	0	0	14	0	0	14
8672	12482	23947	5	0	9.77413	0	90	89	93	3	105	100		1	2		89	82	99	87	71		6								1	1	2	2	4	5	300	6	1	6	5	23	63	0	0	14	0	0	14
8672	12378	23945			9.77413	0	90	89	93	3	105	100		1	3		89	82	99	87	71		6
8673	12482	23947	5	0	10.2533	0	94	92	98	5	107	102	1.5	1	1	168	90	99	101	78	91	1.19048	12	4	5	4	1	7	10.1732	10	1	1	2	2	4	5	300	6	1	6	5	23	63	0	0	14	0	0	14
8673	12482	23947	5	0	10.2533	0	94	92	98	5	107	102	1.5	1	2	182	90	99	101	78	91	1.19048	12	-5	-2	-7	-4	3	1.0075	-10	1	1	2	2	4	5	300	6	1	6	5	23	63	0	0	14	0	0	14
8673	13375	23947	6		10.2533	0	94	92	98	5	107	102	0	1	3		90	99	101	78	91	1.19048	12
8674	12482	23947	5	0	9.73032	0	83	72	98	3	100	104	10	1	1	168	103	87	102	97	113	23.8095	12	12	3	11	7	6	10.2814	16	1	1	2	2	4	5	300	6	1	6	5	23	63	0	0	14	0	0	14
8674	12482	23947	5	0	9.73032	0	83	72	98	3	100	104	10	1	2	157	103	87	102	97	113	23.8095	12	-13	-3	-14	-10	2	-7.28679	-8	1	1	2	2	4	5	300	6	1	6	5	23	63	0	0	14	0	0	14
8674	13375	23947	6		9.73032	0	83	72	98	3	100	104	9	1	3		103	87	102	97	113	23.8095	12
8675	12482	23947	5	0	10.4422	0	117	120	109	4	105	102	20	1	1	168	85	95	95	77	82	13.0952	10	-2	2	-1	-3	1	-8.54978	6	1	1	2	2	4	5	300	6	1	6	5	23	63	0	0	14	0	0	14
8675	12482	23947	5	0	10.4422	0	117	120	109	4	105	102	20	1	2	181	85	95	95	77	82	13.0952	10	-1	-2	2	0	-9	16.0731	6	1	1	2	2	4	5	300	6	1	6	5	23	63	0	0	14	0	0	14
8675	13375	23947	6		10.4422	0	117	120	109	4	105	102	19.5	1	3		85	95	95	77	82	13.0952	10
8676	12482	23947	5	0	10.1191	0	111	111	108	1	76	81	0	1	1	168	86	69	99	76	77	4.7619	20	-5	5	-2	-8	0	8.87446	0	1	1	2	2	4	5	300	6	1	6	5	23	63	0	0	14	0	0	14
8676	12482	23947	5	0	10.1191	0	111	111	108	1	76	81	0	1	2	156	86	69	99	76	77	4.7619	20	4	-4	-4	16	0	3.88941	-10	1	1	2	2	4	5	300	6	1	6	5	23	63	0	0	14	0	0	14
8676	13375	23947	6		10.1191	0	111	111	108	1	76	81	0	1	3		86	69	99	76	77	4.7619	20
8677	12482	23947	5	0	10.5763	1	81	83	84	4	97	96	0	1	1	168	38	81	57	31	57	0	8	7	-2	5	5	6	4.54545	2	1	1	2	2	4	5	300	6	1	6	5	23	63	0	0	14	0	0	14
8677	12482	23947	5	0	10.5763	1	81	83	84	4	97	96	0	1	2	184	38	81	57	31	57	0	8	6	0	-2	22	-2	-3.51453	0	1	1	2	2	4	5	300	6	1	6	5	23	63	0	0	14	0	0	14
8677	13375	23947	6		10.5763	1	81	83	84	4	97	96	0	1	3		38	81	57	31	57	0	8
8678	12482	23947	5	0	10.4969	0	110	104	113	5	115	118	0	1	1	168	100	105	107	95	93	2.38095	18	5	-8	5	-1	9	11.2554	10	1	1	2	2	4	5	300	6	1	6	5	23	63	0	0	14	0	0	14
8678	12482	23947	5	0	10.4969	0	110	104	113	5	115	118	0	1	2	156	100	105	107	95	93	2.38095	18	-1	17	-4	7	-9	-1.26523	-12	1	1	2	2	4	5	300	6	1	6	5	23	63	0	0	14	0	0	14
8678	13375	23947	6		10.4969	0	110	104	113	5	115	118	0	1	3		100	105	107	95	93	2.38095	18
8679	12482	23947	5	0	10.4066	0	111	112	106	4	100	96	6.5	1	1	168	94	97	107	80	90	15.4762	20	-5	9	-3	-10	6	1.56926	6	1	1	2	2	4	5	300	6	1	6	5	23	63	0	0	14	0	0	14
8679	12482	23947	5	0	10.4066	0	111	112	106	4	100	96	6.5	1	2	156	94	97	107	80	90	15.4762	20	4	-1	-6	25	-14	-5.70525	-14	1	1	2	2	4	5	300	6	1	6	5	23	63	0	0	14	0	0	14
8679	13375	23947	6		10.4066	0	111	112	106	4	100	96	9	1	3		94	97	107	80	90	15.4762	20
8680	12482	23947	5	0	9.95209	0	111	117	102	4	93	98	2.5	1	1	168	97	99	108	89	84	21.4286	22	1	-1	-1	6	-4	-0.974026	4	1	1	2	2	4	5	300	6	1	6	5	23	63	0	0	14	0	0	14
8680	12482	23947	5	0	9.95209	0	111	117	102	4	93	98	2.5	1	2	157	97	99	108	89	84	21.4286	22	-2	5	2	-10	9	2.22587	-4	1	1	2	2	4	5	300	6	1	6	5	23	63	0	0	14	0	0	14
8680	13375	23947	6		9.95209	0	111	117	102	4	93	98	3.5	1	3		97	99	108	89	84	21.4286	22
8681	12482	23947	5	0	10.2861	1	102	115	88	4	110	102	0	1	1	168	98	103	105	89	100	5.95238	26	11	-2	6	13	3	8.82035	6	1	1	2	2	4	5	300	6	1	6	5	23	63	0	0	14	0	0	14
8681	12482	23947	5	0	10.2861	1	102	115	88	4	110	102	0	1	2	156	98	103	105	89	100	5.95238	26	-5	3	-2	-9	3	14.0933	-2	1	1	2	2	4	5	300	6	1	6	5	23	63	0	0	14	0	0	14
8681	13375	23947	6		10.2861	1	102	115	88	4	110	102	2	1	3		98	103	105	89	100	5.95238	26
8682	12483	23948	2	1	6.8282	1	97	91	103	2	119	121	7	1	1	171	115	121	109	115	115	17.0732	28	-10	-5	1	-20	-10	2.92683	-8	1	1	2	1	4	5	300	8	1	5	4	0	75	11	2	0	12	0	12
8682	12483	23948	2	1	6.8282	1	97	91	103	2	119	121	7	1	2	154	115	121	109	115	115	17.0732	28	1	-1	4	-2	-2	0	-2	1	1	2	1	4	5	300	8	1	5	4	0	75	11	2	0	12	0	12
8682	12611	23948	3	-1	6.8282	1	97	91	103	2	119	121	4.5	1	3	189	115	121	109	115	115	17.0732	28	-2	-4	-8	5	0	7.27273	8	1	2	2	1	4	5	300	6	1	5	4	0	74	0	0	26	0	0	0
8683	12483	23948	2	1	6.80903	1	97	87	108	2	101	106	15.5	1	1	171	110	104	101	121	104	9.7561	24	-6	2	9	-21	-20	12.7439	2	1	1	2	1	4	5	300	8	1	5	4	0	75	11	2	0	12	0	12
8683	12483	23948	2	1	6.80903	1	97	87	108	2	101	106	15.5	1	2	154	110	104	101	121	104	9.7561	24	-6	-6	-7	-3	-2	-11.3889	-14	1	1	2	1	4	5	300	8	1	5	4	0	75	11	2	0	12	0	12
8683	12611	23948	3	-1	6.80903	1	97	87	108	2	101	106	2	1	3	189	110	104	101	121	104	9.7561	24	-10	-7	-9	-11	-1	2.52525	4	1	2	2	1	4	5	300	6	1	5	4	0	74	0	0	26	0	0	0
8684	12483	23948	2	1	7.27721	0	95	88	103	4	92	87	4.5	1	1	171	93	112	93	95	97	9.7561	26	17	-4	29	1	-14	7.7439	0	1	1	2	1	4	5	300	8	1	5	4	0	75	11	2	0	12	0	12
8684	12483	23948	2	1	7.27721	0	95	88	103	4	92	87	4.5	1	2	153	93	112	93	95	97	9.7561	26	-11	-3	-18	-1	9	-6.13636	-10	1	1	2	1	4	5	300	8	1	5	4	0	75	11	2	0	12	0	12
8684	12610	23948	3	0	7.27721	0	95	88	103	4	92	87	0.5	1	3	190	93	112	93	95	97	9.7561	26	-4	1	-3	-3	-7	19.7475	10	1	2	1	3	3	5	350	10	1	5	4	0	42	10	0	48	0	0	48
8685	12483	23948	2	1	6.83368	1	112	120	100	3	110	101		1	1	171	115	111	103	130	104	7.31707	36	-8	-2	2	-21	-5	22.6829	-4	1	1	2	1	4	5	300	8	1	5	4	0	75	11	2	0	12	0	12
8685	12483	23948	2	1	6.83368	1	112	120	100	3	110	101		1	2		115	111	103	130	104	7.31707	36								1	1	2	1	4	5	300	8	1	5	4	0	75	11	2	0	12	0	12
8685	12378	23945			6.83368	1	112	120	100	3	110	101		1	3		115	111	103	130	104	7.31707	36
8686	12483	23948	2	1	6.7269	1	110	109	108	2	111	99	37	1	1	171	112	99	105	118	105	12.1951	24	-5	-6	6	-16	-13	2.80488	0	1	1	2	1	4	5	300	8	1	5	4	0	75	11	2	0	12	0	12
8686	12483	23948	2	1	6.7269	1	110	109	108	2	111	99	37	1	2	154	112	99	105	118	105	12.1951	24	-3	-1	-7	1	7	-3.88889	-6	1	1	2	1	4	5	300	8	1	5	4	0	75	11	2	0	12	0	12
8686	12611	23948	3	-1	6.7269	1	110	109	108	2	111	99	23.5	1	3	189	112	99	105	118	105	12.1951	24	-2	1	5	-7	-11	2.52525	-2	1	2	2	1	4	5	300	6	1	5	4	0	74	0	0	26	0	0	0
8687	12483	23948	2	1	6.91581	0	98	93	103	3	102	97	2	1	1	171	100	95	92	113	102	17.0732	18	-2	0	5	-12	-4	10.4268	10	1	1	2	1	4	5	300	8	1	5	4	0	75	11	2	0	12	0	12
8687	12483	23948	2	1	6.91581	0	98	93	103	3	102	97	2	1	2	154	100	95	92	113	102	17.0732	18	-5	1	12	-25	-12	-18.4091	-10	1	1	2	1	4	5	300	8	1	5	4	0	75	11	2	0	12	0	12
8687	12610	23948	3	0	6.91581	0	98	93	103	3	102	97	0	1	3	189	100	95	92	113	102	17.0732	18	7	7	9	3	8	24.2424	-6	1	2	1	3	3	5	350	10	1	5	4	0	42	10	0	48	0	0	48
8688	12483	23948	2	1	7.14305	0	84	85	88	2	119	121	5.5	1	1	168	90	97	82	104	98	2.43902	16	7	9	16	-6	-7	22.561	10	1	1	2	1	4	5	300	8	1	5	4	0	75	11	2	0	12	0	12
8688	12483	23948	2	1	7.14305	0	84	85	88	2	119	121	5.5	1	2	153	90	97	82	104	98	2.43902	16	-7	-6	-12	-2	10	-25	-10	1	1	2	1	4	5	300	8	1	5	4	0	75	11	2	0	12	0	12
8688	12611	23948	3	-1	7.14305	0	84	85	88	2	119	121	13.5	1	3	190	90	97	82	104	98	2.43902	16	2	-2	4	-2	2	6.81818	14	1	2	2	1	4	5	300	6	1	5	4	0	74	0	0	26	0	0	0
8689	12483	23948	2	1	7.31554	0	118	110	121	2	119	114	12	1	1	171	87	109	90	91	77	14.6341	16	1	3	2	-4	9	5.36585	4	1	1	2	1	4	5	300	8	1	5	4	0	75	11	2	0	12	0	12
8689	12483	23948	2	1	7.31554	0	118	110	121	2	119	114	12	1	2	160	87	109	90	91	77	14.6341	16	1	3	7	-7	-2	-4.09091	-4	1	1	2	1	4	5	300	8	1	5	4	0	75	11	2	0	12	0	12
8689	12610	23948	3	0	7.31554	0	118	110	121	2	119	114	9.5	1	3	183	87	109	90	91	77	14.6341	16	-1	-5	-5	7	-6	12.9798	6	1	2	1	3	3	5	350	10	1	5	4	0	42	10	0	48	0	0	48
8690	12483	23948	2	1	7.63313	0	84	74	99	4	105	104	3	1	1	168	142	96	135	137	118	39.0244	40	-24	8	-18	-28	-5	5.97561	-10	1	1	2	1	4	5	300	8	1	5	4	0	75	11	2	0	12	0	12
8690	12483	23948	2	1	7.63313	0	84	74	99	4	105	104	3	1	2	155	142	96	135	137	118	39.0244	40	-10	-5	-3	-16	-4	-4.09091	-4	1	1	2	1	4	5	300	8	1	5	4	0	75	11	2	0	12	0	12
8690	12610	23948	3	0	7.63313	0	84	74	99	4	105	104	3.5	1	3	188	142	96	135	137	118	39.0244	40	7	-5	10	5	-9	23.5354	10	1	2	1	3	3	5	350	10	1	5	4	0	42	10	0	48	0	0	48
8691	12484	23948	5	-1	10.5216	0	110	118	99	4	88	92	2	1	1	189	87	88	102	76	78	9.52381	8	4	0	-1	14	-8	3.57143	4	0	1	2	1	4	5	250	8	1	3	4	0	78	21	0	1	0	0	19
8691	12484	23948	5	-1	10.5216	0	110	118	99	4	88	92	2	1	2	132	87	88	102	76	78	9.52381	8	-8	0	-10	-6	3	-5.2521	-2	0	1	2	1	4	5	250	8	1	3	4	0	78	21	0	1	0	0	19
8691	12602	23946	6	0	10.5216	0	110	118	99	4	88	92	20	1	3	211	87	88	102	76	78	9.52381	8	9	1	15	1	0	5.55892	-4	0	2	2	2	3	5	300	8	1	3	5	0	32	17	0	38	13	0	3
8692	12484	23948	5	-1	10.4038	0	93	100	88	3	100	92	12	1	1	173	95	85	103	88	90	10.7143	18	-2	-2	-5	7	-10	3.57143	12	0	1	2	1	4	5	250	8	1	3	4	0	78	21	0	1	0	0	19
8692	12484	23948	5	-1	10.4038	0	93	100	88	3	100	92	12	1	2	151	95	85	103	88	90	10.7143	18	1	3	2	-7	12	-6.03829	-14	0	1	2	1	4	5	250	8	1	3	4	0	78	21	0	1	0	0	19
8692	12612	23948	6	0	10.4038	0	93	100	88	3	100	92	8	1	3	191	95	85	103	88	90	10.7143	18	2	10	6	1	-8	16.2624	12	1	2	2	1	4	5	250	8
8693	12484	23948	5	-1	9.87543	1	91	84	101	4	77	91	0	1	1	173	82	91	88	86	70	10.7143	2	4	0	8	-5	10	14.2857	14	0	1	2	1	4	5	250	8	1	3	4	0	78	21	0	1	0	0	19
8693	12484	23948	5	-1	9.87543	1	91	84	101	4	77	91	0	1	2	151	82	91	88	86	70	10.7143	2	-6	3	-10	4	-10	-6.4433	-12	0	1	2	1	4	5	250	8	1	3	4	0	78	21	0	1	0	0	19
8693	12612	23948	6	0	9.87543	1	91	84	101	4	77	91	0	1	3	191	82	91	88	86	70	10.7143	2	7	-1	8	-3	17	8.89428	10	1	2	2	1	4	5	250	8
8694	12485	23948	5	1	10.4613	1	113	114	107	4	91	100	14.5	1	1	171	94	97	102	88	85	0	14	-5	3	-7	3	-8	7.95455	10	1	1	2	1	2	5	340		1	6	5	0	56	0	0	44	0	0	23
8694	12485	23948	5	1	10.4613	1	113	114	107	4	91	100	14.5	1	2	153	94	97	102	88	85	0	14	-7	-2	-8	-10	12	5.44752	-16	1	1	2	1	2	5	340		1	6	5	0	56	0	0	44	0	0	23
8694	12612	23948	6	0	10.4613	1	113	114	107	4	91	100	9	1	3	191	94	97	102	88	85	0	14	19	3	15	18	11	7.18617	12	1	2	2	1	4	5	250	8
8695	12485	23948	5	1	9.8371	1	105	97	111	4	100	102	1.5	1	1	171	89	102	99	83	79	4.7619	16	-3	3	-8	6	-4	7.7381	2	1	1	2	1	2	5	340		1	6	5	0	56	0	0	44	0	0	23
8695	12485	23948	5	1	9.8371	1	105	97	111	4	100	102	1.5	1	2	154	89	102	99	83	79	4.7619	16	6	-2	14	-3	1	0.902062	-8	1	1	2	1	2	5	340		1	6	5	0	56	0	0	44	0	0	23
8695	12612	23948	6	0	9.8371	1	105	97	111	4	100	102	2.5	1	3	190	89	102	99	83	79	4.7619	16	7	-1	4	10	3	8.16657	10	1	2	2	1	4	5	250	8
8697	12485	23948	5	1	10.4887	0	77	86	75	3	76	81		1	1	171	94	82	100	88	92	8.33333	14	-5	1	-2	-8	0	0.757576	4	1	1	2	1	2	5	340		1	6	5	0	56	0	0	44	0	0	23
8697	12485	23948	5	1	10.4887	0	77	86	75	3	76	81		1	2		94	82	100	88	92	8.33333	14								1	1	2	1	2	5	340		1	6	5	0	56	0	0	44	0	0	23
8697	12378	23945			10.4887	0	77	86	75	3	76	81		1	3		94	82	100	88	92	8.33333	14
8698	12485	23948	5	1	9.70021	1	106	98	112	3	109	102	6	1	1	171	99	104	105	91	100	17.8571	12	2	5	10	-5	-6	0.324675	8	1	1	2	1	2	5	340		1	6	5	0	56	0	0	44	0	0	23
8698	12485	23948	5	1	9.70021	1	106	98	112	3	109	102	6	1	2	154	99	104	105	91	100	17.8571	12	5	7	0	11	-1	2.43674	0	1	1	2	1	2	5	340		1	6	5	0	56	0	0	44	0	0	23
8698	12612	23948	6	0	9.70021	1	106	98	112	3	109	102	3.5	1	3	190	99	104	105	91	100	17.8571	12	7	-1	-5	11	21	8.79321	14	1	2	2	1	4	5	250	8
8699	12485	23948	5	1	9.90007	1	77	64	96	2	107	100	3.5	1	1	171	100	98	99	93	115	17.8571	6	-2	5	-1	-1	-6	8.27922	18	1	1	2	1	2	5	340		1	6	5	0	56	0	0	44	0	0	23
8699	12485	23948	5	1	9.90007	1	77	64	96	2	107	100	3.5	1	2	154	100	98	99	93	115	17.8571	6	3	0	7	-3	6	-1.3941	-12	1	1	2	1	2	5	340		1	6	5	0	56	0	0	44	0	0	23
8699	12612	23948	6	0	9.90007	1	77	64	96	2	107	100	1	1	3	190	100	98	99	93	115	17.8571	6	5	-3	-5	9	9	4.6695	12	1	2	2	1	4	5	250	8
8700	12485	23948	5	1	9.94935	0	81	76	91	2	107	114	8.5	1	1	171	87	88	98	77	84	2.38095	4	-2	9	-5	4	-3	8.98268	12	1	1	2	1	2	5	340		1	6	5	0	56	0	0	44	0	0	23
8700	12485	23948	5	1	9.94935	0	81	76	91	2	107	114	8.5	1	2	154	87	88	98	77	84	2.38095	4	1	2	-2	0	11	2.03843	-6	1	1	2	1	2	5	340		1	6	5	0	56	0	0	44	0	0	23
8700	12612	23948	6	0	9.94935	0	81	76	91	2	107	114	12	1	3	190	87	88	98	77	84	2.38095	4	-4	-2	-2	-3	-8	1.30382	-4	1	2	2	1	4	5	250	8
8701	12485	23948	5	1	9.94935	0	128	121	127	3	115	110		1	1	171	121	114	114	119	115	13.0952	20	-5	3	8	-21	-3	15.3139	14	1	1	2	1	2	5	340		1	6	5	0	56	0	0	44	0	0	23
8701	12485	23948	5	1	9.94935	0	128	121	127	3	115	110		1	2		121	114	114	119	115	13.0952	20								1	1	2	1	2	5	340		1	6	5	0	56	0	0	44	0	0	23
8701	12378	23945			9.94935	0	128	121	127	3	115	110		1	3		121	114	114	119	115	13.0952	20
8702	12485	23948	5	1	10.4887	0	104	104	102	2	105	105	3	1	1	171	95	110	95	102	83	13.0952	22	-5	-12	3	-15	-3	19.8593	2	1	1	2	1	2	5	340		1	6	5	0	56	0	0	44	0	0	23
8702	12485	23948	5	1	10.4887	0	104	104	102	2	105	105	3	1	2	153	95	110	95	102	83	13.0952	22	-2	12	-2	-3	5	-13.3669	-6	1	1	2	1	2	5	340		1	6	5	0	56	0	0	44	0	0	23
8702	12612	23948	6	0	10.4887	0	104	104	102	2	105	105	11.5	1	3	191	95	110	95	102	83	13.0952	22	4	-5	2	1	14	4.92218	4	1	2	2	1	4	5	250	8
8703	12485	23948	5	1	10.6448	0	87	94	83	3	109	96	3	1	1	173	93	89	92	93	101	8.33333	16	-2	15	7	-14	-2	14.3939	8	1	1	2	1	2	5	340		1	6	5	0	56	0	0	44	0	0	23
8703	12485	23948	5	1	10.6448	0	87	94	83	3	109	96	3	1	2	153	93	89	92	93	101	8.33333	16	3	-6	0	4	5	-14.4799	-10	1	1	2	1	2	5	340		1	6	5	0	56	0	0	44	0	0	23
8703	12612	23948	6	0	10.6448	0	87	94	83	3	109	96	0.5	1	3	189	93	89	92	93	101	8.33333	16	4	2	4	8	-5	6.45846	8	1	2	2	1	4	5	250	8
8704	12485	23948	5	1	9.90828	1	96	97	96	6	109	98	23.5	1	1	173	78	92	88	74	76	7.14286	6	9	-1	12	4	-1	-3.73377	18	1	1	2	1	2	5	340		1	6	5	0	56	0	0	44	0	0	23
8704	12485	23948	5	1	9.90828	1	96	97	96	6	109	98	23.5	1	2	152	78	92	88	74	76	7.14286	6	3	8	-6	11	14	11.0239	-8	1	1	2	1	2	5	340		1	6	5	0	56	0	0	44	0	0	23
8704	12612	23948	6	0	9.90828	1	96	97	96	6	109	98	17.5	1	3	190	78	92	88	74	76	7.14286	6	0	-4	4	-4	-6	12.0376	4	1	2	2	1	4	5	250	8
8705	12485	23948	5	1	9.86721	0	96	94	98	6	107	108	4.5	1	1	173	97	97	101	93	93	11.9048	6	3	2	6	6	-9	14.2316	14	1	1	2	1	2	5	340		1	6	5	0	56	0	0	44	0	0	23
8705	12485	23948	5	1	9.86721	0	96	94	98	6	107	108	4.5	1	2	151	97	97	101	93	93	11.9048	6	-2	-2	-7	0	10	-16.858	-10	1	1	2	1	2	5	340		1	6	5	0	56	0	0	44	0	0	23
8705	12612	23948	6	0	9.86721	0	96	94	98	6	107	108	8.5	1	3	191	97	97	101	93	93	11.9048	6	-1	2	-2	-7	10	12.2903	-2	1	2	2	1	4	5	250	8
8706	12485	23948	5	1	10.5352	0	91	99	86	5	118	100	7	1	1	173	116	88	108	113	122	41.6667	20	-7	8	-2	-13	-2	8.33333	10	1	1	2	1	2	5	340		1	6	5	0	56	0	0	44	0	0	23
8706	12485	23948	5	1	10.5352	0	91	99	86	5	118	100	7	1	2	153	116	88	108	113	122	41.6667	20	-2	-3	-2	1	-3	-39.6907	-14	1	1	2	1	2	5	340		1	6	5	0	56	0	0	44	0	0	23
8706	12612	23948	6	0	10.5352	0	91	99	86	5	118	100	9	1	3	189	116	88	108	113	122	41.6667	20	1	6	5	-9	6	24.9848	6	1	2	2	1	4	5	250	8
8708	12485	23948	5	1	9.85352	1	94	87	102	2	115	102		1	1	173	88	100	96	78	95	13.0952	4	2	8	0	3	2	2.81385	22	1	1	2	1	2	5	340		1	6	5	0	56	0	0	44	0	0	23
8708	12485	23948	5	1	9.85352	1	94	87	102	2	115	102		1	2	151	88	100	96	78	95	13.0952	4	1	1	-2	-2	17	-1.4761	-16	1	1	2	1	2	5	340		1	6	5	0	56	0	0	44	0	0	23
8708	12612	23948	6	0	9.85352	1	94	87	102	2	115	102		1	3	191	88	100	96	78	95	13.0952	4	-2	0	0	-7	3	12.0376	12	1	2	2	1	4	5	250	8
8709	12485	23948	5	1	9.91102	0	90	108	75	4	111	108	2	1	1	173	97	103	104	89	95	19.0476	14	-2	0	-4	-1	0	4.81602	14	1	1	2	1	2	5	340		1	6	5	0	56	0	0	44	0	0	23
8709	12485	23948	5	1	9.91102	0	90	108	75	4	111	108	2	1	2	152	97	103	104	89	95	19.0476	14	3	-4	2	4	4	-21.8018	-14	1	1	2	1	2	5	340		1	6	5	0	56	0	0	44	0	0	23
8709	12612	23948	6	0	9.91102	0	90	108	75	4	111	108	5	1	3	190	97	103	104	89	95	19.0476	14	0	13	-2	3	0	16.5656	18	1	2	2	1	4	5	250	8
8724	12488	23949	2	1	7.18686	0	90	82	100	2	103	103		1	1		96	96	97	97	94	4.87805	10								1	1	2	1	3	5	250	7	1	5	4	5	49	0	7	39	0	0	35
8724	12488	23949	2	1	7.18686	0	90	82	100	2	103	103		1	2		96	96	97	97	94	4.87805	10								1	1	2	1	3	5	250	7	1	5	4	5	49	0	7	39	0	0	35
8724	12378	23945			7.18686	0	90	82	100	2	103	103		1	3		96	96	97	97	94	4.87805	10
8725	12488	23949	2	1	7.58385	0	117	114	114	3	103	100	7.5	1	1	181	120	105	122	108	110	29.2683	30	-4	3	2	-7	-9	15.7317	-2	1	1	2	1	3	5	250	7	1	5	4	5	49	0	7	39	0	0	35
8725	12488	23949	2	1	7.58385	0	117	114	114	3	103	100	7.5	1	2	136	120	105	122	108	110	29.2683	30	-3	-1	-1	-3	-6	-22.2727	-8	1	1	2	1	3	5	250	7	1	5	4	5	49	0	7	39	0	0	35
8725	12488	23949	3	0	7.58385	0	117	114	114	3	103	100	7	1	3	203	120	105	122	108	110	29.2683	30	-12	-4	-19	1	1	21.7172	10	1	2	2	1	3	5	250	7	1	5	5	0	64	6	0	30	0	0	0
8726	12488	23949	2	1	7.38946	0	83	76	95	2	111	111	0	1	1	181	103	108	101	65	103	21.9512	16	-1	-1	3	34	-4	25.5488	10	1	1	2	1	3	5	250	7	1	5	4	5	49	0	7	39	0	0	35
8726	12488	23949	2	1	7.38946	0	83	76	95	2	111	111	0	1	2	133	103	108	101	65	103	21.9512	16	1	-5	-1	3	2	-34.1667	-14	1	1	2	1	3	5	250	7	1	5	4	5	49	0	7	39	0	0	35
8726	12613	23949	3	0	7.38946	0	83	76	95	2	111	111	0	1	3	206	103	108	101	65	103	21.9512	16	-4	-3	-7	4	-3	32.1212	0	0	2	1	1	4	5	225	8	1	6	5	0	59	0	8	33	0	0	0
8727	12488	23949	2	1	6.95414	1	99	99	98	1	92	100	1	1	1	181	100	115	101	102	85	17.0732	14	9	-2	17	-5	6	20.4268	10	1	1	2	1	3	5	250	7	1	5	4	5	49	0	7	39	0	0	35
8727	12488	23949	2	1	6.95414	1	99	99	98	1	92	100	1	1	2	134	100	115	101	102	85	17.0732	14	2	-6	1	8	-15	-26.3889	-2	1	1	2	1	3	5	250	7	1	5	4	5	49	0	7	39	0	0	35
8727	12613	23949	3	0	6.95414	1	99	99	98	1	92	100	6	1	3	205	100	115	101	102	85	17.0732	14	-3	7	-11	8	11	16.1616	-2	0	2	1	1	4	5	225	8	1	6	5	0	59	0	8	33	0	0	0
8728	12488	23949	2	1	7.33744	0	108	110	103	2	96	101	11	1	1	174	109	96	108	103	110	17.0732	24	-2	6	8	-12	-8	5.42683	-2	1	1	2	1	3	5	250	7	1	5	4	5	49	0	7	39	0	0	35
8728	12488	23949	2	1	7.33744	0	108	110	103	2	96	101	11	1	2	133	109	96	108	103	110	17.0732	24	-9	-5	-6	-1	-23	-18.0556	-4	1	1	2	1	3	5	250	7	1	5	4	5	49	0	7	39	0	0	35
8728	12613	23949	3	0	7.33744	0	108	110	103	2	96	101	26	1	3	206	109	96	108	103	110	17.0732	24	6	-1	4	4	10	13.7374	4	0	2	1	1	4	5	225	8	1	6	5	0	59	0	8	33	0	0	0
8730	12488	23949	2	1	7.01164	1	118	112	118	3	114	108	7.5	1	1	181	101	105	94	117	86	9.7561	14	0	2	9	-16	1	20.2439	10	1	1	2	1	3	5	250	7	1	5	4	5	49	0	7	39	0	0	35
8730	12488	23949	2	1	7.01164	1	118	112	118	3	114	108	7.5	1	2	135	101	105	94	117	86	9.7561	14	-2	-2	3	-8	-3	-20.9091	0	1	1	2	1	3	5	250	7	1	5	4	5	49	0	7	39	0	0	35
8730	12488	23949	3	0	7.01164	1	118	112	118	3	114	108	2.5	1	3	204	101	105	94	117	86	9.7561	14	-3	-3	-6	3	-1	15.3535	6	1	2	2	1	3	5	250	7	1	5	5	0	64	6	0	30	0	0	0
8731	12488	23949	2	1	7.10472	1	91	76	108	2	103	106		1	1	181	88	103	84	98	86	7.31707	12	-19	-8	2	-41	-21	2.68293	2	1	1	2	1	3	5	250	7	1	5	4	5	49	0	7	39	0	0	35
8731	12488	23949	2	1	7.10472	1	91	76	108	2	103	106		1	2	133	88	103	84	98	86	7.31707	12	7	-3	-9	32	-4	1.11111	0	1	1	2	1	3	5	250	7	1	5	4	5	49	0	7	39	0	0	35
8731	12613	23949	3	0	7.10472	1	91	76	108	2	103	106		1	3	206	88	103	84	98	86	7.31707	12	5	7	15	-13	5	-8.83838	2	0	2	1	1	4	5	225	8	1	6	5	0	59	0	8	33	0	0	0
8732	12595	23949	2	0	7.34292	1	122	117	121	4	102	113		1	1	181	124	117	131	103	108	27.5	26	4	2	-1	12	-1	11.5244	6	1	1						5	1	5	3	0	29	9	0	26	36	0	36
8732	12595	23949	2	0	7.34292	1	122	117	121	4	102	113		1	2		124	117	131	103	108	27.5	26								1	1						5	1	5	3	0	29	9	0	26	36	0	36
8732	12378	23945			7.34292	1	122	117	121	4	102	113		1	3		124	117	131	103	108	27.5	26
8733	12595	23949	2	0	7.62765	1	123	121	118	4	114	103	1.5	1	1	181	105	113	119	83	103	32.5	30	-2	4	-5	8	-15	-12.9878	-2	1	1						5	1	5	3	0	29	9	0	26	36	0	36
8733	12595	23949	2	0	7.62765	1	123	121	118	4	114	103	1.5	1	2	136	105	113	119	83	103	32.5	30	0	-2	0	2	-5	-17.2395	-6	1	1						5	1	5	3	0	29	9	0	26	36	0	36
8733	12488	23949	3	0	7.62765	1	123	121	118	4	114	103	1	1	3	203	105	113	119	83	103	32.5	30	3	1	-3	9	4	27.2727	14	1	2	2	1	3	5	250	7	1	5	5	0	64	6	0	30	0	0	0
8734	12595	23949	2	0	6.95962	0	112	102	118	2	95	89	7	1	1	181	102	98	101	102	100	10	22	1	1	9	-10	2	-0.243902	-10	1	1						5	1	5	3	0	29	9	0	26	36	0	36
8734	12595	23949	2	0	6.95962	0	112	102	118	2	95	89	7	1	2	135	102	98	101	102	100	10	22	-8	0	-16	7	-11	-7.48337	4	1	1						5	1	5	3	0	29	9	0	26	36	0	36
8734	12488	23949	3	0	6.95962	0	112	102	118	2	95	89	3.5	1	3	204	102	98	101	102	100	10	22	0	5	10	-7	-19	9.09091	8	1	2	2	1	3	5	250	7	1	5	5	0	64	6	0	30	0	0	0
8735	12595	23949	2	0	6.76249	0	103	91	113	2	90	95	9	1	1	181	90	93	98	90	76	15	12	-1	1	-8	1	20	4.5122	6	1	1						5	1	5	3	0	29	9	0	26	36	0	36
8735	12595	23949	2	0	6.76249	0	103	91	113	2	90	95	9	1	2	134	90	93	98	90	76	15	12	-5	-3	2	-12	-14	-10.6233	-6	1	1						5	1	5	3	0	29	9	0	26	36	0	36
8735	12613	23949	3	0	6.76249	0	103	91	113	2	90	95	2	1	3	205	90	93	98	90	76	15	12	3	1	-2	6	8	0.20202	2	0	2	1	1	4	5	225	8	1	6	5	0	59	0	8	33	0	0	0
8736	12595	23949	2	0	7.50719	1	95	91	100	3	116		10.5	1	1	181	89	107	93	86	98	7.5	24	-5	-1	-3	-7	-6	4.69512	-4	1	1						5	1	5	3	0	29	9	0	26	36	0	36
8736	12595	23949	2	0	7.50719	1	95	91	100	3	116		10.5	1	2	133	89	107	93	86	98	7.5	24	11	-7	10	13	-7	1.13821	-8	1	1						5	1	5	3	0	29	9	0	26	36	0	36
8736	12613	23949	3	0	7.50719	1	95	91	100	3	116		1	1	3	206	89	107	93	86	98	7.5	24	2	-1	0	4	3	23.0303	20	0	2	1	1	4	5	225	8	1	6	5	0	59	0	8	33	0	0	0
8737	12595	23949	2	0	7.14031	1	116	110	117	2	114	121	3	1	1	181	110	115	107	113	100	20	28	5	-1	12	-5	-6	-2.92683	4	1	1						5	1	5	3	0	29	9	0	26	36	0	36
8737	12595	23949	2	0	7.14031	1	116	110	117	2	114	121	3	1	2	133	110	115	107	113	100	20	28	-6	-3	-6	-6	4	-3.73984	-6	1	1						5	1	5	3	0	29	9	0	26	36	0	36
8737	12613	23949	3	0	7.14031	1	116	110	117	2	114	121	8.5	1	3	206	110	115	107	113	100	20	28	-1	1	1	-1	-7	29.8485	2	0	2	1	1	4	5	225	8	1	6	5	0	59	0	8	33	0	0	0
8738	12595	23949	2	0	7.57563	0	106	110	99	2	79	85	7.5	1	1	181	111	108	119	98	98	17.5	36	-11	-6	-7	-10	-8	2.0122	-8	1	1						5	1	5	3	0	29	9	0	26	36	0	36
8738	12595	23949	2	0	7.57563	0	106	110	99	2	79	85	7.5	1	2	136	111	108	119	98	98	17.5	36	9	-4	3	15	-4		6	1	1						5	1	5	3	0	29	9	0	26	36	0	36
8738	12488	23949	3	0	7.57563	0	106	110	99	2	79	85	9	1	3	203	111	108	119	98	98	17.5	36	-7	-1	-6	-4	-7		2	1	2	2	1	3	5	250	7	1	5	5	0	64	6	0	30	0	0	0
8739	12595	23949	2	0	6.78987	0	114	105	118	2	106	108	2.5	1	1	181	123	118	118	121	116	22.5	14	-3	-2	2	-5	-17	1.89024	2	1	1						5	1	5	3	0	29	9	0	26	36	0	36
8739	12595	23949	2	0	6.78987	0	114	105	118	2	106	108	2.5	1	2	134	123	118	118	121	116	22.5	14	5	-4	5	2	4	-4.39024	-6	1	1						5	1	5	3	0	29	9	0	26	36	0	36
8739	12613	23949	3	0	6.78987	0	114	105	118	2	106	108	12.5	1	3	205	123	118	118	121	116	22.5	14	-5	-2	-6	-2	3	18.6364	26	0	2	1	1	4	5	225	8	1	6	5	0	59	0	8	33	0	0	0
8740	12595	23949	2	0	6.7488	0	104	96	111	2	101	100	5.5	1	1	181	98	104	92	105	110	15	16	-2	0	7	-10	-18	-12.561	2	1	1						5	1	5	3	0	29	9	0	26	36	0	36
8740	12595	23949	2	0	6.7488	0	104	96	111	2	101	100	5.5	1	2	135	98	104	92	105	110	15	16	-8	0	-7	-6	-11	4.37916	-8	1	1						5	1	5	3	0	29	9	0	26	36	0	36
8740	12488	23949	3	0	6.7488	0	104	96	111	2	101	100	5.5	1	3	204	98	104	92	105	110	15	16	21	1	25	6	20	17.6263	20	1	2	2	1	3	5	250	7	1	5	5	0	64	6	0	30	0	0	0
8741	12595	23949	2	0	7.32375	0	104	91	115	2	114	106	0	1	1	181	85	101	84	94	83	15	16	1	-2	8	-7	-9	-5.2439	0	1	1						5	1	5	3	0	29	9	0	26	36	0	36
8741	12595	23949	2	0	7.32375	0	104	91	115	2	114	106	0	1	2	134	85	101	84	94	83	15	16	-1	4	1	-7	7	-7.48337	-6	1	1						5	1	5	3	0	29	9	0	26	36	0	36
8741	12488	23949	3	0	7.32375	0	104	91	115	2	114	106	0	1	3	205	85	101	84	94	83	15	16	6	-6	14	-2	-10	8.83838	0	1	2	2	1	3	5	250	7	1	5	5	0	64	6	0	30	0	0	0
8742	12595	23949	2	0	7.29911	0	122	112	126	4	107	89	10	1	1	181	88	100	90	95	70	10	18	15	1	15	10	13	-5.12195	-8	1	1						5	1	5	3	0	29	9	0	26	36	0	36
8742	12595	23949	2	0	7.29911	0	122	112	126	4	107	89	10	1	2	134	88	100	90	95	70	10	18	-17	-1	-15	-20	2	8.75831	10	1	1						5	1	5	3	0	29	9	0	26	36	0	36
8742	12488	23949	3	0	7.29911	0	122	112	126	4	107	89	12	1	3	205	88	100	90	95	70	10	18	14	2	20	6	7	18.1818	10	1	2	2	1	3	5	250	7	1	5	5	0	64	6	0	30	0	0	0
8743	12595	23949	2	0	7.66051	1	113	111	111	2	111	92	6.5	1	1	181	88	95	88	93	87	17.5	18	1	3	3	-2	-2	-7.7439	6	1	1						5	1	5	3	0	29	9	0	26	36	0	36
8743	12595	23949	2	0	7.66051	1	113	111	111	2	111	92	6.5	1	2	135	88	95	88	93	87	17.5	18	7	-8	14	-2	-5	14.6883	-6	1	1						5	1	5	3	0	29	9	0	26	36	0	36
8743	12613	23949	3	0	7.66051	1	113	111	111	2	111	92	16.5	1	3	204	88	95	88	93	87	17.5	18	2	2	3	-3	17	2.82828	-2	0	2	1	1	4	5	225	8	1	6	5	0	59	0	8	33	0	0	0
8744	12489	23949	2	0	6.8063	0	112	126	94	4	116	106	6	1	1	176	132	124	121	126	150	80	26	5	-4	12	-10	-5	-43.4146	-4	1	1	2	2	4	5	300	8	1	5	4	3	73	0	0	24	0	0	24
8744	12489	23949	2	0	6.8063	0	112	126	94	4	116	106	6	1	2	140	132	124	121	126	150	80	26	-8	-1	-8	-3	-8	-3.25203	0	1	1	2	2	4	5	300	8	1	5	4	3	73	0	0	24	0	0	24
8744	12613	23949	3	0	6.8063	0	112	126	94	4	116	106	8.5	1	3	205	132	124	121	126	150	80	26	-2	-2	-9	8	0	34.8485	-2	0	2	1	1	4	5	225	8	1	6	5	0	59	0	8	33	0	0	0
8745	12489	23949	2	0	7.19507	0	102	88	114	3	121	109	6	1	1	176	106	96	101	113	104	15	22	-2	4	7	-15	-4	4.5122	-4	1	1	2	2	4	5	300	8	1	5	4	3	73	0	0	24	0	0	24
8745	12489	23949	2	0	7.19507	0	102	88	114	3	121	109	6	1	2	139	106	96	101	113	104	15	22	-5	1	-10	3	-4	-1.73442	-2	1	1	2	2	4	5	300	8	1	5	4	3	73	0	0	24	0	0	24
8745	12613	23949	3	0	7.19507	0	102	88	114	3	121	109	4	1	3	206	106	96	101	113	104	15	22	-5	-1	-6	-5	8	9.49495	6	0	2	1	1	4	5	225	8	1	6	5	0	59	0	8	33	0	0	0
8746	12489	23949	2	0	7.23888	0	103	105	100	3	103	109	5	1	1	176	96	99	93	105	84	15	34	1	-2	7	-3	-6	-5.2439	-14	1	1	2	2	4	5	300	8	1	5	4	3	73	0	0	24	0	0	24
8746	12489	23949	2	0	7.23888	0	103	105	100	3	103	109	5	1	2	140	96	99	93	105	84	15	34	-7	2	-3	-16	3	-9.7561	-8	1	1	2	2	4	5	300	8	1	5	4	3	73	0	0	24	0	0	24
8746	12488	23949	3	0	7.23888	0	103	105	100	3	103	109	7	1	3	218	96	99	93	105	84	15	34	7	-8	7	10	-4	35.5556	16	1	2	2	1	3	5	250	7	1	5	5	0	64	6	0	30	0	0	0
8747	12489	23949	2	0	7.3128	1	100	85	114	2	100	101	2	1	1	176	95	115	99	95	77	12.5	18	7	-5	6	10	4	-2.7439	-2	1	1	2	2	4	5	300	8	1	5	4	3	73	0	0	24	0	0	24
8747	12489	23949	2	0	7.3128	1	100	85	114	2	100	101	2	1	2	140	95	115	99	95	77	12.5	18	-15	-1	-6	-30	-3	-7.48337	-2	1	1	2	2	4	5	300	8	1	5	4	3	73	0	0	24	0	0	24
8747	12488	23949	3	0	7.3128	1	100	85	114	2	100	101	3	1	3	205	95	115	99	95	77	12.5	18	8	0	8	12	3	17.7273	8	1	2	2	1	3	5	250	7	1	5	5	0	64	6	0	30	0	0	0
8748	12489	23949	2	0	6.7488	1	116	107	120	3	119	113	7	1	1	176	109	102	107	110	95	25	22	4	2	8	-3	4	-3.04878	2	1	1	2	2	4	5	300	8	1	5	4	3	73	0	0	24	0	0	24
8748	12489	23949	2	0	6.7488	1	116	107	120	3	119	113	7	1	2	141	109	102	107	110	95	25	22	-18	-3	-17	-13	-10	-19.6785	-10	1	1	2	2	4	5	300	8	1	5	4	3	73	0	0	24	0	0	24
8748	12488	23949	3	0	6.7488	1	116	107	120	3	119	113	9.5	1	3	204	109	102	107	110	95	25	22	10	3	10	10	3	54.5455	18	1	2	2	1	3	5	250	7	1	5	5	0	64	6	0	30	0	0	0
8749	12489	23949	2	0	7.62491	1	118	121	110	3	125	129	2	1	1	176	118	113	119	113	99	22.5	36	0	0	2	-3	0	6.76829	-4	1	1	2	2	4	5	300	8	1	5	4	3	73	0	0	24	0	0	24
8749	12489	23949	2	0	7.62491	1	118	121	110	3	125	129	2	1	2	142	118	113	119	113	99	22.5	36	-3	0	-7	0	4	-1.99557	-2	1	1	2	2	4	5	300	8	1	5	4	3	73	0	0	24	0	0	24
8749	12488	23949	3	0	7.62491	1	118	121	110	3	125	129	3	1	3	203	118	113	119	113	99	22.5	36	-3	-3	4	-3	-16	22.7273	0	1	2	2	1	3	5	250	7	1	5	5	0	64	6	0	30	0	0	0
8750	12489	23949	2	0	7.60575	1	86	79	97	2	92	92	2.5	1	1	176	89	103	86	98	89	17.5	14	-5	-5	3	-15	-7	-7.7439	10	1	1	2	2	4	5	300	8	1	5	4	3	73	0	0	24	0	0	24
8750	12489	23949	2	0	7.60575	1	86	79	97	2	92	92	2.5	1	2	140	89	103	86	98	89	17.5	14	-1	2	-4	7	-7	8.02168	-10	1	1	2	2	4	5	300	8	1	5	4	3	73	0	0	24	0	0	24
8750	12613	23949	3	0	7.60575	1	86	79	97	2	92	92	7	1	3	205	89	103	86	98	89	17.5	14	18	-5	23	5	14	9.49495	18	0	2	1	1	4	5	225	8	1	6	5	0	59	0	8	33	0	0	0
8751	12489	23949	2	0	7.47433	0	84	76	97	2	90	88	10	1	1	176	79	103	80	88	71	22.5	10	-16	0	-6	-29	-2	-17.622	2	1	1	2	2	4	5	300	8	1	5	4	3	73	0	0	24	0	0	24
8751	12489	23949	2	0	7.47433	0	84	76	97	2	90	88	10	1	2	140	79	103	80	88	71	22.5	10	4	-6	-2	14	-4	-4.87805	-2	1	1	2	2	4	5	300	8	1	5	4	3	73	0	0	24	0	0	24
8751	12488	23949	3	0	7.47433	0	84	76	97	2	90	88	10	1	3	205	79	103	80	88	71	22.5	10	1	1	3	-2	1	8.88889	8	1	2	2	1	3	5	250	7	1	5	5	0	64	6	0	30	0	0	0
8752	12489	23949	2	0	6.68309	0	78	72	90	2	90	84	0	1	1	176	73	76	85	71	89	12.5	12	5	12	8	-1	-9	2.13415	2	1	1	2	2	4	5	300	8	1	5	4	3	73	0	0	24	0	0	24
8752	12489	23949	2	0	6.68309	0	78	72	90	2	90	84	0	1	2	141	73	76	85	71	89	12.5	12	13	-5	2	24	-6		0	1	1	2	2	4	5	300	8	1	5	4	3	73	0	0	24	0	0	24
8752	12488	23949	3	0	6.68309	0	78	72	90	2	90	84	2.5	1	3	204	73	76	85	71	89	12.5	12	-7	-2	-9	-2	-5		-2	1	2	2	1	3	5	250	7	1	5	5	0	64	6	0	30	0	0	0
8754	12489	23949	2	0	6.78166	0	97	84	111	3	108	101	10.5	1	1	176	102	103	98	105	109	27.5	14	5	8	13	-8	-1	-3.10976	8	1	1	2	2	4	5	300	8	1	5	4	3	73	0	0	24	0	0	24
8754	12489	23949	2	0	6.78166	0	97	84	111	3	108	101	10.5	1	2	141	102	103	98	105	109	27.5	14	-7	-3	-4	-4	-15	-17.5721	-6	1	1	2	2	4	5	300	8	1	5	4	3	73	0	0	24	0	0	24
8754	12488	23949	3	0	6.78166	0	97	84	111	3	108	101	6	1	3	204	102	103	98	105	109	27.5	14	3	5	1	6	0	4.54545	6	1	2	2	1	3	5	250	7	1	5	5	0	64	6	0	30	0	0	0
8755	12489	23949	2	0	7.03354	0	136	136	128	6	121	124	0	1	1	176	115	132	110	111	119	20	26	9	-4	14	1	-6	6.82927	0	1	1	2	2	4	5	300	8	1	5	4	3	73	0	0	24	0	0	24
8755	12489	23949	2	0	7.03354	0	136	136	128	6	121	124	0	1	2	139	115	132	110	111	119	20	26	-6	-8	0	-8	-10	-11.2737	0	1	1	2	2	4	5	300	8	1	5	4	3	73	0	0	24	0	0	24
8755	12613	23949	3	0	7.03354	0	136	136	128	6	121	124	0	1	3	206	115	132	110	111	119	20	26	0	4	-6	8	4	48.0808	12	0	2	1	1	4	5	225	8	1	6	5	0	59	0	8	33	0	0	0
8756	12489	23949	2	0	7.34018	0	93	85	103	2	93	95	9.5	1	1	176	93	103	92	98	90	25	26	6	6	13	-2	-5	-12.8049	-6	1	1	2	2	4	5	300	8	1	5	4	3	73	0	0	24	0	0	24
8756	12489	23949	2	0	7.34018	0	93	85	103	2	93	95	9.5	1	2	140	93	103	92	98	90	25	26	1	-6	1	-2	8	3.71397	-10	1	1	2	2	4	5	300	8	1	5	4	3	73	0	0	24	0	0	24
8756	12488	23949	3	0	7.34018	0	93	85	103	2	93	95	4.5	1	3	205	93	103	92	98	90	25	26	-16	-6	-18	-3	-30	-0.353535	14	1	2	2	1	3	5	250	7	1	5	5	0	64	6	0	30	0	0	0
8757	12489	23949	2	0	6.93498	0	80	78	87				2.5	1	1	176	86	83	84	97	75	15	16	-12	-9	0	-26	2	-5.2439	-2	1	1	2	2	4	5	300	8	1	5	4	3	73	0	0	24	0	0	24
8757	12489	23949	2	0	6.93498	0	80	78	87				2.5	1	2	140	86	83	84	97	75	15	16	-1	-8	-8	11	-11		-6	1	1	2	2	4	5	300	8	1	5	4	3	73	0	0	24	0	0	24
8757	12613	23949	3	0	6.93498	0	80	78	87				6	1	3	205	86	83	84	97	75	15	16	-2	3	-1	-4	3		0	0	2	1	1	4	5	225	8	1	6	5	0	59	0	8	33	0	0	0
8759	12490	23949	5	-1	10.2423	1	97	92	103	3	97	98	18	1	1	181	81	98	91	75	81	17.8571	8	1	-1	-8	11	9	0	16	0	1	2	1	3	5	300		1	4	4	0	56	0	0	44	0	0	44
8759	12490	23949	5	-1	10.2423	1	97	92	103	3	97	98	18	1	2	135	81	98	91	75	81	17.8571	8	11	-2	14	4	6	5.67227	-14	0	1	2	1	3	5	300		1	4	4	0	56	0	0	44	0	0	44
8759	12615	23949	6	0	10.2423	1	97	92	103	3	97	98	21	1	3	203	81	98	91	75	81	17.8571	8	3	-1	-2	13	-5	-1.87993	12	0	2	2	1	3	5	300	7
8760	12490	23949	5	-1	9.99589	1	102	100	102	3	85	87	6	1	1	176	103	109	109	95	97	27.381	24	1	6	-2	7	2	5.57359	6	0	1	2	1	3	5	300		1	4	4	0	56	0	0	44	0	0	44
8760	12490	23949	5	-1	9.99589	1	102	100	102	3	85	87	6	1	2	141	103	109	109	95	97	27.381	24	-3	-8	-1	-7	-1	-25.1114	-14	0	1	2	1	3	5	300		1	4	4	0	56	0	0	44	0	0	44
8760	12615	23949	6	0	9.99589	1	102	100	102	3	85	87	5.5	1	3	202	103	109	109	95	97	27.381	24	6	4	0	6	14	18.961	8	0	2	2	1	3	5	300	7
8761	12490	23949	5	-1	9.78782	1	95	102	89	4	76	92	2.5	1	1	176	100	89	111	94	83	21.4286	12	-5	-3	-15	2	8	11.526	4	0	1	2	1	3	5	300		1	4	4	0	56	0	0	44	0	0	44
8761	12490	23949	5	-1	9.78782	1	95	102	89	4	76	92	2.5	1	2	141	100	89	111	94	83	21.4286	12	3	5	7	-3	7	-32.9545	-4	0	1	2	1	3	5	300		1	4	4	0	56	0	0	44	0	0	44
8761	12615	23949	6	0	9.78782	1	95	102	89	4	76	92	7	1	3	202	100	89	111	94	83	21.4286	12	5	-4	2	6	4	31.9588	8	0	2	2	1	3	5	300	7
8762	12490	23949	5	-1	10.1656	0	90	85	98	5	105	94	9.5	1	1	176	90	85	97	86	85	2.38095	10	2	0	-2	7	3	16.9372	8	0	1	2	1	3	5	300		1	4	4	0	56	0	0	44	0	0	44
8762	12490	23949	5	-1	10.1656	0	90	85	98	5	105	94	9.5	1	2	140	90	85	97	86	85	2.38095	10	-3	-1	2	-10	0	-2.65152	-8	0	1	2	1	3	5	300		1	4	4	0	56	0	0	44	0	0	44
8762	12615	23949	6	0	10.1656	0	90	85	98	5	105	94	18	1	3	218	90	85	97	86	85	2.38095	10	4	4	2	4	7	-6.35739	0	0	2	2	1	3	5	300	7
8763	12490	23949	5	-1	10.5654	0	106	104	106	4	104	95	0	1	1	176	94	99	101	90	87	29.7619	20	2	7	2	0	3	4.329	4	0	1	2	1	3	5	300		1	4	4	0	56	0	0	44	0	0	44
8763	12490	23949	5	-1	10.5654	0	106	104	106	4	104	95	0	1	2	142	94	99	101	90	87	29.7619	20	0	-3	0	1	2	-26.2478	-14	0	1	2	1	3	5	300		1	4	4	0	56	0	0	44	0	0	44
8763	12615	23949	6	0	10.5654	0	106	104	106	4	104	95	9	1	3	201	94	99	101	90	87	29.7619	20	3	-1	-3	10	5	22.0538	18	0	2	2	1	3	5	300	7
8764	12490	23949	5	-1	10.0342	1	91	102	83	4	110	110	1.5	1	1	176	84	99	90	84	80	4.7619	20	11	0	14	10	-2	11.1472	-4	0	1	2	1	3	5	300		1	4	4	0	56	0	0	44	0	0	44
8764	12490	23949	5	-1	10.0342	1	91	102	83	4	110	110	1.5	1	2	140	84	99	90	84	80	4.7619	20	3	0	2	1	6	-15.9091	-2	0	1	2	1	3	5	300		1	4	4	0	56	0	0	44	0	0	44
8764	12615	23949	6	0	10.0342	1	91	102	83	4	110	110	1.5	1	3	203	84	99	90	84	80	4.7619	20	6	-1	4	6	8	18.5567	8	0	2	2	1	3	5	300	7
8765	12490	23949	5	-1	10.4394	1	81	86	79	3	91	86	3	1	1	176	77	91	88	73	71	19.0476	8	3	3	3	4	-1	9.36147	10	0	1	2	1	3	5	300		1	4	4	0	56	0	0	44	0	0	44
8765	12490	23949	5	-1	10.4394	1	81	86	79	3	91	86	3	1	2	139	77	91	88	73	71	19.0476	8	-5	-5	-7	-3	6	-27.4287	-6	0	1	2	1	3	5	300		1	4	4	0	56	0	0	44	0	0	44
8765	12615	23949	6	0	10.4394	1	81	86	79	3	91	86	8	1	3	204	77	91	88	73	71	19.0476	8	16	4	10	25	0	26.8547	0	0	2	2	1	3	5	300	7
8766	12491	23949	5	0	10.026	0	95	92	99	3	105	94	5	1	1	180	76	90	81	84	67	0	16	11	4	16	0	8	11.9048	-8	0	1	2	2	3	5	275	8	1	6	4	0	45	0	0	50	0	5	55
8766	12491	23949	5	0	10.026	0	95	92	99	3	105	94	5	1	2	139	76	90	81	84	67	0	16	0	-3	-3	4	0	-6.02241	-4	0	1	2	2	3	5	275	8	1	6	4	0	45	0	0	50	0	5	55
8766	12614	23949	6	0	10.026	0	95	92	99	3	105	94	16	1	3	199	76	90	81	84	67	0	16	-6	6	2	-11	-9	-5.88235	12	1	2	2	2	3		360	8	1	3	3	10	41	0	0	0	49	0	31
8767	12491	23949	5	0	9.96578	0	111	121	98	4	109	100	10.5	1	1	180	99	100	110	89	91	10.2273	24	5	6	-1	9	6	11.2013	6	0	1	2	2	3	5	275	8	1	6	4	0	45	0	0	50	0	5	55
8767	12491	23949	5	0	9.96578	0	111	121	98	4	109	100	10.5	1	2	137	99	100	110	89	91	10.2273	24	-1	4	0	1	-3	-12.605	-18	0	1	2	2	3	5	275	8	1	6	4	0	45	0	0	50	0	5	55
8767	12614	23949	6	0	9.96578	0	111	121	98	4	109	100	4	1	3	201	99	100	110	89	91	10.2273	24	-3	-2	-3	-7	4	6.64039	14	1	2	2	2	3		360	8	1	3	3	10	41	0	0	0	49	0	31
8768	12491	23949	5	0	10.3874	1	101	103	98	5	118	102	0	1	1	180	94	96	100	92	87	2.27273	18	-4	4	-6	3	-9	31.0606	-2	0	1	2	2	3	5	275	8	1	6	4	0	45	0	0	50	0	5	55
8768	12491	23949	5	0	10.3874	1	101	103	98	5	118	102	0	1	2	135	94	96	100	92	87	2.27273	18	-2	1	6	-20	11	-33.3333	-2	0	1	2	2	3	5	275	8	1	6	4	0	45	0	0	50	0	5	55
8768	12615	23949	6	0	10.3874	1	101	103	98	5	118	102	2.5	1	3	203	94	96	100	92	87	2.27273	18	6	0	-1	11	13	11.3402	6	0	2	2	1	3	5	300	7
8769	12491	23949	5	0	10.6475	1	87	80	98	2	107	96	2.5	1	1	180	89	95	99	86	76	13.6364	18	-9	9	-9	-14	8	8.98268	8	0	1	2	2	3	5	275	8	1	6	4	0	45	0	0	50	0	5	55
8769	12491	23949	5	0	10.6475	1	87	80	98	2	107	96	2.5	1	2	136	89	95	99	86	76	13.6364	18	8	-2	11	8	-6	-11.8347	-8	0	1	2	2	3	5	275	8	1	6	4	0	45	0	0	50	0	5	55
8769	12615	23949	6	0	10.6475	1	87	80	98	2	107	96	11	1	3	202	89	95	99	86	76	13.6364	18	3	4	-2	4	9	-9.75339	6	0	2	2	1	3	5	300	7
8770	12491	23949	5	0	10.1492	1	92	92	94	4	123	120	11	1	1	180	103	96	107	94	107	23.8636	14	5	9	1	6	3	18.9935	6	0	1	2	2	3	5	275	8	1	6	4	0	45	0	0	50	0	5	55
8770	12491	23949	5	0	10.1492	1	92	92	94	4	123	120	11	1	2	136	103	96	107	94	107	23.8636	14	-7	0	-6	-9	6	-42.8571	-8	0	1	2	2	3	5	275	8	1	6	4	0	45	0	0	50	0	5	55
8770	12614	23949	6	0	10.1492	1	92	92	94	4	123	120	28.5	1	3	202	103	96	107	94	107	23.8636	14	6	2	5	6	0	31.9588	8	1	2	2	2	3		360	8	1	3	3	10	41	0	0	0	49	0	31
8771	12491	23949	5	0	10.3655	1	87	74	103	2	102	98	5.5	1	1	180	88	93	98	78	87	22.7273	16	-4	1	-2	-8	5	5.84416	0	0	1	2	2	3	5	275	8	1	6	4	0	45	0	0	50	0	5	55
8771	12491	23949	5	0	10.3655	1	87	74	103	2	102	98	5.5	1	2	135	88	93	98	78	87	22.7273	16	6	0	2	12	-1	-2.10084	-6	0	1	2	2	3	5	275	8	1	6	4	0	45	0	0	50	0	5	55
8771	12615	23949	6	0	10.3655	1	87	74	103	2	102	98	10.5	1	3	203	88	93	98	78	87	22.7273	16	1	4	1	7	-10	-4.8211	10	0	2	2	1	3	5	300	7
8772	12491	23949	5	0	10.4367	1	111	109	110	2	111	118	6	1	1	180	97	104	104	88	101	25	8	0	4	-2	3	-2	0	14	0	1	2	2	3	5	275	8	1	6	4	0	45	0	0	50	0	5	55
8772	12491	23949	5	0	10.4367	1	111	109	110	2	111	118	6	1	2	135	97	104	104	88	101	25	8	4	7	4	1	4	1.47059	-4	0	1	2	2	3	5	275	8	1	6	4	0	45	0	0	50	0	5	55
8772	12614	23949	6	0	10.4367	1	111	109	110	2	111	118	6	1	3	203	97	104	104	88	101	25	8	1	-5	-2	7	-3	4.45725	-4	1	2	2	2	3		360	8	1	3	3	10	41	0	0	0	49	0	31
8773	12491	23949	5	0	10.0862	0	111	105	113	6	105	96	4	1	1	180	107	102	109	98	108	17.0455	22	2	-2	-8	14	6	5.57359	10	0	1	2	2	3	5	275	8	1	6	4	0	45	0	0	50	0	5	55
8773	12491	23949	5	0	10.0862	0	111	105	113	6	105	96	4	1	2	135	107	102	109	98	108	17.0455	22	-2	-4	5	-15	2	-2.03081	-14	0	1	2	2	3	5	275	8	1	6	4	0	45	0	0	50	0	5	55
8773	12615	23949	6	0	10.0862	0	111	105	113	6	105	96	6.5	1	3	203	107	102	109	98	108	17.0455	22	12	4	2	26	2	13.4324	14	0	2	2	1	3	5	300	7
8774	12491	23949	5	0	9.91102	0	102	105	98	2	100	89	3	1	1	180	94	99	98	92	91	2.27273	16	1	1	6	-8	2	27.4892	12	0	1	2	2	3	5	275	8	1	6	4	0	45	0	0	50	0	5	55
8774	12491	23949	5	0	9.91102	0	102	105	98	2	100	89	3	1	2	135	94	99	98	92	91	2.27273	16	9	0	5	11	9	-14.0756	-12	0	1	2	2	3	5	275	8	1	6	4	0	45	0	0	50	0	5	55
8774	12615	23949	6	0	9.91102	0	102	105	98	2	100	89	6	1	3	203	94	99	98	92	91	2.27273	16	1	-1	1	3	-5	5.96321	6	0	2	2	1	3	5	300	7
8775	12491	23949	5	0	10.319	1	110	100	117	3	109	114	2	1	1	180	102	121	110	89	103	27.2727	18	-1	4	-8	6	3	-7.03463	10	0	1	2	2	3	5	275	8	1	6	4	0	45	0	0	50	0	5	55
8775	12491	23949	5	0	10.319	1	110	100	117	3	109	114	2	1	2	136	102	121	110	89	103	27.2727	18	-1	3	13	-13	-7	10.1541	-6	0	1	2	2	3	5	275	8	1	6	4	0	45	0	0	50	0	5	55
8775	12614	23949	6	0	10.319	1	110	100	117	3	109	114	11.5	1	3	202	102	121	110	89	103	27.2727	18	6	7	-3	14	1	-1.52618	6	1	2	2	2	3		360	8	1	3	3	10	41	0	0	0	49	0	31
8776	12491	23949	5	0	10.193	1	96	100	93	4	93	82	4	1	1	180	95	85	99	90	100	18.1818	20	0	4	2	-4	2	11.5801	2	0	1	2	2	3	5	275	8	1	6	4	0	45	0	0	50	0	5	55
8776	12491	23949	5	0	10.193	1	96	100	93	4	93	82	4	1	2	135	95	85	99	90	100	18.1818	20	2	0	-2	4	4	-1.33053	-4	0	1	2	2	3	5	275	8	1	6	4	0	45	0	0	50	0	5	55
8776	12615	23949	6	0	10.193	1	96	100	93	4	93	82	10.5	1	3	203	95	85	99	90	100	18.1818	20	-1	4	-6	4	6	-2.65818	4	0	2	2	1	3	5	300	7
8777	12491	23949	5	0	10.5572	0	67	73	70	4	90	76	4.5	1	1	180	78	84	90	73	71	3.40909	12	3	-1	0	7	2	4.92424	4	0	1	2	2	3	5	275	8	1	6	4	0	45	0	0	50	0	5	55
8777	12491	23949	5	0	10.5572	0	67	73	70	4	90	76	4.5	1	2	137	78	84	90	73	71	3.40909	12	1	3	6	-6	0	0.490196	-6	0	1	2	2	3	5	275	8	1	6	4	0	45	0	0	50	0	5	55
8777	12615	23949	6	0	10.5572	0	67	73	70	4	90	76	4.5	1	3	201	78	84	90	73	71	3.40909	12	-6	-4	-6	-3	-4	8.70224		0	2	2	1	3	5	300	7
8778	12491	23949	5	0	10.5489	0	71	83	67	3	105	79	1.5	1	1	180	63	87	67	60	93	13.6364	14	12	-5	12	20	-16	-5.30303	4	0	1	2	2	3	5	275	8	1	6	4	0	45	0	0	50	0	5	55
8778	12491	23949	5	0	10.5489	0	71	83	67	3	105	79	1.5	1	2	137	63	87	67	60	93	13.6364	14	7	5	10	-3	12	6.37255	-10	0	1	2	2	3	5	275	8	1	6	4	0	45	0	0	50	0	5	55
8778	12615	23949	6	0	10.5489	0	71	83	67	3	105	79	11.5	1	3	201	63	87	67	60	93	13.6364	14	-6	6	1	-17	3	-14.7059	2	0	2	2	1	3	5	300	7
8779	12491	23949	5	0	10.4038	1	95	103	88	2	110	95	20	1	1	180	84	95	90	84	81	14.7727	10	7	-5	9	0	9	-4.05844	6	0	1	2	2	3	5	275	8	1	6	4	0	45	0	0	50	0	5	55
8779	12491	23949	5	0	10.4038	1	95	103	88	2	110	95	20	1	2	136	84	95	90	84	81	14.7727	10	-5	0	-7	1	-6	-6.79272	-2	0	1	2	2	3	5	275	8	1	6	4	0	45	0	0	50	0	5	55
8779	12614	23949	6	0	10.4038	1	95	103	88	2	110	95	25.5	1	3	202	84	95	90	84	81	14.7727	10	-2	3	-2	-6	6	10.5114	2	1	2	2	2	3		360	8	1	3	3	10	41	0	0	0	49	0	31
8780	12491	23949	5	0	9.78508	0	110	110	106	3	100	93	2.5	1	1	180	79	97	91	75	67	7.95455	12	-1	0	3	-8	3	0.378788	4	0	1	2	2	3	5	275	8	1	6	4	0	45	0	0	50	0	5	55
8780	12491	23949	5	0	9.78508	0	110	110	106	3	100	93	2.5	1	2	136	79	97	91	75	67	7.95455	12	-11	9	-5	-23	4	-1.47059	-6	0	1	2	2	3	5	275	8	1	6	4	0	45	0	0	50	0	5	55
8780	12615	23949	6	0	9.78508	0	110	110	106	3	100	93	6.5	1	3	202	79	97	91	75	67	7.95455	12	11	-10	4	28	-7	-3.76996	2	0	2	2	1	3	5	300	7
8781	12491	23949	5	0	10.1355	0	92	92	94	4	110	110	0	1	1	180	85	88	95	72	96	13.6364	14	6	-5	-3	11	16	13.7446	4	0	1	2	2	3	5	275	8	1	6	4	0	45	0	0	50	0	5	55
8781	12491	23949	5	0	10.1355	0	92	92	94	4	110	110	0	1	2	136	85	88	95	72	96	13.6364	14	4	1	10	-3	-1	-7.77311	-8	0	1	2	2	3	5	275	8	1	6	4	0	45	0	0	50	0	5	55
8781	12614	23949	6	0	10.1355	0	92	92	94	4	110	110	9	1	3	202	85	88	95	72	96	13.6364	14	-2	-3	-7	7	-7	-8.26764	4	1	2	2	2	3		360	8	1	3	3	10	41	0	0	0	49	0	31
8782	12491	23949	5	0	9.79329	1	91	97	88	2	97	87	11.5	1	1	180	100	100	99	97	108	23.8636	18	5	12	11	-1	-5	22.5649	10	0	1	2	2	3	5	275	8	1	6	4	0	45	0	0	50	0	5	55
8782	12491	23949	5	0	9.79329	1	91	97	88	2	97	87	11.5	1	2	136	100	100	99	97	108	23.8636	18	11	-9	8	11	4	-17.9972	-8	0	1	2	2	3	5	275	8	1	6	4	0	45	0	0	50	0	5	55
8782	12615	23949	6	0	9.79329	1	91	97	88	2	97	87	6	1	3	202	100	100	99	97	108	23.8636	18	0	13	-3	3	3	1.46553	8	0	2	2	1	3	5	300	7
8783	12491	23949	5	0	10.6311	1	98	100	96	2	104	98	9	1	1	180	89	82	99	83	82	13.6364	12	-1	-1	-4	0	6	8.98268	2	0	1	2	2	3	5	275	8	1	6	4	0	45	0	0	50	0	5	55
8783	12491	23949	5	0	10.6311	1	98	100	96	2	104	98	9	1	2	136	89	82	99	83	82	13.6364	12	-2	0	-4	4	-2	-11.8347	-4	0	1	2	2	3	5	275	8	1	6	4	0	45	0	0	50	0	5	55
8783	12615	23949	6	0	10.6311	1	98	100	96	2	104	98	8.5	1	3	202	89	82	99	83	82	13.6364	12	3	-1	3	4	-1	-4.90196	0	0	2	2	1	3	5	300	7
8784	12491	23949	5	0	9.91923	0	90	102	81	5	110	108	0	1	1	180	91	89	96	92	83	2.27273	10	3	3	2	3	3	8.44156	10	0	1	2	2	3	5	275	8	1	6	4	0	45	0	0	50	0	5	55
8784	12491	23949	5	0	9.91923	0	90	102	81	5	110	108	0	1	2	136	91	89	96	92	83	2.27273	10	-9	-3	-7	-13	0	-5.81232	-10	0	1	2	2	3	5	275	8	1	6	4	0	45	0	0	50	0	5	55
8784	12615	23949	6	0	9.91923	0	90	102	81	5	110	108	0	1	3	202	91	89	96	92	83	2.27273	10	6	-1	5	6	5	13.6547	10	0	2	2	1	3	5	300	7
8785	12491	23949	5	0	10.1629	0	100	98	101	4	107	94	20	1	1	180	95	92	106	86	87	11.3636	20	2	2	0	4	5	7.68398	0	0	1	2	2	3	5	275	8	1	6	4	0	45	0	0	50	0	5	55
8785	12491	23949	5	0	10.1629	0	100	98	101	4	107	94	20	1	2	136	95	92	106	86	87	11.3636	20	-2	-1	0	-3	-7	-6.30252	-6	0	1	2	2	3	5	275	8	1	6	4	0	45	0	0	50	0	5	55
8785	12614	23949	6	0	10.1629	0	100	98	101	4	107	94	9.5	1	3	202	95	92	106	86	87	11.3636	20	-10	-4	-11	-4	-9	-2.43582	4	1	2	2	2	3		360	8	1	3	3	10	41	0	0	0	49	0	31
8786	12491	23949	5	0	9.73306	0	92	101	86	3	104	84	9.5	1	1	180	89	80	99	83	77	7.95455	12	-5	2	-11	3	6	15.855	6	0	1	2	2	3	5	275	8	1	6	4	0	45	0	0	50	0	5	55
8786	12491	23949	5	0	9.73306	0	92	101	86	3	104	84	9.5	1	2	137	89	80	99	83	77	7.95455	12	1	0	4	-3	-4	-3.22129	-16	0	1	2	2	3	5	275	8	1	6	4	0	45	0	0	50	0	5	55
8786	12614	23949	6	0	9.73306	0	92	101	86	3	104	84	12.5	1	3	201	89	80	99	83	77	7.95455	12	3	-2	9	-4	-3	-12.3408	10	1	2	2	2	3		360	8	1	3	3	10	41	0	0	0	49	0	31
8787	12491	23949	5	0	10.3299	0	110	106	111	3	111	100	10	1	1	180	96	113	103	88	97	19.3182	18	4	7	8	0	1	19.9675	8	0	1	2	2	3	5	275	8	1	6	4	0	45	0	0	50	0	5	55
8787	12491	23949	5	0	10.3299	0	110	106	111	3	111	100	10	1	2	135	96	113	103	88	97	19.3182	18	0	-9	4	-2	-10	-23.5994	-6	0	1	2	2	3	5	275	8	1	6	4	0	45	0	0	50	0	5	55
8787	12615	23949	6	0	10.3299	0	110	106	111	3	111	100	13	1	3	203	96	113	103	88	97	19.3182	18	4	1	-5	10	11	8.02507	6	0	2	2	1	3	5	300	7
8788	12491	23949	5	0	10.4832	1	117	106	123	5	97	92	6	1	1	180	98	117	107	91	91	11.3636	26	0	5	-1	3	-5	21.9697	6	0	1	2	2	3	5	275	8	1	6	4	0	45	0	0	50	0	5	55
8788	12491	23949	5	0	10.4832	1	117	106	123	5	97	92	6	1	2	135	98	117	107	91	91	11.3636	26	-5	1	-2	-13	9	-4.90196	-12	0	1	2	2	3	5	275	8	1	6	4	0	45	0	0	50	0	5	55
8788	12614	23949	6	0	10.4832	1	117	106	123	5	97	92	2	1	3	203	98	117	107	91	91	11.3636	26	4	2	4	7	-5	-1.62725	14	1	2	2	2	3		360	8	1	3	3	10	41	0	0	0	49	0	31
8789	12491	23949	5	0	10.2724	1	105	98	110	3	111	110	15.5	1	1	180	92	94	94	86	105	11.3636	14	8	6	11	6	0	13.6364	16	0	1	2	2	3	5	275	8	1	6	4	0	45	0	0	50	0	5	55
8789	12491	23949	5	0	10.2724	1	105	98	110	3	111	110	15.5	1	2	135	92	94	94	86	105	11.3636	14	-2	2	-6	-2	7	-5.39216	-16	0	1	2	2	3	5	275	8	1	6	4	0	45	0	0	50	0	5	55
8789	12614	23949	6	0	10.2724	1	105	98	110	3	111	110	6	1	3	203	92	94	94	86	105	11.3636	14	5	-1	3	6	0	12.3509	10	1	2	2	2	3		360	8	1	3	3	10	41	0	0	0	49	0	31
8790	12540	23970	2	1	6.91034	0	117	107	121	2	108	124	11	0	1	192	135	121	140	120	104	30	36	-1	-2	-9	4	15	13.9024	4	1	1	1	2	2	5	300		0	5	4	5	0	33	8	54	0	0	47
8790	12540	23970	2	1	6.91034	0	117	107	121	2	108	124	11	0	2	138	135	121	140	120	104	30	36	-9	-5	-4	-9	-15	-32.7913	-8	1	1	1	2	2	5	300		0	5	4	5	0	33	8	54	0	0	47
8790	12688	23970	3	0	6.91034	0	117	107	121	2	108	124	16	0	3	203	135	121	140	120	104	30	36	-13	-3	-9	-22	13	9.34343	-8	1	2	3	1	3	5	250	8
8791	12540	23970	2	1	6.78439	1	106	105	105	3	110	114	6.5	0	1	192	104	106	101	105	113	15	18	18	4	24	-3	9	16.7073	16	1	1	1	2	2	5	300		0	5	4	5	0	33	8	54	0	0	47
8791	12540	23970	2	1	6.78439	1	106	105	105	3	110	114	6.5	0	2	138	104	106	101	105	113	15	18	-10	-5	-13	6	-16	-20.5962	-10	1	1	1	2	2	5	300		0	5	4	5	0	33	8	54	0	0	47
8791	12688	23970	3	0	6.78439	1	106	105	105	3	110	114	4.5	0	3	203	104	106	101	105	113	15	18	-10	-1	-6	-14	-3	20.7071	-8	1	2	3	1	3	5	250	8
8792	12540	23970	2	1	7.65503	0	97	91	104	3	122	113	6.5	0	1	192	123	118	128	108	105	35	32	-4	-2	-5	-4	3	25.9756	8	1	1	1	2	2	5	300		0	5	4	5	0	33	8	54	0	0	47
8792	12540	23970	2	1	7.65503	0	97	91	104	3	122	113	6.5	0	2	139	123	118	128	108	105	35	32	-5	-2	-1	-3	-10	-29.8645	-2	1	1	1	2	2	5	300		0	5	4	5	0	33	8	54	0	0	47
8792	12689	23970	3	1	7.65503	0	97	91	104	3	122	113	5	0	3	202	123	118	128	108	105	35	32	-8	-5	-6	-6	-4	-8.38384	-6	1	2	2	2	4	4	400	8
8793	12541	23970	5	-1	9.90281	1	94	92	98	4	76	77	2	0	1	192	89	89	100	81	77	0	6	2	-3	0	11	-10	14.2857	10	1	1	3	2	3	5	300	8	0	6	4	22	0	52	0	26	0	0	0
8793	12541	23970	5	-1	9.90281	1	94	92	98	4	76	77	2	0	2	136	89	89	100	81	77	0	6	2	-1	9	-7	5	10.4566	2	1	1	3	2	3	5	300	8	0	6	4	22	0	52	0	26	0	0	0
8793	12690	23970	6	-1	9.90281	1	94	92	98	4	76	77	3	0	3	205	89	89	100	81	77	0	6	-4	6	-7	-3	5	-5.13442	-10	1	2	1	2	3	5	300	7
8794	12541	23970	5	-1	10.6667	1	106	104	105	4	100	98	6	0	1	192	99	114	113	86	88	4.54545	8	-7	-8	-10	-3	0	7.35931	10	1	1	3	2	3	5	300	8	0	6	4	22	0	52	0	26	0	0	0
8794	12541	23970	5	-1	10.6667	1	106	104	105	4	100	98	6	0	2	137	99	114	113	86	88	4.54545	8	1	7	-2	7	-5	3.55916	10	1	1	3	2	3	5	300	8	0	6	4	22	0	52	0	26	0	0	0
8794	12690	23970	6	-1	10.6667	1	106	104	105	4	100	98	8.5	0	3	204	99	114	113	86	88	4.54545	8	-3	8	-9	1	13	8.06549	-8	1	2	1	2	3	5	300	7
8795	12541	23970	5	-1	10.256	1	71	58	91	4	111	114	4	0	1	192	97	93	105	89	94	20.4545	22	-3	5	-6	-3	6	11.6883	-6	1	1	3	2	3	5	300	8	0	6	4	22	0	52	0	26	0	0	0
8795	12541	23970	5	-1	10.256	1	71	58	91	4	111	114	4	0	2	135	97	93	105	89	94	20.4545	22	-1	10	0	-3	3	-5.33873	6	1	1	3	2	3	5	300	8	0	6	4	22	0	52	0	26	0	0	0
8795	12690	23970	6	-1	10.256	1	71	58	91	4	111	114	3.5	0	3	206	97	93	105	89	94	20.4545	22	5	-10	6	-3	11	6.52921	2	1	2	1	2	3	5	300	7
8796	12541	23970	5	-1	10.4476	0	95	99	92	4	110	100	8	0	1	192	90	102	104	77	85	12.5	6	2	-1	-4	7	5	20.8333	12	1	1	3	2	3	5	300	8	0	6	4	22	0	52	0	26	0	0	0
8796	12541	23970	5	-1	10.4476	0	95	99	92	4	110	100	8	0	2	134	90	102	104	77	85	12.5	6	-2	13	2	-6	0	-16.8385	-4	1	1	3	2	3	5	300	8	0	6	4	22	0	52	0	26	0	0	0
8796	12690	23970	6	-1	10.4476	0	95	99	92	4	110	100	1.5	0	3	207	90	102	104	77	85	12.5	6	6	-6	-2	11	13	6.05417	8	1	2	1	2	3	5	300	7
8797	12541	23970	5	-1	10.1875	1	68	70	75	6	104	102	13	0	1	192	88	98	94	86	81	14.7727	10	-3	-1	1	-10	9	5.46537	6	1	1	3	2	3	5	300	8	0	6	4	22	0	52	0	26	0	0	0
8797	12541	23970	5	-1	10.1875	1	68	70	75	6	104	102	13	0	2	135	88	98	94	86	81	14.7727	10	1	4	0	0	1	-5.80511	0	1	1	3	2	3	5	300	8	0	6	4	22	0	52	0	26	0	0	0
8797	12690	23970	6	-1	10.1875	1	68	70	75	6	104	102		0	3		88	98	94	86	81	14.7727	10								1	2	1	2	3	5	300	7
8798	12541	23970	5	-1	10.3299	1	84	87	86	4	76	81		0	1	192	87	75	104	71	79	1.13636	10	-8	5	-13	0	-1	19.1017	0	1	1	3	2	3	5	300	8	0	6	4	22	0	52	0	26	0	0	0
8798	12541	23970	5	-1	10.3299	1	84	87	86	4	76	81		0	2	135	87	75	104	71	79	1.13636	10	6	-2	1	15	-4	-8.89789	4	1	1	3	2	3	5	300	8	0	6	4	22	0	52	0	26	0	0	0
8798	12690	23970	6	-1	10.3299	1	84	87	86	4	76	81		0	3	206	87	75	104	71	79	1.13636	10	-10	-4	-4	-21	6	11.2088	0	1	2	1	2	3	5	300	7
8799	12541	23970	5	-1	10.4942	1	82	80	89	2	102	108	7.5	0	1	192	85	90	93	80	88	17.0455	16	2	5	0	0	7	7.95455	2	1	1	3	2	3	5	300	8	0	6	4	22	0	52	0	26	0	0	0
8799	12541	23970	5	-1	10.4942	1	82	80	89	2	102	108	7.5	0	2	135	85	90	93	80	88	17.0455	16	-2	0	5	-6	-13	-12.6289	2	1	1	3	2	3	5	300	8	0	6	4	22	0	52	0	26	0	0	0
8799	12690	23970	6	-1	10.4942	1	82	80	89	2	102	108	8	0	3	206	85	90	93	80	88	17.0455	16	-1	0	-4	-3	13	17.0406	-4	1	2	1	2	3	5	300	7
8800	12541	23970	5	-1	10.0479	0	99	105	93	3	102	102	5	0	1	192	92	91	104	83	79	14.7727	16	4	-1	0	11	-1	1.89394	4	1	1	3	2	3	5	300	8	0	6	4	22	0	52	0	26	0	0	0
8800	12541	23970	5	-1	10.0479	0	99	105	93	3	102	102	5	0	2	135	92	91	104	83	79	14.7727	16	2	-2	4	0	3	4.98282	-6	1	1	3	2	3	5	300	8	0	6	4	22	0	52	0	26	0	0	0
8800	12690	23970	6	-1	10.0479	0	99	105	93	3	102	102	3.5	0	3	206	92	91	104	83	79	14.7727	16	-11	4	-12	-13	7	-1.06125	6	1	2	1	2	3	5	300	7
8801	12541	23970	5	-1	10.6585	1	83	88	83	3	88	87	7.5	0	1	192	74	82	86	67	75	5.68182	12	4	8	1	9	3	5.03247	6	1	1	3	2	3	5	300	8	0	6	4	22	0	52	0	26	0	0	0
8801	12541	23970	5	-1	10.6585	1	83	88	83	3	88	87	7.5	0	2	137	74	82	86	67	75	5.68182	12	1	-2	2	1	-4	8.87334	-4	1	1	3	2	3	5	300	8	0	6	4	22	0	52	0	26	0	0	0
8801	12690	23970	6	-1	10.6585	1	83	88	83	3	88	87	12	0	3	204	74	82	86	67	75	5.68182	12	-4	1	-5	-3	2	5.90257	2	1	2	1	2	3	5	300	7
8802	12541	23970	5	-1	9.86995	1	83	64	107	2	127	110	4.5	0	1	192	74	107	88	61	79	1.13636	12	12	7	12	9	8	-1.13636	10	1	1	3	2	3	5	300	8	0	6	4	22	0	52	0	26	0	0	0
8802	12541	23970	5	-1	9.86995	1	83	64	107	2	127	110	4.5	0	2	135	74	107	88	61	79	1.13636	12	2	10	1	5	2	3.09278	-8	1	1	3	2	3	5	300	8	0	6	4	22	0	52	0	26	0	0	0
8802	12690	23970	6	-1	9.86995	1	83	64	107	2	127	110	7	0	3	206	74	107	88	61	79	1.13636	12	-7	-2	-5	-16	6	18.4758	0	1	2	1	2	3	5	300	7
8803	12541	23970	5	-1	10.5161	1	87	91	86	2	109	122	11.5	0	1	192	94	97	99	90	89	18.1818	20	-1	6	-2	4	-3	-1.51515	0	1	1	3	2	3	5	300	8	0	6	4	22	0	52	0	26	0	0	0
8803	12541	23970	5	-1	10.5161	1	87	91	86	2	109	122	11.5	0	2	135	94	97	99	90	89	18.1818	20	-3	5	1	-13	7	-5.32646	8	1	1	3	2	3	5	300	8	0	6	4	22	0	52	0	26	0	0	0
8803	12691	23970	6	1	10.5161	1	87	91	86	2	109	122	10.5	0	3	206	94	97	99	90	89	18.1818	20	4	-5	0	11	2	7.28724	-2	1	2	2	2	4		260	6
8804	12541	23970	5	-1	10.4312	1	80	83	83	3	110	94	8	0	1	192	90	88	100	84	80	11.3636	12	-4	-2	-4	-7	7	13.6364	10	1	1	3	2	3	5	300	8	0	6	4	22	0	52	0	26	0	0	0
8804	12541	23970	5	-1	10.4312	1	80	83	83	3	110	94	8	0	2	135	90	88	100	84	80	11.3636	12	0	7	2	-2	-3	-2.31959	-8	1	1	3	2	3	5	300	8	0	6	4	22	0	52	0	26	0	0	0
8804	12690	23970	6	-1	10.4312	1	80	83	83	3	110	94	10	0	3	206	90	88	100	84	80	11.3636	12	0	-4	-6	0	19	9.67253	4	1	2	1	2	3	5	300	7
8805	12541	23970	5	-1	10.3409	0	90	90	93	4	88	92	17.5	0	1	192	92	92	98	85	93	13.6364	22	1	6	2	-3	8	8.98268	0	1	1	3	2	3	5	300	8	0	6	4	22	0	52	0	26	0	0	0
8805	12541	23970	5	-1	10.3409	0	90	90	93	4	88	92	17.5	0	2	135	92	92	98	85	93	13.6364	22	-4	-9	-6	0	-4	-0.969563	2	1	1	3	2	3	5	300	8	0	6	4	22	0	52	0	26	0	0	0
8805	12690	23970	6	-1	10.3409	0	90	90	93	4	88	92	12.5	0	3	206	92	92	98	85	93	13.6364	22	2	2	10	-3	-12	8.74267	-14	1	2	1	2	3	5	300	7
8807	12541	23970	5	-1	10.653	0	86	91	85	3	102	108	8	0	1	192	89	93	101	79	85	4.54545	16	6	0	2	4	17	24.026	2	1	1	3	2	3	5	300	8	0	6	4	22	0	52	0	26	0	0	0
8807	12541	23970	5	-1	10.653	0	86	91	85	3	102	108	8	0	2	137	89	93	101	79	85	4.54545	16	-3	7	-4	4	-11	3.38733	8	1	1	3	2	3	5	300	8	0	6	4	22	0	52	0	26	0	0	0
8807	12690	23970	6	-1	10.653	0	86	91	85	3	102	108	1	0	3	204	89	93	101	79	85	4.54545	16	3	-5	8	-6	2	1.37457	-6	1	2	1	2	3	5	300	7
8808	12492	23950	2	0	7.02533	1	118	116	114	3	108	105	13.5	1	1	198	101	120	94	111	103	21.9512	16	3	-1	24	-23	-14	-1.95122	2	1	1	2	1	4	5	500	8
8808	12492	23950	2	0	7.02533	1	118	116	114	3	108	105	13.5	1	2	151	101	120	94	111	103	21.9512	16	-6	-2	-15	5	6	-15.4545	0	1	1	2	1	4	5	500	8
8808	13374	23950	3		7.02533	1	118	116	114	3	108	105	12.5	1	3		101	120	94	111	103	21.9512	16
8809	12492	23950	2	0	7.39767	0	94	82	107	2	95	96	17	1	1	178	100	108	105	98	83	4.87805	24	2	1	3	-3	14	32.622	1	1	1	2	1	4	5	500	8
8809	12492	23950	2	0	7.39767	0	94	82	107	2	95	96	17	1	2	151	100	108	105	98	83	4.87805	24		0	-6	2		-12.5	-7	1	1	2	1	4	5	500	8
8809	13374	23950	3		7.39767	0	94	82	107	2	95	96	19.5	1	3		100	108	105	98	83	4.87805	24
8810	12492	23950	2	0	7.14853	1	109	105	110	4	114	118	6	1	1	198	95	116	96	94	101	17.0732	26	12	4	16	9	-14	12.9268	2	1	1	2	1	4	5	500	8
8810	12492	23950	2	0	7.14853	1	109	105	110	4	114	118	6	1	2	150	95	116	96	94	101	17.0732	26	-9	-2	-3	-11	-10	-23.1818	-14	1	1	2	1	4	5	500	8
8810	13374	23950	3		7.14853	1	109	105	110	4	114	118	3	1	3		95	116	96	94	101	17.0732	26
8811	12492	23950	2	0	7.17317	1	94	82	107	3	104	109	8	1	1	198	102	111	101	107	92	19.5122	10	0	-5	7	-9	-9	10.4878	2.5	1	1	2	1	4	5	500	8
8811	12492	23950	2	0	7.17317	1	94	82	107	3	104	109	8	1	2	151	102	111	101	107	92	19.5122	10	-15	-3	-17	-12	0	-23.1818	-2.5	1	1	2	1	4	5	500	8
8811	13374	23950	3		7.17317	1	94	82	107	3	104	109	3	1	3		102	111	101	107	92	19.5122	10
8812	12492	23950	2	0	7.05544	0	111	112	106	4	101	103	7.5	1	1	198	139	118	139	122	122	56.0976	34	1	1	-2	0	9	43.9024	3.5	1	1	2	1	4	5	500	8
8812	12492	23950	2	0	7.05544	0	111	112	106	4	101	103	7.5	1	2	151	139	118	139	122	122	56.0976	34	-9	-1	-5	-15	4	-61.3636	-17.5	1	1	2	1	4	5	500	8
8812	13374	23950	3		7.05544	0	111	112	106	4	101	103	2	1	3		139	118	139	122	122	56.0976	34
8813	12492	23950	2	0	7.14305	1	115	110	115	4	116	121	7	1	1	198	114	115	123	94	108	41.4634	16	6	5	-3	16	6	21.0366	24	1	1	2	1	4	5	500	8
8813	12492	23950	2	0	7.14305	1	115	110	115	4	116	121	7	1	2	150	114	115	123	94	108	41.4634	16	-13	-1	-5	-18	-10	-48.8636	-20	1	1	2	1	4	5	500	8
8813	13374	23950	3		7.14305	1	115	110	115	4	116	121	4.5	1	3		114	115	123	94	108	41.4634	16
8814	12492	23950	2	0	6.71869	0	97	93	101	5	127	127	11	1	1	198	122	115	119	118	113	29.2683	24	12	-1	11	2	21	25.7317	-1.5	1	1	2	1	4	5	500	8
8814	12492	23950	2	0	6.71869	0	97	93	101	5	127	127	11	1	2	151	122	115	119	118	113	29.2683	24	-14	0	-8	-17	-15	-45.9091	-8.5	1	1	2	1	4	5	500	8
8814	13374	23950	3		6.71869	0	97	93	101	5	127	127	8.5	1	3		122	115	119	118	113	29.2683	24
8815	12492	23950	2	0	7.55921	0	83	71	97	3	80	84	6	1	1	198	99	104	106	98	76	12.1951	20	-5	0	-5	-6	-4	-2.19512	15	1	1	2	1	4	5	500	8
8815	12492	23950	2	0	7.55921	0	83	71	97	3	80	84	6	1	2	153	99	104	106	98	76	12.1951	20	-9	0	-11	-6	6	-3.18182	-23	1	1	2	1	4	5	500	8
8815	13374	23950	3		7.55921	0	83	71	97	3	80	84	2.5	1	3		99	104	106	98	76	12.1951	20
8816	12492	23950	2	0	7.52909	1	116	121	106	2	86	95	13	1	1	198	93	103	90	100	93	21.9512	30	23	6	32	2	7	43.0488	5	1	1	2	1	4	5	500	8
8816	12492	23950	2	0	7.52909	1	116	121	106	2	86	95	13	1	2	152	93	103	90	100	93	21.9512	30	-10	-3	-4	-12	-6	-49.0909	-7	1	1	2	1	4	5	500	8
8816	13374	23950	3		7.52909	1	116	121	106	2	86	95	16	1	3		93	103	90	100	93	21.9512	30
8818	12492	23950	2	0	7.26078	1	115	110	115	2	106	106	10.5	1	1	198	113	105	113	111	99	12.1951	20	-3	2	6	-15	-4	7.80488	0	1	1	2	1	4	5	500	8
8818	12492	23950	2	0	7.26078	1	115	110	115	2	106	106	10.5	1	2	151	113	105	113	111	99	12.1951	20	-11	0	-9	-6	-9	0.454545	-2	1	1	2	1	4	5	500	8
8818	13374	23950	3		7.26078	1	115	110	115	2	106	106	14	1	3		113	105	113	111	99	12.1951	20
8819	12492	23950	2	0	6.9514	0	107	96	116	1	102	124	6	1	1	198	113	119	115	107	94	9.7561	14	-6	-4	-3	-9	6	-9.7561	1	1	1	2	1	4	5	500	8
8819	12492	23950	2	0	6.9514	0	107	96	116	1	102	124	6	1	2	151	113	119	115	107	94	9.7561	14	1	1	6	-3	-5	9.09091	-1	1	1	2	1	4	5	500	8
8819	13374	23950	3		6.9514	0	107	96	116	1	102	124	4.5	1	3		113	119	115	107	94	9.7561	14
8820	12492	23950	2	0	6.78166	0	97	87	108	4	108	114	3	1	1	198	106	120	104	105	109	24.3902	14	-15	-4	-1	-25	-16	-4.39024	2	1	1	2	1	4	5	500	8
8820	12492	23950	2	0	6.78166	0	97	87	108	4	108	114	3	1	2	152	106	120	104	105	109	24.3902	14	6	-2	0	8	7	-6.36364	-6	1	1	2	1	4	5	500	8
8820	13374	23950	3		6.78166	0	97	87	108	4	108	114	5	1	3		106	120	104	105	109	24.3902	14
8821	12493	23950	5	0	9.99316	0	107	108	103	5	95	96	18.5	1	1	198	100	101	105	99	85	5.95238	24	-5	3	4	-15	0	13.3658	-2	1	1	2	1	3	5	500	8	1	5	4	4.5	20	2.5	0	73	0	0	73
8821	12493	23950	5	0	9.99316	0	107	108	103	5	95	96	18.5	1	2	151	100	101	105	99	85	5.95238	24	3	-4	-3	7	7	-8.53387	-6	1	1	2	1	3	5	500	8	1	5	4	4.5	20	2.5	0	73	0	0	73
8821	13373	23950	6		9.99316	0	107	108	103	5	95	96	11.5	1	3		100	101	105	99	85	5.95238	24
8822	12493	23950	5	0	10.4422	1	116	119	108	6	107	94	22.5	1	1	198	82	94	98	69	77	7.14286	12	10	3	2	22	2	8.76623	12	1	1	2	1	3	5	500	8	1	5	4	4.5	20	2.5	0	73	0	0	73
8822	12493	23950	5	0	10.4422	1	116	119	108	6	107	94	22.5	1	2	150	82	94	98	69	77	7.14286	12	-1	7	-2	0	-2	7.62032	-14	1	1	2	1	3	5	500	8	1	5	4	4.5	20	2.5	0	73	0	0	73
8822	13373	23950	6		10.4422	1	116	119	108	6	107	94	9.5	1	3		82	94	98	69	77	7.14286	12
8823	12493	23950	5	0	10.0233	1	95	92	99	4	76	86	4.5	1	1	198	91	92	105	81	78	4.7619	14	-1	0	-7	0	15	10.0108	0	1	1	2	1	3	5	500	8	1	5	4	4.5	20	2.5	0	73	0	0	73
8823	12493	23950	5	0	10.0233	1	95	92	99	4	76	86	4.5	1	2	151	91	92	105	81	78	4.7619	14	-1	1	-3	-1	7	-1.04724	0	1	1	2	1	3	5	500	8	1	5	4	4.5	20	2.5	0	73	0	0	73
8823	13373	23950	6		10.0233	1	95	92	99	4	76	86	3	1	3		91	92	105	81	78	4.7619	14
8825	12493	23950	5	0	10.3874	1	94	108	82	4	107	110	12	1	1	198	86	91	96	85	70		14	-3	3	-2	-15	25		2	1	1	2	1	3	5	500	8	1	5	4	4.5	20	2.5	0	73	0	0	73
8825	12493	23950	5	0	10.3874	1	94	108	82	4	107	110	12	1	2	150	86	91	96	85	70		14	-1	1	-5	5	-3	-9.98217	-4	1	1	2	1	3	5	500	8	1	5	4	4.5	20	2.5	0	73	0	0	73
8825	13373	23950	6		10.3874	1	94	108	82	4	107	110	11	1	3		86	91	96	85	70		14
8826	12493	23950	5	0	10.2286	0	104	100	107	4	93	91	19	1	1	198	90	95	104	90	58		22	-1	7	5	-11	5		-4	1	1	2	1	3	5	500	8	1	5	4	4.5	20	2.5	0	73	0	0	73
8826	12493	23950	5	0	10.2286	0	104	100	107	4	93	91	19	1	2	151	90	95	104	90	58		22			0	-11			-8	1	1	2	1	3	5	500	8	1	5	4	4.5	20	2.5	0	73	0	0	73
8826	13373	23950	6		10.2286	0	104	100	107	4	93	91	34.5	1	3		90	95	104	90	58		22
8827	12493	23950	5	0	10.5736	1	113	104	118	5	104	73	6	1	1	198	86	104	95	83	79	0	16	6	-12	6	-7	24	15.9091	8	1	1	2	1	3	5	500	8	1	5	4	4.5	20	2.5	0	73	0	0	73
8827	12493	23950	5	0	10.5736	1	113	104	118	5	104	73	6	1	2	152	86	104	95	83	79	0	16	1	28	2	4	-6	-0.222816	-6	1	1	2	1	3	5	500	8	1	5	4	4.5	20	2.5	0	73	0	0	73
8827	13373	23950	6		10.5736	1	113	104	118	5	104	73	11	1	3		86	104	95	83	79	0	16
8828	12493	23950	5	0	10.2916	0	97	100	94	5	100	105	27	1	1	179	89	99	103	75	86	14.2857	18	4	-4	-4	7	20	-10.8766	0	1	1	2	1	3	5	500	8	1	5	4	4.5	20	2.5	0	73	0	0	73
8828	12493	23950	5	0	10.2916	0	97	100	94	5	100	105	27	1	2	150	89	99	103	75	86	14.2857	18	2	10	8	-3	-7	5.41444	-10	1	1	2	1	3	5	500	8	1	5	4	4.5	20	2.5	0	73	0	0	73
8828	13373	23950	6		10.2916	0	97	100	94	5	100	105	31	1	3		89	99	103	75	86	14.2857	18
8829	12493	23950	5	0	10.5736	0	129	126	125	5	97	92	4.5	1	1	198	95	107	108	86	84	17.8571	26	4	2	2	4	7	9.41558	2	1	1	2	1	3	5	500	8	1	5	4	4.5	20	2.5	0	73	0	0	73
8829	12493	23950	5	0	10.5736	0	129	126	125	5	97	92	4.5	1	2	152	95	107	108	86	84	17.8571	26	3	13	-1	10	-8	-16.4884	-2	1	1	2	1	3	5	500	8	1	5	4	4.5	20	2.5	0	73	0	0	73
8829	13373	23950	6		10.5736	0	129	126	125	5	97	92	7.5	1	3		95	107	108	86	84	17.8571	26
8830	12542	23971	2	-1	7.0308	1	119	123	110	3	103	108		0	1		97	112	92	107	93	31.7073	24								1	1	2	2	1	5	300	8	0	6	5	0	31	10	3	56	0	0	0
8830	12542	23971	2	-1	7.0308	1	119	123	110	3	103	108		0	2		97	112	92	107	93	31.7073	24								1	1	2	2	1	5	300	8	0	6	5	0	31	10	3	56	0	0	0
8830	12378	23945			7.0308	1	119	123	110	3	103	108		0	3		97	112	92	107	93	31.7073	24
8831	12542	23971	2	-1	6.90486	0	84	84	88	2	110	100	6.5	0	1	175	91	72	91	93	100	21.9512	14	0	4	1	1	-12	-1.95122	2	1	1	2	2	1	5	300	8	0	6	5	0	31	10	3	56	0	0	0
8831	12542	23971	2	-1	6.90486	0	84	84	88	2	110	100	6.5	0	2	140	91	72	91	93	100	21.9512	14	9	-2	11	3	8	5	6	1	1	2	2	1	5	300	8	0	6	5	0	31	10	3	56	0	0	0
8831	12663	23971	3	0	6.90486	0	84	84	88	2	110	100	9	0	3	185	91	72	91	93	100	21.9512	14	-5	2	-6	-1	-4	-0.555556	-16	1	2	2	1	4	5	300	7	0	5	4	0	0	39	0	60	1	0	61
8832	12542	23971	2	-1	7.62491	0	99	111	86	3	109	105	16.5	0	1	175	117	107	112	118	111	31.7073	28	2	-1	11	-14	0	28.2927	0	1	1	2	2	1	5	300	8	0	6	5	0	31	10	3	56	0	0	0
8832	12542	23971	2	-1	7.62491	0	99	111	86	3	109	105	16.5	0	2	141	117	107	112	118	111	31.7073	28	-9	-5	-13	-1	-1	-44.0909	-6	1	1	2	2	1	5	300	8	0	6	5	0	31	10	3	56	0	0	0
8832	12663	23971	3	0	7.62491	0	99	111	86	3	109	105	8.5	0	3	184	117	107	112	118	111	31.7073	28	0	-4	-2	-1	3	37.4242	6	1	2	2	1	4	5	300	7	0	5	4	0	0	39	0	60	1	0	61
8833	12542	23971	2	-1	6.93771	1	116	107	120	1	130	121	4	0	1	175	121	119	120	115	107	17.0732	16	-12	0	-2	-23	-3	5.42683	12	1	1	2	2	1	5	300	8	0	6	5	0	31	10	3	56	0	0	0
8833	12542	23971	2	-1	6.93771	1	116	107	120	1	130	121	4	0	2	140	121	119	120	115	107	17.0732	16	-4	0	-9	8	-9	-8.86364	-10	1	1	2	2	1	5	300	8	0	6	5	0	31	10	3	56	0	0	0
8833	12663	23971	3	0	6.93771	1	116	107	120	1	130	121	8	0	3	196	121	119	120	115	107	17.0732	16	0	0	2	-4	7	15.2525	2	1	2	2	1	4	5	300	7	0	5	4	0	0	39	0	60	1	0	61
8834	12542	23971	2	-1	7.55099	0	109	105	110	3	103	116	3	0	1	175	102	99	102	100	101	29.2683	24	2	13	7	-4	-2	0.731707	2	1	1	2	2	1	5	300	8	0	6	5	0	31	10	3	56	0	0	0
8834	12542	23971	2	-1	7.55099	0	109	105	110	3	103	116	3	0	2	141	102	99	102	100	101	29.2683	24	1	-8	-1	4	1	-11.8182	-8	1	1	2	2	1	5	300	8	0	6	5	0	31	10	3	56	0	0	0
8834	12663	23971	3	0	7.55099	0	109	105	110	3	103	116	5	0	3	184	102	99	102	100	101	29.2683	24	-8	-3	-1	-16	-1	15.1515	-8	1	2	2	1	4	5	300	7	0	5	4	0	0	39	0	60	1	0	61
8835	12542	23971	2	-1	6.98152	1	118	116	114	4	103	108	7	0	1	175	109	105	115	102	88	9.7561	18	-6	-2	-5	-5	-3	2.7439	8	1	1	2	2	1	5	300	8	0	6	5	0	31	10	3	56	0	0	0
8835	12542	23971	2	-1	6.98152	1	118	116	114	4	103	108	7	0	2	140	109	105	115	102	88	9.7561	18	12	2	20	-1	-4	-3.40909	-4	1	1	2	2	1	5	300	8	0	6	5	0	31	10	3	56	0	0	0
8835	12663	23971	3	0	6.98152	1	118	116	114	4	103	108	13.5	0	3	185	109	105	115	102	88	9.7561	18	-17	0	-15	-15	2	19.798	2	1	2	2	1	4	5	300	7	0	5	4	0	0	39	0	60	1	0	61
8836	12544	23971	5	0	10.0479	0	116	126	101	6	107	102	11	0	1	175	95	102	100	91	91	8.33333	14	-7	1	-5	-15	10	6.43939	16	1	1	2	1	3	5	400	10	1	3	4	8	40	5	5	42	0	0	0
8836	12544	23971	5	0	10.0479	0	116	126	101	6	107	102	11	0	2	139	95	102	100	91	91	8.33333	14	7	-1	-1	22	-1	-3.98841	-14	1	1	2	1	3	5	400	10	1	3	4	8	40	5	5	42	0	0	0
8836	12664	23971	6	0	10.0479	0	116	126	101	6	107	102	15	0	3	186	95	102	100	91	91	8.33333	14	6	3	9	-4	6	0.555892	8	0	2	2	2	3	5	300	8	0	6	5	5	7	26	2	51	9	0	9
8837	12544	23971	5	0	10.6393	1	87	83	95	4	93	94	3	0	1	175	74	82	87	68	72	11.9048	12	-2	5	0	-3	-6	6.27706	0	1	1	2	1	3	5	400	10	1	3	4	8	40	5	5	42	0	0	0
8837	12544	23971	5	0	10.6393	1	87	83	95	4	93	94	3	0	2	140	74	82	87	68	72	11.9048	12	5	-5	-1	12	7	-5.43672	-6	1	1	2	1	3	5	400	10	1	3	4	8	40	5	5	42	0	0	0
8837	12664	23971	6	0	10.6393	1	87	83	95	4	93	94	7.5	0	3	185	74	82	87	68	72	11.9048	12	-1	8	-2	0	1	-1.40489	0	0	2	2	2	3	5	300	8	0	6	5	5	7	26	2	51	9	0	9
8838	12544	23971	5	0	10.0424	1	94	94	96	4	107	98	9	0	1	175	91	90	102	81	85	8.33333	10	3	-1	0	6	5	16.6667	8	1	1	2	1	3	5	400	10	1	3	4	8	40	5	5	42	0	0	0
8838	12544	23971	5	0	10.0424	1	94	94	96	4	107	98	9	0	2	139	91	90	102	81	85	8.33333	10	-1	4	0	1	-6	-16.1765	-8	1	1	2	1	3	5	400	10	1	3	4	8	40	5	5	42	0	0	0
8838	12664	23971	6	0	10.0424	1	94	94	96	4	107	98	6.5	0	3	186	91	90	102	81	85	8.33333	10	-12	5	-8	-22	8	3.5476	12	0	2	2	2	3	5	300	8	0	6	5	5	7	26	2	51	9	0	9
8839	12544	23971	5	0	10.1191	0	114	115	108	2	105	79	0.5	0	1	175	103	97	107	98	95	5.95238	24	10	5	9	10	6	6.54762	0	1	1	2	1	3	5	400	10	1	3	4	8	40	5	5	42	0	0	0
8839	12544	23971	5	0	10.1191	0	114	115	108	2	105	79	0.5	0	2	139	103	97	107	98	95	5.95238	24	-10	8	-4	-17	-2	15.9314	-4	1	1	2	1	3	5	400	10	1	3	4	8	40	5	5	42	0	0	0
8839	12664	23971	6	0	10.1191	0	114	115	108	2	105	79	8	0	3	186	103	97	107	98	95	5.95238	24	6	-3	3	13	-8	-25.3386	8	0	2	2	2	3	5	300	8	0	6	5	5	7	26	2	51	9	0	9
8840	12544	23971	5	0	9.9384	1	98	109	87	5	104	100	19	0	1	175	97	86	106	84	87	40.4762	20	12	6	3	26	10	0.4329	6	1	1	2	1	3	5	400	10	1	3	4	8	40	5	5	42	0	0	0
8840	12544	23971	5	0	9.9384	1	98	109	87	5	104	100	19	0	2	140	97	86	106	84	87	40.4762	20	-4	-3	-2	-4	-4	-13.4581	-10	1	1	2	1	3	5	400	10	1	3	4	8	40	5	5	42	0	0	0
8840	12664	23971	6	0	9.9384	1	98	109	87	5	104	100	17	0	3	185	97	86	106	84	87	40.4762	20	1	2	-3	3	7	-6.83242	14	0	2	2	2	3	5	300	8	0	6	5	5	7	26	2	51	9	0	9
8841	12544	23971	5	0	10.2642	1	99	111	86	4	91	89	5.5	0	1	175	94	87	99	90	91	28.5714	10	4	4	3	5	3	-1.2987	0	1	1	2	1	3	5	400	10	1	3	4	8	40	5	5	42	0	0	0
8841	12544	23971	5	0	10.2642	1	99	111	86	4	91	89	5.5	0	2	140	94	87	99	90	91	28.5714	10	1	0	1	1	3	-6.68449	-8	1	1	2	1	3	5	400	10	1	3	4	8	40	5	5	42	0	0	0
8841	12664	23971	6	0	10.2642	1	99	111	86	4	91	89	14	0	3	185	94	87	99	90	91	28.5714	10	-1	3	-3	0	-1	11.3705	18	0	2	2	2	3	5	300	8	0	6	5	5	7	26	2	51	9	0	9
8842	12544	23971	5	0	10.0589	0	86	70	106	3	95	92	5.5	0	1	175	100	98	105	95	95	23.8095	22	-1	2	-1	-1	0	-2.21861	6	1	1	2	1	3	5	400	10	1	3	4	8	40	5	5	42	0	0	0
8842	12544	23971	5	0	10.0589	0	86	70	106	3	95	92	5.5	0	2	158	100	98	105	95	95	23.8095	22	4	3	4	6	-2	-14.3744	-6	1	1	2	1	3	5	400	10	1	3	4	8	40	5	5	42	0	0	0
8842	13368	23971	6		10.0589	0	86	70	106	3	95	92	14	0	3		100	98	105	95	95	23.8095	22
8843	12544	23971	5	0	10.4969	1	102	104	98	4	95	102		0	1	186	112	105	113	113	93	36.9048	28	-1	4	-5	-1	12	-7.35931	4	1	1	2	1	3	5	400	10	1	3	4	8	40	5	5	42	0	0	0
8843	12544	23971	5	0	10.4969	1	102	104	98	4	95	102		0	2		112	105	113	113	93	36.9048	28								1	1	2	1	3	5	400	10	1	3	4	8	40	5	5	42	0	0	0
8843	12378	23945			10.4969	1	102	104	98	4	95	102		0	3		112	105	113	113	93	36.9048	28
8844	12544	23971	5	0	10.1054	0	74	78	77	2	95	91	24.5	0	1	175	69	61	72	77	74	8.33333	10	-4	8	6	-17	-4	0.757576	-4	1	1	2	1	3	5	400	10	1	3	4	8	40	5	5	42	0	0	0
8844	12544	23971	5	0	10.1054	0	74	78	77	2	95	91	24.5	0	2	157	69	61	72	77	74	8.33333	10	-7	2	-8	-8	5	12.5586	4	1	1	2	1	3	5	400	10	1	3	4	8	40	5	5	42	0	0	0
8844	13368	23971	6		10.1054	0	74	78	77	2	95	91	20.5	0	3		69	61	72	77	74	8.33333	10
8845	12544	23971	5	0	10.2423	0	87	88	89	2	104	92	23	0	1	175	87	71	94	83	85	0	14	-5	2	5	-16	-9	17.0455	-12	1	1	2	1	3	5	400	10	1	3	4	8	40	5	5	42	0	0	0
8845	12544	23971	5	0	10.2423	0	87	88	89	2	104	92	23	0	2	158	87	71	94	83	85	0	14	6	1	1	12	4	5.63496	14	1	1	2	1	3	5	400	10	1	3	4	8	40	5	5	42	0	0	0
8845	13368	23971	6		10.2423	0	87	88	89	2	104	92	17	0	3		87	71	94	83	85	0	14
8846	12544	23971	5	0	10.4175	0	100	113	87	9	118	108	0	0	1	175	93	91	98	85	98	34.5238	16	1	15	-3	6	3	-10.6602	4	1	1	2	1	3	5	400	10	1	3	4	8	40	5	5	42	0	0	0
8846	12544	23971	5	0	10.4175	0	100	113	87	9	118	108	0	0	2	139	93	91	98	85	98	34.5238	16	5	8	7	4	0	8.4893	-8	1	1	2	1	3	5	400	10	1	3	4	8	40	5	5	42	0	0	0
8846	12664	23971	6	0	10.4175	0	100	113	87	9	118	108	0	0	3	186	93	91	98	85	98	34.5238	16	4	-6	-4	10	7	2.69861	26	0	2	2	2	3	5	300	8	0	6	5	5	7	26	2	51	9	0	9
8847	12544	23971	5	0	9.70842	1	105	96	112	5	105	100	12.5	0	1	175	99	111	107	91	93	32.1429	18	0	-4	-6	9	-1	-4.87013	8	1	1	2	1	3	5	400	10	1	3	4	8	40	5	5	42	0	0	0
8847	12544	23971	5	0	9.70842	1	105	96	112	5	105	100	12.5	0	2	140	99	111	107	91	93	32.1429	18	3	7	14	-10	-3	-0.802139	-2	1	1	2	1	3	5	400	10	1	3	4	8	40	5	5	42	0	0	0
8847	12664	23971	6	0	9.70842	1	105	96	112	5	105	100	14	0	3	185	99	111	107	91	93	32.1429	18	1	13	-10	10	11	8.58096	-4	0	2	2	2	3	5	300	8	0	6	5	5	7	26	2	51	9	0	9
8848	12544	23971	5	0	10.0808	0	111	100	119	5	109	108	2	0	1	175	115	108	107	126	99	38.0952	22	-3	12	5	-18	7	25.5411	8	1	1	2	1	3	5	400	10	1	3	4	8	40	5	5	42	0	0	0
8848	12544	23971	5	0	10.0808	0	111	100	119	5	109	108	2	0	2	140	115	108	107	126	99	38.0952	22	8	-4	7	8	1	-30.303	4	1	1	2	1	3	5	400	10	1	3	4	8	40	5	5	42	0	0	0
8848	12664	23971	6	0	10.0808	0	111	100	119	5	109	108	5	0	3	185	115	108	107	126	99	38.0952	22	1	7	-6	6	6	6.87285	0	0	2	2	2	3	5	300	8	0	6	5	5	7	26	2	51	9	0	9
8849	12544	23971	5	0	10.2368	1	109	103	111	3	127	127	16.5	0	1	175	102	111	104	97	104	33.3333	12	5	-1	5	2	2	10.9848	8	1	1	2	1	3	5	400	10	1	3	4	8	40	5	5	42	0	0	0
8849	12544	23971	5	0	10.2368	1	109	103	111	3	127	127	16.5	0	2	139	102	111	104	97	104	33.3333	12					0	-18.828		1	1	2	1	3	5	400	10	1	3	4	8	40	5	5	42	0	0	0
8849	12664	23971	6	0	10.2368	1	109	103	111	3	127	127	28.5	0	3		102	111	104	97	104	33.3333	12								0	2	2	2	3	5	300	8	0	6	5	5	7	26	2	51	9	0	9
8850	12544	23971	5	0	9.88364	0	91	89	96	3	102	86	4	0	1	185	95	77	101	86	98	38.0952	20	2	8	2	2	1	-10.8225	4	1	1	2	1	3	5	400	10	1	3	4	8	40	5	5	42	0	0	0
8850	12544	23971	5	0	9.88364	0	91	89	96	3	102	86	4	0	2	130	95	77	101	86	98	38.0952	20	10	0	9	8	8	6.06061	-6	1	1	2	1	3	5	400	10	1	3	4	8	40	5	5	42	0	0	0
8850	12664	23971	6	0	9.88364	0	91	89	96	3	102	86	4.5	0	3	185	95	77	101	86	98	38.0952	20	2	-2	-2	6	-2	3.78007	8	0	2	2	2	3	5	300	8	0	6	5	5	7	26	2	51	9	0	9
8851	12544	23971	5	0	10.0808	1	96	94	99	4	77	83	1.5	0	1	185	88	95	98	81	84	10.7143	12	-2	1	-3	2	-5	-2.75974	8	1	1	2	1	3	5	400	10	1	3	4	8	40	5	5	42	0	0	0
8851	12544	23971	5	0	10.0808	1	96	94	99	4	77	83	1.5	0	2	148	88	95	98	81	84	10.7143	12	5	12	2	7	2	14.7259	-8	1	1	2	1	3	5	400	10	1	3	4	8	40	5	5	42	0	0	0
8851	13368	23971	6		10.0808	1	96	94	99	4	77	83	1.5	0	3		88	95	98	81	84	10.7143	12
8852	12545	23972	2	1	7.48255	1	113	110	112	4	116	126	12.5	0	1	172	100	108	97	101	102	14.6341	26	1	2	15	-13	-6	12.8659	-4	1	1	2	3	1	5	300		0	6	4	0	0	32	21	47	0	0	0
8852	12545	23972	2	1	7.48255	1	113	110	112	4	116	126	12.5	0	2	136	100	108	97	101	102	14.6341	26	-3	-4	-3	-4	1	-16.1364	-6	1	1	2	3	1	5	300		0	6	4	0	0	32	21	47	0	0	0
8852	12697	23972	3	-1	7.48255	1	113	110	112	4	116	126	12	0	3	200	100	108	97	101	102	14.6341	26	3	0	6	1	-3	17.5253	18	1	2						5	0	6	4	2	0	30	10	58	0	0	0
8853	12545	23972	2	1	7.37029	0	117	110	118	3	92	89	4	0	1	172	124	117	129	109	106	41.4634	18	-14	1	-5	-19	-8	-13.9634	8	1	1	2	3	1	5	300		0	6	4	0	0	32	21	47	0	0	0
8853	12545	23972	2	1	7.37029	0	117	110	118	3	92	89	4	0	2	136	124	117	129	109	106	41.4634	18	-1	1	-3	4	-11	-13.8636	-8	1	1	2	3	1	5	300		0	6	4	0	0	32	21	47	0	0	0
8853	12697	23972	3	-1	7.37029	0	117	110	118	3	92	89	4	0	3	200	124	117	129	109	106	41.4634	18	6	-6	0	12	5	17.4747	14	1	2						5	0	6	4	2	0	30	10	58	0	0	0
8854	12545	23972	2	1	6.80082	1	99	96	101	3	98	92	5.5	0	1	172	100	100	86	116	116	12.1951	18	3	1	20	-16	-25	7.80488	0	1	1	2	3	1	5	300		0	6	4	0	0	32	21	47	0	0	0
8854	12545	23972	2	1	6.80082	1	99	96	101	3	98	92	5.5	0	2	137	100	100	86	116	116	12.1951	18	-3	-2	-5	3	-4	-8.63636	-4	1	1	2	3	1	5	300		0	6	4	0	0	32	21	47	0	0	0
8854	12697	23972	3	-1	6.80082	1	99	96	101	3	98	92	4	0	3	199	100	100	86	116	116	12.1951	18	6	-4	9	-1	2	1.9697	16	1	2						5	0	6	4	2	0	30	10	58	0	0	0
8855	12545	23972	2	1	7.47433	1	102	91	112	2	87	92	13	0	1	172	91	111	91	97	81	17.0732	16	5	1	8	1	-2	-7.07317	6	1	1	2	3	1	5	300		0	6	4	0	0	32	21	47	0	0	0
8855	12545	23972	2	1	7.47433	1	102	91	112	2	87	92	13	0	2	136	91	111	91	97	81	17.0732	16	-7	-3	3	-19	-3	3.63636	-6	1	1	2	3	1	5	300		0	6	4	0	0	32	21	47	0	0	0
8855	12697	23972	3	-1	7.47433	1	102	91	112	2	87	92	25	0	3	200	91	111	91	97	81	17.0732	16	4	-5	-1	6	9	8.58586	10	1	2						5	0	6	4	2	0	30	10	58	0	0	0
8856	12546	23972	5	-1	10.4887	0	87	120	57	6	105	118	12.5	0	1	185	100	77	95	102	112	42.0455	8	14	19	11	6	17	7.95455	24	1	1	2	2	2	5	300	8	0	5	4	0	31	19	3	47	0	0	8
8856	12546	23972	5	-1	10.4887	0	87	120	57	6	105	118	12.5	0	2	128	100	77	95	102	112	42.0455	8	3	7	10	-3	-11	-15.9794	-18	1	1	2	2	2	5	300	8	0	5	4	0	31	19	3	47	0	0	8
8856	12547	23972	6	0	10.4887	0	87	120	57	6	105	118	0.5	0	3	201	100	77	95	102	112	42.0455	8	6	-3	-5	14	11	-20.2951	20	0	2	2	2	2	5	400	5
8857	12546	23972	5	-1	9.80151	0	106	102	107	3	79	84	9	0	1	185	94	78	109	79	85		18	-1	3	-8	3	13		-4	1	1	2	2	2	5	300	8	0	5	4	0	31	19	3	47	0	0	8
8857	12546	23972	5	-1	9.80151	0	106	102	107	3	79	84	9	0	2	130	94	78	109	79	85		18	-6	-3	2	-3	-32	-1.91458	-10	1	1	2	2	2	5	300	8	0	5	4	0	31	19	3	47	0	0	8
8857	12547	23972	6	0	9.80151	0	106	102	107	3	79	84	9	0	3	199	94	78	109	79	85		18	5	-1	-3	7	22	-1.58682	6	0	2	2	2	2	5	400	5
8858	12546	23972	5	-1	10.3847	1	113	111	111	4	105	110	8	0	1	185	86	86	93	81	86	19.3182	12	2	4	11	-11	1	11.6342	6	1	1	2	2	2	5	300	8	0	5	4	0	31	19	3	47	0	0	8
8858	12546	23972	5	-1	10.3847	1	113	111	111	4	105	110	8	0	2	129	86	86	93	81	86	19.3182	12	1	1	-6	12	-4	-17.5503	-14	1	1	2	2	2	5	300	8	0	5	4	0	31	19	3	47	0	0	8
8858	12547	23972	6	0	10.3847	1	113	111	111	4	105	110	9.5	0	3	200	86	86	93	81	86	19.3182	12	2	11	0	3	5	7.18617	14	0	2	2	2	2	5	400	5
8859	12546	23972	5	-1	9.98494	1	104	102	105	4	102	98	5.5	0	1	185	91	113	96	81	106	18.1818	12	2	-11	6	-5	1	-13.4199	6	1	1	2	2	2	5	300	8	0	5	4	0	31	19	3	47	0	0	8
8859	12546	23972	5	-1	9.98494	1	104	102	105	4	102	98	5.5	0	2	130	91	113	96	81	106	18.1818	12	-1	18	-2	5	-9	23.0731	-14	1	1	2	2	2	5	300	8	0	5	4	0	31	19	3	47	0	0	8
8859	12547	23972	6	0	9.98494	1	104	102	105	4	102	98	5	0	3	199	91	113	96	81	106	18.1818	12	-4	-5	-8	0	4	2.55711	8	0	2	2	2	2	5	400	5
8860	12495	23951	2	1	6.94319	1	125	129	113	3	108	116	10.5	1	1	169	125	112	126	118	102	34.1463	32	-5	2	-5	-6	2	13.3537	-2	0	1	2	1	4	5	280	6	1	5	4	7	91	0	2	0	0	0	23
8860	12495	23951	2	1	6.94319	1	125	129	113	3	108	116	10.5	1	2	157	125	112	126	118	102	34.1463	32	2	1	6	-2	-9	-27.0455	-6	0	1	2	1	4	5	280	6	1	5	4	7	91	0	2	0	0	0	23
8860	12617	23951	3	1	6.94319	1	125	129	113	3	108	116	5.5	1	3	188	125	112	126	118	102	34.1463	32	-12	-2	-8	-14	2	12.8788	12	0	2	3	2	3	5	300	6	1	2	5	8	39	2	9	42	0	0	10
8861	12495	23951	2	1	7.1321	0	121	108	128	4	92	110	4	1	1	169	108	90	105	109	100	12.1951	26	15	14	20	9	-10	20.3049	4	0	1	2	1	4	5	280	6	1	5	4	7	91	0	2	0	0	0	23
8861	12495	23951	2	1	7.1321	0	121	108	128	4	92	110	4	1	2	156	108	90	105	109	100	12.1951	26	-22	3	-4	-40	0	-12.5	-8	0	1	2	1	4	5	280	6	1	5	4	7	91	0	2	0	0	0	23
8861	12616	23951	3	0	7.1321	0	121	108	128	4	92	110	2	1	3	189	108	90	105	109	100	12.1951	26	5	0	-7	19	-4	-4.09091	14	1	2	2	4	3	5	300	8	1	2	5	0	50	6	0	44	0	0	35
8862	12495	23951	2	1	7.46886	0	110	114	102	6	107	101	5.5	1	1	169	117	85	121	101	109	39.0244	28	1	12	1	6	-10	5.97561	2	0	1	2	1	4	5	280	6	1	5	4	7	91	0	2	0	0	0	23
8862	12495	23951	2	1	7.46886	0	110	114	102	6	107	101	5.5	1	2	156	117	85	121	101	109	39.0244	28	-9	2	-8	-7	2	-20.5556	-12	0	1	2	1	4	5	280	6	1	5	4	7	91	0	2	0	0	0	23
8862	12616	23951	3	0	7.46886	0	110	114	102	6	107	101	12	1	3	189	117	85	121	101	109	39.0244	28	6	1	1	9	3	5.10101	16	1	2	2	4	3	5	300	8	1	2	5	0	50	6	0	44	0	0	35
8863	12495	23951	2	1	7.62491	0	128	114	134	4	97	105	12	1	1	169	118	122	119	113	96	19.5122	30	5	-2	13	-4	-3	25.4878	2	0	1	2	1	4	5	280	6	1	5	4	7	91	0	2	0	0	0	23
8863	12495	23951	2	1	7.62491	0	128	114	134	4	97	105	12	1	2	158	118	122	119	113	96	19.5122	30	-7	2	-8	1	-13	-11.6667	-14	0	1	2	1	4	5	280	6	1	5	4	7	91	0	2	0	0	0	23
8863	12616	23951	3	0	7.62491	0	128	114	134	4	97	105	8.5	1	3	187	118	122	119	113	96	19.5122	30	-4	-2	-4	-8	8	-17.4242	16	1	2	2	4	3	5	300	8	1	2	5	0	50	6	0	44	0	0	35
8864	12495	23951	2	1	7.49076	0	99	102	95	2	87	84	12	1	1	169	101	71	106	100	81	9.7561	16	6	11	6	1	10	22.7439	8	0	1	2	1	4	5	280	6	1	5	4	7	91	0	2	0	0	0	23
8864	12495	23951	2	1	7.49076	0	99	102	95	2	87	84	12	1	2	156	101	71	106	100	81	9.7561	16	-5	1	-4	-5	2	-27.9545	-6	0	1	2	1	4	5	280	6	1	5	4	7	91	0	2	0	0	0	23
8864	12496	23951	3	0	7.49076	0	99	102	95	2	87	84	10	1	3	189	101	71	106	100	81	9.7561	16	-1	8	-1	0	3	22.1212	12	1	2	2	1	4	5	275	8
8865	12495	23951	2	1	7.40589	1	117	112	117	5	107	111	9	1	1	169	109	100	110	101	106	26.8293	30	-1	-2	7	-8	-3	10.6707	-2	0	1	2	1	4	5	280	6	1	5	4	7	91	0	2	0	0	0	23
8865	12495	23951	2	1	7.40589	1	117	112	117	5	107	111	9	1	2	157	109	100	110	101	106	26.8293	30	-2	2	6	-14	4	0.277778	-6	0	1	2	1	4	5	280	6	1	5	4	7	91	0	2	0	0	0	23
8865	12616	23951	3	0	7.40589	1	117	112	117	5	107	111	1	1	3	188	109	100	110	101	106	26.8293	30	2	-5	-9	19	-6	-8.23232	14	1	2	2	4	3	5	300	8	1	2	5	0	50	6	0	44	0	0	35
8866	12494	23951	2	0	6.94593	0	119	126	106	3	100	100	3	1	1	169	143	110	141	128	122	12.5	34	-17	6	-20	-2	-15	36.2805	2	1	1	2	1	3	5	300	8	1	7	5	11	32	0	3	54	0	0	0
8866	12494	23951	2	0	6.94593	0	119	126	106	3	100	100	3	1	2	157	143	110	141	128	122	12.5	34	4	-5	20	-21	-3	-23.7805	-6	1	1	2	1	3	5	300	8	1	7	5	11	32	0	3	54	0	0	0
8866	12617	23951	3	1	6.94593	0	119	126	106	3	100	100	2	1	3	188	143	110	141	128	122	12.5	34	-6	0	-15	8	0	26.1111	2	0	2	3	2	3	5	300	6	1	2	5	8	39	2	9	42	0	0	10
8867	12494	23951	2	0	7.57837	1	121	121	115	4	111	113	3	1	1	169	120	117	122	113	95	30	36	-6	-2	5	-18	-7	-12.9268	-8	1	1	2	1	3	5	300	8	1	7	5	11	32	0	3	54	0	0	0
8867	12494	23951	2	0	7.57837	1	121	121	115	4	111	113	3	1	2	158	120	117	122	113	95	30	36	-1	4	-4	3	7	-1.16408	-2	1	1	2	1	3	5	300	8	1	7	5	11	32	0	3	54	0	0	0
8867	12617	23951	3	1	7.57837	1	121	121	115	4	111	113	10.5	1	3	187	120	117	122	113	95	30	36	9	2	-5	26	8	24.0909	14	0	2	3	2	3	5	300	6	1	2	5	8	39	2	9	42	0	0	10
8868	12494	23951	2	0	7.23614	1	101	94	107	2	124	118	29	1	1	169	93	87	93	100	76	7.5	14	-2	8	5	-13	6	-5.06098	6	1	1	2	1	3	5	300	8	1	7	5	11	32	0	3	54	0	0	0
8868	12494	23951	2	0	7.23614	1	101	94	107	2	124	118	29	1	2	157	93	87	93	100	76	7.5	14	3	-4	6	-1	0	-0.216802	2	1	1	2	1	3	5	300	8	1	7	5	11	32	0	3	54	0	0	0
8868	12616	23951	3	0	7.23614	1	101	94	107	2	124	118	21.5	1	3	188	93	87	93	100	76	7.5	14	-8	2	-7	-8	-4	2.32323	-4	1	2	2	4	3	5	300	8	1	2	5	0	50	6	0	44	0	0	35
8869	12494	23951	2	0	7.66051	0	93	82	105	4	109	96	5	1	1	169	91	78	93	93	84	15	14	-5	7	3	-13	-8	4.5122	4	1	1	2	1	3	5	300	8	1	7	5	11	32	0	3	54	0	0	0
8869	12494	23951	2	0	7.66051	0	93	82	105	4	109	96	5	1	2	178	91	78	93	93	84	15	14	-4	-5	-13	4	16	-8.40108	-6	1	1	2	1	3	5	300	8	1	7	5	11	32	0	3	54	0	0	0
8869	12637	23961	3	-1	7.66051	0	93	82	105	4	109	96	6.5	1	3	174	91	78	93	93	84	15	14	16	19	23	7	-3	2.52525	10	1	2	2	1	1	5	300	9	1	6	4	5	61	0	0	28	6	0	38
8870	12494	23951	2	0	7.09103	1	90	110	72	2	119	105	4	1	1	169	97	97	90	115	85	17.5	18	2	1	5	-7	15	16.6463	-2	1	1	2	1	3	5	300	8	1	7	5	11	32	0	3	54	0	0	0
8870	12494	23951	2	0	7.09103	1	90	110	72	2	119	105	4	1	2	157	97	97	90	115	85	17.5	18	-15	-5	-8	-24	-16	-29.6009	-4	1	1	2	1	3	5	300	8	1	7	5	11	32	0	3	54	0	0	0
8870	12617	23951	3	1	7.09103	1	90	110	72	2	119	105	2.5	1	3	188	97	97	90	115	85	17.5	18	12	-3	9	14	10	37.6768	8	0	2	3	2	3	5	300	6	1	2	5	8	39	2	9	42	0	0	10
8871	12494	23951	2	0	7.16769	1	103	108	97	3	106	110	7.5	1	1	169	87	101	86	97	76	12.5	16	6	2	10	-4	8	-5.18293	2	1	1	2	1	3	5	300	8	1	7	5	11	32	0	3	54	0	0	0
8871	12494	23951	2	0	7.16769	1	103	108	97	3	106	110	7.5	1	2	175	87	101	86	97	76	12.5	16	-3	-4	2	-10	1	-5.04435	-4	1	1	2	1	3	5	300	8	1	7	5	11	32	0	3	54	0	0	0
8871	12504	23954	3	1	7.16769	1	103	108	97	3	106	110	7	1	3	175	87	101	86	97	76	12.5	16	-1	3	-6	2	10	31.0606	4	1	2	2	2	3	5	300	8	1	5	4	5	61	31	0	3	0	0	0
8872	12494	23951	2	0	7.51814	0	107	94	117	3	83	90	3.5	1	1	169	80	72	90	75	80	17.5	22	-1	-5	-1	-3	-6	23.9634	8	1	1	2	1	3	5	300	8	1	7	5	11	32	0	3	54	0	0	0
8872	12494	23951	2	0	7.51814	0	107	94	117	3	83	90	3.5	1	2	158	80	72	90	75	80	17.5	22	7	-5	-1	20	-1	-30.0998	-16	1	1	2	1	3	5	300	8	1	7	5	11	32	0	3	54	0	0	0
8872	12617	23951	3	1	7.51814	0	107	94	117	3	83	90	5.5	1	3	187	80	72	90	75	80	17.5	22	-7	10	-5	-12	11	17.5253	22	0	2	3	2	3	5	300	6	1	2	5	8	39	2	9	42	0	0	10
8873	12494	23951	2	0	7.5948	1	119	114	118	2	78	82	7.5	1	1	169	89	90	89	98	70	7.5	26	0	-1	8	-12	2	-0.182927	-6	1	1	2	1	3	5	300	8	1	7	5	11	32	0	3	54	0	0	0
8873	12494	23951	2	0	7.5948	1	119	114	118	2	78	82	7.5	1	2	158	89	90	89	98	70	7.5	26	-9	-1	-16	3	-3	8.23848	-4	1	1	2	1	3	5	300	8	1	7	5	11	32	0	3	54	0	0	0
8873	12616	23951	3	0	7.5948	1	119	114	118	2	78	82	18.5	1	3	187	89	90	89	98	70	7.5	26	3	3	13	-15	10	-1.91919	8	1	2	2	4	3	5	300	8	1	2	5	0	50	6	0	44	0	0	35
8874	12494	23951	2	0	7.4141	0	102	79	124	2	98	85	3	1	1	205	89	73	88	92	95	17.5	16	3	5	8	-8	7	16.6463	2	1	1	2	1	3	5	300	8	1	7	5	11	32	0	3	54	0	0	0
8874	12494	23951	2	0	7.4141	0	102	79	124	2	98	85	3	1	2	121	89	73	88	92	95	17.5	16	1	-10	6	0	-15		-4	1	1	2	1	3	5	300	8	1	7	5	11	32	0	3	54	0	0	0
8874	12616	23951	3	0	7.4141	0	102	79	124	2	98	85	10	1	3	188	89	73	88	92	95	17.5	16	1	17	3	-3	8		14	1	2	2	4	3	5	300	8	1	2	5	0	50	6	0	44	0	0	35
8875	12494	23951	2	0	7.6167	1	105	102	106	6	116	116	6.5	1	1	169	112	117	119	98	101	30	20	-12	-3	-11	-7	-6	-12.9268	4	1	1	2	1	3	5	300	8	1	7	5	11	32	0	3	54	0	0	0
8875	12494	23951	2	0	7.6167	1	105	102	106	6	116	116	6.5	1	2	158	112	117	119	98	101	30	20	5	-3	4	6	-4	-3.73984	-4	1	1	2	1	3	5	300	8	1	7	5	11	32	0	3	54	0	0	0
8875	12616	23951	3	0	7.6167	1	105	102	106	6	116	116	3.5	1	3	187	112	117	119	98	101	30	20	-9	2	-12	-6	6	9.39394	6	1	2	2	4	3	5	300	8	1	2	5	0	50	6	0	44	0	0	35
8876	12494	23951	2	0	7.03901	0	119	110	123	2	85	93	5	1	1	169	108	82	109	104	103	12.5	16	-2	8	-3	6	-14	-7.62195	6	1	1	2	1	3	5	300	8	1	7	5	11	32	0	3	54	0	0	0
8876	12494	23951	2	0	7.03901	0	119	110	123	2	85	93	5	1	2	157	108	82	109	104	103	12.5	16	-11	-8	-19	2	3	4.21286	-10	1	1	2	1	3	5	300	8	1	7	5	11	32	0	3	54	0	0	0
8876	12496	23951	3	0	7.03901	0	119	110	123	2	85	93	3	1	3	188	108	82	109	104	103	12.5	16	8	10	23	-14	-9	24.2424	18	1	2	2	1	4	5	275	8
8877	12494	23951	2	0	7.59754	1	98	97	99	2	109	105	4	1	1	169	81	85	83	85	86	15	10	5	6	11	-4	-6	-5.2439	6	1	1	2	1	3	5	300	8	1	7	5	11	32	0	3	54	0	0	0
8877	12494	23951	2	0	7.59754	1	98	97	99	2	109	105	4	1	2	158	81	85	83	85	86	15	10	8	-3	1	16	4	6.15299	0	1	1	2	1	3	5	300	8	1	7	5	11	32	0	3	54	0	0	0
8877	12496	23951	3	0	7.59754	1	98	97	99	2	109	105	13	1	3	187	81	85	83	85	86	15	10	-13	4	-4	-18	-18	18.1818	12	1	2	2	1	4	5	275	8
8878	12494	23951	2	0	7.58932	0	107	94	117	2	84	90	8.5	1	1	169	89	76	92	94	75	10	14	11	16	13	7	5	31.4634	10	1	1	2	1	3	5	300	8	1	7	5	11	32	0	3	54	0	0	0
8878	12494	23951	2	0	7.58932	0	107	94	117	2	84	90	8.5	1	2	159	89	76	92	94	75	10	14	-4	-6	0	-12	2	-28.1301	-6	1	1	2	1	3	5	300	8	1	7	5	11	32	0	3	54	0	0	0
8878	12616	23951	3	0	7.58932	0	107	94	117	2	84	90	6.5	1	3	186	89	76	92	94	75	10	14	2	5	6	2	-7	0.30303	10	1	2	2	4	3	5	300	8	1	2	5	0	50	6	0	44	0	0	35
8879	12494	23951	2	0	7.12936	1	116	119	107	3	110	124	0	1	1	166	99	113	97	102	96	20	18	11	-1	18	-4	6	6.82927	6	1	1	2	1	3	5	300	8	1	7	5	11	32	0	3	54	0	0	0
8879	12494	23951	2	0	7.12936	1	116	119	107	3	110	124	0	1	2	156	99	113	97	102	96	20	18	9	-2	9	12	-7	-1.82927	4	1	1	2	1	3	5	300	8	1	7	5	11	32	0	3	54	0	0	0
8879	12496	23951	3	0	7.12936	1	116	119	107	3	110	124	0	1	3	189	99	113	97	102	96	20	18	-8	0	-2	-17	4	10.5556	8	1	2	2	1	4	5	275	8
8880	12494	23951	2	0	6.80903	0	106	102	108	1	95	97	9	1	1	169	93	90	91	98	100	5	14	2	2	4	0	-7	7.19512	-4	1	1	2	1	3	5	300	8	1	7	5	11	32	0	3	54	0	0	0
8880	12494	23951	2	0	6.80903	0	106	102	108	1	95	97	9	1	2	157	93	90	91	98	100	5	14	-5	-6	-7	-1	-4	1.13821	4	1	1	2	1	3	5	300	8	1	7	5	11	32	0	3	54	0	0	0
8880	12616	23951	3	0	6.80903	0	106	102	108	1	95	97	10	1	3	188	93	90	91	98	100	5	14	-7	8	-6	-12	14	-1.9697	-4	1	2	2	4	3	5	300	8	1	2	5	0	50	6	0	44	0	0	35
8881	12494	23951	2	0	6.99521	0	109	107	108	3	100	106	11	1	1	169	112	107	107	117	101	35	18	4	-1	9	-7	0	4.02439	4	1	1	2	1	3	5	300	8	1	7	5	11	32	0	3	54	0	0	0
8881	12494	23951	2	0	6.99521	0	109	107	108	3	100	106	11	1	2	157	112	107	107	117	101	35	18	-2	5	5	-6	-11	-36.7517	2	1	1	2	1	3	5	300	8	1	7	5	11	32	0	3	54	0	0	0
8881	12496	23951	3	0	6.99521	0	109	107	108	3	100	106	5	1	3	188	112	107	107	117	101	35	18	2	-7	-1	3	7	48.8384	8	1	2	2	1	4	5	275	8
8883	12496	23951	2	1	6.68036	1	125	135	108	4	111	104	7	1	1	171	132	120	126	128	122	30	22	10	0	11	9	-8	-12.9268	18	1	1	2	1	4	5	300	6	1	5	5	0	12	0	4	84	0	0	80
8883	12496	23951	2	1	6.68036	1	125	135	108	4	111	104	7	1	2	155	132	120	126	128	122	30	22	-3	-3	-5	0	-4	9.5935	-14	1	1	2	1	4	5	300	6	1	5	5	0	12	0	4	84	0	0	80
8883	12616	23951	3	0	6.68036	1	125	135	108	4	111	104	6.5	1	3	188	132	120	126	128	122	30	22	-8	5	4	-24	-2	16.5152	4	1	2	2	4	3	5	300	8	1	2	5	0	50	6	0	44	0	0	35
8884	12496	23951	2	1	7.22519	1	107	105	107	3	92	99	7.5	1	1	171	96	82	94	102	91	17.5	16	-9	4	-9	-5	-9	-15.061	12	1	1	2	1	4	5	300	6	1	5	5	0	12	0	4	84	0	0	80
8884	12496	23951	2	1	7.22519	1	107	105	107	3	92	99	7.5	1	2	155	96	82	94	102	91	17.5	16	1	-3	3	-2	-3	22.561	-18	1	1	2	1	4	5	300	6	1	5	5	0	12	0	4	84	0	0	80
8884	12496	23951	3	0	7.22519	1	107	105	107	3	92	99	7	1	3	188	96	82	94	102	91	17.5	16	6	12	10	-3	8	25	8	1	2	2	1	4	5	275	8
8885	12496	23951	2	1	7.60849	0	114	111	112	4	97	105	11	1	1	171	121	98	125	108	105	42.5	38	-7	0	-17	10	3	-8.35366	-2	1	1	2	1	4	5	300	6	1	5	5	0	12	0	4	84	0	0	80
8885	12496	23951	2	1	7.60849	0	114	111	112	4	97	105	11	1	2	156	121	98	125	108	105	42.5	38	5	1	11	-8	0	15.8537	2	1	1	2	1	4	5	300	6	1	5	5	0	12	0	4	84	0	0	80
8885	12496	23951	3	0	7.60849	0	114	111	112	4	97	105	9.5	1	3	187	121	98	125	108	105	42.5	38	-1	-5	-6	10	-3	4.54545	-2	1	2	2	1	4	5	275	8
8886	12496	23951	2	1	7.34839	1	93	82	105	2	109	106	2.5	1	1	171	93	103	95	94	92	15	22	17	1	20	10	-1	-0.365854	0	1	1	2	1	4	5	300	6	1	5	5	0	12	0	4	84	0	0	80
8886	12496	23951	2	1	7.34839	1	93	82	105	2	109	106	2.5	1	2	154	93	103	95	94	92	15	22	-19	-6	-20	-11	-16	7.58808	-2	1	1	2	1	4	5	300	6	1	5	5	0	12	0	4	84	0	0	80
8886	12616	23951	3	0	7.34839	1	93	82	105	2	109	106	4.5	1	3	189	93	103	95	94	92	15	22	1	0	7	-7	2	-6.31313	12	1	2	2	4	3	5	300	8	1	2	5	0	50	6	0	44	0	0	35
8887	12496	23951	2	1	6.75975	1	108	107	106	2	103	108	6	1	1	171	102	109	98	105	110	22.5	10	8	0	12	6	-17	-20.061	20	1	1	2	1	4	5	300	6	1	5	5	0	12	0	4	84	0	0	80
8887	12496	23951	2	1	6.75975	1	108	107	106	2	103	108	6	1	2	155	102	109	98	105	110	22.5	10	-3	-4	4	-9	-9	10.8943	-14	1	1	2	1	4	5	300	6	1	5	5	0	12	0	4	84	0	0	80
8887	12616	23951	3	0	6.75975	1	108	107	106	2	103	108	2	1	3	188	102	109	98	105	110	22.5	10	-13	0	-15	-12	3	0.30303	12	1	2	2	4	3	5	300	8	1	2	5	0	50	6	0	44	0	0	35
8888	12496	23951	2	1	6.86927	0	116	110	117	2	116	108	8	1	1	171	118	98	116	109	120	27.5	28	3	8	10	0	-21	11.5244	8	1	1	2	1	4	5	300	6	1	5	5	0	12	0	4	84	0	0	80
8888	12496	23951	2	1	6.86927	0	116	110	117	2	116	108	8	1	2	155	118	98	116	109	120	27.5	28	3	2	-4	11	6	-9.47894	-14	1	1	2	1	4	5	300	6	1	5	5	0	12	0	4	84	0	0	80
8888	12496	23951	3	0	6.86927	0	116	110	117	2	116	108	5	1	3	188	118	98	116	109	120	27.5	28	7	3	-2	17	4	-2.87879	6	1	2	2	1	4	5	275	8
8889	12496	23951	2	1	7.35934	1	111	108	111	4	111	113	2	1	1	171	104	111	105	109	83	15	28	12	-1	19	-1	-1	-7.68293	-6	1	1	2	1	4	5	300	6	1	5	5	0	12	0	4	84	0	0	80
8889	12496	23951	2	1	7.35934	1	111	108	111	4	111	113	2	1	2	154	104	111	105	109	83	15	28	-12	2	-15	-7	5	15.4102	0	1	1	2	1	4	5	300	6	1	5	5	0	12	0	4	84	0	0	80
8889	12496	23951	3	0	7.35934	1	111	108	111	4	111	113	9.5	1	3	189	104	111	105	109	83	15	28	1	-2	0	5	-6	17.2727	6	1	2	2	1	4	5	275	8
8890	12497	23951	5	-1	10.4668	0	102	109	93	4	118	108	4	1	1	171	99	93	104	91	103	25	14	-4	6	-11	6	-2	34.5238	6	0	1	2	1	4	5	300	10	0	4	3	24	4	0	2	60	10	0	0
8890	12497	23951	5	-1	10.4668	0	102	109	93	4	118	108	4	1	2	154	99	93	104	91	103	25	14	12	-5	15	12	-8	-51.6807	2	0	1	2	1	4	5	300	10	0	4	3	24	4	0	2	60	10	0	0
8890	12618	23951	6	0	10.4668	0	102	109	93	4	118	108	5.5	1	3	189	99	93	104	91	103	25	14	1	5	1	-11	19	27.2084	10	1	2	2	2	4	5	300	7	0	6	4	0	0	54	6	29	11	0	20
8891	12497	23951	5	-1	10.1684	1	97	85	110	3	135	108	4.5	1	1	171	85	100	89	83	94	17.0455	10	2	4	8	-4	-7	13.9069	16	0	1	2	1	4	5	300	10	0	4	3	24	4	0	2	60	10	0	0
8891	12497	23951	5	-1	10.1684	1	97	85	110	3	135	108	4.5	1	2	154	85	100	89	83	94	17.0455	10	3	1	-2	8	5	-4.48179	-12	0	1	2	1	4	5	300	10	0	4	3	24	4	0	2	60	10	0	0
8891	12618	23951	6	0	10.1684	1	97	85	110	3	135	108	11	1	3	189	85	100	89	83	94	17.0455	10	4	6	2	6	1	1.36446	4	1	2	2	2	4	5	300	7	0	6	4	0	0	54	6	29	11	0	20
8892	12497	23951	5	-1	10.3682	1	90	74	108	3	76	81	11.5	1	1	171	95	99	100	88	99	23.8636	14	6	-1	2	10	2	16.6126	12	0	1	2	1	4	5	300	10	0	4	3	24	4	0	2	60	10	0	0
8892	12497	23951	5	-1	10.3682	1	90	74	108	3	76	81	11.5	1	2	154	95	99	100	88	99	23.8636	14	-3	4	-2	-2	-2	-8.12325	-10	0	1	2	1	4	5	300	10	0	4	3	24	4	0	2	60	10	0	0
8892	12618	23951	6	0	10.3682	1	90	74	108	3	76	81	8.5	1	3	189	95	99	100	88	99	23.8636	14	0	4	0	-4	8	-5.54882	4	1	2	2	2	4	5	300	7	0	6	4	0	0	54	6	29	11	0	20
8893	12497	23951	5	-1	10.3765	0	124	124	117	4	104	110	16.5	1	1	168	119	116	120	114	104	28.4091	20	-9	8	-7	-12	3	28.7338	14	0	1	2	1	4	5	300	10	0	4	3	24	4	0	2	60	10	0	0
8893	12497	23951	5	-1	10.3765	0	124	124	117	4	104	110	16.5	1	2	154	119	116	120	114	104	28.4091	20	8	-4	8	4	1	-24.7899	0	0	1	2	1	4	5	300	10	0	4	3	24	4	0	2	60	10	0	0
8893	12618	23951	6	0	10.3765	0	124	124	117	4	104	110	8.5	1	3	189	119	116	120	114	104	28.4091	20	5	12	6	0	4	18.1625	6	1	2	2	2	4	5	300	7	0	6	4	0	0	54	6	29	11	0	20
8894	12499	23952	2	-1	6.93498	1	87	81	96	3	116	124	4	1	1	181	114	112	108	118	107	30	26	-14	-2	-5	-21	-10	-5.60976	-8	1	1	2	2	4	5	300	7	0	6	4	0	6	34	4	56	0	0	0
8894	12499	23952	2	-1	6.93498	1	87	81	96	3	116	124	4	1	2	149	114	112	108	118	107	30	26	8	2	2	13	3	-17.5721	-2	1	1	2	2	4	5	300	7	0	6	4	0	6	34	4	56	0	0	0
8894	12619	23952	3	0	6.93498	1	87	81	96	3	116	124	3	1	3	203	114	112	108	118	107	30	26	10	-3	14	-1	6	13.1818	6	1	2	2	2	4	5	300	7	1	6	4	0	60	0	7	33	0	0	33
8895	12499	23952	2	-1	7.46064	1	86	79	97	0	76	60	33	1	1	173	56	52	72	51	62	5	10	-9	10	2	-28	-3	-2.56098	10	1	1	2	2	4	5	300	7	0	6	4	0	6	34	4	56	0	0	0
8895	12499	23952	2	-1	7.46064	1	86	79	97	0	76	60	33	1	2	148	56	52	72	51	62	5	10	7	-1	1	12	4	-2.43902	-14	1	1	2	2	4	5	300	7	0	6	4	0	6	34	4	56	0	0	0
8895	12619	23952	3	0	7.46064	1	86	79	97	0	76	60	23.5	1	3	204	56	52	72	51	62	5	10	18	5	0	46	4	0	4	1	2	2	2	4	5	300	7	1	6	4	0	60	0	7	33	0	0	33
8896	12499	23952	2	-1	6.81451	0	83	84	87	2	116	101	7	1	1	205	85	105	85	93	80	7.5	12	0	4	5	-7	0	7.13415	8	1	1	2	2	4	5	300	7	0	6	4	0	6	34	4	56	0	0	0
8896	12499	23952	2	-1	6.81451	0	83	84	87	2	116	101	7	1	2	125	85	105	85	93	80	7.5	12	6	-3	-2	16	7		-8	1	1	2	2	4	5	300	7	0	6	4	0	6	34	4	56	0	0	0
8896	12619	23952	3	0	6.81451	0	83	84	87	2	116	101	15	1	3	203	85	105	85	93	80	7.5	12	4	-2	8	-4	-1		0	1	2	2	2	4	5	300	7	1	6	4	0	60	0	7	33	0	0	33
8897	12499	23952	2	-1	7.0527	0	86	87	88	2	100	92	5.5	1	1	205	78	60	87	77	77	10	12	1	9	0	1	4		20	1	1	2	2	4	5	300	7	0	6	4	0	6	34	4	56	0	0	0
8897	12499	23952	2	-1	7.0527	0	86	87	88	2	100	92	5.5	1	2	125	78	60	87	77	77	10	12	11	-1	6	11	11		-22	1	1	2	2	4	5	300	7	0	6	4	0	6	34	4	56	0	0	0
8897	12619	23952	3	0	7.0527	0	86	87	88	2	100	92	3	1	3	203	78	60	87	77	77	10	12	11	3	13	9	-3		12	1	2	2	2	4	5	300	7	1	6	4	0	60	0	7	33	0	0	33
8898	12499	23952	2	-1	7.25804	0	104	112	95	1	103	97	32.5	1	1	205	88	88	90	86	103	7.5	14	-7	6	-2	-42	-16	7.13415	4	1	1	2	2	4	5	300	7	0	6	4	0	6	34	4	56	0	0	0
8898	12499	23952	2	-1	7.25804	0	104	112	95	1	103	97	32.5	1	2	125	88	88	90	86	103	7.5	14	-1	-6	-11	47	-7	-14.6341	-10	1	1	2	2	4	5	300	7	0	6	4	0	6	34	4	56	0	0	0
8898	12619	23952	3	0	7.25804	0	104	112	95	1	103	97	46.5	1	3	203	88	88	90	86	103	7.5	14	15	0	18	9	12	13.3333	-2	1	2	2	2	4	5	300	7	1	6	4	0	60	0	7	33	0	0	33
8899	12499	23952	2	-1	7.41684	0	94	79	110	2	97	100	4	1	1	205	97	98	97	97	100	7.5	16	8	1	14	2	-11	12.0122	10	1	1	2	2	4	5	300	7	0	6	4	0	6	34	4	56	0	0	0
8899	12499	23952	2	-1	7.41684	0	94	79	110	2	97	100	4	1	2	125	97	98	97	97	100	7.5	16	-16	-7	-19	-11	-1	-5.87583	-4	1	1	2	2	4	5	300	7	0	6	4	0	6	34	4	56	0	0	0
8899	12619	23952	3	0	7.41684	0	94	79	110	2	97	100	5	1	3	203	97	98	97	97	100	7.5	16	17	1	22	10	2	17.4747	16	1	2	2	2	4	5	300	7	1	6	4	0	60	0	7	33	0	0	33
8900	12498	23952	2	1	7.48528	0	114	105	119	2	96	98	17.5	1	1	181	93	115	100	92	70	15	18	-2	-5	-4	-3	16	-2.5	12	1	1	2	2	4	5	340	8	1	5	5	0	37	4	0	59	0	0	58
8900	12498	23952	2	1	7.48528	0	114	105	119	2	96	98	17.5	1	2	148	93	115	100	92	70	15	18	0	1	-2	7	-10	-12.5	-16	1	1	2	2	4	5	340	8	1	5	5	0	37	4	0	59	0	0	58
8900	12619	23952	3	0	7.48528	0	114	105	119	2	96	98	28	1	3	204	93	115	100	92	70	15	18	8	6	16	-7	11	0	18	1	2	2	2	4	5	300	7	1	6	4	0	60	0	7	33	0	0	33
8901	12498	23952	2	1	6.72416	1	119	118	114	2	78	90	35.5	1	1	173	106	108	98	116	106	17.0732	18	12	1	20	-3	-5	7.92683	10	1	1	2	2	4	5	340	8	1	5	5	0	37	4	0	59	0	0	58
8901	12498	23952	2	1	6.72416	1	119	118	114	2	78	90	35.5	1	2	149	106	108	98	116	106	17.0732	18	-11	-7	-10	-5	-12	-6.81818	-4	1	1	2	2	4	5	340	8	1	5	5	0	37	4	0	59	0	0	58
8901	12619	23952	3	0	6.72416	1	119	118	114	2	78	90	39.5	1	3	203	106	108	98	116	106	17.0732	18	14	4	17	5	6	10.7071	4	1	2	2	2	4	5	300	7	1	6	4	0	60	0	7	33	0	0	33
8902	12500	23952	5	0	10.0068	0	68	70	75	2	95	100	1.5	1	1	205	59	81	70	55	73		4	6	11	15	-4	-7		6	1	1	3	2	2	5	300	7	1	5	4	0	20	8	3	44	25	0	24
8902	12500	23952	5	0	10.0068	0	68	70	75	2	95	100	1.5	1	2	125	59	81	70	55	73		4	8	-5	6	7	8	0.711831	2	1	1	3	2	2	5	300	7	1	5	4	0	20	8	3	44	25	0	24
8902	12699	23952	6	0	10.0068	0	68	70	75	2	95	100	2	1	3	202	59	81	70	55	73		4	7	-2	-4	23	4	-0.151607	0	1	2						5
8903	12500	23952	5	0	9.96304	1	106	102	108	2	97	108	19.5	1	1	205	87	99	98	81	78	12.5	8	5	-1	6	3	3	10.119	10	1	1	3	2	2	5	300	7	1	5	4	0	20	8	3	44	25	0	24
8903	12500	23952	5	0	9.96304	1	106	102	108	2	97	108	19.5	1	2	125	87	99	98	81	78	12.5	8	7	8	7	11	-1	-16.4335	-8	1	1	3	2	2	5	300	7	1	5	4	0	20	8	3	44	25	0	24
8903	12699	23952	6	0	9.96304	1	106	102	108	2	97	108	14	1	3	202	87	99	98	81	78	12.5	8	6	-1	-3	10	14	18.3242	12	1	2						5
8904	12500	23952	5	0	10.3518	1	70	68	80	4	104	98	27.5	1	1	205	69	91	79	66	76	2.27273	6	0	-3	1	0	-4	-2.27273	8	1	1	3	2	2	5	300	7	1	5	4	0	20	8	3	44	25	0	24
8904	12500	23952	5	0	10.3518	1	70	68	80	4	104	98	27.5	1	2	124	69	91	79	66	76	2.27273	6	4	3	10	-6	4		-4	1	1	3	2	2	5	300	7	1	5	4	0	20	8	3	44	25	0	24
8904	12699	23952	6	0	10.3518	1	70	68	80	4	104	98	36.5	1	3	203	69	91	79	66	76	2.27273	6	12	7	2	25	1		-2	1	2						5
8905	12500	23952	5	0	9.87817	1	83	87	83	3	76	77	5.5	1	1	205	80	54	88	82	71		0	-1	2	5	-8	-6		14	1	1	3	2	2	5	300	7	1	5	4	0	20	8	3	44	25	0	24
8905	12500	23952	5	0	9.87817	1	83	87	83	3	76	77	5.5	1	2	125	80	54	88	82	71		0	-4	-3	3	-16	1	3.80461	-10	1	1	3	2	2	5	300	7	1	5	4	0	20	8	3	44	25	0	24
8905	12699	23952	6	0	9.87817	1	83	87	83	3	76	77	5	1	3	202	80	54	88	82	71		0	-3	2	-9	6	7	1.65757	8	1	2						5
8906	12500	23952	5	0	10.4832	1	103	101	103	2	105	108	5	1	1	205	88	98	106	73	80	10.2273	24	-2	4	-2	0	-7	4.05844	-2	1	1	3	2	2	5	300	7	1	5	4	0	20	8	3	44	25	0	24
8906	12500	23952	5	0	10.4832	1	103	101	103	2	105	108	5	1	2	124	88	98	106	73	80	10.2273	24	-2	-3	-4	1	-1	-0.883652	-8	1	1	3	2	2	5	300	7	1	5	4	0	20	8	3	44	25	0	24
8906	12699	23952	6	0	10.4832	1	103	101	103	2	105	108	5.5	1	3	203	88	98	106	73	80	10.2273	24	13	-1	2	21	19	-1.63736	0	1	2						5
8907	12500	23952	5	0	9.6783	1	100	112	88	4	104	109	7.5	1	1	205	96	102	105	84	99	2.27273	8	-7	4	-8	-4	-9	9.63203	12	1	1	3	2	2	5	300	7	1	5	4	0	20	8	3	44	25	0	24
8907	12500	23952	5	0	9.6783	1	100	112	88	4	104	109	7.5	1	2	125	96	102	105	84	99	2.27273	8	-1	-3	0	-4	7	-7.78105	-10	1	1	3	2	2	5	300	7	1	5	4	0	20	8	3	44	25	0	24
8907	12699	23952	6	0	9.6783	1	100	112	88	4	104	109	0.5	1	3	202	96	102	105	84	99	2.27273	8	9	5	9	11	1	16.4645	4	1	2						5
8908	12500	23952	5	0	10.3053	0	120	122	112	5	111	102	15	1	1	205	104		111	92	103		32	8		2	18	-5		-4	1	1	3	2	2	5	300	7	1	5	4	0	20	8	3	44	25	0	24
8908	12500	23952	5	0	10.3053	0	120	122	112	5	111	102	15	1	2	124	104		111	92	103		32	-13	-2	0	-31	6	-19.0599	-14	1	1	3	2	2	5	300	7	1	5	4	0	20	8	3	44	25	0	24
8908	12699	23952	6	0	10.3053	0	120	122	112	5	111	102	36.5	1	3	203	104		111	92	103		32	10	2	1	20	-3	-13.5031	4	1	2						5
8909	12500	23952	5	0	10.6667	1	118	118	113	2	111	108	0	1	1	205	97	112	107	89	88	4.54545	18	1	5	2	-6	11	20.4545	-8	1	1	3	2	2	5	300	7	1	5	4	0	20	8	3	44	25	0	24
8909	12500	23952	5	0	10.6667	1	118	118	113	2	111	108	0	1	2	126	97	112	107	89	88	4.54545	18	4	2	-2	11	3	-18.8144	6	1	1	3	2	2	5	300	7	1	5	4	0	20	8	3	44	25	0	24
8909	12699	23952	6	0	10.6667	1	118	118	113	2	111	108	0	1	3	201	97	112	107	89	88	4.54545	18	2	-6	-2	3	5	-2.264	4	1	2						5
8910	12500	23952	5	0	10.1766	0	79	82	82	4	95	79	3.5	1	1	205	63	89	80	58	54	0	4	9	3	9	5	11	0	10	1	1	3	2	2	5	300	7	1	5	4	0	20	8	3	44	25	0	24
8910	12500	23952	5	0	10.1766	0	79	82	82	4	95	79	3.5	1	2	124	63	89	80	58	54	0	4	-2	1	-7	2	8	1.03093	-10	1	1	3	2	2	5	300	7	1	5	4	0	20	8	3	44	25	0	24
8910	12699	23952	6	0	10.1766	0	79	82	82	4	95	79	3	1	3	204	63	89	80	58	54	0	4	7	-3	4	15	-6	-0.0505357	4	1	2						5
8911	12500	23952	5	0	10.0671	1	89	85	95	3	111	108	3.5	1	1	205	79	90	83	80	86	9.09091	8	3	1	12	-7	-7	9.95671	6	1	1	3	2	2	5	300	7	1	5	4	0	20	8	3	44	25	0	24
8911	12500	23952	5	0	10.0671	1	89	85	95	3	111	108	3.5	1	2	125	79	90	83	80	86	9.09091	8	2	8	-2	4	5	-14.9239	-8	1	1	3	2	2	5	300	7	1	5	4	0	20	8	3	44	25	0	24
8911	12699	23952	6	0	10.0671	1	89	85	95	3	111	108	8.5	1	3	202	79	90	83	80	86	9.09091	8	14	-1	10	17	10	6.6606	8	1	2						5
8912	12500	23952	5	0	10.3053	0	97	106	89	2	73	71	3	1	1	205			60	41			0			29	-11			0	1	1	3	2	2	5	300	7	1	5	4	0	20	8	3	44	25	0	24
8912	12500	23952	5	0	10.3053	0	97	106	89	2	73	71	3	1	2	124			60	41			0	-3	-3	-2	5	-17		0	1	1	3	2	2	5	300	7	1	5	4	0	20	8	3	44	25	0	24
8912	12699	23952	6	0	10.3053	0	97	106	89	2	73	71	4.5	1	3	203			60	41			0	8	6	-7	30	2		0	1	2						5
8914	12553	23974	2	1	7.45791	1	90	76	106	3	95	98	11.5	0	1	198	90	111	91	92	89	12.1951	12	3	0	5	1	-4	17.8049	18	1	1	2	1	4	5	300	7	0	6	5	0	51	19	3	22	5	0	0
8914	12553	23974	2	1	7.45791	1	90	76	106	3	95	98	11.5	0	2	136	90	111	91	92	89	12.1951	12	-8	-5	-4	-14	3	-23.3333	-20	1	1	2	1	4	5	300	7	0	6	5	0	51	19	3	22	5	0	0
8914	12665	23974	3	0	7.45791	1	90	76	106	3	95	98	9	0	3	177	90	111	91	92	89	12.1951	12	12	2	18	10	-12	20.6061	12	1	2	2	1	4		260	7			4	0	0	50	50	0	0	0	38
8915	12553	23974	2	1	7.66598	1	89	79	102	2	116	113		0	1	198	73	92	86	66	70	12.1951	10	-2	4	-6	-2	9	12.8049	8	1	1	2	1	4	5	300	7	0	6	5	0	51	19	3	22	5	0	0
8915	12553	23974	2	1	7.66598	1	89	79	102	2	116	113		0	2		73	92	86	66	70	12.1951	10								1	1	2	1	4	5	300	7	0	6	5	0	51	19	3	22	5	0	0
8915	12378	23945			7.66598	1	89	79	102	2	116	113		0	3		73	92	86	66	70	12.1951	10
8917	12553	23974	2	1	7.3128	0	89	88	93	2	96	98	8.5	0	1	198	113	102	117	105	96	34.1463	32	-7	-2	-1	-14	-1	15.8537	6	1	1	2	1	4	5	300	7	0	6	5	0	51	19	3	22	5	0	0
8917	12553	23974	2	1	7.3128	0	89	88	93	2	96	98	8.5	0	2	136	113	102	117	105	96	34.1463	32	-1	-1	-2	4	-6	-27.7778	-12	1	1	2	1	4	5	300	7	0	6	5	0	51	19	3	22	5	0	0
8917	12665	23974	3	0	7.3128	0	89	88	93	2	96	98	4.5	0	3	177	113	102	117	105	96	34.1463	32	-4	-1	-7	0	6	14.1414	4	1	2	2	1	4		260	7			4	0	0	50	50	0	0	0	38
8918	12553	23974	2	1	7.60301	0	95	94	97	4	87	98	4.5	0	1	198	85	97	86	89	82	14.6341	18	6	-2	11	-3	2	22.8659	10	1	1	2	1	4	5	300	7	0	6	5	0	51	19	3	22	5	0	0
8918	12553	23974	2	1	7.60301	0	95	94	97	4	87	98	4.5	0	2	138	85	97	86	89	82	14.6341	18	-7	-3	2	-20	0	-24.1667	-16	1	1	2	1	4	5	300	7	0	6	5	0	51	19	3	22	5	0	0
8918	12665	23974	3	0	7.60301	0	95	94	97	4	87	98	10.5	0	3	175	85	97	86	89	82	14.6341	18	7	1	4	13	1	-4.24242	8	1	2	2	1	4		260	7			4	0	0	50	50	0	0	0	38
8919	12553	23974	2	1	7.18138	1	85	79	95	2	103	109	0	0	1	198	100	112	93	115	95	19.5122	14	1	-4	11	-17	-2	10.4878	8	1	1	2	1	4	5	300	7	0	6	5	0	51	19	3	22	5	0	0
8919	12553	23974	2	1	7.18138	1	85	79	95	2	103	109	0	0	2	136	100	112	93	115	95	19.5122	14	2	0	8	-2	-13	-12.2222	8	1	1	2	1	4	5	300	7	0	6	5	0	51	19	3	22	5	0	0
8919	12665	23974	3	0	7.18138	1	85	79	95	2	103	109	9	0	3	177	100	112	93	115	95	19.5122	14	-2	-8	0	-3	4	2.67677	-16	1	2	2	1	4		260	7			4	0	0	50	50	0	0	0	38
8920	12553	23974	2	1	7.18138	0	72	70	82	3	127	131	14	0	1	198	113	116	116	104	104	26.8293	32	3	-1	3	-1	5	15.6707	2	1	1	2	1	4	5	300	7	0	6	5	0	51	19	3	22	5	0	0
8920	12553	23974	2	1	7.18138	0	72	70	82	3	127	131	14	0	2	136	113	116	116	104	104	26.8293	32	-6	0	-1	-7	-11	-33.6111	-22	1	1	2	1	4	5	300	7	0	6	5	0	51	19	3	22	5	0	0
8920	12665	23974	3	0	7.18138	0	72	70	82	3	127	131	9	0	3	177	113	116	116	104	104	26.8293	32	-5	-3	-6	-3	3	13.8384	10	1	2	2	1	4		260	7			4	0	0	50	50	0	0	0	38
8921	12553	23974	2	1	7.35934	1	88	91	88	2	119	101		0	1	198	90	91	89	98	82	12.1951	16	-7	5	-9	1	-17	0.304878	12	1	1	2	1	4	5	300	7	0	6	5	0	51	19	3	22	5	0	0
8921	12553	23974	2	1	7.35934	1	88	91	88	2	119	101		0	2		90	91	89	98	82	12.1951	16								1	1	2	1	4	5	300	7	0	6	5	0	51	19	3	22	5	0	0
8921	12378	23945			7.35934	1	88	91	88	2	119	101		0	3		90	91	89	98	82	12.1951	16
8923	12554	23974	5	0	10.1574	0	102	92	110	2	118	105	0	0	1	198	95	103	99	87	104	34.0909	14	8	4	4	21	-12	-10.2814	-4	1	1	2	1	4	5	300	8	0	3	4	0	3	37	0	58	2	0	0
8923	12554	23974	5	0	10.1574	0	102	92	110	2	118	105	0	0	2	136	95	103	99	87	104	34.0909	14	-4	-4	-4	-8	7	2.66106	8	1	1	2	1	4	5	300	8	0	3	4	0	3	37	0	58	2	0	0
8923	12666	23974	6	0	10.1574	0	102	92	110	2	118	105	3.5	0	3	177	95	103	99	87	104	34.0909	14	8	16	6	0	14	4.45725	16	0	2	2	2	4	4	240	8	0	4	4	3	21	20	7	49	0	0	14
8924	12554	23974	5	0	10.371	1	63	62	74	2	76	77	11	0	1	198	54	52	68	47	68	0	10	5	-4	9	2	-2	7.14286	0	1	1	2	1	4	5	300	8	0	3	4	0	3	37	0	58	2	0	0
8924	12554	23974	5	0	10.371	1	63	62	74	2	76	77	11	0	2	136	54	52	68	47	68	0	10	-10	8	-10	-8	-4	-5.18207	-6	1	1	2	1	4	5	300	8	0	3	4	0	3	37	0	58	2	0	0
8924	13369	23964	6		10.371	1	63	62	74	2	76	77	13	0	3		54	52	68	47	68	0	10
8925	12554	23974	5	0	10.1027	1	97	92	103	4	76	84	24	0	1	198	94	96	100	91	84	6.81818	14	-5	10	2	-11	-6	3.8961	8	1	1	2	1	4	5	300	8	0	3	4	0	3	37	0	58	2	0	0
8925	12554	23974	5	0	10.1027	1	97	92	103	4	76	84	24	0	2	136	94	96	100	91	84	6.81818	14	-4	2	-11	7	0	15.7563	-6	1	1	2	1	4	5	300	8	0	3	4	0	3	37	0	58	2	0	0
8925	12666	23974	6	0	10.1027	1	97	92	103	4	76	84	6	0	3	177	94	96	100	91	84	6.81818	14	9	6	8	4	13	-8.94482	0	0	2	2	2	4	4	240	8	0	4	4	3	21	20	7	49	0	0	14
8926	12554	23974	5	0	10.0808	0	108	106	107	3	91	92	8	0	1	198	109	92	114	98	105	27.2727	16	-1	11	-1	-1	1	0.108225	14	1	1	2	1	4	5	300	8	0	3	4	0	3	37	0	58	2	0	0
8926	12554	23974	5	0	10.0808	0	108	106	107	3	91	92	8	0	2	137	109	92	114	98	105	27.2727	16	-9	-7	-9	-6	0	0.070028	-18	1	1	2	1	4	5	300	8	0	3	4	0	3	37	0	58	2	0	0
8926	12666	23974	6	0	10.0808	0	108	106	107	3	91	92	0	0	3	176	109	92	114	98	105	27.2727	16	11	9	10	6	4	6.56964	14	0	2	2	2	4	4	240	8	0	4	4	3	21	20	7	49	0	0	14
8928	12554	23974	5	0	9.81793	1	61	60	71	3	100	77	0	0	1	198	24	50	21	45	66	7.95455	8	31	17	45	8	3	12.2835	4	1	1	2	1	4	5	300	8	0	3	4	0	3	37	0	58	2	0	0
8928	12554	23974	5	0	9.81793	1	61	60	71	3	100	77	0	0	2	137	24	50	21	45	66	7.95455	8	26	13	23	22	15	-1.61064	-6	1	1	2	1	4	5	300	8	0	3	4	0	3	37	0	58	2	0	0
8928	12666	23974	6	0	9.81793	1	61	60	71	3	100	77	0	0	3	176	24	50	21	45	66	7.95455	8	-14	0	-19	-3	-1	9.2076	10	0	2	2	2	4	4	240	8	0	4	4	3	21	20	7	49	0	0	14
8929	12554	23974	5	0	10.4969	0	97	99	95	4	107	108	0	0	1	198	92	93	95	98	77	14.7727	26	0	5	7	-11	2	12.6082	-2	1	1	2	1	4	5	300	8	0	3	4	0	3	37	0	58	2	0	0
8929	12554	23974	5	0	10.4969	0	97	99	95	4	107	108	0	0	2	136	92	93	95	98	77	14.7727	26	6	-3	2	11	6	-21.4986	-10	1	1	2	1	4	5	300	8	0	3	4	0	3	37	0	58	2	0	0
8929	12666	23974	6	0	10.4969	0	97	99	95	4	107	108	1	0	3	177	92	93	95	98	77	14.7727	26	1	10	-2	3	4	25.0455	12	0	2	2	2	4	4	240	8	0	4	4	3	21	20	7	49	0	0	14
8931	12554	23974	5	0	10.2231	1	102	108	95	6	105	102	0	0	1	198	101	109	99	100	105	37.5	14	1	0	6	-4	0	-8.92857	12	1	1	2	1	4	5	300	8	0	3	4	0	3	37	0	58	2	0	0
8931	12554	23974	5	0	10.2231	1	102	108	95	6	105	102	0	0	2	154	101	109	99	100	105	37.5	14	-3	7	-6	-3	7	0.840336	-2	1	1	2	1	4	5	300	8	0	3	4	0	3	37	0	58	2	0	0
8931	12657	23986	6	-1	10.2231	1	102	108	95	6	105	102	6	0	3	160	101	109	99	100	105	37.5	14	6	-4	6	7	-5	-1.57671	-2	1	2	3	2	4	5	350	7	1	4	3	0	46	7	0	0	47	0	48
8932	12554	23974	5	0	9.9384	1	69	67	79	3	76	77		0	1	198	66	82	67	77	70	5.68182	8								1	1	2	1	4	5	300	8	0	3	4	0	3	37	0	58	2	0	0
8932	12554	23974	5	0	9.9384	1	69	67	79	3	76	77		0	2	154	66	82	67	77	70	5.68182	8								1	1	2	1	4	5	300	8	0	3	4	0	3	37	0	58	2	0	0
8932	13369	23964	6		9.9384	1	69	67	79	3	76	77		0	3		66	82	67	77	70	5.68182	8
8933	12554	23974	5	0	10.1328	1	115	106	119	4	102	94	2	0	1	198	101	98	102	105	87	18.1818	18	5	4	1	14	-5	2.05628	12	1	1	2	1	4	5	300	8	0	3	4	0	3	37	0	58	2	0	0
8933	12554	23974	5	0	10.1328	1	115	106	119	4	102	94	2	0	2	136	101	98	102	105	87	18.1818	18	-8	5	-4	-22	13	-1.61064	-12	1	1	2	1	4	5	300	8	0	3	4	0	3	37	0	58	2	0	0
8933	12666	23974	6	0	10.1328	1	115	106	119	4	102	94	6.5	0	3	177	101	98	102	105	87	18.1818	18	4	1	4	7	0	-8.31817	12	0	2	2	2	4	4	240	8	0	4	4	3	21	20	7	49	0	0	14
8935	12554	23974	5	0	9.70842	1	73	64	89	4	110	110		0	1	198	69	81	69	80	77	9.09091	10	12	-2	20	-1	2	11.1472	2	1	1	2	1	4	5	300	8	0	3	4	0	3	37	0	58	2	0	0
8935	12554	23974	5	0	9.70842	1	73	64	89	4	110	110		0	2		69	81	69	80	77	9.09091	10								1	1	2	1	4	5	300	8	0	3	4	0	3	37	0	58	2	0	0
8935	12378	23945			9.70842	1	73	64	89	4	110	110		0	3		69	81	69	80	77	9.09091	10
8936	12554	23974	5	0	9.70842	1	89	80	101	6	111	125	0	0	1	198	92	82	89	91	111	32.9545	10	13	5	12	9	4	-18.6688	14	1	1	2	1	4	5	300	8	0	3	4	0	3	37	0	58	2	0	0
8936	12554	23974	5	0	9.70842	1	89	80	101	6	111	125	0	0	2	137	92	82	89	91	111	32.9545	10	2	-2	5	-6	10	6.30252	-14	1	1	2	1	4	5	300	8	0	3	4	0	3	37	0	58	2	0	0
8936	12666	23974	6	0	9.70842	1	89	80	101	6	111	125	0	0	3	176	92	82	89	91	111	32.9545	10	-2	4	-7	9	-7	2.09218	6	0	2	2	2	4	4	240	8	0	4	4	3	21	20	7	49	0	0	14
8937	12554	23974	5	0	10.4887	0	111	112	107	5	118	122	9	0	1	198	113	104	113	106	109	25	28	7	9	6	6	4	-2.38095	2	1	1	2	1	4	5	300	8	0	3	4	0	3	37	0	58	2	0	0
8937	12554	23974	5	0	10.4887	0	111	112	107	5	118	122	9	0	2	136	113	104	113	106	109	25	28	-14	-3	-9	-21	1	-13.7955	-8	1	1	2	1	4	5	300	8	0	3	4	0	3	37	0	58	2	0	0
8937	12666	23974	6	0	10.4887	0	111	112	107	5	118	122	18.5	0	3	177	113	104	113	106	109	25	28	4	11	-1	10	0	0.454821	10	0	2	2	2	4	4	240	8	0	4	4	3	21	20	7	49	0	0	14
8938	12554	23974	5	0	9.79055	0	94	87	108	4	81	94	20.5	0	1	198	78	83	97	62	69	7.95455	14	12	-1	4	27	-4	-6.76407	10	1	1	2	1	4	5	300	8	0	3	4	0	3	37	0	58	2	0	0
8938	12554	23974	5	0	9.79055	0	94	87	108	4	81	94	20.5	0	2		78	83	97	62	69	7.95455	14			-4	-17			-16	1	1	2	1	4	5	300	8	0	3	4	0	3	37	0	58	2	0	0
8938	12666	23974	6	0	9.79055	0	94	87	108	4	81	94	26.5	0	3		78	83	97	62	69	7.95455	14			1	7			12	0	2	2	2	4	4	240	8	0	4	4	3	21	20	7	49	0	0	14
8939	12554	23974	5	0	10.4175	0	109	112	103	2	102	91	28.5	0	1	198	92	87	98	88	87	20.4545	10	3	6	0	10	-3	-7.35931	16	1	1	2	1	4	5	300	8	0	3	4	0	3	37	0	58	2	0	0
8939	12554	23974	5	0	10.4175	0	109	112	103	2	102	91	28.5	0	2	136	92	87	98	88	87	20.4545	10	-1	3	2	-6	0	8.47339	-12	1	1	2	1	4	5	300	8	0	3	4	0	3	37	0	58	2	0	0
8939	12666	23974	6	0	10.4175	0	109	112	103	2	102	91	13.5	0	3	177	92	87	98	88	87	20.4545	10	3	-4	4	0	7	9.35921	8	0	2	2	2	4	4	240	8	0	4	4	3	21	20	7	49	0	0	14
8940	12554	23974	5	0	9.99042	1	111	121	98	5	127	132	9	0	1	198	96	115	103	89	95	36.3636	22	2	-6	4	2	-5	-13.7446	0	1	1	2	1	4	5	300	8	0	3	4	0	3	37	0	58	2	0	0
8940	12554	23974	5	0	9.99042	1	111	121	98	5	127	132	9	0	2	137	96	115	103	89	95	36.3636	22	-9	12	-5	-21	8	4.83193	-8	1	1	2	1	4	5	300	8	0	3	4	0	3	37	0	58	2	0	0
8940	12666	23974	6	0	9.99042	1	111	121	98	5	127	132	6	0	3	176	96	115	103	89	95	36.3636	22	9	-7	0	21	6	-0.646857	0	0	2	2	2	4	4	240	8	0	4	4	3	21	20	7	49	0	0	14
8941	12554	23974	5	0	10.6667	0	92	99	87	2	110	98	1.5	0	1	198	82	70	90	83	73	11.3636	10	9	8	7	3	19	-1.83983	6	1	1	2	1	4	5	300	8	0	3	4	0	3	37	0	58	2	0	0
8941	12554	23974	5	0	10.6667	0	92	99	87	2	110	98	1.5	0	2	138	82	70	90	83	73	11.3636	10	5	5	8	-3	7	16.9468	0	1	1	2	1	4	5	300	8	0	3	4	0	3	37	0	58	2	0	0
8941	12666	23974	6	0	10.6667	0	92	99	87	2	110	98	4.5	0	3	175	82	70	90	83	73	11.3636	10	-7	5	-6	-2	-11	0.333535	6	0	2	2	2	4	4	240	8	0	4	4	3	21	20	7	49	0	0	14
8942	12501	23953	2	0	6.79261	1	95	91	100	3	104	110	0	1	1	177	117	114	121	110	85	4.87805	26	-8	-3	-11	-5	16	7.62195	-4	1	1	2	4	4	5	300	10	1	6	5	4	50	2	0	37	3	4	38
8942	12501	23953	2	0	6.79261	1	95	91	100	3	104	110	0	1	2	154	117	114	121	110	85	4.87805	26	-3	-2	2	-7	-7	0.833333	-10	1	1	2	4	4	5	300	10	1	6	5	4	50	2	0	37	3	4	38
8942	12621	23953	3	1	6.79261	1	95	91	100	3	104	110	0	1	3	194	117	114	121	110	85	4.87805	26	8	-6	8	8	-4	13.9394	14	1	2	2	2	3	5	215	5	1	5	4	6	51	0	0	43	0	0	43
8944	12501	23953	2	0	7.61123	0	72	76	76	3	84	92	27	1	1	176	100	95	95	113	94	17.0732	12	-11	-5	-10	-14	-8	-2.07317	6	1	1	2	4	4	5	300	10	1	6	5	4	50	2	0	37	3	4	38
8944	12501	23953	2	0	7.61123	0	72	76	76	3	84	92	27	1	2	156	100	95	95	113	94	17.0732	12	9	-1	21	-9	0	-10.5556	-6	1	1	2	4	4	5	300	10	1	6	5	4	50	2	0	37	3	4	38
8944	12621	23953	3	1	7.61123	0	72	76	76	3	84	92	13	1	3	193	100	95	95	113	94	17.0732	12	2	-1	-9	21	2	11.4646	16	1	2	2	2	3	5	215	5	1	5	4	6	51	0	0	43	0	0	43
8945	12501	23953	2	0	6.85832	0	118	112	118	2	90	96	1.5	1	1	176	138	119	140	130	93	7.31707	32	-11	-1	-4	-21	1	7.68293	2	1	1	2	4	4	5	300	10	1	6	5	4	50	2	0	37	3	4	38
8945	12501	23953	2	0	6.85832	0	118	112	118	2	90	96	1.5	1	2	155	138	119	140	130	93	7.31707	32	-5	3	-3	-2	-13	-6.11111	-20	1	1	2	4	4	5	300	10	1	6	5	4	50	2	0	37	3	4	38
8945	12621	23953	3	1	6.85832	0	118	112	118	2	90	96	2	1	3	194	138	119	140	130	93	7.31707	32	-9	-3	-10	-6	5	0.20202	22	1	2	2	2	3	5	215	5	1	5	4	6	51	0	0	43	0	0	43
8946	12501	23953	2	0	7.40041	0	104	114	93	2	93	98	28.5	1	1	176	108	96	107	112	91	7.31707	24	7	0	11	-4	8	17.6829	14	1	1	2	4	4	5	300	10	1	6	5	4	50	2	0	37	3	4	38
8946	12501	23953	2	0	7.40041	0	104	114	93	2	93	98	28.5	1	2	155	108	96	107	112	91	7.31707	24	-4	4	-5	-1	-1	-11.6667	-16	1	1	2	4	4	5	300	10	1	6	5	4	50	2	0	37	3	4	38
8946	12621	23953	3	1	7.40041	0	104	114	93	2	93	98	11	1	3	194	108	96	107	112	91	7.31707	24	-3	-4	0	-2	-8	-13.3333	14	1	2	2	2	3	5	215	5	1	5	4	6	51	0	0	43	0	0	43
8947	12501	23953	2	0	7.28542	0	92	88	98	2	86	89		1	1	176	92	105	90	105	71	2.43902	20	7	-6	15	-9	10	12.561	4	1	1	2	4	4	5	300	10	1	6	5	4	50	2	0	37	3	4	38
8947	12501	23953	2	0	7.28542	0	92	88	98	2	86	89		1	2	159	92	105	90	105	71	2.43902	20	-3	2	-1	-1	-13		-6	1	1	2	4	4	5	300	10	1	6	5	4	50	2	0	37	3	4	38
8947	12621	23953	3	1	7.28542	0	92	88	98	2	86	89		1	3	190	92	105	90	105	71	2.43902	20	-12	-3	-4	-27	7		8	1	2	2	2	3	5	215	5	1	5	4	6	51	0	0	43	0	0	43
8948	12501	23953	2	0	7.40862	1	96	88	104	3	97	101	12	1	1	176	106	96	107	107	90	7.31707	22	-11	0	-11	-9	0	12.6829	0	1	1	2	4	4	5	300	10	1	6	5	4	50	2	0	37	3	4	38
8948	12501	23953	2	0	7.40862	1	96	88	104	3	97	101	12	1	2	155	106	96	107	107	90	7.31707	22	6	-1	9	-1	4	-11.1111	0	1	1	2	4	4	5	300	10	1	6	5	4	50	2	0	37	3	4	38
8948	12621	23953	3	1	7.40862	1	96	88	104	3	97	101	2	1	3	194	106	96	107	107	90	7.31707	22	3	-2	-4	12	0	11.5657	-2	1	2	2	2	3	5	215	5	1	5	4	6	51	0	0	43	0	0	43
8949	12501	23953	2	0	7.02533	1	90	84	98	2	89	92		1	1	177	97	75	94	106	86	0	10	0	9	5	-6	-3	17.5	16	1	1	2	4	4	5	300	10	1	6	5	4	50	2	0	37	3	4	38
8949	12501	23953	2	0	7.02533	1	90	84	98	2	89	92		1	2	154	97	75	94	106	86	0	10	8	0	16	-5	4	-15.2273	-6	1	1	2	4	4	5	300	10	1	6	5	4	50	2	0	37	3	4	38
8949	12621	23953	3	1	7.02533	1	90	84	98	2	89	92		1	3	194	97	75	94	106	86	0	10	-19	-3	-25	-9	-2	20.4545	2	1	2	2	2	3	5	215	5	1	5	4	6	51	0	0	43	0	0	43
8950	12501	23953	2	0	7.43326	0	77	76	85	0	79	77		1	1		56	51	69	53	65	4.87805	8								1	1	2	4	4	5	300	10	1	6	5	4	50	2	0	37	3	4	38
8950	12501	23953	2	0	7.43326	0	77	76	85	0	79	77		1	2		56	51	69	53	65	4.87805	8								1	1	2	4	4	5	300	10	1	6	5	4	50	2	0	37	3	4	38
8950	12378	23945			7.43326	0	77	76	85	0	79	77		1	3		56	51	69	53	65	4.87805	8
8951	12501	23953	2	0	6.76797	1	75	70	87	2	75	97	21	1	1	176	106	94	107	105	91	17.0732	18	-4	3	-8	0	8	7.92683	-2	1	1	2	4	4	5	300	10	1	6	5	4	50	2	0	37	3	4	38
8951	12501	23953	2	0	6.76797	1	75	70	87	2	75	97	21	1	2	155	106	94	107	105	91	17.0732	18	-5	-6	2	-11	-4	-15.9091	4	1	1	2	4	4	5	300	10	1	6	5	4	50	2	0	37	3	4	38
8951	12621	23953	3	1	6.76797	1	75	70	87	2	75	97	6.5	1	3		106	94	107	105	91	17.0732	18								1	2	2	2	3	5	215	5	1	5	4	6	51	0	0	43	0	0	43
8952	12501	23953	2	0	6.7269	0	92	83	103	2	111	115		1	1	177	104	104	102	106	97	2.43902	34	0	-2	20	-24	4	10.061	-10	1	1	2	4	4	5	300	10	1	6	5	4	50	2	0	37	3	4	38
8952	12501	23953	2	0	6.7269	0	92	83	103	2	111	115		1	2	154	104	104	102	106	97	2.43902	34	-1	0	-16	18	-6	-5.83333	-6	1	1	2	4	4	5	300	10	1	6	5	4	50	2	0	37	3	4	38
8952	12621	23953	3	1	6.7269	0	92	83	103	2	111	115		1	3	194	104	104	102	106	97	2.43902	34	-10	-6	0	-15	-24	0.151515	-4	1	2	2	2	3	5	215	5	1	5	4	6	51	0	0	43	0	0	43
8953	12501	23953	2	0	6.81177	1	94	84	106	3	110	118	37.5	1	1	177	101	109	103	103	85	19.5122	12	1	-2	0	-3	16	2.9878	6	1	1	2	4	4	5	300	10	1	6	5	4	50	2	0	37	3	4	38
8953	12501	23953	2	0	6.81177	1	94	84	106	3	110	118	37.5	1	2	155	101	109	103	103	85	19.5122	12	6	-4	5	8	-5	-4.72222	2	1	1	2	4	4	5	300	10	1	6	5	4	50	2	0	37	3	4	38
8953	12621	23953	3	1	6.81177	1	94	84	106	3	110	118	14	1	3	193	101	109	103	103	85	19.5122	12	-4	-6	4	-11	-10	2.67677	8	1	2	2	2	3	5	215	5	1	5	4	6	51	0	0	43	0	0	43
8954	12501	23953	2	0	6.98973	0	92	87	101	3	98	144	7.5	1	1	177	91	88	85	106	82	0	20	5	0	14	-11	8	12.5	-8	1	1	2	4	4	5	300	10	1	6	5	4	50	2	0	37	3	4	38
8954	12501	23953	2	0	6.98973	0	92	87	101	3	98	144	7.5	1	2	154	91	88	85	106	82	0	20	-11	3	-5	-20	3	-7.95455	8	1	1	2	4	4	5	300	10	1	6	5	4	50	2	0	37	3	4	38
8954	12501	23953	3	-1	6.98973	0	92	87	101	3	98	144	4	1	3	194	91	88	85	106	82	0	20	-3	-3	2	-9	-11	11.3636	10	1	2	2	3	4	5	350	7	1	5	4	0	44	0	13	22	11	10	44
8955	12501	23953	2	0	7.16222	0	110	105	111	3	124	114	1.5	1	1	177	133	118	134	123	101	9.7561	22	-6	-1	-3	-16	13	20.2439	10	1	1	2	4	4	5	300	10	1	6	5	4	50	2	0	37	3	4	38
8955	12501	23953	2	0	7.16222	0	110	105	111	3	124	114	1.5	1	2	153	133	118	134	123	101	9.7561	22	-9	4	-13	-2	0	-7.77778	-6	1	1	2	4	4	5	300	10	1	6	5	4	50	2	0	37	3	4	38
8955	12621	23953	3	1	7.16222	0	110	105	111	3	124	114	6	1	3	195	133	118	134	123	101	9.7561	22	-5	-7	-2	-1	-13	2.77778	-8	1	2	2	2	3	5	215	5	1	5	4	6	51	0	0	43	0	0	43
8956	12501	23953	2	0	7.45243	1	91	91	93	2	119	113		1	1		93	106	94	97	89	7.31707	16								1	1	2	4	4	5	300	10	1	6	5	4	50	2	0	37	3	4	38
8956	12501	23953	2	0	7.45243	1	91	91	93	2	119	113		1	2		93	106	94	97	89	7.31707	16								1	1	2	4	4	5	300	10	1	6	5	4	50	2	0	37	3	4	38
8956	12378	23945			7.45243	1	91	91	93	2	119	113		1	3		93	106	94	97	89	7.31707	16
8957	12501	23953	2	0	7.13758	0	111	103	115	4	106	116	3	1	1	177	84	111	87	89	77	12.1951	12	10	1	11	0	22	2.80488	2	1	1	2	4	4	5	300	10	1	6	5	4	50	2	0	37	3	4	38
8957	12501	23953	2	0	7.13758	0	111	103	115	4	106	116	3	1	2	153	84	111	87	89	77	12.1951	12	-10	1	-16	0	-1	-1.66667	0	1	1	2	4	4	5	300	10	1	6	5	4	50	2	0	37	3	4	38
8957	12621	23953	3	1	7.13758	0	111	103	115	4	106	116	1	1	3	195	84	111	87	89	77	12.1951	12	13	-6	16	11	-7	16.2121	6	1	2	2	2	3	5	215	5	1	5	4	6	51	0	0	43	0	0	43
8958	12502	23953	5	-1	10.1684	1	85	87	87	3	109	98	54	1	1	170	82	80	92	75	81	8.33333	6	-10	2	5	-25	-15	-1.51515	14	1	1	2	1	4	5	240	9	1	6	4	0	18	15	6	61	0	0	47
8958	12502	23953	5	-1	10.1684	1	85	87	87	3	109	98	54	1	2	160	82	80	92	75	81	8.33333	6	9	-3	-2	23	5	-6.81818	-12	1	1	2	1	4	5	240	9	1	6	4	0	18	15	6	61	0	0	47
8958	12622	23953	6	1	10.1684	1	85	87	87	3	109	98	14.5	1	3	195	82	80	92	75	81	8.33333	6	-4	-4	-2	-8	2	12.3711	-2	0	2	2	1	2	5	300		1	5	4	0	22	37	0	0	41	0	41
8959	12502	23953	5	-1	9.80424	0	92	94	92	2	104	108	19.5	1	1	170	74	93	85	71	68	0	6	6	0	3	7	13	5.68182	6	1	1	2	1	4	5	240	9	1	6	4	0	18	15	6	61	0	0	47
8959	12502	23953	5	-1	9.80424	0	92	94	92	2	104	108	19.5	1	2	161	74	93	85	71	68	0	6	1	-2	6	-11	4	-0.779857	-2	1	1	2	1	4	5	240	9	1	6	4	0	18	15	6	61	0	0	47
8959	12622	23953	6	1	9.80424	0	92	94	92	2	104	108	5	1	3	194	74	93	85	71	68	0	6	-5	-3	-5	0	-10	3.34546	-2	0	2	2	1	2	5	300		1	5	4	0	22	37	0	0	41	0	41
8960	12502	23953	5	-1	9.73854	1	94	97	93	3	102	96		1	1	170	91	90	104	83	74	10.7143	16	-9	-3	-13	-5	1	1.78571	-2	1	1	2	1	4	5	240	9	1	6	4	0	18	15	6	61	0	0	47
8960	12502	23953	5	-1	9.73854	1	94	97	93	3	102	96		1	2	161	91	90	104	83	74	10.7143	16	15	1	17	15	4	-8.57843	0	1	1	2	1	4	5	240	9	1	6	4	0	18	15	6	61	0	0	47
8960	12622	23953	6	1	9.73854	1	94	97	93	3	102	96		1	3	194	91	90	104	83	74	10.7143	16	-17	-2	-21	-11	-7	-3.92157	-8	0	2	2	1	2	5	300		1	5	4	0	22	37	0	0	41	0	41
8961	12502	23953	5	-1	9.79603	1	77	87	73	3	105	105	19.5	1	1	170	90	97	104	79	74	16.6667	14	-5	-4	-10	-4	20	-3.0303	-2	1	1	2	1	4	5	240	9	1	6	4	0	18	15	6	61	0	0	47
8961	12502	23953	5	-1	9.79603	1	77	87	73	3	105	105	19.5	1	2	161	90	97	104	79	74	16.6667	14	2	11	1	4	0	-0.891266	0	1	1	2	1	4	5	240	9	1	6	4	0	18	15	6	61	0	0	47
8961	12622	23953	6	1	9.79603	1	77	87	73	3	105	105	14	1	3	194	90	97	104	79	74	16.6667	14	0	-9	-1	0	-2	10.9662	2	0	2	2	1	2	5	300		1	5	4	0	22	37	0	0	41	0	41
8962	12502	23953	5	-1	10.59	1	77	94	67	2	90	91	42	1	1	170	67	86	81	64	61	0	10	9	-2	12	4	4	5.68182	4	1	1	2	1	4	5	240	9	1	6	4	0	18	15	6	61	0	0	47
8962	12502	23953	5	-1	10.59	1	77	94	67	2	90	91	42	1	2	162	67	86	81	64	61	0	10	-1	6	-4	2	1	7.06328	-4	1	1	2	1	4	5	240	9	1	6	4	0	18	15	6	61	0	0	47
8962	12622	23953	6	1	10.59	1	77	94	67	2	90	91	14	1	3	193	67	86	81	64	61	0	10	-5	-2	-2	-7	-1	3.74975	-4	0	2	2	1	2	5	300		1	5	4	0	22	37	0	0	41	0	41
8963	12502	23953	5	-1	10.5544	1	83	86	84	3	93	98	94.5	1	1	170	80	90	95	68	76	13.0952	14	-4	1	-5	-3	6	-2.86797	2	1	1	2	1	4	5	240	9	1	6	4	0	18	15	6	61	0	0	47
8963	12502	23953	5	-1	10.5544	1	83	86	84	3	93	98	94.5	1	2	162	80	90	95	68	76	13.0952	14	8	-1	8	9	-4	0.557041	-6	1	1	2	1	4	5	240	9	1	6	4	0	18	15	6	61	0	0	47
8963	12622	23953	6	1	10.5544	1	83	86	84	3	93	98	2.5	1	3	193	80	90	95	68	76	13.0952	14	-9	-6	-11	-4	-3	-1.50596	-2	0	2	2	1	2	5	300		1	5	4	0	22	37	0	0	41	0	41
8965	12503	23954	2	0	7.04997	1	123	123	117	4	121	121	39	1	1	186	116	121	117	106	112	27.5	40	-9	0	-8	-6	-7	-7.9878	-8	1	1	2	1	4	5	310	8	1	6	4	19	55	0	5	21	0	0	0
8965	12503	23954	2	0	7.04997	1	123	123	117	4	121	121	39	1	2	146	116	121	117	106	112	27.5	40	11	-3	8	16	-4	-1.33038	-4	1	1	2	1	4	5	310	8	1	6	4	19	55	0	5	21	0	0	0
8965	12504	23954	3	1	7.04997	1	123	123	117	4	121	121	10	1	3	198	116	121	117	106	112	27.5	40	12	-2	8	13	4	24.0404	8	1	2	2	2	3	5	300	8	1	5	4	5	61	31	0	3	0	0	0
8966	12503	23954	2	0	7.5154	0	117	118	111	3	109	103	51	1	1	185	106	113	114	101	70	12.5	20	-2	0	-5	0	20	19.2073	4	1	1	2	1	4	5	310	8	1	6	4	19	55	0	5	21	0	0	0
8966	12503	23954	2	0	7.5154	0	117	118	111	3	109	103	51	1	2	146	106	113	114	101	70	12.5	20	-1	-8	4	-7	-7	-8.98004	2	1	1	2	1	4	5	310	8	1	6	4	19	55	0	5	21	0	0	0
8966	12504	23954	3	1	7.5154	0	117	118	111	3	109	103	11	1	3	191	106	113	114	101	70	12.5	20	4	4	-3	3	23	19.4949	2	1	2	2	2	3	5	300	8	1	5	4	5	61	31	0	3	0	0	0
8967	12503	23954	2	0	6.71047	0	123	129	110	2	103	106	12	1	1	185	120	116	119	118	104	17.5	16	-4	-2	-1	-11	1	-5.30488	6	1	1	2	1	4	5	310	8	1	6	4	19	55	0	5	21	0	0	0
8967	12503	23954	2	0	6.71047	0	123	129	110	2	103	106	12	1	2	147	120	116	119	118	104	17.5	16	-3	-1	-6	6	-6	-5.37694	6	1	1	2	1	4	5	310	8	1	6	4	19	55	0	5	21	0	0	0
8967	12623	23954	3	-1	6.71047	0	123	129	110	2	103	106	2	1	3	190	120	116	119	118	104	17.5	16	6	-2	8	0	3	8.73737	4	1	2	1	1	4		260		0	5	4	0	9	43	3	43	2	0	0
8968	12503	23954	2	0	6.98973	1	119	126	106	2	110	114	43.5	1	1	185	106	105	105	107	99	15	16	-1	0	9	-15	-3	-0.365854	16	1	1	2	1	4	5	310	8	1	6	4	19	55	0	5	21	0	0	0
8968	12503	23954	2	0	6.98973	1	119	126	106	2	110	114	43.5	1	2	147	106	105	105	107	99	15	16	-11	1	-17	3	-10	-5.54324	-24	1	1	2	1	4	5	310	8	1	6	4	19	55	0	5	21	0	0	0
8968	12623	23954	3	-1	6.98973	1	119	126	106	2	110	114	28	1	3	190	106	105	105	107	99	15	16	16	-2	22	5	2	-2.42424	12	1	2	1	1	4		260		0	5	4	0	9	43	3	43	2	0	0
8969	12503	23954	2	0	6.77892	0	89	84	96	2	97	95	40.5	1	1	185	117	100	116	118	97	17.5	18	-19	-11	-10	-23	-22	4.45122	4	1	1	2	1	4	5	310	8	1	6	4	19	55	0	5	21	0	0	0
8969	12503	23954	2	0	6.77892	0	89	84	96	2	97	95	40.5	1	2	147	117	100	116	118	97	17.5	18	6	-2	11	-7	19	-10.5876	6	1	1	2	1	4	5	310	8	1	6	4	19	55	0	5	21	0	0	0
8969	12623	23954	3	-1	6.77892	0	89	84	96	2	97	95	10	1	3	190	117	100	116	118	97	17.5	18	-7	0	-9	-2	-6	-0.252525	2	1	2	1	1	4		260		0	5	4	0	9	43	3	43	2	0	0
8970	12503	23954	2	0	6.88569	1	110	114	103	4	106	127	103.5	1	1	179	109	116	113	103	92	12.5	26	10	0	16	0	-5	4.57317	8	1	1	2	1	4	5	310	8	1	6	4	19	55	0	5	21	0	0	0
8970	12503	23954	2	0	6.88569	1	110	114	103	4	106	127	103.5	1	2	147	109	116	113	103	92	12.5	26	-1	-6	-4	7	-6	-5.70953	-8	1	1	2	1	4	5	310	8	1	6	4	19	55	0	5	21	0	0	0
8970	12504	23954	3	1	6.88569	1	110	114	103	4	106	127	26.5	1	3	190	109	116	113	103	92	12.5	26	2	0	0	0	13	4.19192	2	1	2	2	2	3	5	300	8	1	5	4	5	61	31	0	3	0	0	0
8971	12503	23954	2	0	7.27995	0	115	122	103	2	97	88	37.5	1	1	185	104	103	101	107	103	22.5	12	-12	-4	-9	-11	-15	-12.7439	2	1	1	2	1	4	5	310	8	1	6	4	19	55	0	5	21	0	0	0
8971	12503	23954	2	0	7.27995	0	115	122	103	2	97	88	37.5	1	2	146	104	103	101	107	103	22.5	12	0	-2	4	-6	1	-5.21064	16	1	1	2	1	4	5	310	8	1	6	4	19	55	0	5	21	0	0	0
8971	12504	23954	3	1	7.27995	0	115	122	103	2	97	88	21.5	1	3	191	104	103	101	107	103	22.5	12	5	-1	5	-2	17	37.6768	2	1	2	2	2	3	5	300	8	1	5	4	5	61	31	0	3	0	0	0
8972	12503	23954	2	0	7.50445	1	104	94	112	4	107	111	46.5	1	1	185	99	111	103	92	101	20	26	-8	3	-1	-12	-10	-2.92683	-6	1	1	2	1	4	5	310	8	1	6	4	19	55	0	5	21	0	0	0
8972	12503	23954	2	0	7.50445	1	104	94	112	4	107	111	46.5	1	2	146	99	111	103	92	101	20	26	5	-4	6	3	3	-14.8004	4	1	1	2	1	4	5	310	8	1	6	4	19	55	0	5	21	0	0	0
8972	12504	23954	3	1	7.50445	1	104	94	112	4	107	111	18.5	1	3	191	99	111	103	92	101	20	26	11	6	10	2	16	51.0606	12	1	2	2	2	3	5	300	8	1	5	4	5	61	31	0	3	0	0	0
8973	12503	23954	2	0	7.08556	1	113	115	107	2	121	131	34.5	1	1	185	111	108	114	106	98	12.5	18	-10	-14	-6	-12	-4	-5.18293	14	1	1	2	1	4	5	310	8	1	6	4	19	55	0	5	21	0	0	0
8973	12503	23954	2	0	7.08556	1	113	115	107	2	121	131	34.5	1	2	147	111	108	114	106	98	12.5	18	9	11	9	8	-8	6.31929	-6	1	1	2	1	4	5	310	8	1	6	4	19	55	0	5	21	0	0	0
8973	12504	23954	3	1	7.08556	1	113	115	107	2	121	131	11.5	1	3	190	111	108	114	106	98	12.5	18	2	-5	6	-12	22	10.8081	8	1	2	2	2	3	5	300	8	1	5	4	5	61	31	0	3	0	0	0
8974	12503	23954	2	0	7.02533	0	105	105	103	2	116	114	27	1	1	185	123	115	129	107	100	20	18	-8	-6	-9	-2	-4	-12.6829	6	1	1	2	1	4	5	310	8	1	6	4	19	55	0	5	21	0	0	0
8974	12503	23954	2	0	7.02533	0	105	105	103	2	116	114	27	1	2	147	123	115	129	107	100	20	18	10	-3	12	7	-3	6.31929	0	1	1	2	1	4	5	310	8	1	6	4	19	55	0	5	21	0	0	0
8974	12504	23954	3	1	7.02533	0	105	105	103	2	116	114	7	1	3	190	123	115	129	107	100	20	18	-4	4	-11	-3	22	17.4747	8	1	2	2	2	3	5	300	8	1	5	4	5	61	31	0	3	0	0	0
8975	12503	23954	2	0	7.21424	1	90	82	100	2	110	97	33	1	1	185	83	87	92	82	73	12.5	18	-4	4	1	-18	10	11.8902	2	1	1	2	1	4	5	310	8	1	6	4	19	55	0	5	21	0	0	0
8975	12503	23954	2	0	7.21424	1	90	82	100	2	110	97	33	1	2	147	83	87	92	82	73	12.5	18	5	-2	-10	27	4	-19.8448	-8	1	1	2	1	4	5	310	8	1	6	4	19	55	0	5	21	0	0	0
8975	12504	23954	3	1	7.21424	1	90	82	100	2	110	97	7.5	1	3	190	83	87	92	82	73	12.5	18	-5	0	0	-7	-14	15.4545	18	1	2	2	2	3	5	300	8	1	5	4	5	61	31	0	3	0	0	0
8976	12503	23954	2	0	7.21424	0	104	103	103	3	112	109	0	1	1	185	95	104	97	97	82	15	24	17	7	10	24	11	14.2683	2	1	1	2	1	4	5	310	8	1	6	4	19	55	0	5	21	0	0	0
8976	12503	23954	2	0	7.21424	0	104	103	103	3	112	109	0	1	2	147	95	104	97	97	82	15	24	-2	-8	10	-22	3	-22.4501	2	1	1	2	1	4	5	310	8	1	6	4	19	55	0	5	21	0	0	0
8976	12504	23954	3	1	7.21424	0	104	103	103	3	112	109	0	1	3	190	95	104	97	97	82	15	24	15	1	1	32	7	37.6263	2	1	2	2	2	3	5	300	8	1	5	4	5	61	31	0	3	0	0	0
8977	12503	23954	2	0	7.05544	0	102	102	101	2	95	96		1	1	185	107	91	110	100	100	10	16	-12	5	-15	3	-18	-0.243902	10	1	1	2	1	4	5	310	8	1	6	4	19	55	0	5	21	0	0	0
8977	12503	23954	2	0	7.05544	0	102	102	101	2	95	96		1	2		107	91	110	100	100	10	16								1	1	2	1	4	5	310	8	1	6	4	19	55	0	5	21	0	0	0
8977	12378	23945			7.05544	0	102	102	101	2	95	96		1	3		107	91	110	100	100	10	16
8978	12503	23954	2	0	7.56742	0	88	79	100	2	103	101	9	1	1	179	83	73	90	81	77	22.5	14	-1	2	1	-5	3	-10.3049	-4	1	1	2	1	4	5	310	8	1	6	4	19	55	0	5	21	0	0	0
8978	12503	23954	2	0	7.56742	0	88	79	100	2	103	101	9	1	2	148	83	73	90	81	77	22.5	14	4	0	-1	10	0	-7.64967	2	1	1	2	1	4	5	310	8	1	6	4	19	55	0	5	21	0	0	0
8978	12504	23954	3	1	7.56742	0	88	79	100	2	103	101	7	1	3	189	83	73	90	81	77	22.5	14	-3	-9	-5	-2	8	24.3434	-4	1	2	2	2	3	5	300	8	1	5	4	5	61	31	0	3	0	0	0
8979	12503	23954	2	0	6.87474	0	95	99	92	3	93	96	3	1	1	185	83	89	91	82	88	20	12	17	-9	10	21	-2	4.39024	8	1	1	2	1	4	5	310	8	1	6	4	19	55	0	5	21	0	0	0
8979	12503	23954	2	0	6.87474	0	95	99	92	3	93	96	3	1	2	147	83	89	91	82	88	20	12	-6	1	-9	-3	7	-17.5721	-6	1	1	2	1	4	5	310	8	1	6	4	19	55	0	5	21	0	0	0
8979	12504	23954	3	1	6.87474	0	95	99	92	3	93	96	3.5	1	3	190	83	89	91	82	88	20	12	4	9	6	1	2	8.73737	16	1	2	2	2	3	5	300	8	1	5	4	5	61	31	0	3	0	0	0
8980	12503	23954	2	0	7.18412	1				2	104	106	19.5	1	1	185	104	96	99	115	95	17.5	24	-6	6	4	-22	-1	-2.86585	0	1	1	2	1	4	5	310	8	1	6	4	19	55	0	5	21	0	0	0
8980	12503	23954	2	0	7.18412	1				2	104	106	19.5	1	2	146	104	96	99	115	95	17.5	24	12	-9	17	2	1	-7.81596	-10	1	1	2	1	4	5	310	8	1	6	4	19	55	0	5	21	0	0	0
8980	12623	23954	3	-1	7.18412	1				2	104	106	3.5	1	3	191	104	96	99	115	95	17.5	24	-8	1	-15	6	-4	8.73737	22	1	2	1	1	4		260		0	5	4	0	9	43	3	43	2	0	0
8981	12503	23954	2	0	7.47159	0	87	82	95	0	97	96	24	1	1	185	78	83	88	76	70	7.5	16	11	2	5	13	11	19.3293	4	1	1	2	1	4	5	310	8	1	6	4	19	55	0	5	21	0	0	0
8981	12503	23954	2	0	7.47159	0	87	82	95	0	97	96	24	1	2	146	78	83	88	76	70	7.5	16	-13	-2	4	-36	-7	-24.5565	-10	1	1	2	1	4	5	310	8	1	6	4	19	55	0	5	21	0	0	0
8981	12623	23954	3	-1	7.47159	0	87	82	95	0	97	96	27.5	1	3	191	78	83	88	76	70	7.5	16	14	5	4	28	2	-0.0505051	14	1	2	1	1	4		260		0	5	4	0	9	43	3	43	2	0	0
8983	12504	23954	5	-1	9.96851	1	86	102	73	1	109	94		1	1	181	59	82	60	69	74	6.81818	10	7	-1	10	0	5	-3.24675	4	1	1	2	2	3	5	300	8	1	6	5	11	38	0	0	51	0	0	31
8983	12504	23954	5	-1	9.96851	1	86	102	73	1	109	94		1	2		59	82	60	69	74	6.81818	10								1	1	2	2	3	5	300	8	1	6	5	11	38	0	0	51	0	0	31
8983	12378	23945			9.96851	1	86	102	73	1	109	94		1	3		59	82	60	69	74	6.81818	10
8984	12504	23954	5	-1	9.86995	1	94	97	92	3	97	98	85.5	1	1	183	72	87	85	66	68	5.68182	10	2	0	8	-9	2	-4.49134	4	1	1	2	2	3	5	300	8	1	6	5	11	38	0	0	51	0	0	31
8984	12504	23954	5	-1	9.86995	1	94	97	92	3	97	98	85.5	1	2	145	72	87	85	66	68	5.68182	10	-4	0	-10	10	-4	16.4566	-12	1	1	2	2	3	5	300	8	1	6	5	11	38	0	0	51	0	0	31
8984	12624	23954	6	1	9.86995	1	94	97	92	3	97	98	13	1	3	190	72	87	85	66	68	5.68182	10	-6	5	-2	-12	-1	-8.36871	2	0	2	2	1	4	5	250	5	1	5	4	0	27	44	0	29	0	0	29
8985	12504	23954	5	-1	10.5818	0	102	114	89	3	111	108	25.5	1	1	182	85	86	92	83	79	13.6364	10	-6	4	1	-11	-6	7.79221	16	1	1	2	2	3	5	300	8	1	6	5	11	38	0	0	51	0	0	31
8985	12504	23954	5	-1	10.5818	0	102	114	89	3	111	108	25.5	1	2	147	85	86	92	83	79	13.6364	10	9	2	3	15	6	-10.6443	-18	1	1	2	2	3	5	300	8	1	6	5	11	38	0	0	51	0	0	31
8985	12624	23954	6	1	10.5818	0	102	114	89	3	111	108	12	1	3	189	85	86	92	83	79	13.6364	10	2	6	7	-9	5	13.958	2	0	2	2	1	4	5	250	5	1	5	4	0	27	44	0	29	0	0	29
8986	12504	23954	5	-1	10.1711	0	97	92	103	2	97	102	30	1	1	183	87	97	97	79	83	2.27273	18	15	2	15	17	5	22.7273	12	1	1	2	2	3	5	300	8	1	6	5	11	38	0	0	51	0	0	31
8986	12504	23954	5	-1	10.1711	0	97	92	103	2	97	102	30	1	2	144	87	97	97	79	83	2.27273	18	0	-1	0	-2	3	-9.31373	-16	1	1	2	2	3	5	300	8	1	6	5	11	38	0	0	51	0	0	31
8986	12624	23954	6	1	10.1711	0	97	92	103	2	97	102	4	1	3	191	87	97	97	79	83	2.27273	18	4	-1	8	-4	1	12.1488	12	0	2	2	1	4	5	250	5	1	5	4	0	27	44	0	29	0	0	29
8987	12504	23954	5	-1	9.9384	1	93	105	82	5	102	100	25.5	1	1	182	75	89	87	74	60	7.95455	2	-1	3	11	-23	12	12.2835	16	1	1	2	2	3	5	300	8	1	6	5	11	38	0	0	51	0	0	31
8987	12504	23954	5	-1	9.9384	1	93	105	82	5	102	100	25.5	1	2	146	75	89	87	74	60	7.95455	2	8	2	-7	30	0	-4.55182	-14	1	1	2	2	3	5	300	8	1	6	5	11	38	0	0	51	0	0	31
8987	12624	23954	6	1	9.9384	1	93	105	82	5	102	100	13	1	3	184	75	89	87	74	60	7.95455	2	-3	-3	1	-10	6	-1.25328	4	0	2	2	1	4	5	250	5	1	5	4	0	27	44	0	29	0	0	29
8988	12504	23954	5	-1	10.0808	1	93	98	89	2	111	127	55.5	1	1	182	86	100	93	84	79	12.5	14	4	3	4	-1	13	-5.35714	10	1	1	2	2	3	5	300	8	1	6	5	11	38	0	0	51	0	0	31
8988	12504	23954	5	-1	10.0808	1	93	98	89	2	111	127	55.5	1	2	146	86	100	93	84	79	12.5	14	-4	-2	1	-3	-15	13.4454	-14	1	1	2	2	3	5	300	8	1	6	5	11	38	0	0	51	0	0	31
8988	12624	23954	6	1	10.0808	1	93	98	89	2	111	127	8	1	3	190	86	100	93	84	79	12.5	14	4	1	8	-3	6	8.27774	2	0	2	2	1	4	5	250	5	1	5	4	0	27	44	0	29	0	0	29
8990	12504	23954	5	-1	10.4586	1	97	109	86	2	111	118	18	1	1	182	78	96	87	73	80	3.40909	2	8	4	4	10	3	10.8766	14	1	1	2	2	3	5	300	8	1	6	5	11	38	0	0	51	0	0	31
8990	12504	23954	5	-1	10.4586	1	97	109	86	2	111	118	18	1	2	145	78	96	87	73	80	3.40909	2	-1	-5	5	-5	-3	-4.48179	-14	1	1	2	2	3	5	300	8	1	6	5	11	38	0	0	51	0	0	31
8990	12624	23954	6	1	10.4586	1	97	109	86	2	111	118	10	1	3	191	78	96	87	73	80	3.40909	2	3	5	2	0	9	3.59814	8	0	2	2	1	4	5	250	5	1	5	4	0	27	44	0	29	0	0	29
8991	12504	23954	5	-1	10.1629	1	111	115	103	6	118	114	24	1	1	182	73	92	83	71	67	6.81818	6	17	5	20	11	10	5.08658	18	1	1	2	2	3	5	300	8	1	6	5	11	38	0	0	51	0	0	31
8991	12504	23954	5	-1	10.1629	1	111	115	103	6	118	114	24	1	2	145	73	92	83	71	67	6.81818	6	-8	4	-2	-21	8	2.80112	-18	1	1	2	2	3	5	300	8	1	6	5	11	38	0	0	51	0	0	31
8991	12624	23954	6	1	10.1629	1	111	115	103	6	118	114	8	1	3	191	73	92	83	71	67	6.81818	6	9	9	-2	19	12	1.78896	4	0	2	2	1	4	5	250	5	1	5	4	0	27	44	0	29	0	0	29
8992	12504	23954	5	-1	10.1273	1	113	119	103	3	107	100	33	1	1	182	90	109	99	83	80	19.3182	12	-3	-8	-2	-4	2	9.25325	6	1	1	2	2	3	5	300	8	1	6	5	11	38	0	0	51	0	0	31
8992	12504	23954	5	-1	10.1273	1	113	119	103	3	107	100	33	1	2	145	90	109	99	83	80	19.3182	12	2	6	2	1	4	-6.02241	-12	1	1	2	2	3	5	300	8	1	6	5	11	38	0	0	51	0	0	31
8992	12624	23954	6	1	10.1273	1	113	119	103	3	107	100	14	1	3	199	90	109	99	83	80	19.3182	12	19	-6	25	14	-2	3.22418	18	0	2	2	1	4	5	250	5	1	5	4	0	27	44	0	29	0	0	29
8993	12504	23954	5	-1	10.4832	0	71	66	84	3	93	96		1	1	182	67	68	76	69	67	0	6	-1	4	6	-12	3	13.0952	6	1	1	2	2	3	5	300	8	1	6	5	11	38	0	0	51	0	0	31
8993	12504	23954	5	-1	10.4832	0	71	66	84	3	93	96		1	2		67	68	76	69	67	0	6								1	1	2	2	3	5	300	8	1	6	5	11	38	0	0	51	0	0	31
8993	12378	23945			10.4832	0	71	66	84	3	93	96		1	3		67	68	76	69	67	0	6
8994	12504	23954	5	-1	10.0534	1	100	92	108	4	111	98		1	1	183	85	101	95	80	74	17.0455	4					10	0.811688		1	1	2	2	3	5	300	8	1	6	5	11	38	0	0	51	0	0	31
8994	12504	23954	5	-1	10.0534	1	100	92	108	4	111	98		1	2		85	101	95	80	74	17.0455	4								1	1	2	2	3	5	300	8	1	6	5	11	38	0	0	51	0	0	31
8994	12378	23945			10.0534	1	100	92	108	4	111	98		1	3		85	101	95	80	74	17.0455	4
8995	12504	23954	5	-1	10.1766	0	111	111	107	7	93	102	0	1	1	182	99	104	110	86	97	6.81818	18	4	-2	-1	10	-1	22.9437	16	1	1	2	2	3	5	300	8	1	6	5	11	38	0	0	51	0	0	31
8995	12504	23954	5	-1	10.1766	0	111	111	107	7	93	102	0	1	2	145	99	104	110	86	97	6.81818	18	24	16	14	30	14	-14.0756	4	1	1	2	2	3	5	300	8	1	6	5	11	38	0	0	51	0	0	31
8995	12624	23954	6	1	10.1766	0	111	111	107	7	93	102	0	1	3	191	99	104	110	86	97	6.81818	18	-5	1	-3	-8	0	-9.50071	-6	0	2	2	1	4	5	250	5	1	5	4	0	27	44	0	29	0	0	29
8997	12504	23954	5	-1	9.82888	0	106	102	108	3	76	86	3	1	1	182	91	107	102	83	84	12.5	10	-6	-2	-6	-9	3	-1.78571	10	1	1	2	2	3	5	300	8	1	6	5	11	38	0	0	51	0	0	31
8997	12504	23954	5	-1	9.82888	0	106	102	108	3	76	86	3	1	2	146	91	107	102	83	84	12.5	10	15	2	11	19	9	-2.87115	-14	1	1	2	2	3	5	300	8	1	6	5	11	38	0	0	51	0	0	31
8997	12624	23954	6	1	9.82888	0	106	102	108	3	76	86	6	1	3	190	91	107	102	83	84	12.5	10	-3	9	-4	-4	6	0.404285	6	0	2	2	1	4	5	250	5	1	5	4	0	27	44	0	29	0	0	29
8998	12505	23955	5	1	10.1821	0	90	90	93	3	109	94	15.5	1	1	192	85	98	101	71	76		16	-8	4	-7	-8	-3		0	1	1	2	1	4	5	300	8	1	4	4	0	46	0	0	54	0	0	54
8998	12505	23955	5	1	10.1821	0	90	90	93	3	109	94	15.5	1	2	140	85	98	101	71	76		16	3	-4	1	6	4	-1.13636	-4	1	1	2	1	4	5	300	8	1	4	4	0	46	0	0	54	0	0	54
8998	12626	23955	6	0	10.1821	0	90	90	93	3	109	94	27.5	1	3	188	85	98	101	71	76		16					1	7.21649	-12	1	2	2	3	3	5	300	6	1	6	4	0	54	0	0	39	7	0	46
8999	12505	23955	5	1	10.1547	0	77	82	78	3	91	97	11.5	1	1	192	78	80	83	83	76	14.2857	8	-3	5	0	-12	4	-4.05844	0	1	1	2	1	4	5	300	8	1	4	4	0	46	0	0	54	0	0	54
8999	12505	23955	5	1	10.1547	0	77	82	78	3	91	97	11.5	1	2	137	78	80	83	83	76	14.2857	8	5	-2	12	-1	-5	-2.38414	2	1	1	2	1	4	5	300	8	1	4	4	0	46	0	0	54	0	0	54
8999	12627	23955	6	1	10.1547	0	77	82	78	3	91	97	11.5	1	3	191	78	80	83	83	76	14.2857	8	-12	-1	-12	-12	3	7.84314	2	1	2	2	2	3	5	300		1	6	4	4	44	0	0	52	0	0	52
9000	12505	23955	5	1	10.5435	1	86	86	89	5	93	94	1	1	1	192	80	96	93	69	83	15.4762	22	0	-9	0	0	0	6.11472	-6	1	1	2	1	4	5	300	8	1	4	4	0	46	0	0	54	0	0	54
9000	12505	23955	5	1	10.5435	1	86	86	89	5	93	94	1	1	2	139	80	96	93	69	83	15.4762	22	11	4	11	2	22		-6	1	1	2	1	4	5	300	8	1	4	4	0	46	0	0	54	0	0	54
9000	12626	23955	6	0	10.5435	1	86	86	89	5	93	94	6.5	1	3	189	80	96	93	69	83	15.4762	22	-1	2	-3	10	-23		8	1	2	2	3	3	5	300	6	1	6	4	0	54	0	0	39	7	0	46
9001	12505	23955	5	1	9.90554	0	120	129	105	5	118	122	12.5	1	1	192	114	115	116	104	110	30.9524	36	3	3	-1	2	10	7.68398	-2	1	1	2	1	4	5	300	8	1	4	4	0	46	0	0	54	0	0	54
9001	12505	23955	5	1	9.90554	0	120	129	105	5	118	122	12.5	1	2	138	114	115	116	104	110	30.9524	36	-3	4	3	-7	-6	-8.24421	-14	1	1	2	1	4	5	300	8	1	4	4	0	46	0	0	54	0	0	54
9001	12626	23955	6	0	9.90554	0	120	129	105	5	118	122	14	1	3	190	114	115	116	104	110	30.9524	36	6	-5	0	10	5	8.7831	0	1	2	2	3	3	5	300	6	1	6	4	0	54	0	0	39	7	0	46
9002	12505	23955	5	1	9.83436	0	96	94	98	2	93	87	17	1	1	192	76	80	91	66	72	0	8	1	14	0	4	-2	9.09091	6	1	1	2	1	4	5	300	8	1	4	4	0	46	0	0	54	0	0	54
9002	12505	23955	5	1	9.83436	0	96	94	98	2	93	87	17	1	2	138	76	80	91	66	72	0	8	4	0	14	-11	1	-8.11052	-6	1	1	2	1	4	5	300	8	1	4	4	0	46	0	0	54	0	0	54
9002	12626	23955	6	0	9.83436	0	96	94	98	2	93	87	18.5	1	3	190	76	80	91	66	72	0	8	0	-2	-7	8	5	-0.980392	2	1	2	2	3	3	5	300	6	1	6	4	0	54	0	0	39	7	0	46
9003	12505	23955	5	1	10.5818	0	86	88	87	4	80	91	16.5	1	1	192	77	82	92	68	70	5.95238	8	0	-1	-5	11	-6	-4.81602	6	1	1	2	1	4	5	300	8	1	4	4	0	46	0	0	54	0	0	54
9003	12505	23955	5	1	10.5818	0	86	88	87	4	80	91	16.5	1	2	139	77	82	92	68	70	5.95238	8	0	2	9	-13	-2	1.80481	-4	1	1	2	1	4	5	300	8	1	4	4	0	46	0	0	54	0	0	54
9003	12626	23955	6	0	10.5818	0	86	88	87	4	80	91	8	1	3	189	77	82	92	68	70	5.95238	8	5	4	0	11	8	6.33717	8	1	2	2	3	3	5	300	6	1	6	4	0	54	0	0	39	7	0	46
9004	12505	23955	5	1	10.1081	1	92	81	105	6	109	114	5.5	1	1	192	84	89	97	76	74	4.7619	10	3	24	9	-8	8	-3.62554	8	1	1	2	1	4	5	300	8	1	4	4	0	46	0	0	54	0	0	54
9004	12505	23955	5	1	10.1081	1	92	81	105	6	109	114	5.5	1	2	137	84	89	97	76	74	4.7619	10	-6	-8	-13	2	4	10.6283	-8	1	1	2	1	4	5	300	8	1	4	4	0	46	0	0	54	0	0	54
9004	12626	23955	6	0	10.1081	1	92	81	105	6	109	114	14	1	3	191	84	89	97	76	74	4.7619	10	6	0	2	10	0	6.792	4	1	2	2	3	3	5	300	6	1	6	4	0	54	0	0	39	7	0	46
9005	12505	23955	5	1	10.3107	0	93	106	82	2	90	87		1	1	192	61	62	79	47	72	3.57143	10	-13	-6	-5	-25	-3	3.24675	2	1	1	2	1	4	5	300	8	1	4	4	0	46	0	0	54	0	0	54
9005	12505	23955	5	1	10.3107	0	93	106	82	2	90	87		1	2		61	62	79	47	72	3.57143	10								1	1	2	1	4	5	300	8	1	4	4	0	46	0	0	54	0	0	54
9005	12378	23945			10.3107	0	93	106	82	2	90	87		1	3		61	62	79	47	72	3.57143	10
9006	12505	23955	5	1	10.3628	0	111	103	115	4	104	100	15.5	1	1	192	90	104	103	78	84	2.38095	16	6	5	6	10	-2	22.619	8	1	1	2	1	4	5	300	8	1	4	4	0	46	0	0	54	0	0	54
9006	12505	23955	5	1	10.3628	0	111	103	115	4	104	100	15.5	1	2	137	90	104	103	78	84	2.38095	16	-2	-5	0	-6	1	-13.2353	-8	1	1	2	1	4	5	300	8	1	4	4	0	46	0	0	54	0	0	54
9006	12626	23955	6	0	10.3628	0	111	103	115	4	104	100	9.5	1	3	191	90	104	103	78	84	2.38095	16	3	-1	1	3	3	4.73014	12	1	2	2	3	3	5	300	6	1	6	4	0	54	0	0	39	7	0	46
9007	12505	23955	5	1	9.95209	0	72	64	88	1	91	86	9.5	1	1	192	85	91	95	73	90	23.8095	12	-7	-5	3	-8	-28	-14.7186	6	1	1	2	1	4	5	300	8	1	4	4	0	46	0	0	54	0	0	54
9007	12505	23955	5	1	9.95209	0	72	64	88	1	91	86	9.5	1	2	138	85	91	95	73	90	23.8095	12	4	0	0	6	12	5.61497	-6	1	1	2	1	4	5	300	8	1	4	4	0	46	0	0	54	0	0	54
9007	12626	23955	6	0	9.95209	0	72	64	88	1	91	86	8	1	3	190	85	91	95	73	90	23.8095	12	6	0	-2	10	15	-10.5822	6	1	2	2	3	3	5	300	6	1	6	4	0	54	0	0	39	7	0	46
9008	12555	23975	2	-1	6.91581	1	103	107	98	4	95	103	9	0	1	173	95	123	95	97	100	20	18	7	-5	15	-5	-6	-10.2439	-4	1	1	2	1	3	5	400	8	0	6	4	0	41	9	0	46	4	0	0
9008	12555	23975	2	-1	6.91581	1	103	107	98	4	95	103	9	0	2	137	95	123	95	97	100	20	18	-3	-5	-7	5	-3	-7.53388	-4	1	1	2	1	3	5	400	8	0	6	4	0	41	9	0	46	4	0	0
9008	12668	23975	3	0	6.91581	1	103	107	98	4	95	103	16	0	3	181	95	123	95	97	100	20	18	-5	-4	2	-13	-10	6.86869	4	1	2	1	4	4	5	450
9009	12555	23975	2	-1	7.57563	1	119	110	123	4	98	95		0	1	187	89	96	89	98	76	10	16	8	6	16	-6	7	4.63415	14	1	1	2	1	3	5	400	8	0	6	4	0	41	9	0	46	4	0	0
9009	12555	23975	2	-1	7.57563	1	119	110	123	4	98	95		0	2		89	96	89	98	76	10	16								1	1	2	1	3	5	400	8	0	6	4	0	41	9	0	46	4	0	0
9009	12378	23945			7.57563	1	119	110	123	4	98	95		0	3		89	96	89	98	76	10	16
9010	12555	23975	2	-1	6.72964	0	103	101	103	2	89	94	10	0	1	188	83	107	96	78	83	7.5	10	13	-2	5	19	-5	2.2561	0	1	1	2	1	3	5	400	8	0	6	4	0	41	9	0	46	4	0	0
9010	12555	23975	2	-1	6.72964	0	103	101	103	2	89	94	10	0	2	136	83	107	96	78	83	7.5	10	-2	1	-8	3	7	8.02168	0	1	1	2	1	3	5	400	8	0	6	4	0	41	9	0	46	4	0	0
9010	12668	23975	3	0	6.72964	0	103	101	103	2	89	94	11	0	3	181	83	107	96	78	83	7.5	10	5	-1	19	-8	-15	4.44444	0	1	2	1	4	4	5	450
9011	12555	23975	2	-1	7.50992	0	105	94	114	4	100	105	5	0	1	188	96	114	102	86	108	27.5	30	5	6	10	2	-16	-3.10976	-2	1	1	2	1	3	5	400	8	0	6	4	0	41	9	0	46	4	0	0
9011	12555	23975	2	-1	7.50992	0	105	94	114	4	100	105	5	0	2	135	96	114	102	86	108	27.5	30	8	3	14	-1	-4	-13.0266	0	1	1	2	1	3	5	400	8	0	6	4	0	41	9	0	46	4	0	0
9011	12668	23975	3	0	7.50992	0	105	94	114	4	100	105	4	0	3	182	96	114	102	86	108	27.5	30	-13	-18	-21	2	-1	-0.252525	-6	1	2	1	4	4	5	450
9012	12555	23975	2	-1	7.13758	1	114	110	114	3	127	121	19	0	1	188	92	113	93	98	73	12.5	10	-10	-1	3	-32	1	-2.7439	6	1	1	2	1	3	5	400	8	0	6	4	0	41	9	0	46	4	0	0
9012	12555	23975	2	-1	7.13758	1	114	110	114	3	127	121	19	0	2	135	92	113	93	98	73	12.5	10	3	0	-3	13	5	-0.665188	-4	1	1	2	1	3	5	400	8	0	6	4	0	41	9	0	46	4	0	0
9012	12668	23975	3	0	7.13758	1	114	110	114	3	127	121		0	3		92	113	93	98	73	12.5	10								1	2	1	4	4	5	450
9013	12555	23975	2	-1	6.88296	1	89	87	94	3	104	110	0.5	0	1	196	96	107	96	103	76	15	12	-8	-3	-12	-5	11	-7.68293	10	1	1	2	1	3	5	400	8	0	6	4	0	41	9	0	46	4	0	0
9013	12555	23975	2	-1	6.88296	1	89	87	94	3	104	110	0.5	0	2	128	96	107	96	103	76	15	12	-4	-4	1	-10	-2	-5.09485	-4	1	1	2	1	3	5	400	8	0	6	4	0	41	9	0	46	4	0	0
9013	12668	23975	3	0	6.88296	1	89	87	94	3	104	110	0	0	3	181	96	107	96	103	76	15	12	4	1	5	2	5	2.32323	-6	1	2	1	4	4	5	450
9014	12555	23975	2	-1	7.21697	1	112	112	108	3	108	110		0	1	188	94	104	92	107	73	7.5	12	3	3	4	-5	14	9.57317	-2	1	1	2	1	3	5	400	8	0	6	4	0	41	9	0	46	4	0	0
9014	12555	23975	2	-1	7.21697	1	112	112	108	3	108	110		0	2		94	104	92	107	73	7.5	12								1	1	2	1	3	5	400	8	0	6	4	0	41	9	0	46	4	0	0
9014	12378	23945			7.21697	1	112	112	108	3	108	110		0	3		94	104	92	107	73	7.5	12
9015	12556	23975	2	1	7.59206	0	92	82	104	2	105	105		0	1	188	113	113	115	103	105	24.3902	34	2	-3	-1	6	3	30.6098	0	1	1	2	1	4	5	300	8
9015	12556	23975	2	1	7.59206	0	92	82	104	2	105	105		0	2		113	113	115	103	105	24.3902	34								1	1	2	1	4	5	300	8
9015	12378	23945			7.59206	0	92	82	104	2	105	105		0	3		113	113	115	103	105	24.3902	34
9016	12556	23975	2	1	7.28542	1	95	100	91	2	103	103	2	0	1	188	107	113	103	111	105	36.5854	22	-6	-4	-5	-6	-7	-14.0854	4	1	1	2	1	4	5	300	8
9016	12556	23975	2	1	7.28542	1	95	100	91	2	103	103	2	0	2	135	107	113	103	111	105	36.5854	22	-1	2	10	-10	-16	-13.4091	-2	1	1	2	1	4	5	300	8
9016	12668	23975	3	0	7.28542	1	95	100	91	2	103	103	8	0	3	182	107	113	103	111	105	36.5854	22	8	-1	8	1	17	39.798	2	1	2	1	4	4	5	450
9017	12556	23975	2	1	6.93771	0	117	105	123	1	106	116	13	0	1	188	101	120	108	92	105	7.31707	22	9	-1	6	15	-21	27.6829	8	1	1	2	1	4	5	300	8
9017	12556	23975	2	1	6.93771	0	117	105	123	1	106	116	13	0	2	136	101	120	108	92	105	7.31707	22	-7	-4	-12	-2	16	-17.2222	-16	1	1	2	1	4	5	300	8
9017	12668	23975	3	0	6.93771	0	117	105	123	1	106	116	8	0	3	181	101	120	108	92	105	7.31707	22	3	-4	7	-4	1	11.7677	10	1	2	1	4	4	5	450
9018	12588	23956	2	0	6.72416	0	89	87	94	2	105	93		1	1	184	80	67	85	85	80	0	6	-14	-6	-16	-12	-2	5	4	1	1	2	2	4	5	250	8	1	6	5	2	78	0	3	17	0	0	17
9018	12588	23956	2	0	6.72416	0	89	87	94	2	105	93		1	2		80	67	85	85	80	0	6								1	1	2	2	4	5	250	8	1	6	5	2	78	0	3	17	0	0	17
9018	12378	23945			6.72416	0	89	87	94	2	105	93		1	3		80	67	85	85	80	0	6
9019	12588	23956	2	0	7.04449	1	93	97	88	4	114	111	2	1	1	184	88	103	97	86	75	4.87805	8	12	4	2	19	20	25.122	6	1	1	2	2	4	5	250	8	1	6	5	2	78	0	3	17	0	0	17
9019	12588	23956	2	0	7.04449	1	93	97	88	4	114	111	2	1	2	131	88	103	97	86	75	4.87805	8	-9	-3	-9	-7	-12	-30	-6	1	1	2	2	4	5	250	8	1	6	5	2	78	0	3	17	0	0	17
9019	12628	23956	3	1	7.04449	1	93	97	88	4	114	111	4	1	3	195	88	103	97	86	75	4.87805	8	-9	-6	-3	-17	-6	22.2222	18	1	2	2	1	4	5	250	5	1	1	4	9	87	0	0	4	0	0	3
9021	12588	23956	2	0	7.09925	1	114	122	102	3	106	108		1	1	184	113	111	110	117	91	7.31707	14	-2	-1	9	-14	-9	2.68293	18	1	1	2	2	4	5	250	8	1	6	5	2	78	0	3	17	0	0	17
9021	12588	23956	2	0	7.09925	1	114	122	102	3	106	108		1	2		113	111	110	117	91	7.31707	14								1	1	2	2	4	5	250	8	1	6	5	2	78	0	3	17	0	0	17
9021	12378	23945			7.09925	1	114	122	102	3	106	108		1	3		113	111	110	117	91	7.31707	14
9022	12588	23956	2	0	6.9076	0	103	122	82	2	100	95	0	1	1	184	94	110	94	91	111	14.6341	4	12	-3	9	16	-7	7.86585	14	1	1	2	2	4	5	250	8	1	6	5	2	78	0	3	17	0	0	17
9022	12588	23956	2	0	6.9076	0	103	122	82	2	100	95	0	1	2	131	94	110	94	91	111	14.6341	4	-13	1	-8	-20	3	-13.4091	-10	1	1	2	2	4	5	250	8	1	6	5	2	78	0	3	17	0	0	17
9022	12628	23956	3	1	6.9076	0	103	122	82	2	100	95	0	1	3	195	94	110	94	91	111	14.6341	4	10	-5	16	5	-5	13.1313	12	1	2	2	1	4	5	250	5	1	1	4	9	87	0	0	4	0	0	3
9023	12588	23956	2	0	6.74059	0	95	99	92	2	104	92	11.5	1	1	184	105	93	102	106	104	12.1951	10	12	5	18	-1	-1	12.8049	2.5	1	1	2	2	4	5	250	8	1	6	5	2	78	0	3	17	0	0	17
9023	12588	23956	2	0	6.74059	0	95	99	92	2	104	92	11.5	1	2	131	105	93	102	106	104	12.1951	10	-5	-1	-1	-2	-16	-16.1111	-0.5	1	1	2	2	4	5	250	8	1	6	5	2	78	0	3	17	0	0	17
9023	12587	23956	3	0	6.74059	0	95	99	92	2	104	92	5	1	3	195	105	93	102	106	104	12.1951	10	-1	2	-5	1	10	16.1111	10	1	2	2	2	3	5	250	8	1	4	4	0	62	0	0	38	0	0	38
9024	12588	23956	2	0	7.04175	0	105	110	98	2	95	103	8.5	1	1	184	97	84	97	100	90	4.87805	20	-7	3	-1	-14	1	15.122	-2	1	1	2	2	4	5	250	8	1	6	5	2	78	0	3	17	0	0	17
9024	12588	23956	2	0	7.04175	0	105	110	98	2	95	103	8.5	1	2	130	97	84	97	100	90	4.87805	20	-2	-13	3	-7	-13	-10.9091	0	1	1	2	2	4	5	250	8	1	6	5	2	78	0	3	17	0	0	17
9024	12628	23956	3	1	7.04175	0	105	110	98	2	95	103	9.5	1	3	196	97	84	97	100	90	4.87805	20	-3	4	0	-2	-17	-9.09091	-8	1	2	2	1	4	5	250	5	1	1	4	9	87	0	0	4	0	0	3
9025	12588	23956	2	0	7.21424	0	99	105	93	3	106	110	11.5	1	1	184	99	106	101	97	102	19.5122	10	15	2	13	10	5	12.9878	16	1	1	2	2	4	5	250	8	1	6	5	2	78	0	3	17	0	0	17
9025	12588	23956	2	0	7.21424	0	99	105	93	3	106	110	11.5	1	2	130	99	106	101	97	102	19.5122	10	-1	-5	0	6	-17	-5.83333	-16	1	1	2	2	4	5	250	8	1	6	5	2	78	0	3	17	0	0	17
9025	12587	23956	3	0	7.21424	0	99	105	93	3	106	110	11	1	3	214	99	106	101	97	102	19.5122	10	-2	1	-1	-9	13	16.5152	18	1	2	2	2	3	5	250	8	1	4	4	0	62	0	0	38	0	0	38
9026	12588	23956	2	0	7.48528	0	93	100	88	3	97	83	8	1	1	184	78	89	77	88	82	12.1951	6	4	0	9	-5	2	10.3049	20	1	1	2	2	4	5	250	8	1	6	5	2	78	0	3	17	0	0	17
9026	12588	23956	2	0	7.48528	0	93	100	88	3	97	83	8	1	2	130	78	89	77	88	82	12.1951	6	-6	-3	-6	-5	-8	-20.2778	-12	1	1	2	2	4	5	250	8	1	6	5	2	78	0	3	17	0	0	17
9026	12587	23956	3	0	7.48528	0	93	100	88	3	97	83	5	1	3	196	78	89	77	88	82	12.1951	6	11	2	18	-2	5	13.6869	8	1	2	2	2	3	5	250	8	1	4	4	0	62	0	0	38	0	0	38
9027	12588	23956	2	0	6.96509	0	102	107	96	2	97	99		1	1	184	89	72	89	92	93	9.7561	18	1	11	5	0	-13	5.2439	2	1	1	2	2	4	5	250	8	1	6	5	2	78	0	3	17	0	0	17
9027	12588	23956	2	0	6.96509	0	102	107	96	2	97	99		1	2		89	72	89	92	93	9.7561	18								1	1	2	2	4	5	250	8	1	6	5	2	78	0	3	17	0	0	17
9027	12378	23945			6.96509	0	102	107	96	2	97	99		1	3		89	72	89	92	93	9.7561	18
9028	12588	23956	2	0	7.57837	0	77	79	82	2	89	79	9.5	1	1	184	80	56	96	67	78	2.43902	10	19	7	1	32	28	25.061	4	1	1	2	2	4	5	250	8	1	6	5	2	78	0	3	17	0	0	17
9028	12588	23956	2	0	7.57837	0	77	79	82	2	89	79	9.5	1	2	132	80	56	96	67	78	2.43902	10	-2	-2	-1	-1	-6	-22.9545	-4	1	1	2	2	4	5	250	8	1	6	5	2	78	0	3	17	0	0	17
9028	12628	23956	3	1	7.57837	0	77	79	82	2	89	79	13	1	3	194	80	56	96	67	78	2.43902	10	-9	3	-5	-11	-7	8.78788	0	1	2	2	1	4	5	250	5	1	1	4	9	87	0	0	4	0	0	3
9030	12588	23956	2	0	7.35113	0	101	103	98	2	55	57	3	1	1	184	74	67	79	80	67	7.31707	10	-6	1	-4	-12	2	-2.31707	4	1	1	2	2	4	5	250	8	1	6	5	2	78	0	3	17	0	0	17
9030	12588	23956	2	0	7.35113	0	101	103	98	2	55	57	3	1	2	130	74	67	79	80	67	7.31707	10	3	-14	-1	12	-6	-2.77778	-4	1	1	2	2	4	5	250	8	1	6	5	2	78	0	3	17	0	0	17
9030	12587	23956	3	0	7.35113	0	101	103	98	2	55	57	3.5	1	3	196	74	67	79	80	67	7.31707	10	-6	5	-1	-13	2	2.32323	2	1	2	2	2	3	5	250	8	1	4	4	0	62	0	0	38	0	0	38
9031	12588	23956	2	0	7.19781	0	81	85	82	2	101	105	6	1	1	184	101	114	102	104	90	12.1951	4	-6	-1	-12	3	-2	20.3049	10	1	1	2	2	4	5	250	8	1	6	5	2	78	0	3	17	0	0	17
9031	12588	23956	2	0	7.19781	0	81	85	82	2	101	105	6	1	2	130	101	114	102	104	90	12.1951	4	2	-4	8	-2	-13	-27.9545	-6	1	1	2	2	4	5	250	8	1	6	5	2	78	0	3	17	0	0	17
9031	12628	23956	3	1	7.19781	0	81	85	82	2	101	105	0	1	3	196	101	114	102	104	90	12.1951	4	-7	-3	-3	-17	11	44.3434	12	1	2	2	1	4	5	250	5	1	1	4	9	87	0	0	4	0	0	3
9032	12588	23956	2	0	6.96783	1	111	116	103	4	89	99	3.5	1	1	184	93	89	89	102	90	19.5122	10	9	7	18	-5	3	7.9878	0	1	1	2	2	4	5	250	8	1	6	5	2	78	0	3	17	0	0	17
9032	12588	23956	2	0	6.96783	1	111	116	103	4	89	99	3.5	1	2	131	93	89	89	102	90	19.5122	10	-13	0	-7	-17	-14	-20.8333	2	1	1	2	2	4	5	250	8	1	6	5	2	78	0	3	17	0	0	17
9032	12587	23956	3	0	6.96783	1	111	116	103	4	89	99	9	1	3	195	93	89	89	102	90	19.5122	10	2	-1	0	7	-7	13.7879	6	1	2	2	2	3	5	250	8	1	4	4	0	62	0	0	38	0	0	38
9033	12588	23956	2	0	7.16222	1	93	85	103	2	116	114	1.5	1	1	184	111	104	112	109	93	12.1951	6	2	1	9	-12	12	35.3049	18	1	1	2	2	4	5	250	8	1	6	5	2	78	0	3	17	0	0	17
9033	12588	23956	2	0	7.16222	1	93	85	103	2	116	114	1.5	1	2	130	111	104	112	109	93	12.1951	6	5	-2	3	8	-4	-11.9444	-10	1	1	2	2	4	5	250	8	1	6	5	2	78	0	3	17	0	0	17
9033	12587	23956	3	0	7.16222	1	93	85	103	2	116	114	3	1	3	196	111	104	112	109	93	12.1951	6	-6	-2	-8	-5	4	-3.73737	12	1	2	2	2	3	5	250	8	1	4	4	0	62	0	0	38	0	0	38
9034	12594	23956	2	-1	7.09925	1	76	67	91	2	92	85	4	1	1	184	88	103	83	100	87	12.1951	10	-1	-1	6	-45	-2	2.80488	6	1	1						8	1	6	5	2	21	0	0	77	0	0	77
9034	12594	23956	2	-1	7.09925	1	76	67	91	2	92	85	4	1	2	130	88	103	83	100	87	12.1951	10	-7	-1	-4	29	-13	-3.63636	-10	1	1						8	1	6	5	2	21	0	0	77	0	0	77
9034	12628	23956	3	1	7.09925	1	76	67	91	2	92	85	7	1	3	196	88	103	83	100	87	12.1951	10	2	-7	4	-4	4	-0.252525	8	1	2	2	1	4	5	250	5	1	1	4	9	87	0	0	4	0	0	3
9035	12594	23956	2	-1	7.16496	0	78	82	80	0	76	80		1	1		59	58	68	62	77	0	10					-8			1	1						8	1	6	5	2	21	0	0	77	0	0	77
9035	12594	23956	2	-1	7.16496	0	78	82	80	0	76	80		1	2		59	58	68	62	77	0	10								1	1						8	1	6	5	2	21	0	0	77	0	0	77
9035	12378	23945			7.16496	0	78	82	80	0	76	80		1	3		59	58	68	62	77	0	10
9036	12594	23956	2	-1	6.83094	1	109	105	110	3	90	94	13	1	1	184	109	108	107	110	95	14.6341	10	11	0	16	4	-1	2.86585	8	1	1						8	1	6	5	2	21	0	0	77	0	0	77
9036	12594	23956	2	-1	6.83094	1	109	105	110	3	90	94	13	1	2	131	109	108	107	110	95	14.6341	10	-2	-7	3	-7	-10	-8.61111	6	1	1						8	1	6	5	2	21	0	0	77	0	0	77
9036	12587	23956	3	0	6.83094	1	109	105	110	3	90	94	7	1	3	195	109	108	107	110	95	14.6341	10	-3	1	-6	3	-1	11.5657	4	1	2	2	2	3	5	250	8	1	4	4	0	62	0	0	38	0	0	38
9037	12594	23956	2	-1	7.37029	1	88	91	88	2	102	98	4	1	1	184	75	76	84	71	88	2.43902	10	15	13	2	33	-5	15.061	-2	1	1						8	1	6	5	2	21	0	0	77	0	0	77
9037	12594	23956	2	-1	7.37029	1	88	91	88	2	102	98	4	1	2	130	75	76	84	71	88	2.43902	10	-13	-7	-7	-24	-1	2.5	4	1	1						8	1	6	5	2	21	0	0	77	0	0	77
9037	12587	23956	3	0	7.37029	1	88	91	88	2	102	98	9	1	3	214	75	76	84	71	88	2.43902	10	12	-5	11	14	0	0.454545	4	1	2	2	2	3	5	250	8	1	4	4	0	62	0	0	38	0	0	38
9038	12594	23956	2	-1	7.43326	1	130	134	118	5	97	104	13	1	1	184	97	103	92	109	90	14.6341	32	1	-4	11	-11	-6	12.8659	-2	1	1						8	1	6	5	2	21	0	0	77	0	0	77
9038	12594	23956	2	-1	7.43326	1	130	134	118	5	97	104	13	1	2	130	97	103	92	109	90	14.6341	32	-5	-2	-1	-5	-22		-22	1	1						8	1	6	5	2	21	0	0	77	0	0	77
9038	12587	23956	3	0	7.43326	1	130	134	118	5	97	104	15.5	1	3	196	97	103	92	109	90	14.6341	32	9	5	11	0	23		2	1	2	2	2	3	5	250	8	1	4	4	0	62	0	0	38	0	0	38
9039	12594	23956	2	-1	6.78439	1	86	91	85	2	95	100	1.5	1	1	184	80	97	81	90	80	2.43902	6	1	1	9	-17	13	22.561	0	1	1						8	1	6	5	2	21	0	0	77	0	0	77
9039	12594	23956	2	-1	6.78439	1	86	91	85	2	95	100	1.5	1	2	131	80	97	81	90	80	2.43902	6	11	-7	2	25	-11	-0.555556	-4	1	1						8	1	6	5	2	21	0	0	77	0	0	77
9039	12587	23956	3	0	6.78439	1	86	91	85	2	95	100	3.5	1	3	195	80	97	81	90	80	2.43902	6	-7	6	-5	-8	-2	-13.0808	4	1	2	2	2	3	5	250	8	1	4	4	0	62	0	0	38	0	0	38
9040	12594	23956	2	-1	7.47433	1	94	100	90	2	114	105	8	1	1	184	93	89	94	97	84	19.5122	12	-6	8	-7	-4	-6	2.9878	6	1	1						8	1	6	5	2	21	0	0	77	0	0	77
9040	12594	23956	2	-1	7.47433	1	94	100	90	2	114	105	8	1	2	130	93	89	94	97	84	19.5122	12	-5	-6	1	-10	-8	-17.9545	-12	1	1						8	1	6	5	2	21	0	0	77	0	0	77
9040	12628	23956	3	1	7.47433	1	94	100	90	2	114	105	7	1	3	196	93	89	94	97	84	19.5122	12	0	1	1	-2	6	22.1212	10	1	2	2	1	4	5	250	5	1	1	4	9	87	0	0	4	0	0	3
9042	12594	23956	2	-1	7.41684	0	82	79	90	2	83	82	7.5	1	1	184	101	57	101	98	104	17.0732	12	-15	7	-16	-9	-8	5.42683	2	1	1						8	1	6	5	2	21	0	0	77	0	0	77
9042	12594	23956	2	-1	7.41684	0	82	79	90	2	83	82	7.5	1	2	130	101	57	101	98	104	17.0732	12	8	-5	10	4	2	-11.3889	-10	1	1						8	1	6	5	2	21	0	0	77	0	0	77
9042	12587	23956	3	0	7.41684	0	82	79	90	2	83	82	19	1	3	196	101	57	101	98	104	17.0732	12	-1	0	3	-8	-1	20.7071	2	1	2	2	2	3	5	250	8	1	4	4	0	62	0	0	38	0	0	38
9043	12587	23956	2	1	7.09103	1	102	85	117	2	121	110	0	1	1	182	118	121	121	111	90	22.5	32	8	-5	11	2	0	-12.7439	-4	1	1	2	2	3	5	300	5	1	5	4	21	30	0	0	49	0	0	49
9043	12587	23956	2	1	7.09103	1	102	85	117	2	121	110	0	1	2	133	118	121	121	111	90	22.5	32	-13	-3	-15	-11	12	3.57724	-12	1	1	2	2	3	5	300	5	1	5	4	21	30	0	0	49	0	0	49
9043	12587	23956	3	0	7.09103	1	102	85	117	2	121	110	0.5	1	3	195	118	121	121	111	90	22.5	32	-3	3	-3	-1	-2	13.9394	2	1	2	2	2	3	5	250	8	1	4	4	0	62	0	0	38	0	0	38
9044	12587	23956	2	1	6.80082	0	107	114	98	4	114	110	5.5	1	1	181	120	111	118	116	114	20	18	3	4	6	0	-11	9.26829	22	1	1	2	2	3	5	300	5	1	5	4	21	30	0	0	49	0	0	49
9044	12587	23956	2	1	6.80082	0	107	114	98	4	114	110	5.5	1	2	133	120	111	118	116	114	20	18	1	-3	5	-9	7	4.06504	-14	1	1	2	2	3	5	300	5	1	5	4	21	30	0	0	49	0	0	49
9044	12587	23956	3	0	6.80082	0	107	114	98	4	114	110	3	1	3	195	120	111	118	116	114	20	18	0	-1	-3	5	0	9.84848	2	1	2	2	2	3	5	250	8	1	4	4	0	62	0	0	38	0	0	38
9045	12587	23956	2	1	7.08556	0	105	105	103	3	88	86	19.5	1	1	182	98	76	94	111	83	15	10	-5	5	4	-17	-5	-15	10	1	1	2	2	3	5	300	5	1	5	4	21	30	0	0	49	0	0	49
9045	12587	23956	2	1	7.08556	0	105	105	103	3	88	86	19.5	1	2	133	98	76	94	111	83	15	10	-5	-8	5	-15	-12	0	-4	1	1	2	2	3	5	300	5	1	5	4	21	30	0	0	49	0	0	49
9045	12628	23956	3	1	7.08556	0	105	105	103	3	88	86	4	1	3	195	98	76	94	111	83	15	10	8	7	6	6	18	13.3333	-6	1	2	2	1	4	5	250	5	1	1	4	9	87	0	0	4	0	0	3
9046	12587	23956	2	1	7.54004	0	83	85	85	2	106	109		1	1	184	71	103	76	75	75	15	10					-6	-2.80488		1	1	2	2	3	5	300	5	1	5	4	21	30	0	0	49	0	0	49
9046	12587	23956	2	1	7.54004	0	83	85	85	2	106	109		1	2		71	103	76	75	75	15	10								1	1	2	2	3	5	300	5	1	5	4	21	30	0	0	49	0	0	49
9046	12378	23945			7.54004	0	83	85	85	2	106	109		1	3		71	103	76	75	75	15	10
9047	12590	23956	5	0	10.36	0	82	87	82	2	88	87	58	1	1	184	83	88	90	84	75		4	3	4	6	-3	7		0	0	1	2	2	4	5	300	8	1	6	4	0	70	0	0	30	0	0	30
9047	12590	23956	5	0	10.36	0	82	87	82	2	88	87	58	1	2	132	83	88	90	84	75		4	5	0	1	8	6	-3.73098	-4	0	1	2	2	4	5	300	8	1	6	4	0	70	0	0	30	0	0	30
9047	12630	23956	6	0	10.36	0	82	87	82	2	88	87	51.5	1	3	211	83	88	90	84	75		4	-7	5	-7	-10	2	1.03093	10	1	2	3	2	3	5	250	5
9048	12590	23956	5	0	10.3792	1	84	79	94	4	102	94	5	1	1	184	73	86	82	74	71	3.40909	8	-1	-2	6	-12	-4	3.73377	-2	0	1	2	2	4	5	300	8	1	6	4	0	70	0	0	30	0	0	30
9048	12590	23956	5	0	10.3792	1	84	79	94	4	102	94	5	1	2	132	73	86	82	74	71	3.40909	8	-4	7	-7	-2	8	6.58263	-2	0	1	2	2	4	5	300	8	1	6	4	0	70	0	0	30	0	0	30
9048	12629	23956	6	0	10.3792	1	84	79	94	4	102	94	0.5	1	3	193	73	86	82	74	71	3.40909	8	7	-1	13	1	-3	6.89307	4	1	2	2	1	2	5	250	6
9050	12590	23956	5	0	10.6694	1	107	109	102	3	111	94	3	1	1	184	86	100	90	83	97	28.4091	20	7	-5	8	3	3	-8.171	-4	0	1	2	2	4	5	300	8	1	6	4	0	70	0	0	30	0	0	30
9050	12590	23956	5	0	10.6694	1	107	109	102	3	111	94	3	1	2	134	86	100	90	83	97	28.4091	20	1	0	3	-3	-2	-4.77418	-8	0	1	2	2	4	5	300	8	1	6	4	0	70	0	0	30	0	0	30
9050	12630	23956	6	0	10.6694	1	107	109	102	3	111	94	9	1	3	191	86	100	90	83	97	28.4091	20	-3	5	-6	4	-2	1.20275	6	1	2	3	2	3	5	250	5
9051	12590	23956	5	0	10.2368	1	90	103	80	4	123	118	5	1	1	184	93	88	101	90	79	23.8636	8	0	5	-1	-1	7	-16.7208	6	0	1	2	2	4	5	300	8	1	6	4	0	70	0	0	30	0	0	30
9051	12590	23956	5	0	10.2368	1	90	103	80	4	123	118	5	1	2	132	93	88	101	90	79	23.8636	8	1	-2	3	1	-3	17.3669	-10	0	1	2	2	4	5	300	8	1	6	4	0	70	0	0	30	0	0	30
9051	12629	23956	6	0	10.2368	1	90	103	80	4	123	118	12	1	3	193	93	88	101	90	79	23.8636	8	-3	-6	0	-7	0	-6.98403	8	1	2	2	1	2	5	250	6
9052	12590	23956	5	0	10.5243	1	93	96	91	3	110	105		1	1		65	111	75	60	78	4.54545	4								0	1	2	2	4	5	300	8	1	6	4	0	70	0	0	30	0	0	30
9052	12590	23956	5	0	10.5243	1	93	96	91	3	110	105		1	2		65	111	75	60	78	4.54545	4								0	1	2	2	4	5	300	8	1	6	4	0	70	0	0	30	0	0	30
9052	12378	23945			10.5243	1	93	96	91	3	110	105		1	3		65	111	75	60	78	4.54545	4
9053	12590	23956	5	0	9.95756	1	104	102	105	4	76	91		1	1		87	88	93	89	78	12.5	12							-12	0	1	2	2	4	5	300	8	1	6	4	0	70	0	0	30	0	0	30
9053	12590	23956	5	0	9.95756	1	104	102	105	4	76	91		1	2		87	88	93	89	78	12.5	12								0	1	2	2	4	5	300	8	1	6	4	0	70	0	0	30	0	0	30
9053	12378	23945			9.95756	1	104	102	105	4	76	91		1	3		87	88	93	89	78	12.5	12
9054	12590	23956	5	0	10.2834	1	107	100	112	3	85	87		1	1	184	67	104	79	67	61	5.68182	8	10	-2	12	4	4	5.03247	4	0	1	2	2	4	5	300	8	1	6	4	0	70	0	0	30	0	0	30
9054	12590	23956	5	0	10.2834	1	107	100	112	3	85	87		1	2		67	104	79	67	61	5.68182	8								0	1	2	2	4	5	300	8	1	6	4	0	70	0	0	30	0	0	30
9054	12378	23945			10.2834	1	107	100	112	3	85	87		1	3		67	104	79	67	61	5.68182	8
9055	12557	23976	5	-1	10.5927	1	97	104	89	4	93	92	7.5	0	1	204	90	92	106	80	73	9.09091	16	-3	2	-7	0	3	-1.13636	8	0	1	2	1	2	5	300	8	0	5	4	0	3	9	12	76	0	0	0
9055	12557	23976	5	-1	10.5927	1	97	104	89	4	93	92	7.5	0	2	121	90	92	106	80	73	9.09091	16	-6	2	-10	1	-1	2.82977	-8	0	1	2	1	2	5	300	8	0	5	4	0	3	9	12	76	0	0	0
9055	12670	23976	6	-1	10.5927	1	97	104	89	4	93	92	14	0	3	200	90	92	106	80	73	9.09091	16	4	0	7	0	0	18.0817	-2	1	2	2	2	3		460	8	1	3	4	0	48	15	0	37	0	0	50
9056	12557	23976	5	-1	10.4175	1	89	83	98	5	100	87	10	0	1	204	85	87	100	74	72	9.09091	14	-1	-4	-6	7	2	-2.27273	6	0	1	2	1	2	5	300	8	0	5	4	0	3	9	12	76	0	0	0
9056	12557	23976	5	-1	10.4175	1	89	83	98	5	100	87	10	0	2	119	85	87	100	74	72	9.09091	14	-6	-2	4	-21	1	5.92692	-10	0	1	2	1	2	5	300	8	0	5	4	0	3	9	12	76	0	0	0
9056	12670	23976	6	-1	10.4175	1	89	83	98	5	100	87	9	0	3		85	87	100	74	72	9.09091	14								1	2	2	2	3		460	8	1	3	4	0	48	15	0	37	0	0	50
9058	12557	23976	5	-1	9.97125	1	71	76	74	2	109	105	1	0	1	204	66	90	70	69	81	6.81818	6	0	-4	0	0	-1	-4.54545	4	0	1	2	1	2	5	300	8	0	5	4	0	3	9	12	76	0	0	0
9058	12557	23976	5	-1	9.97125	1	71	76	74	2	109	105	1	0	2	120	66	90	70	69	81	6.81818	6	3	-5	10	2	-21	-1.2418	-6	0	1	2	1	2	5	300	8	0	5	4	0	3	9	12	76	0	0	0
9058	12669	23976	6	1	9.97125	1	71	76	74	2	109	105	0	0	3	201	66	90	70	69	81	6.81818	6	-11	1	-11	-13	7	-0.0505357	6	1	2	1	2	3		340	8	0	5	4	0	0	46	9	45	0	0	27
9059	12557	23976	5	-1	9.98494	1	101	93	108	4	97	100	9	0	1	204	97	99	110	85	88	19.3182	10	0	11	1	-4	5	10.2273	12	0	1	2	1	2	5	300	8	0	5	4	0	3	9	12	76	0	0	0
9059	12557	23976	5	-1	9.98494	1	101	93	108	4	97	100	9	0	2	120	97	99	110	85	88	19.3182	10	-7	-5	-6	-3	-11	-15.1125	-10	0	1	2	1	2	5	300	8	0	5	4	0	3	9	12	76	0	0	0
9059	12669	23976	6	1	9.98494	1	101	93	108	4	97	100	15	0	3	201	97	99	110	85	88	19.3182	10	0	5	-4	-1	11	5.17485	6	1	2	1	2	3		340	8	0	5	4	0	0	46	9	45	0	0	27
9060	12557	23976	5	-1	10.5325	1	84	80	92	2	104	94	4	0	1	204	99	91	119	80	85	6.81818	10	-10	6	-20	-4	8	17.0455	10	0	1	2	1	2	5	300	8	0	5	4	0	3	9	12	76	0	0	0
9060	12557	23976	5	-1	10.5325	1	84	80	92	2	104	94	4	0	2	121	99	91	119	80	85	6.81818	10	2	2	5	2	-2	0.646168	-8	0	1	2	1	2	5	300	8	0	5	4	0	3	9	12	76	0	0	0
9060	12670	23976	6	-1	10.5325	1	84	80	92	2	104	94	1	0	3	200	99	91	119	80	85	6.81818	10	-7	-5	-6	-7	-7	1.96078	4	1	2	2	2	3		460	8	1	3	4	0	48	15	0	37	0	0	50
9061	12557	23976	5	-1	10.1875	0	60	55	74	2	97	94	24	0	1	204	57	61	69	54	68	3.40909	10	7	3	12	4	5	-1.13636	4	0	1	2	1	2	5	300	8	0	5	4	0	3	9	12	76	0	0	0
9061	12557	23976	5	-1	10.1875	0	60	55	74	2	97	94	24	0	2	119	57	61	69	54	68	3.40909	10	0	0	1	-6	-5	-2.27273	-4	0	1	2	1	2	5	300	8	0	5	4	0	3	9	12	76	0	0	0
9061	12669	23976	6	1	10.1875	0	60	55	74	2	97	94	2	0	3	202	57	61	69	54	68	3.40909	10	8	6	4	10	11	0	0	1	2	1	2	3		340	8	0	5	4	0	0	46	9	45	0	0	27
9062	12557	23976	5	-1	9.79603	1	102	110	92	3	104	89	7	0	1	204	97	104	104	87	99	19.3182	14	2	2	-1	6	1	12.5	14	0	1	2	1	2	5	300	8	0	5	4	0	3	9	12	76	0	0	0
9062	12557	23976	5	-1	9.79603	1	102	110	92	3	104	89	7	0	2	120	97	104	104	87	99	19.3182	14	-7	6	-2	-10	-12	-16.1319	-12	0	1	2	1	2	5	300	8	0	5	4	0	3	9	12	76	0	0	0
9062	12670	23976	6	-1	9.79603	1	102	110	92	3	104	89	0	0	3	201	97	104	104	87	99	19.3182	14	1	5	-1	2	6	12.1488	2	1	2	2	2	3		460	8	1	3	4	0	48	15	0	37	0	0	50
9063	12557	23976	5	-1	10.078	0	108	110	103	2	102	91	4.5	0	1	204	89	108	100	81	83	5.68182	10	-5	-5	-5	-8	3	5.68182	8	0	1	2	1	2	5	300	8	0	5	4	0	3	9	12	76	0	0	0
9063	12557	23976	5	-1	10.078	0	108	110	103	2	102	91	4.5	0	2	119	89	108	100	81	83	5.68182	10	4	8	3	4	6	-6.209	-8	0	1	2	1	2	5	300	8	0	5	4	0	3	9	12	76	0	0	0
9063	12669	23976	6	1	10.078	0	108	110	103	2	102	91	5	0	3	202	89	108	100	81	83	5.68182	10	-1	5	-3	3	-2	9.55124	2	1	2	1	2	3		340	8	0	5	4	0	0	46	9	45	0	0	27
9064	12507	23957	2	-1	7.0883	0	104	99	108	2	104	106	5.5	1	1	169	91	112	103	79	101	25	16	23	-2	25	24	-39	-25	20	1	1	1	1	3	5	300	7	1	6	4	5	54	7	9	13	12	0	11
9064	12507	23957	2	-1	7.0883	0	104	99	108	2	104	106	5.5	1	2	146	91	112	103	79	101	25	16	-16	-9	-11	-24	20	11.3636	-20	1	1	1	1	3	5	300	7	1	6	4	5	54	7	9	13	12	0	11
9064	12508	23957	3	-1	7.0883	0	104	99	108	2	104	106	3.5	1	3	190	91	112	103	79	101	25	16	17	4	3	24	18	1.9697	10	1	2	2	1	4	5	500	8	1	4	4	8	49	13	5	25	0	0	25
9065	12507	23957	2	-1	6.93498	0	91	76	108	2	78	77	17.5	1	1	169	74	86	85	75	69	7.5	10	-14	-2	-2	-32	-4	-2.62195	2	1	1	1	1	3	5	300	7	1	6	4	5	54	7	9	13	12	0	11
9065	12507	23957	2	-1	6.93498	0	91	76	108	2	78	77	17.5	1	2	146	74	86	85	75	69	7.5	10	17	-9	-5	44	3		-4	1	1	1	1	3	5	300	7	1	6	4	5	54	7	9	13	12	0	11
9065	12631	23957	3	0	6.93498	0	91	76	108	2	78	77	14	1	3	190	74	86	85	75	69	7.5	10	-14	-6	-3	-26	-7		2	1	2	2	1	3	5	300	10	1	5	4	31	29	0	0	21	19	0	40
9066	12507	23957	2	-1	6.91307	1	95	91	100	4	100	95		1	1	169	110	113	106	115	99	10	22	0	1	4	-3	-10	24.1463	8	1	1	1	1	3	5	300	7	1	6	4	5	54	7	9	13	12	0	11
9066	12507	23957	2	-1	6.91307	1	95	91	100	4	100	95		1	2		110	113	106	115	99	10	22								1	1	1	1	3	5	300	7	1	6	4	5	54	7	9	13	12	0	11
9066	12378	23945			6.91307	1	95	91	100	4	100	95		1	3		110	113	106	115	99	10	22
9067	12507	23957	2	-1	6.80082	1	94	96	94	3	116	114		1	1	166	85	99	92	84	91	7.5	12					-8	4.69512	-12	1	1	1	1	3	5	300	7	1	6	4	5	54	7	9	13	12	0	11
9067	12507	23957	2	-1	6.80082	1	94	96	94	3	116	114		1	2		85	99	92	84	91	7.5	12								1	1	1	1	3	5	300	7	1	6	4	5	54	7	9	13	12	0	11
9067	12378	23945			6.80082	1	94	96	94	3	116	114		1	3		85	99	92	84	91	7.5	12
9068	12507	23957	2	-1	6.97057	1	108	105	108	3	106	139	16	1	1		97	111	98	102	75	7.5	22								1	1	1	1	3	5	300	7	1	6	4	5	54	7	9	13	12	0	11
9068	12507	23957	2	-1	6.97057	1	108	105	108	3	106	139	16	1	2		97	111	98	102	75	7.5	22								1	1	1	1	3	5	300	7	1	6	4	5	54	7	9	13	12	0	11
9068	12619	23952	3	0	6.97057	1	108	105	108	3	106	139	15	1	3		97	111	98	102	75	7.5	22								1	2	2	2	4	5	300	7	1	6	4	0	60	0	7	33	0	0	33
9069	12507	23957	2	-1	6.75428	0		107		2	91	94	7	1	1	166	112	95	116	106	95	5	22	6	-6	8	-1	-1	24.2683	12	1	1	1	1	3	5	300	7	1	6	4	5	54	7	9	13	12	0	11
9069	12507	23957	2	-1	6.75428	0		107		2	91	94	7	1	2	146	112	95	116	106	95	5	22	-17	-9	-12	-16	1	-13.7127	-26	1	1	1	1	3	5	300	7	1	6	4	5	54	7	9	13	12	0	11
9069	12631	23957	3	0	6.75428	0		107		2	91	94	9	1	3	190	112	95	116	106	95	5	22	15	5	8	20	1	25.3535	14	1	2	2	1	3	5	300	10	1	5	4	31	29	0	0	21	19	0	40
9070	12507	23957	2	-1	7.23888	0	88	79	100	2	77	83	10	1	1	169	88	105	92	92	71	10	12	-5	2	-7	-4	11	4.63415	6	1	1	1	1	3	5	300	7	1	6	4	5	54	7	9	13	12	0	11
9070	12507	23957	2	-1	7.23888	0	88	79	100	2	77	83	10	1	2	146	88	105	92	92	71	10	12	0	-8	3	-7	-2	-12.4119	-12	1	1	1	1	3	5	300	7	1	6	4	5	54	7	9	13	12	0	11
9070	12631	23957	3	0	7.23888	0	88	79	100	2	77	83	9	1	3	190	88	105	92	92	71	10	12	5	-1	10	3	-8	9.14141	2	1	2	2	1	3	5	300	10	1	5	4	31	29	0	0	21	19	0	40
9071	12507	23957	2	-1	7.00616	1	100	84	116	2	84	97	11	1	1	169	93	98	89	102	86	10	30	-1	0	10	-11	-9	-2.68293	-14	1	1	1	1	3	5	300	7	1	6	4	5	54	7	9	13	12	0	11
9071	12507	23957	2	-1	7.00616	1	100	84	116	2	84	97	11	1	2	146	93	98	89	102	86	10	30	0	-3	-11	13	8	4.04656	0	1	1	1	1	3	5	300	7	1	6	4	5	54	7	9	13	12	0	11
9071	12508	23957	3	-1	7.00616	1	100	84	116	2	84	97	6.5	1	3	190	93	98	89	102	86	10	30	8	2	12	0	2	4.19192	-2	1	2	2	1	4	5	500	8	1	4	4	8	49	13	5	25	0	0	25
9072	12507	23957	2	-1	6.91034	0	102	91	111	2	103	108	21	1	1	166	96	111	96	98	93	7.5	20	8	1	22	-6	-19	4.69512	-8	1	1	1	1	3	5	300	7	1	6	4	5	54	7	9	13	12	0	11
9072	12507	23957	2	-1	6.91034	0	102	91	111	2	103	108	21	1	2	146	96	111	96	98	93	7.5	20	-8	-3	-20	8	1	-5.52846	-2	1	1	1	1	3	5	300	7	1	6	4	5	54	7	9	13	12	0	11
9072	12631	23957	3	0	6.91034	0	102	91	111	2	103	108	18.5	1	3	190	96	111	96	98	93	7.5	20	4	4	22	-16	-8	2.42424	20	1	2	2	1	3	5	300	10	1	5	4	31	29	0	0	21	19	0	40
9073	12507	23957	2	-1	7.49076	0	97	97	97	2	89	82	6	1	1	169	84	99	88	88	76	5	10	0	0	-2	0	1	7.19512	6	1	1	1	1	3	5	300	7	1	6	4	5	54	7	9	13	12	0	11
9073	12507	23957	2	-1	7.49076	0	97	97	97	2	89	82	6	1	2	145	84	99	88	88	76	5	10	-11	-1	2	-27	-8	-12.1951	-2	1	1	1	1	3	5	300	7	1	6	4	5	54	7	9	13	12	0	11
9073	12508	23957	3	-1	7.49076	0	97	97	97	2	89	82	6.5	1	3	191	84	99	88	88	76	5	10	8	-3	7	5	11	15.5556	-6	1	2	2	1	4	5	500	8	1	4	4	8	49	13	5	25	0	0	25
9074	12507	23957	2	-1	6.94319	0	96	87	105	0	108	103	1.5	1	1	169	85	107	84	97	72	5	10	-2	-3	-1	-5	2	4.7561	6	1	1	1	1	3	5	300	7	1	6	4	5	54	7	9	13	12	0	11
9074	12507	23957	2	-1	6.94319	0	96	87	105	0	108	103	1.5	1	2	146	85	107	84	97	72	5	10	-3	-5	-2	-5	4	-5.31165	-4	1	1	1	1	3	5	300	7	1	6	4	5	54	7	9	13	12	0	11
9074	12631	23957	3	0	6.94319	0	96	87	105	0	108	103	0	1	3	190	85	107	84	97	72	5	10	4	2	10	-4	-3	4.64646	4	1	2	2	1	3	5	300	10	1	5	4	31	29	0	0	21	19	0	40
9075	12507	23957	2	-1	6.88843	1	99	102	96	2	102	97	0	1	1	169	96	102	94	103	93	5	14	-3	4	-2	-5	-1	-0.121951	10	1	1	1	1	3	5	300	7	1	6	4	5	54	7	9	13	12	0	11
9075	12507	23957	2	-1	6.88843	1	99	102	96	2	102	97	0	1	2	146	96	102	94	103	93	5	14	-7	-7	-3	-7	-22		-10	1	1	1	1	3	5	300	7	1	6	4	5	54	7	9	13	12	0	11
9075	12508	23957	3	-1	6.88843	1	99	102	96	2	102	97	0	1	3	190	96	102	94	103	93	5	14	14	1	20	2	18		12	1	2	2	1	4	5	500	8	1	4	4	8	49	13	5	25	0	0	25
9076	12507	23957	2	-1	6.80356	1	80	78	87	3	121	131	0	1	1	169	97	112	95	105	88	10	16	-12	-1	0	-27	-7	-2.68293	2	1	1	1	1	3	5	300	7	1	6	4	5	54	7	9	13	12	0	11
9076	12507	23957	2	-1	6.80356	1	80	78	87	3	121	131	0	1	2	146	97	112	95	105	88	10	16	2	-3	-5	10	2	-2.87263	-4	1	1	1	1	3	5	300	7	1	6	4	5	54	7	9	13	12	0	11
9076	12631	23957	3	0	6.80356	1	80	78	87	3	121	131	0	1	3	190	97	112	95	105	88	10	16	4	1	0	6	14	6.91919	-2	1	2	2	1	3	5	300	10	1	5	4	31	29	0	0	21	19	0	40
9077	12507	23957	2	-1	7.34565	0	110	119	97	2	92	98	0	1	1	169	106	78	88	144	80	10	28	-11	12	12	-49	-2	4.63415	-6	1	1	1	1	3	5	300	7	1	6	4	5	54	7	9	13	12	0	11
9077	12507	23957	2	-1	7.34565	0	110	119	97	2	92	98	0	1	2	145	106	78	88	144	80	10	28	-7	-6	-7	-5	-6	-12.3614	-12	1	1	1	1	3	5	300	7	1	6	4	5	54	7	9	13	12	0	11
9077	12508	23957	3	-1	7.34565	0	110	119	97	2	92	98	0	1	3	191	106	78	88	144	80	10	28	1	7	6	-8	8	17.7273	0	1	2	2	1	4	5	500	8	1	4	4	8	49	13	5	25	0	0	25
9079	12508	23957	2	1	7.45517	1	103	105	100	5	125	113	11.5	1	1	176	90	109	84	105	88	14.6341	24	17	-1	29	-7	4	12.8659	4	1	1	2	1	4	5	300	7	1	6	5	10	34	14	2	40	0	0	40
9079	12508	23957	2	1	7.45517	1	103	105	100	5	125	113	11.5	1	2	138	90	109	84	105	88	14.6341	24	-12	-3	-18	3	-7	-16.3889	-4	1	1	2	1	4	5	300	7	1	6	5	10	34	14	2	40	0	0	40
9079	12631	23957	3	0	7.45517	1	103	105	100	5	125	113	5	1	3	191	90	109	84	105	88	14.6341	24	12	-2	15	0	16	22.9798	12	1	2	2	1	3	5	300	10	1	5	4	31	29	0	0	21	19	0	40
9080	12508	23957	2	1	7.04997	0	113	119	102	3	134	127	4.5	1	1	176	126	112	125	122	101	31.7073	20	-6	-2	4	-22	3	-6.70732	8	1	1	2	1	4	5	300	7	1	6	5	10	34	14	2	40	0	0	40
9080	12508	23957	2	1	7.04997	0	113	119	102	3	134	127	4.5	1	2	139	126	112	125	122	101	31.7073	20	-8	-1	-11	-1	-3	-13.8889	-12	1	1	2	1	4	5	300	7	1	6	5	10	34	14	2	40	0	0	40
9080	12631	23957	3	0	7.04997	0	113	119	102	3	134	127	19.5	1	3	190	126	112	125	122	101	31.7073	20	-5	-2	-3	-1	-12	7.07071	18	1	2	2	1	3	5	300	10	1	5	4	31	29	0	0	21	19	0	40
9081	12508	23957	2	1	7.04175	0	91	84	100	2	100	94	12	1	1	173	97	95	94	106	89	4.87805	10	6	6	32	-25	-16	0.121951	22	1	1	2	1	4	5	300	7	1	6	5	10	34	14	2	40	0	0	40
9081	12508	23957	2	1	7.04175	0	91	84	100	2	100	94	12	1	2	138	97	95	94	106	89	4.87805	10	-20	-4	-15	-29	4	6.11111	-26	1	1	2	1	4	5	300	7	1	6	5	10	34	14	2	40	0	0	40
9081	12631	23957	3	0	7.04175	0	91	84	100	2	100	94	8.5	1	3	191	97	95	94	106	89	4.87805	10	3	1	-5	14	-5	-6.56566	6	1	2	2	1	3	5	300	10	1	5	4	31	29	0	0	21	19	0	40
9082	12508	23957	2	1	7.47981	1	94	88	102	2	97	98	7	1	1	176	84	82	94	76	85	24.3902	18	22	7	19	22	5	-1.89024	14	1	1	2	1	4	5	300	7	1	6	5	10	34	14	2	40	0	0	40
9082	12508	23957	2	1	7.47981	1	94	88	102	2	97	98	7	1	2	138	84	82	94	76	85	24.3902	18	-7	-8	-2	-11	-3	-2.5	-14	1	1	2	1	4	5	300	7	1	6	5	10	34	14	2	40	0	0	40
9082	12631	23957	3	0	7.47981	1	94	88	102	2	97	98	6	1	3	191	84	82	94	76	85	24.3902	18	0	5	2	-2	3	-13.1818	12	1	2	2	1	3	5	300	10	1	5	4	31	29	0	0	21	19	0	40
9083	12508	23957	2	1	7.09377	1	111	112	106	2	108	108	12.5	1	1	176	106	112	100	117	95	12.1951	16	-3	-1	12	-19	-21	-2.19512	24	1	1	2	1	4	5	300	7	1	6	5	10	34	14	2	40	0	0	40
9083	12508	23957	2	1	7.09377	1	111	112	106	2	108	108	12.5	1	2	139	106	112	100	117	95	12.1951	16	1	-3	-2	4	4	-5.55556	-32	1	1	2	1	4	5	300	7	1	6	5	10	34	14	2	40	0	0	40
9083	12631	23957	3	0	7.09377	1	111	112	106	2	108	108	16	1	3	190	106	112	100	117	95	12.1951	16	-9	-1	-11	-8	2	0.10101	18	1	2	2	1	3	5	300	10	1	5	4	31	29	0	0	21	19	0	40
9084	12508	23957	2	1	7.56742	1	121	114	121	3	100	103	7	1	1	176	116	110	126	100	92	17.0732	34	3	1	2	5	-4	2.92683	4	1	1	2	1	4	5	300	7	1	6	5	10	34	14	2	40	0	0	40
9084	12508	23957	2	1	7.56742	1	121	114	121	3	100	103	7	1	2	140	116	110	126	100	92	17.0732	34	-14	1	-15	-7	-3	-6.66667	-10	1	1	2	1	4	5	300	7	1	6	5	10	34	14	2	40	0	0	40
9084	12631	23957	3	0	7.56742	1	121	114	121	3	100	103	3	1	3	189	116	110	126	100	92	17.0732	34	2	8	1	1	2	23.0303	2	1	2	2	1	3	5	300	10	1	5	4	31	29	0	0	21	19	0	40
9085	12508	23957	2	1	6.98426	0	113	114	108	3	98	105	11	1	1	176	96	117	95	102	83	7.31707	12	29	-8	32	15	13	20.1829	10	1	1	2	1	4	5	300	7	1	6	5	10	34	14	2	40	0	0	40
9085	12508	23957	2	1	6.98426	0	113	114	108	3	98	105	11	1	2	139	96	117	95	102	83	7.31707	12	-21	-3	-16	-22	0	-27.5	-8	1	1	2	1	4	5	300	7	1	6	5	10	34	14	2	40	0	0	40
9085	12631	23957	3	0	6.98426	0	113	114	108	3	98	105	18.5	1	3	190	96	117	95	102	83	7.31707	12	-6	2	0	-12	2	6.81818	8	1	2	2	1	3	5	300	10	1	5	4	31	29	0	0	21	19	0	40
9086	12508	23957	2	1	7.18138	1	91	100	85	2	112	118	8	1	1	176	97	112	92	113	83	17.0732	22	-2	-3	1	-16	21	17.9268	4	1	1	2	1	4	5	300	7	1	6	5	10	34	14	2	40	0	0	40
9086	12508	23957	2	1	7.18138	1	91	100	85	2	112	118	8	1	2	138	97	112	92	113	83	17.0732	22	-12	-2	-12	-5	-18	-26.1111	-8	1	1	2	1	4	5	300	7	1	6	5	10	34	14	2	40	0	0	40
9086	12631	23957	3	0	7.18138	1	91	100	85	2	112	118	12	1	3	191	97	112	92	113	83	17.0732	22	7	-2	14	-4	-3	16.1111	-4	1	2	2	1	3	5	300	10	1	5	4	31	29	0	0	21	19	0	40
9087	12508	23957	2	1	7.65777	1	86	88	88	2	96	103	1.5	1	1	176	84	99	83	94	73	12.1951	10	-1	-3	4	-9	4	7.80488	10	1	1	2	1	4	5	300	7	1	6	5	10	34	14	2	40	0	0	40
9087	12508	23957	2	1	7.65777	1	86	88	88	2	96	103	1.5	1	2	140	84	99	83	94	73	12.1951	10	-3	0	-6	0	3	-11.1111	-12	1	1	2	1	4	5	300	7	1	6	5	10	34	14	2	40	0	0	40
9087	12631	23957	3	0	7.65777	1	86	88	88	2	96	103	2.5	1	3	189	84	99	83	94	73	12.1951	10	3	-3	7	2	-8	4.74747	10	1	2	2	1	3	5	300	10	1	5	4	31	29	0	0	21	19	0	40
9088	12508	23957	2	1	7.57016	0	107	105	107	3	111	95		1	1	176	99	94	99	105	82	7.31707	14	1	4	9	-2	1	15.1829	8	1	1	2	1	4	5	300	7	1	6	5	10	34	14	2	40	0	0	40
9088	12508	23957	2	1	7.57016	0	107	105	107	3	111	95		1	2	140	99	94	99	105	82	7.31707	14	-3	-5	-2	-9	-9	-18.0556	-6	1	1	2	1	4	5	300	7	1	6	5	10	34	14	2	40	0	0	40
9088	12631	23957	3	0	7.57016	0	107	105	107	3	111	95	6.5	1	3	189	99	94	99	105	82	7.31707	14	0	5	3	-6	4	6.91919	0	1	2	2	1	3	5	300	10	1	5	4	31	29	0	0	21	19	0	40
9091	12508	23957	2	1	7.55099	1	96	82	110	2	125	116	2	1	1	176	104	106	106	105	90	12.1951	20	10	3	12	0	4	12.8049	8	1	1	2	1	4	5	300	7	1	6	5	10	34	14	2	40	0	0	40
9091	12508	23957	2	1	7.55099	1	96	82	110	2	125	116	2	1	2	140	104	106	106	105	90	12.1951	20	-14	-3	-8	-11	-14	6.11111	-4	1	1	2	1	4	5	300	7	1	6	5	10	34	14	2	40	0	0	40
9091	12631	23957	3	0	7.55099	1	96	82	110	2	125	116	4	1	3	189	104	106	106	105	90	12.1951	20	-2	-3	-6	-2	14	21.1616	6	1	2	2	1	3	5	300	10	1	5	4	31	29	0	0	21	19	0	40
9092	12509	23958	2	0	7.02533	0	107	105	106	3	103	109	14.5	1	1	182	115	112	117	106	106	15	12	2	4	4	-5	6	28.9024	-2	1	1	2	1	4	5	300	8	1	5	4	43	0	0	12	45	0	0	0
9092	12509	23958	2	0	7.02533	0	107	105	106	3	103	109	14.5	1	2	154	115	112	117	106	106	15	12	-14	-8	-13	-6	-10	-21.1752	8	1	1	2	1	4	5	300	8	1	5	4	43	0	0	12	45	0	0	0
9092	13372	23958	3		7.02533	0	107	105	106	3	103	109	14.5	1	3		115	112	117	106	106	15	12
9093	12509	23958	2	0	7.04449	0	106	91	118	4	130	118	3.5	1	1	182	114	115	110	117	103	27.5	16	16	0	19	-2	22	1.76829	2	1	1	2	1	4	5	300	8	1	5	4	43	0	0	12	45	0	0	0
9093	12509	23958	2	0	7.04449	0	106	91	118	4	130	118	3.5	1	2	154	114	115	110	117	103	27.5	16	-13	-2	-9	-13	-11	-20.1774	-2	1	1	2	1	4	5	300	8	1	5	4	43	0	0	12	45	0	0	0
9093	13372	23958	3		7.04449	0	106	91	118	4	130	118	7	1	3		114	115	110	117	103	27.5	16
9094	12509	23958	2	0	7.29637	0	77	76	85	3	109	105	3.5	1	1	182	98	101	99	105	72	7.5	10	-9	7	6	-29	-2	7.13415	0	1	1	2	1	4	5	300	8	1	5	4	43	0	0	12	45	0	0	0
9094	12509	23958	2	0	7.29637	0	77	76	85	3	109	105	3.5	1	2	153	98	101	99	105	72	7.5	10	-1	-11	-12	9	20	-10.0887	0	1	1	2	1	4	5	300	8	1	5	4	43	0	0	12	45	0	0	0
9094	13372	23958	3		7.29637	0	77	76	85	3	109	105	7	1	3		98	101	99	105	72	7.5	10
9095	12509	23958	2	0	7.56468	0	84	79	93	2	102	94	5.5	1	1	182	97	93	96	105	82	15	10	-4	8	5	-13	-14	2.07317	6	1	1	2	1	4	5	300	8	1	5	4	43	0	0	12	45	0	0	0
9095	12509	23958	2	0	7.56468	0	84	79	93	2	102	94	5.5	1	2	156	97	93	96	105	82	15	10	-1	-7	-2	-2	8	1.10865	-6	1	1	2	1	4	5	300	8	1	5	4	43	0	0	12	45	0	0	0
9095	13372	23958	3		7.56468	0	84	79	93	2	102	94	3.5	1	3		97	93	96	105	82	15	10
9096	12509	23958	2	0	7.436	1	99	105	93	1	92	95	13	1	1	182	100	97	100	101	98	12.5	28	1	7	8	-6	-7	26.5244	-4	1	1	2	1	4	5	300	8	1	5	4	43	0	0	12	45	0	0	0
9096	12509	23958	2	0	7.436	1	99	105	93	1	92	95	13	1	2	153	100	97	100	101	98	12.5	28	-9	-6	-8	-12	0	-39.0244	-4	1	1	2	1	4	5	300	8	1	5	4	43	0	0	12	45	0	0	0
9096	13372	23958	3		7.436	1	99	105	93	1	92	95	10	1	3		100	97	100	101	98	12.5	28
9097	12509	23958	2	0	7.0089	0	97	93	101	5	116	111	0	1	1	182	95	120	95	102	81	12.5	10	9	3	15	-5	7	14.3293	4	1	1	2	1	4	5	300	8	1	5	4	43	0	0	12	45	0	0	0
9097	12509	23958	2	0	7.0089	0	97	93	101	5	116	111	0	1	2	155	95	120	95	102	81	12.5	10	-17	-10	-17	-8	-17	-20.0111	2	1	1	2	1	4	5	300	8	1	5	4	43	0	0	12	45	0	0	0
9097	13372	23958	3		7.0089	0	97	93	101	5	116	111	2	1	3		95	120	95	102	81	12.5	10
9098	12509	23958	2	0	7.30732	1	93	105	82	4	98	98	21	1	1	182	75	104	77	86	70	5	10	5	-8	-1	10	0	4.7561	0	1	1	2	1	4	5	300	8	1	5	4	43	0	0	12	45	0	0	0
9098	12509	23958	2	0	7.30732	1	93	105	82	4	98	98	21	1	2	153	75	104	77	86	70	5	10	-2	-7	3	-6	-2	-9.7561	0	1	1	2	1	4	5	300	8	1	5	4	43	0	0	12	45	0	0	0
9098	13372	23958	3		7.30732	1	93	105	82	4	98	98	10.5	1	3		75	104	77	86	70	5	10
9099	12509	23958	2	0	7.10746	1	100	85	114	3	88	95	5.5	1	1	182	116	115	120	104	105	22.5	26	10	2	6	16	-6	16.5244	4	1	1	2	1	4	5	300	8	1	5	4	43	0	0	12	45	0	0	0
9099	12509	23958	2	0	7.10746	1	100	85	114	3	88	95	5.5	1	2	153	116	115	120	104	105	22.5	26	-12	-9	-8	-15	-4	-23.1153	-8	1	1	2	1	4	5	300	8	1	5	4	43	0	0	12	45	0	0	0
9099	13372	23958	3		7.10746	1	100	85	114	3	88	95	17	1	3		116	115	120	104	105	22.5	26
9100	12509	23958	2	0	7.47981	1	99	94	104	3	90	85	3.5	1	1	182	86	90	97	76	89	5	26	15	7	16	17	-15	9.63415	0	1	1	2	1	4	5	300	8	1	5	4	43	0	0	12	45	0	0	0
9100	12509	23958	2	0	7.47981	1	99	94	104	3	90	85	3.5	1	2	153	86	90	97	76	89	5	26	-4	-11	-9	-1	10	-0.997783	-12	1	1	2	1	4	5	300	8	1	5	4	43	0	0	12	45	0	0	0
9100	13372	23958	3		7.47981	1	99	94	104	3	90	85	14	1	3		86	90	97	76	89	5	26
9101	12509	23958	2	0	6.87201	1	107	99	123	4	108	109	9	1	1	182	115	122	116	115	88	22.5	28	-1	0	-1	-6	14	-5.42683	6	1	1	2	1	4	5	300	8	1	5	4	43	0	0	12	45	0	0	0
9101	12509	23958	2	0	6.87201	1	107	99	123	4	108	109	9	1	2	154	115	122	116	115	88	22.5	28	-9	-3	-6	-9	-9	-10.255	-14	1	1	2	1	4	5	300	8	1	5	4	43	0	0	12	45	0	0	0
9101	13372	23958	3		6.87201	1	107	99	123	4	108	109	2.5	1	3		115	122	116	115	88	22.5	28
9102	12509	23958	2	0	7.44422	0	93	82	105	3	96	96	7.5	1	1	182	99	102	97	107	91	17.5	16	9	2	21	-12	0	4.45122	16	1	1	2	1	4	5	300	8	1	5	4	43	0	0	12	45	0	0	0
9102	12509	23958	2	0	7.44422	0	93	82	105	3	96	96	7.5	1	2	153	99	102	97	107	91	17.5	16	-8	-5	-4	-8	-6	-15.133	-20	1	1	2	1	4	5	300	8	1	5	4	43	0	0	12	45	0	0	0
9102	13372	23958	3		7.44422	0	93	82	105	3	96	96	5	1	3		99	102	97	107	91	17.5	16
9103	12509	23958	2	0	6.78439	1	99	84	113	3	100	109	14	1	1	182	103	120	101	105	101	20	16	4	-1	9	-5	2	-0.487805	0	1	1	2	1	4	5	300	8	1	5	4	43	0	0	12	45	0	0	0
9103	12509	23958	2	0	6.78439	1	99	84	113	3	100	109	14	1	2	154	103	120	101	105	101	20	16	1	-5	4	-3	-5	-17.2395	-6	1	1	2	1	4	5	300	8	1	5	4	43	0	0	12	45	0	0	0
9103	13372	23958	3		6.78439	1	99	84	113	3	100	109	10	1	3		103	120	101	105	101	20	16
9104	12509	23958	2	0	6.9514	0	89	87	94	2	106	103	11	1	1	182	92	92	98	92	75	5	10	6	10	2	9	9	7.19512	0	1	1	2	1	4	5	300	8	1	5	4	43	0	0	12	45	0	0	0
9104	12509	23958	2	0	6.9514	0	89	87	94	2	106	103	11	1	2	154	92	92	98	92	75	5	10	-17	-3	-9	-26	-9	-9.92239	2	1	1	2	1	4	5	300	8	1	5	4	43	0	0	12	45	0	0	0
9104	13372	23958	3		6.9514	0	89	87	94	2	106	103	12.5	1	3		92	92	98	92	75	5	10
9105	12509	23958	2	0	6.93498	1	98	91	105	4	110	116	5	1	1	182	119	115	112	124	110	35	14	3	-2	12	-17	5	11.3415	-4	1	1	2	1	4	5	300	8	1	5	4	43	0	0	12	45	0	0	0
9105	12509	23958	2	0	6.93498	1	98	91	105	4	110	116	5	1	2	154	119	115	112	124	110	35	14	-14	-4	-6	-12	-20	-39.5233	6	1	1	2	1	4	5	300	8	1	5	4	43	0	0	12	45	0	0	0
9105	13372	23958	3		6.93498	1	98	91	105	4	110	116	1.5	1	3		119	115	112	124	110	35	14
9106	12509	23958	2	0	7.17864	0	105	97	111	5	112	95	0	1	1	182	107	99	107	107	96	25	16	0	2	1	-4	7	-5.4878	4	1	1	2	1	4	5	300	8	1	5	4	43	0	0	12	45	0	0	0
9106	12509	23958	2	0	7.17864	0	105	97	111	5	112	95	0	1	2	153	107	99	107	107	96	25	16	-12	-3	-14	-4	-14	-12.694	-10	1	1	2	1	4	5	300	8	1	5	4	43	0	0	12	45	0	0	0
9106	13372	23958	3		7.17864	0	105	97	111	5	112	95	0	1	3		107	99	107	107	96	25	16
9107	12509	23958	2	0	7.26352	0	113	112	110	3	109	96	5	1	1	182	116	101	117	105	111	30	10	1	8	7	-8	13	30.9756	0	1	1	2	1	4	5	300	8	1	5	4	43	0	0	12	45	0	0	0
9107	12509	23958	2	0	7.26352	0	113	112	110	3	109	96	5	1	2	154	116	101	117	105	111	30	10	-13	-7	-11	-7	-20	-38.2483	12	1	1	2	1	4	5	300	8	1	5	4	43	0	0	12	45	0	0	0
9107	13372	23958	3		7.26352	0	113	112	110	3	109	96	6.5	1	3		116	101	117	105	111	30	10
9108	12509	23958	2	0	7.08008	0	111	102	116	4	116	118	2	1	1	182	115	123	121	106	87	25	24	0	1	-1	-1	6	4.26829	12	1	1	2	1	4	5	300	8	1	5	4	43	0	0	12	45	0	0	0
9108	12509	23958	2	0	7.08008	0	111	102	116	4	116	118	2	1	2	154	115	123	121	106	87	25	24	-6	-7	-3	-7	-2	-17.9047	-18	1	1	2	1	4	5	300	8	1	5	4	43	0	0	12	45	0	0	0
9108	13372	23958	3		7.08008	0	111	102	116	4	116	118	9	1	3		115	123	121	106	87	25	24
9109	12509	23958	2	0	6.76523	1	81	76	92	1	101	106	5.5	1	1	182	109	114	104	110	113	17.5	12	8	1	14	-3	-3	11.7683	-2	1	1	2	1	4	5	300	8	1	5	4	43	0	0	12	45	0	0	0
9109	12509	23958	2	0	6.76523	1	81	76	92	1	101	106	5.5	1	2	154	109	114	104	110	113	17.5	12	-13	-11	-14	-4	-10	-13.3592	6	1	1	2	1	4	5	300	8	1	5	4	43	0	0	12	45	0	0	0
9109	13372	23958	3		6.76523	1	81	76	92	1	101	106	7	1	3		109	114	104	110	113	17.5	12
9110	12510	23958	5	1	10.4367	0	111	112	107	3	105	100	4.5	1	1	182	93	103	103	88	78	22.7273	20	7	0	11	3	3	-0.108225	12	1	1	2	2	4	5	300	8	1	5	5	0	76	13	0	11	0	0	11
9110	12510	23958	5	1	10.4367	0	111	112	107	3	105	100	4.5	1	2	153	93	103	103	88	78	22.7273	20	-3	-3	-10	4	7	-11.8347	-6	1	1	2	2	4	5	300	8	1	5	5	0	76	13	0	11	0	0	11
9110	13371	23958	6		10.4367	0	111	112	107	3	105	100	8	1	3		93	103	103	88	78	22.7273	20
9111	12510	23958	5	1	10.5216	0	103	106	98	5	135	122		1	1	182	117	103	115	110	113	28.4091	30	-1	5	1	-6	3	1.35281	6	1	1	2	2	4	5	300	8	1	5	5	0	76	13	0	11	0	0	11
9111	12510	23958	5	1	10.5216	0	103	106	98	5	135	122		1	2		117	103	115	110	113	28.4091	30								1	1	2	2	4	5	300	8	1	5	5	0	76	13	0	11	0	0	11
9111	12378	23945			10.5216	0	103	106	98	5	135	122		1	3		117	103	115	110	113	28.4091	30
9112	12510	23958	5	1	10.5216	1	97	99	95	6	105	110		1	1	182	93	98	85	95	120	31.8182	18	9	3	16	-1	-5	31.2771	12	1	1	2	2	4	5	300	8	1	5	5	0	76	13	0	11	0	0	11
9112	12510	23958	5	1	10.5216	1	97	99	95	6	105	110		1	2		93	98	85	95	120	31.8182	18								1	1	2	2	4	5	300	8	1	5	5	0	76	13	0	11	0	0	11
9112	12378	23945			10.5216	1	97	99	95	6	105	110		1	3		93	98	85	95	120	31.8182	18
9113	12510	23958	5	1	9.92745	1	101	102	99	2	110	114	12.5	1	1	182	92	92	96	86	100	14.7727		6	5	7	6	-2	14.9892		1	1	2	2	4	5	300	8	1	5	5	0	76	13	0	11	0	0	11
9113	12510	23958	5	1	9.92745	1	101	102	99	2	110	114	12.5	1	2	154	92	92	96	86	100	14.7727		2	2	2	0	4	-17.9972	2	1	1	2	2	4	5	300	8	1	5	5	0	76	13	0	11	0	0	11
9113	13371	23958	6		9.92745	1	101	102	99	2	110	114	5	1	3		92	92	96	86	100	14.7727
9114	12510	23958	5	1	9.93292	0	125	115	127	6	107	98	12	1	1	182	102	119	101	108	90	18.1818	18	1	2	8	-13	10	10.3896	12	1	1	2	2	4	5	300	8	1	5	5	0	76	13	0	11	0	0	11
9114	12510	23958	5	1	9.93292	0	125	115	127	6	107	98	12	1	2	154	102	119	101	108	90	18.1818	18	3	0	-3	11	0	-0.140056	-12	1	1	2	2	4	5	300	8	1	5	5	0	76	13	0	11	0	0	11
9114	13371	23958	6		9.93292	0	125	115	127	6	107	98	19	1	3		102	119	101	108	90	18.1818	18
9115	12510	23958	5	1	10.0534	1	106	108	101	3	104	98	2	1	1	182	101	97	102	95	106	22.7273	22	5	-1	6	6	-5	22.5108	0	1	1	2	2	4	5	300	8	1	5	5	0	76	13	0	11	0	0	11
9115	12510	23958	5	1	10.0534	1	106	108	101	3	104	98	2	1	2	154	101	97	102	95	106	22.7273	22	-14	6	-13	-14	-1	-22.6891	0	1	1	2	2	4	5	300	8	1	5	5	0	76	13	0	11	0	0	11
9115	13371	23958	6		10.0534	1	106	108	101	3	104	98	17.5	1	3		101	97	102	95	106	22.7273	22
9116	12510	23958	5	1	9.96304	1	116	108	118	4	109	102	5	1	1	182	117	114	110	115	119	30.6818	18	-1	4	1	-5	0	3.84199	14	1	1	2	2	4	5	300	8	1	5	5	0	76	13	0	11	0	0	11
9116	12510	23958	5	1	9.96304	1	116	108	118	4	109	102	5	1	2	154	117	114	110	115	119	30.6818	18	-9	3	-2	-15	-3	-3.15126	-4	1	1	2	2	4	5	300	8	1	5	5	0	76	13	0	11	0	0	11
9116	13371	23958	6		9.96304	1	116	108	118	4	109	102	3.5	1	3		117	114	110	115	119	30.6818	18
9117	12510	23958	5	1	10.5626	0	114	114	109	3	91	91	0	1	1	182	102	93	106	94	103	31.8182	26	2	2	0	6	-1	3.8961	6	1	1	2	2	4	5	300	8	1	5	5	0	76	13	0	11	0	0	11
9117	12510	23958	5	1	10.5626	0	114	114	109	3	91	91	0	1	2	155	102	93	106	94	103	31.8182	26	4	4	8	-3	0	-6.30252	-2	1	1	2	2	4	5	300	8	1	5	5	0	76	13	0	11	0	0	11
9117	13371	23958	6		10.5626	0	114	114	109	3	91	91	0	1	3		102	93	106	94	103	31.8182	26
9118	12510	23958	5	1	10.3135	1	66	74	67	5	110	105	0	1	1	182	100	94	103	93	104	19.3182	14	-5	-2	-5	-4	-1	16.3961	-2	1	1	2	2	4	5	300	8	1	5	5	0	76	13	0	11	0	0	11
9118	12510	23958	5	1	10.3135	1	66	74	67	5	110	105	0	1	2	153	100	94	103	93	104	19.3182	14	-5	4	-6	0	-8	-17.0868	0	1	1	2	2	4	5	300	8	1	5	5	0	76	13	0	11	0	0	11
9118	13371	23958	6		10.3135	1	66	74	67	5	110	105	0	1	3		100	94	103	93	104	19.3182	14
9119	12510	23958	5	1	9.8809	0	109	108	107	5	123	100	0	1	1	182	104	97	104	100	106	17.0455	14	-1	12	1	-1	-2	2.00216	0	1	1	2	2	4	5	300	8	1	5	5	0	76	13	0	11	0	0	11
9119	12510	23958	5	1	9.8809	0	109	108	107	5	123	100	0	1	2	154	104	97	104	100	106	17.0455	14	-2	-11	0	0	-8	-12.1849	0	1	1	2	2	4	5	300	8	1	5	5	0	76	13	0	11	0	0	11
9119	13371	23958	6		9.8809	0	109	108	107	5	123	100	0	1	3		104	97	104	100	106	17.0455	14
9120	12559	23977	2	1	7.4935	1	116	116	111	2	116	134	3.5	0	1	188	105	109	106	105	96	27.5	28	9	5	11	-3	12	16.4024	-4	1	1	3	2	2	5	300	7	0	4	3	0	43	14	5	38	0	0	16
9120	12559	23977	2	1	7.4935	1	116	116	111	2	116	134	3.5	0	2	120	105	109	106	105	96	27.5	28	0	-4	2	-2	-3	-23.9024	2	1	1	3	2	2	5	300	7	0	4	3	0	43	14	5	38	0	0	16
9120	12625	23977	3	1	7.4935	1	116	116	111	2	116	134	19.5	0	3	209	105	109	106	105	96	27.5	28	-1	1	-4	1	7	34.5455	8	1	2	2	2	2		300	8	1	6	5	9	54	0	0	37	0	0	37
9121	12559	23977	2	1	7.0527	0	136	147	117	2	110	95	6	0	1	188	98	114	94	106	100	17.5	22	12	-1	19	4	-19	-2.86585	-8	1	1	3	2	2	5	300	7	0	4	3	0	43	14	5	38	0	0	16
9121	12559	23977	2	1	7.0527	0	136	147	117	2	110	95	6	0	2	120	98	114	94	106	100	17.5	22	-11	-5	-7	-12	-6	-12.3614	-2	1	1	3	2	2	5	300	7	0	4	3	0	43	14	5	38	0	0	16
9121	12671	23977	3	-1	7.0527	0	136	147	117	2	110	95	8.5	0	3	209	98	114	94	106	100	17.5	22	-4	-3	0	-12	5	22.1717	4	1	2	3	4	3	5	300	8	0	6	5	0	16	18	7	59	0	0	41
9122	12559	23977	2	1	6.92129	0	88	87	92	1	114	109	9.5	0	1	187	99	104	98	102	100	32.5	14	17	2	17	12	1	-22.7439	4	1	1	3	2	2	5	300	7	0	4	3	0	43	14	5	38	0	0	16
9122	12559	23977	2	1	6.92129	0	88	87	92	1	114	109	9.5	0	2	121	99	104	98	102	100	32.5	14	-6	-5	1	-14	-5	8.42572	2	1	1	3	2	2	5	300	7	0	4	3	0	43	14	5	38	0	0	16
9122	12671	23977	3	-1	6.92129	0	88	87	92	1	114	109	7	0	3	208	99	104	98	102	100	32.5	14	-6	0	2	-12	-6	-2.62626	-6	1	2	3	4	3	5	300	8	0	6	5	0	16	18	7	59	0	0	41
9123	12558	23977	2	-1	6.99521	1	90	96	85	3	87	90	23	0	1	188	83	84	94	79	75	9.7561	8	2	8	6	-10	13	2.7439	2	1	1	2	2	3	5	300	8	0	6	4	3	0	42	9	46	0	0	0
9123	12558	23977	2	-1	6.99521	1	90	96	85	3	87	90	23	0	2	121	83	84	94	79	75	9.7561	8	-11	-6	-12	-8	-12	-5.68182	4	1	1	2	2	3	5	300	8	0	6	4	3	0	42	9	46	0	0	0
9123	12671	23977	3	-1	6.99521	1	90	96	85	3	87	90	4	0	3		83	84	94	79	75	9.7561	8								1	2	3	4	3	5	300	8	0	6	5	0	16	18	7	59	0	0	41
9124	12558	23977	2	-1	7.61944	1	80	79	86	3	102	101	33.5	0	1	181	85	88	89	89	75	7.31707	16	10	3	12	3	3	2.68293	11.5	1	1	2	2	3	5	300	8	0	6	4	3	0	42	9	46	0	0	0
9124	12558	23977	2	-1	7.61944	1	80	79	86	3	102	101	33.5	0	2	128	85	88	89	89	75	7.31707	16	-20	-6	-23	-12	-3	-5.55556	-11.5	1	1	2	2	3	5	300	8	0	6	4	3	0	42	9	46	0	0	0
9124	12652	23966	3	0	7.61944	1	80	79	86	3	102	101		0	3	221	85	88	89	89	75	7.31707	16	12	0	28	-11	-3	-4.44444	2	1	2	2	2	3	5	300	5	0	5	4	0	16	24	21	39	0	0	0
9125	12558	23977	2	-1	6.83641	0	103	102	102	2	80	85	24	0	1	181	86	73	88	93	73	2.43902	12	9	18	11	2	9	17.561	-2	1	1	2	2	3	5	300	8	0	6	4	3	0	42	9	46	0	0	0
9125	12558	23977	2	-1	6.83641	0	103	102	102	2	80	85	24	0	2	128	86	73	88	93	73	2.43902	12	-9	-7	-6	-12	-7	-20	0	1	1	2	2	3	5	300	8	0	6	4	3	0	42	9	46	0	0	0
9125	12671	23977	3	-1	6.83641	0	103	102	102	2	80	85	5.5	0	3	208	86	73	88	93	73	2.43902	12	-5	1	-6	-3	3	6.66667	0	1	2	3	4	3	5	300	8	0	6	5	0	16	18	7	59	0	0	41
9126	12558	23977	2	-1	7.5373	1	96	102	91	2	102	92	3	0	1	181	96	72	102	91	90	24.3902	20	2	-4	-3	7	3	3.10976	-10	1	1	2	2	3	5	300	8	0	6	4	3	0	42	9	46	0	0	0
9126	12558	23977	2	-1	7.5373	1	96	102	91	2	102	92	3	0	2	129	96	72	102	91	90	24.3902	20	-5	-2	-6	-4	3	-25.2273	0	1	1	2	2	3	5	300	8	0	6	4	3	0	42	9	46	0	0	0
9126	12671	23977	3	-1	7.5373	1	96	102	91	2	102	92	0.5	0	3	207	96	72	102	91	90	24.3902	20	-6	1	-5	-10	5	17.7273	-2	1	2	3	4	3	5	300	8	0	6	5	0	16	18	7	59	0	0	41
9127	12558	23977	2	-1	7.65503	1	90	88	95	3	97	98		0	1	181	91	82	88	107	74	9.7561	16	-7	-1	9	-36	7	7.7439	-6	1	1	2	2	3	5	300	8	0	6	4	3	0	42	9	46	0	0	0
9127	12558	23977	2	-1	7.65503	1	90	88	95	3	97	98		0	2	129	91	82	88	107	74	9.7561	16	9	-6	2	22	-4	-4.16667	-2	1	1	2	2	3	5	300	8	0	6	4	3	0	42	9	46	0	0	0
9127	12625	23977	3	1	7.65503	1	90	88	95	3	97	98		0	3		91	82	88	107	74	9.7561	16								1	2	2	2	2		300	8	1	6	5	9	54	0	0	37	0	0	37
9128	12558	23977	2	-1	6.81725	0	89	93	87	2	95	88	0	0	1	181	80	66	88	82	73	2.43902	6	12	7	11	4	16	2.56098	4	1	1	2	2	3	5	300	8	0	6	4	3	0	42	9	46	0	0	0
9128	12558	23977	2	-1	6.81725	0	89	93	87	2	95	88	0	0	2	128	80	66	88	82	73	2.43902	6	7	-2	15	2	-14	-5	-2	1	1	2	2	3	5	300	8	0	6	4	3	0	42	9	46	0	0	0
9128	12671	23977	3	-1	6.81725	0	89	93	87	2	95	88	5.5	0	3	208	80	66	88	82	73	2.43902	6	-4	-6	-11	2	12	2.22222	0	1	2	3	4	3	5	300	8	0	6	5	0	16	18	7	59	0	0	41
9129	12558	23977	2	-1	6.67762	1	81	93	75	1	78	77	0	0	1	181	74	69	71	85	78	4.87805	10	-22	-4	0	-39	-8	-2.37805	0	1	1	2	2	3	5	300	8	0	6	4	3	0	42	9	46	0	0	0
9129	12558	23977	2	-1	6.67762	1	81	93	75	1	78	77	0	0	2	129	74	69	71	85	78	4.87805	10	10	2	3	13	-3	-0.227273	-2	1	1	2	2	3	5	300	8	0	6	4	3	0	42	9	46	0	0	0
9129	12671	23977	3	-1	6.67762	1	81	93	75	1	78	77	0	0	3	207	74	69	71	85	78	4.87805	10	-14	-5	-1	-38	1	-0.0505051	2	1	2	3	4	3	5	300	8	0	6	5	0	16	18	7	59	0	0	41
9130	12558	23977	2	-1	7.25804	1	112	113	107	3	107	113	4.5	0	1	181	121	113	120	121	93	21.9512	38	-3	-2	-3	-4	7	18.0488	-2	1	1	2	2	3	5	300	8	0	6	4	3	0	42	9	46	0	0	0
9130	12558	23977	2	-1	7.25804	1	112	113	107	3	107	113	4.5	0	2	128	121	113	120	121	93	21.9512	38	1	-4	6	-8	2		-18	1	1	2	2	3	5	300	8	0	6	4	3	0	42	9	46	0	0	0
9130	12625	23977	3	1	7.25804	1	112	113	107	3	107	113	7.5	0	3	208	121	113	120	121	93	21.9512	38	-5	-4	-5	-5	-3		10	1	2	2	2	2		300	8	1	6	5	9	54	0	0	37	0	0	37
9131	12558	23977	2	-1	7.01437	0	107	110	101	2	100	97	15	0	1	181	89	102	97	86	85	4.87805	22	15	0	13	15	-9	0.121951	-6	1	1	2	2	3	5	300	8	0	6	4	3	0	42	9	46	0	0	0
9131	12558	23977	2	-1	7.01437	0	107	110	101	2	100	97	15	0	2	127	89	102	97	86	85	4.87805	22	-9	-2	-2	-16	1	-5	0	1	1	2	2	3	5	300	8	0	6	4	3	0	42	9	46	0	0	0
9131	12625	23977	3	1	7.01437	0	107	110	101	2	100	97	10	0	3	209	89	102	97	86	85	4.87805	22	-1	1	-5	1	6	20.4545	-4	1	2	2	2	2		300	8	1	6	5	9	54	0	0	37	0	0	37
9132	12558	23977	2	-1	7.49624	1	74	76	79	2	87	85	3.5	0	1	181	69	81	79	67	67	0	6	15	8	6	22	15	15	4	1	1	2	2	3	5	300	8	0	6	4	3	0	42	9	46	0	0	0
9132	12558	23977	2	-1	7.49624	1	74	76	79	2	87	85	3.5	0	2	127	69	81	79	67	67	0	6	-10	-3	-8	-11	-6	0.555556	-4	1	1	2	2	3	5	300	8	0	6	4	3	0	42	9	46	0	0	0
9132	12625	23977	3	1	7.49624	1	74	76	79	2	87	85	1.5	0	3	209	69	81	79	67	67	0	6	7	2	6	7	5	-4.19192	8	1	2	2	2	2		300	8	1	6	5	9	54	0	0	37	0	0	37
9133	12558	23977	2	-1	7.25804	1	106	115	95	3	88	85	14	0	1	181	78	75	85	80	76	0	8	3	0	8	-9	0	7.5	6	1	1	2	2	3	5	300	8	0	6	4	3	0	42	9	46	0	0	0
9133	12558	23977	2	-1	7.25804	1	106	115	95	3	88	85	14	0	2	128	78	75	85	80	76	0	8	-11	-18	-13	-7	1	-7.5	-2	1	1	2	2	3	5	300	8	0	6	4	3	0	42	9	46	0	0	0
9133	12671	23977	3	-1	7.25804	1	106	115	95	3	88	85	34	0	3	223	78	75	85	80	76	0	8	12	11	9	15	1	2.22222	-2	1	2	3	4	3	5	300	8	0	6	5	0	16	18	7	59	0	0	41
9135	12560	23977	5	-1	10.0999	0	119	135	98	4	95	102	30.5	0	1	194	81	81	102	68	58		10	16	24	8	22	17			0	1	2	2	4	5	300	7	0	5	4	8	7	12	10	0	63	0	63
9135	12560	23977	5	-1	10.0999	0	119	135	98	4	95	102	30.5	0	2	112	81	81	102	68	58		10	3	13	8	-3	7	10.0045		0	1	2	2	4	5	300	7	0	5	4	8	7	12	10	0	63	0	63
9135	12672	23977	6	-1	10.0999	0	119	135	98	4	95	102	37	0	3	210	81	81	102	68	58		10	-8	-6	-15	-3	2	-3.31514	0	0	2	2	2	3	5	300	6	0	4	4	0	22	4	13	61	0	0	18
9136	12511	23959	2	0	6.89938	0	112	110	110	3	106	93	2	1	1	175	87	108	96	82	89	7.31707	18	6	-2	-7	21	0	0.182927	0	1	1	2	4	3	5	300	7	1	6	4	0	51	10	1	38	0	0	36
9136	12511	23959	2	0	6.89938	0	112	110	110	3	106	93	2	1	2	143	87	108	96	82	89	7.31707	18	-4	-1	0	-7	-10	-7.5	-2	1	1	2	4	3	5	300	7	1	6	4	0	51	10	1	38	0	0	36
9136	12632	23959	3	0	6.89938	0	112	110	110	3	106	93	1	1	3	199	87	108	96	82	89	7.31707	18	-1	-1	5	-9	-2	4.44444	12	1	2	2	1	4	5	300	7	1	6	4	4	67	2	0	27	0	0	27
9137	12511	23959	2	0	6.93224	1	128	123	125	3	102	105	18.5	1	1	175					120	21.9512						-4	5.54878		1	1	2	4	3	5	300	7	1	6	4	0	51	10	1	38	0	0	36
9137	12511	23959	2	0	6.93224	1	128	123	125	3	102	105	18.5	1	2	143					120	21.9512		-14	-3	-13	-9	-9	4.31818	-20	1	1	2	4	3	5	300	7	1	6	4	0	51	10	1	38	0	0	36
9137	12632	23959	3	0	6.93224	1	128	123	125	3	102	105	7	1	3	199					120	21.9512		-1	2	1	-1	-5	25.9596	18	1	2	2	1	4	5	300	7	1	6	4	4	67	2	0	27	0	0	27
9138	12511	23959	2	0	6.93498	0	106	87	123	3	88	86	14.5	1	1	175	122	103	133	102	99	2.43902	18	-1	-1	1	-4	-6	17.561	12	1	1	2	4	3	5	300	7	1	6	4	0	51	10	1	38	0	0	36
9138	12511	23959	2	0	6.93498	0	106	87	123	3	88	86	14.5	1	2	143	122	103	133	102	99	2.43902	18	-10	-9	-12	-2	-6		-14	1	1	2	4	3	5	300	7	1	6	4	0	51	10	1	38	0	0	36
9138	12632	23959	3	0	6.93498	0	106	87	123	3	88	86	4.5	1	3	199	122	103	133	102	99	2.43902	18	2	5	-1	8	-6		2	1	2	2	1	4	5	300	7	1	6	4	4	67	2	0	27	0	0	27
9139	12511	23959	2	0	7.44969	0	106	108	102	2	109	113	2	1	1	175	99	93	94	101	114	14.6341	26		6			-13	17.8659	-26	1	1	2	4	3	5	300	7	1	6	4	0	51	10	1	38	0	0	36
9139	12511	23959	2	0	7.44969	0	106	108	102	2	109	113	2	1	2	142	99	93	94	101	114	14.6341	26		-2			-4	-21.1364	24	1	1	2	4	3	5	300	7	1	6	4	0	51	10	1	38	0	0	36
9139	12632	23959	3	0	7.44969	0	106	108	102	2	109	113	3	1	3	200	99	93	94	101	114	14.6341	26		2		-4	8	13.0808	-24	1	2	2	1	4	5	300	7	1	6	4	4	67	2	0	27	0	0	27
9140	12511	23959	2	0	6.74606	0	127	118	129	2	106	105	13	1	1	175	132	118	129	126	115	12.1951	28	-6	-3	5	-19	-19	15.3049	4	1	1	2	4	3	5	300	7	1	6	4	0	51	10	1	38	0	0	36
9140	12511	23959	2	0	6.74606	0	127	118	129	2	106	105	13	1	2	143	132	118	129	126	115	12.1951	28	0	-2	-4	6	2	-11.5909	-16	1	1	2	4	3	5	300	7	1	6	4	0	51	10	1	38	0	0	36
9140	12632	23959	3	0	6.74606	0	127	118	129	2	106	105	5	1	3	199	132	118	129	126	115	12.1951	28	-18	-4	-14	-15	-7	28.5354	8	1	2	2	1	4	5	300	7	1	6	4	4	67	2	0	27	0	0	27
9141	12511	23959	2	0	7.60301	0	99	79	119	4	96	92	11	1	1	175	109	109	115	98	98	19.5122	40	-1	-5	0	-2	-2	10.4878	-18	1	1	2	4	3	5	300	7	1	6	4	0	51	10	1	38	0	0	36
9141	12511	23959	2	0	7.60301	0	99	79	119	4	96	92	11	1	2	143	109	109	115	98	98	19.5122	40	5	2	3	11	-8	10	4	1	1	2	4	3	5	300	7	1	6	4	0	51	10	1	38	0	0	36
9141	12633	23959	3	1	7.60301	0	99	79	119	4	96	92	8.5	1	3	199	109	109	115	98	98	19.5122	40	-8	-6	-5	-9	-1	-15	2	1	2	2	2	2	5	300	8	1	5	4	0	49	5	0	46	0	0	37
9142	12511	23959	2	0	7.43326	0	115	122	103	4	96	87	2.5	1	1	175	109	98	114	101	90	7.31707	30	-6	-5	-3	-6	0	7.68293	-14	1	1	2	4	3	5	300	7	1	6	4	0	51	10	1	38	0	0	36
9142	12511	23959	2	0	7.43326	0	115	122	103	4	96	87	2.5	1	2	141	109	98	114	101	90	7.31707	30	-9	-3	-6	-2	-30	-15	2	1	1	2	4	3	5	300	7	1	6	4	0	51	10	1	38	0	0	36
9142	12633	23959	3	1	7.43326	0	115	122	103	4	96	87	9	1	3	224	109	98	114	101	90	7.31707	30	4	2	3	0	21	6.81818	0	1	2	2	2	2	5	300	8	1	5	4	0	49	5	0	46	0	0	37
9143	12511	23959	2	0	7.60301	1	89	88	93	2	111	105	10	1	1	175	92	107	92	98	85	24.3902	30	10	1	17	-2	6	-1.89024	-12	1	1	2	4	3	5	300	7	1	6	4	0	51	10	1	38	0	0	36
9143	12511	23959	2	0	7.60301	1	89	88	93	2	111	105	10	1	2	143	92	107	92	98	85	24.3902	30	-5	-2	-3	-6	-10	-20.2273	-2	1	1	2	4	3	5	300	7	1	6	4	0	51	10	1	38	0	0	36
9143	12632	23959	3	0	7.60301	1	89	88	93	2	111	105	6	1	3	199	92	107	92	98	85	24.3902	30	5	-4	5	8	-2	26.6162	10	1	2	2	1	4	5	300	7	1	6	4	4	67	2	0	27	0	0	27
9144	12511	23959	2	0	6.92676	0	108	107	106	2	112	109	9	1	1	175	121	117	119	118	106	19.5122	30	0	-6	4	-4	-5	12.9878	-2	1	1	2	4	3	5	300	7	1	6	4	0	51	10	1	38	0	0	36
9144	12511	23959	2	0	6.92676	0	108	107	106	2	112	109	9	1	2	143	121	117	119	118	106	19.5122	30	-3	-4	2	-9	-6	-23.4091	-4	1	1	2	4	3	5	300	7	1	6	4	0	51	10	1	38	0	0	36
9144	12632	23959	3	0	6.92676	0	108	107	106	2	112	109	4.5	1	3	199	121	117	119	118	106	19.5122	30	-3	5	-8	8	0	17.5758	4	1	2	2	1	4	5	300	7	1	6	4	4	67	2	0	27	0	0	27
9145	12511	23959	2	0	7.10198	1	92	88	98	2	97	100	3	1	1	175	107	92	109	104	94	7.31707	18	3	5	7	-4	2	22.6829	0	1	1	2	4	3	5	300	7	1	6	4	0	51	10	1	38	0	0	36
9145	12511	23959	2	0	7.10198	1	92	88	98	2	97	100	3	1	2	142	107	92	109	104	94	7.31707	18	-9	-3	-15	5	-8		-8	1	1	2	4	3	5	300	7	1	6	4	0	51	10	1	38	0	0	36
9145	12694	23985	3	1	7.10198	1	92	88	98	2	97	100	1.5	1	3	201	107	92	109	104	94	7.31707	18	8	4	8	5	5		16	1	2						7	1	6	5	13	52	0	0	35	0	0	35
9146	12511	23959	2	0	6.71595	1	102	101	101	2	107	116	8	1	1	175	110	109	104	116	104	4.87805	20	0	-1	0	2	-3	10.122	-4	1	1	2	4	3	5	300	7	1	6	4	0	51	10	1	38	0	0	36
9146	12511	23959	2	0	6.71595	1	102	101	101	2	107	116	8	1	2	143	110	109	104	116	104	4.87805	20	-12	-3	0	-24	-12	0.909091	4	1	1	2	4	3	5	300	7	1	6	4	0	51	10	1	38	0	0	36
9146	12632	23959	3	0	6.71595	1	102	101	101	2	107	116	8.5	1	3	199	110	109	104	116	104	4.87805	20	7	-5	13	1	-10	24.0909	8	1	2	2	1	4	5	300	7	1	6	4	4	67	2	0	27	0	0	27
9147	12511	23959	2	0	6.68036	0	97	83	112	2	143	115	3.5	1	1	175	141	116	137	132	122	17.0732	30	-8	-2	-10	-7	6	25.4268	0	1	1	2	4	3	5	300	7	1	6	4	0	51	10	1	38	0	0	36
9147	12511	23959	2	0	6.68036	0	97	83	112	2	143	115	3.5	1	2	143	141	116	137	132	122	17.0732	30	-5	-1	-7	0	-2	-11.3889	-12	1	1	2	4	3	5	300	7	1	6	4	0	51	10	1	38	0	0	36
9147	12633	23959	3	1	6.68036	0	97	83	112	2	143	115	9	1	3	199	141	116	137	132	122	17.0732	30	-3	-3	5	-12	-11	9.79798	14	1	2	2	2	2	5	300	8	1	5	4	0	49	5	0	46	0	0	37
9149	12561	23978	2	0	7.29637	0	111	103	115	2	90	81	4.5	0	1	175	87	79	93	86	86	14.6341	10	15	-11	9	19	5	7.86585	0	1	1	2	2	4	5	300	6
9149	12561	23978	2	0	7.29637	0	111	103	115	2	90	81	4.5	0	2	137	87	79	93	86	86	14.6341	10	-23	-4	-11	-34	-18	-9.16667	2	1	1	2	2	4	5	300	6
9149	12674	23978	3	0	7.29637	0	111	103	115	2	90	81	8	0	3	214	87	79	93	86	86	14.6341	10	27	15	12	41	23	13.9394	14	1	2	2	2	4	5	300	8
9150	12561	23978	2	0	7.53457	1	99	88	110	3	97	95	9.5	0	1	175	106	114	120	86	98	31.7073	30	10	-3	1	24	-9	-4.20732	6	1	1	2	2	4	5	300	6
[truncated: 1,361 more rows]
[truncated: 2 more columns]

## Sheet: Scal-Up Study Data Dictionary
Variable Name	Description	Values
Student Data
Student_ID
Teacher_ID
School_ID
Grade	study grade 2, 3, 5 or 6
Grade_Type	straight grade, high split, low split, see supporting information for manuscript	0 = straight grade, -1= low split grade (e.g. grade 1/2), 1 = high split (e.g. grade 2/3)
AgeSep1	Age on Sept. 1 of year 1 (baseline)
Sex	Child sex	0 = male, 1=female
IQcomp	KBIT IQ composite of verbal and nonverbal standard score
NonVerbalIQ	KBIT nonverbal IQ standard score
VerbalIQ	KBIT verbal IQ standard score
WorkMem	Workging memory, non-word letter span backward score
ProcSpeedNum	Processing Speed Numbers standard score
ProcSpeedLett	Processing Speed Letters standard score
DaysAbsent	Days absent in year 1 (time period 1) and year 2 (time period 3)
Curriculum	Curriculum	0 = SB2, 1= JUMP Math
TimePeriod	Time Period	1= year 1 (T2-T1), 2 = summer (T3-T2), 3 = year 2 (T4-T3)
InterTestInterval	Inter test interval in days
BroadMath_1	WJ3 broad math cluster (cal, mathflu, appprob) standard score T1 (baseline)
BroadRead_1	WJ3 broad reading cluster (LWID, readflu, passage comp) standard score T1 (baseline)
Appprob_1	WJ3 applied problems standard score T1 (baseline)
Cal_1	WJ3 calculation standard score T1 (baseline)
MathFlu_1	WJ3 math fluency standard score T1 (baseline)
CBC_1	Curriculum Based Compution Percent Correct T1 (baseline)
PSP_1	Problem Solving Process mean score T1 (baseline)
BroadMath_change	WJ3 broad math cluster (cal, mathflu, appProb) standard score change beginning to end of time period	positive value = gain
BroadRead_change	WJ3 broad reading cluster (LWID, Readflu, passage comp) standard score change beginning to end of time period	positive value = gain
Appprob_change	WJ3 applied problems standard score change beginning to end of time period	positive value = gain
Cal_change	WJ3 calculation standard score change beginning to end of time period	positive value = gain
MathFlu_change	WJ3 math fluency standard score change beginning to end of time period	positive value = gain
CBC_change	Curriculum Based Computation Change beginning to end of time period	For year 1 and year 2 only, no summer data, positive value = gain
PSP_change	Problem Solving Process change beginning to end of time period	For year 1 and year 2 only, no summer data, positive value = gain
Teacher Data
Teacher_Sex	Teacher sex	0 = male, 1=female
YearOfPart	Year participated in study	1 = participated in Year 1; 2= Participated in Year 2
Highest_level_Ed	Highest level of Education	1= BA or BSc, 2= BEd, 3= Masters, 4=PhD
Highest_MathEd	Highest level of Math Education	1=high school, 2= some undergrad, 3=undergrad, 4=some grad, 5= masters, 6= PhD in math
Yrs_TeachExp	Yearsof teaching experience	1=new teacher, 2=1-5 years teaching, 3=5-10 years teaching, 4=more than 10 years teaching experience
Math_instruct_Freq_Wk	Number of times/week taught math to participating class
Math_instruct_Time_Wk	Number of minutes/week taught math to participating class
Rate_Experience_End	Teacher rating of experience teaching math during participating year, collected in spring	1= very poor, 10 = excellent
Teacher Fidelity Data
Instructional_Approach	Curriculum in use in video observation, according to coders	0=Problem-Based Learning (business as usual for SB2), 1=Guided Discovery and Scaffolding (JUMP Math)
Alignment	Coder judgement of how well-aligned teacher intruction was with instructional approach	0= not very well aligned, to 10=really well aligned
Coder_Confidence	Coder confidence in their rating of approach	1=not very confident to 5 = very confident
Review_percent	Percent of time teacher spent reviewing
DirectInstruct_percent	Percent of time teacher spent on direct instruction
Facilitate_percent	Percent of time teacher spent facilitating
Organize_percent	Percent of time teacher spent organizing students, materials, use of classroom space and so on
Circulate_percent	Percent of time teacher spent circulating amongst students, checking on progress
Available_percent	Percent of time teacher spent available to provide input if required
Distracted_percent	Percent of time teacher spent distracted by something not related to teaching the lesson
IndivWork_percent	Percent of time students spent working individually
SmallGroupWork_percent	Percent of time students spent working in small groups
WholeClassWork_percent	Percent of time students spent working together as a whole class
